# Supplementary material for: A Comprehensive Map of Mobile Element Insertion Polymorphisms in Humans
Source: PLoS Genet. 2011 Aug 18;7(8):e1002236. doi: 10.1371/journal.pgen.1002236 (PMC3158055; doi:10.1371/journal.pgen.1002236)
Supplement: Table S1 — Combined MEI event list (external Excel file). Genomic coordinates with confidence intervals are listed for each of the 7380 MEI loci. Each event is characterized by an element type (ELEMENT = Alu, L1, or SVA), element STRAND (+ or −), detection (DET = DEL or INS for non-reference and reference MEI respectively), event ID, estimated insertion length (LEN), detection algorithm (ALG), validation status (VAL), validation method (VALMETH = PCR, ASM for assembly, 7SLRNA should be discarded due to proximity to annotated 7SLRNA element), population (POP = CEU, YRI, CHB, or JPT), allele frequency in three major groups (AF), number of genotyped samples in the three groups, number of insertion alleles in the three groups, previous study ID's (DBVARID, DBRIPID, PUBID), TSD length, number of insertion-supporting fragments from the 5′ side (NALT5), from the 3′ side (NALT3), the 1000 Genomes CALL SET name, quality value (Q), gene/exon/UTR/CDS interrupted (GENE), sub-family, and inserted sequence when available, and a list of all samples in which the alternate allele was detected (ALTSAMPLES). Note: 71 events identified by the VAL field as invalidated or in close proximity to a 7SLRNA loci are marked in yellow and were not included in the counts of interrupted genes, exons, UTRs, or CDS regions. (XLSX) [file pgen.1002236.s019.xlsx]

## Sheet: MEI catalog
CHR	POS	END	CIPOS	CIEND	ELEMENT	STRAND	DET	ID	LEN	ALG	PILOT	VAL	VALMETH	POP	AF(CEU|YRI|CHBJPT)	NG(CEU|YRI|CHBJPT)	NI(CEU|YRI|CHBJPT)	DBVARID	DBRIPID	PUBID	TSD	NALT5	NALT3	CALLSET	Q	GENE	sub-family	inserted sequence	ALTSAMPLES
1	2901396	2901710	1	1	ALU	+	DEL	P1_M_061510_1_90&P2_M_061510_1_299	314	SR,RP	lowcov+trio	val	ASM	CEU+YRI+CHB+JPT	0.84|0.45|0.54	43|39|56	72|35|60	esv4855	.	.	12	.	.	wtsi,broad,bc_deletion,washu,pindel_D,YALEU_SR,WASHU_RP,BC_RP,UWASH_RP,WTSI_RP,PINDEL_SR	.	.	AluYg6	GGGCCGGGCGCGGTGGCTCACGCCTGTAATCCCAGCACTTTGGGAGGCCGAGATGGGCAGATCACGAGGTCAGGAGATCGAGACCATCCTGGCTAACACGGTGAAACCCCGTCTCTACTAAAAATACAAAAATTAGCCGGGCATGGTGGCGCGTGCCTGTAGTCCCAGCTACACAGGAGGCTGAGGCAGGAGAATGGTGTGAACCCGGGAGGCGGAGCTTGCAGTGAGTCGAGATCGCGCCACTGCACTCCAGCCTGGGCGACAGAGCGAAACTCCGTCTCAAAAAAAAAAAAAAAAAAAAAA	NA06986,NA06994,NA07347,NA11829,NA11830,NA11831,NA11894,NA11918,NA11920,NA11994,NA12043,NA12155,NA12249,NA12287,NA12414,NA12489,NA12716,NA12717,NA12750,NA12761,NA12776,NA12813,NA12878,NA12891,NA18498,NA18502,NA18504,NA18505,NA18508,NA18510,NA18516,NA18517,NA18520,NA18523,NA18526,NA18537,NA18545,NA18547,NA18552,NA18555,NA18558,NA18563,NA18564,NA18566,NA18572,NA18573,NA18579,NA18582,NA18592,NA18603…
1	3120221	.	10	.	L1	-	INS	P2_MEI_2228	.	SR	trio	NA	.	.	.|.|.	0|0|0	0|0|0	.	.	.	.	1	0	MEI_SR	4	GENE|PRDM16|ENSG00000142611			NA19240
1	4055006	4055320	1	1	ALU	-	DEL	P1_M_061510_1_95&P2_M_061510_1_317	314	SR,RP	lowcov+trio	val	ASM	CEU+YRI+CHB+JPT	0.73|0.20|0.74	37|45|53	54|18|78	esv3887	.	.	13	.	.	wtsi,broad,bc_deletion,pindel_D,washu,UWASH_RP,YALEU_SR,BC_RP,WASHU_RP,PINDEL_SR,WTSI_RP	.	.	AluYb8	TTTTTTTTTTTTTTGAGACGGAGTCTCGCTCTGTCGCCCAGGCCGGACTGCGGACTGCAGTGGCGCAATCTCGGCTCACTGCAAGCTCCGCTTCCCGGGTTCACGCCATTCTCCTGCCTCAGCCTCCCGAGTAGCTGGGACTACAGGCGCCTGCCACCGCGCCCGGCTAATTTTTTGTATTTTTAGTAGAGACGGGGTTTCACCTTGTTAGCCAGGATGGTCTCGATCTCCTGACCTCATGATCCACCCGCCTCGGCCTCCCAAAGTGTTGGGATTACAGGCGTGAGCCACCGCGCCCGGCC	NA06986,NA07000,NA07037,NA07346,NA07347,NA07357,NA10851,NA11831,NA11881,NA11894,NA11919,NA11920,NA11931,NA11994,NA11995,NA12003,NA12005,NA12154,NA12414,NA12489,NA12763,NA12813,NA12891,NA12892,NA18486,NA18489,NA18499,NA18501,NA18502,NA18504,NA18505,NA18507,NA18508,NA18510,NA18511,NA18517,NA18520,NA18523,NA18545,NA18547,NA18558,NA18563,NA18570,NA18571,NA18572,NA18577,NA18603,NA18608,NA18853,NA18856…
1	4171066	4171343	54	42	ALU	+	DEL	P1_M_061510_1_96	277	RP	lowcov	NA	.	.	.|.|.	0|0|0	0|0|0	.	.	.	.	.	.	bc_deletion	.	.	AluYb8	TGGAGGCCGAGGCGGGTGGATCACGAGGTCAGGAGATCGAGACCATCCTGGCTAACAAGGTGAAACCCCATCTCTACTAAAAATACAAAAAAAATTAGCCGGGCGCGGTGGCGGGCGCCTGTAGTCCCAGCTACTCGGGAGGCTGAGGCAGGAGAATGGCGTGAACCCGGGAAGCGGAGCTTGCAGTGAGCCGAGATTGCGCCACTGCAGTCCGCAGTCCCACCTGGGCGACAGAGCGAGACTCCGTCTCAAAAAAAAAAAAAAAAAAAAAAAAAAAA	NA11993
1	4188309	.	5	.	ALU	-	INS	P1_MEI_1335&P2_MEI_369	296	RP|SR	lowcov+trio	val	PCR	CEU+YRI	0.05|0.25|0.00	33|34|34	3|17|0	.	.	.	12	14	8	MEI_SR,MEI_RP	80	.			NA11920,NA12044,NA18489,NA18501,NA18505,NA18517,NA18858,NA18870,NA18912,NA19108,NA19129,NA19190,NA19238,NA19239,NA19240
1	4431913	.	46	.	ALU	-	INS	P2_MEI_1348	146	RP	trio	NA	.	.	.|.|.	0|0|0	0|0|0	.	.	.	.	18	15	MEI_RP	40	.			NA19239
1	4989912	.	59	.	ALU	-	INS	P1_MEI_1336	51	RP	lowcov	NA	.	YRI	0.00|0.02|0.00	34|33|33	0|1|0	.	.	.	.	2	3	MEI_RP	10	GENE|AL691497.2|ENSG00000226735			NA19093
1	5856875	.	5	.	ALU	+	INS	P1_MEI_1&P2_MEI_373	260	RP|SR	lowcov+trio	val	PCR	CEU+YRI	0.24|0.19|0.00	50|44|51	24|17|0	.	.	.	9	57	37	MEI_SR,MEI_RP	80	GENE|NPHP4|ENSG00000131697			NA07000,NA07037,NA10847,NA11881,NA11918,NA11919,NA11992,NA11994,NA11995,NA12006,NA12043,NA12045,NA12144,NA12155,NA12156,NA12249,NA12716,NA12761,NA12812,NA12814,NA12815,NA12878,NA12891,NA12892,NA18499,NA18501,NA18502,NA18511,NA18517,NA18519,NA18523,NA18853,NA18858,NA18907,NA18916,NA19108,NA19114,NA19116,NA19137,NA19190
1	7408823	.	10	.	ALU	+	INS	P1_MEI_2&P2_MEI_1364	141	RP|SR	lowcov+trio	NA	.	YRI	0.00|0.08|0.00	51|43|43	0|7|0	.	.	.	13	12	6	MEI_SR,MEI_RP	50	GENE|CAMTA1|ENSG00000171735			NA18498,NA18508,NA18871,NA19093,NA19108,NA19141,NA19238
1	8369214	.	1	.	ALU	-	INS	P1_MEI_3&P2_MEI_1373	239	RP|SR	lowcov+trio	NA	.	CEU+YRI+CHB+JPT	0.41|0.16|0.80	52|43|46	43|14|74	.	.	Xing|GR2009|1104685352214	8	149	162	MEI_SR,MEI_RP	80	GENE|RERE|ENSG00000142599	AluYa5	TTCTTTTTTTTTTTTTTTTTTTTGAGACGGAGTCTCGCTCTGTTGCCCAGGCTGGAGTGCAGTGGCGGGATCTCGGCTCACTGCAAGCTCCGCCTCCCGGGTTCACGCCATTCTCCTGCCTCAGTCCTCCCAAGTAGCTGGGACTACAGGCGCCCGCCACTACGCCCGGCTAATTTTTTGTATTTTTAGTAGAGACGGGGGTTTCACCGTTTTAGCCGGGATGGTCTCGATCTCCTGACCTCGTGATCCGCCCGCCCTCGGCCTCCCAAAGTGCTGGGATTACAGGCGTGAGCCACCGCGCCCCGGCC	NA06986,NA07000,NA07037,NA07051,NA07357,NA10847,NA10851,NA11829,NA11830,NA11831,NA11894,NA11918,NA11919,NA11920,NA11931,NA11992,NA11993,NA11994,NA12006,NA12144,NA12155,NA12156,NA12249,NA12287,NA12414,NA12489,NA12716,NA12717,NA12750,NA12761,NA12776,NA12812,NA12814,NA12828,NA12872,NA12874,NA12892,NA18502,NA18504,NA18505,NA18526,NA18532,NA18537,NA18545,NA18547,NA18550,NA18552,NA18555,NA18558,NA18561…
1	8424578	.	5	.	ALU	-	INS	P1_MEI_3277	306	SR	lowcov	NA	.	CEU	0.27|.|.	15|0|0	8|0|0	.	.	.	18	5	1	MEI_SR	22	GENE|RERE|ENSG00000142599	AluYb9	TTTTTTTTTTTTTTTGAGACGGAGTCTCGCTCTGTCGCCCAGGCCGGACTGCGGACTGCAGTGGCGCAATCTCGGCTCACTGCAAGCTCCGCTTCCCGGGTTCACGCCATTCTCCTGCCTCAGCCTCCCCAGTAGCTGGGACTACAGGCGCCCGCCACCGCGCCCGGCTAATTTTTTGTATTTTTAGTAGAGACGGGGTTTCACCGTGTTAGCCAGGATGGTCTCGATCTCCTGACCTCATGATCCACCCGCCTCGGCCTCCCAAAGTGCTGGGACTACAGGCGTGAGCCACCGCGCCCGGCC	NA12287,NA12045,NA11931,NA12814,NA11894,NA12874
1	8450888	.	10	.	ALU	+	INS	P1_MEI_3278	.	SR	lowcov	NA	.	CEU	0.08|.|.	13|0|0	2|0|0	.	.	.	.	0	1	MEI_SR	4	GENE|RERE|ENSG00000142599			NA11931
1	9046320	9046640	1	1	ALU	-	DEL	P1_M_061510_1_100	320	RP	lowcov	val	ASM	CEU+YRI+CHB+JPT	0.97|0.81|0.96	44|53|50	85|86|96	.	.	.	7	.	.	broad,wtsi,washu,bc_deletion	.	GENE|SLC2A5|ENSG00000142583	AluY	CTTTTTTTTTTTTTTTTTTTTTTTTTTTTTTTGAGACGGAGTCTTCGCTCTGTCGCCCAGGCTGGAGTGCAGTGGCGCGATCTCGGCTCACTGCAAGCTCCGCCTCCCGGGTTCACGCCATTCTCCTGCCTCAGCCTCCCGAGTAGCTGGGACTACAGGCGCCCGCTACCACGCCCGGCTAATTTTTTGTATTTTTAGTAGAGACGGGGTTTCACCGTGTTAGCCAGGATGGTCTCGATCTCCTGACCTCGTGATCCGCCCGCCTCGGCCTCCCAAAGTGCTGGGATTACAGGCGTGAGCCACCGCGCCCGGCC	NA07357,NA11829,NA11894,NA11993,NA12004,NA12154,NA12287,NA12761,NA12813,NA12892,NA18489,NA18501,NA18507,NA18511,NA18517,NA18532,NA18547,NA18870,NA18912,NA18943,NA18951,NA18953,NA18956,NA18967,NA18968,NA18971,NA18973,NA18974,NA19099,NA19102,NA19119,NA19129,NA19144,NA19147,NA19159,NA19160,NA19171,NA19190,NA19207,NA19209,NA19210
1	11134972	.	148	.	ALU	+	INS	P1_MEI_1337	52	RP	lowcov	NA	.	YRI+CHB+JPT	0.00|0.03|0.02	36|37|41	0|2|2	.	.	.	.	2	3	MEI_RP	10	GENE|MTOR|ENSG00000198793			NA18871,NA18916,NA19005
1	11522420	.	10	.	ALU	+	INS	P2_MEI_2211	87	SR	trio	NA	.	.	.|.|.	0|0|0	0|0|0	.	.	.	.	1	0	MEI_SR	4	.			NA12878
1	11988858	.	54	.	ALU	-	INS	P1_MEI_1338	285	RP	lowcov	NA	.	CHB+JPT	0.00|0.00|0.04	39|32|46	0|0|4	.	.	.	.	3	6	MEI_RP	18	GENE|MFN2|ENSG00000116688			NA18592,NA18593,NA18948
1	12820632	12820910	1	1	ALU	+	DEL	P1_M_061510_1_913	278	RP,SR	lowcov	val	ASM	CEU+YRI+CHB+JPT	0.99|0.99|0.52	44|52|27	87|103|28	.	.	.	15	.	.	pindel_D,wtsi	.	.	AluYa5	GAGGCCAAGGCGGGCGGATCACGAGGTCAGGAGATCGAGACCATCCCGGCTAAAACGGTGAAACCCCGTCTCTACTAAAAATACAAAAAATTAGCCGGGCGTAGTGGCGGGCGCCTGTAGTCCCAGCTACTTGGGAGGCTGAGGCAGGAGAATGGCGTGAACCCGGGAGGCGGAGCTTGCAGTGAGCCGAGATTGTGCCACTGCACTCCAGCCTGGGCGACAGAGCGAGACTCCGTCTCAAAAAAAAAAAAAAAAAAAAAAAAA	NA18555,NA18563,NA18570,NA18573,NA18577,NA18579,NA18603,NA18609,NA18638,NA18952,NA18964,NA19005
1	13812606	.	12	.	ALU	-	INS	P1_MEI_1339	300	RP	lowcov	NA	.	YRI	0.00|0.15|0.00	43|37|48	0|11|0	.	.	.	12	10	13	MEI_RP	40	GENE|PDPN|ENSG00000162493			NA18499,NA18501,NA18504,NA18505,NA18523,NA18856,NA19116,NA19257
1	14308895	.	15	.	ALU	-	INS	P1_MEI_1340	151	RP	lowcov	NA	.	CEU+YRI+CHB+JPT	0.14|0.27|0.44	43|37|39	12|20|34	.	.	.	3	82	13	MEI_RP	40	GENE|C1orf196|ENSG00000218328			NA06986,NA07000,NA07051,NA11920,NA11995,NA12043,NA12249,NA12750,NA12776,NA18501,NA18507,NA18508,NA18510,NA18516,NA18519,NA18522,NA18526,NA18542,NA18545,NA18550,NA18552,NA18555,NA18558,NA18561,NA18563,NA18564,NA18572,NA18573,NA18576,NA18577,NA18582,NA18592,NA18593,NA18605,NA18608,NA18638,NA18870,NA18912,NA18940,NA18951,NA18960,NA18964,NA19005,NA19093,NA19099,NA19114,NA19129,NA19137,NA19138,NA19225
1	15362711	.	7	.	ALU	-	INS	P1_MEI_3279&P2_MEI_2215	.	SR	lowcov+trio	val	PCR	CEU	0.05|.|.	11|0|0	1|0|0	.	.	.	.	4	0	MEI_SR	11	GENE|TMEM51|ENSG00000171729			NA12873,NA12878
1	17313711	.	7	.	ALU	+	INS	P1_MEI_1341&P2_MEI_1306	204	RP	lowcov+trio	val	PCR	YRI	0.00|0.27|0.00	44|44|49	0|24|0	.	.	.	7	38	12	MEI_RP	80	GENE|PADI2|ENSG00000117115			NA18486,NA18489,NA18498,NA18499,NA18502,NA18505,NA18522,NA18853,NA18856,NA18870,NA18912,NA18916,NA19093,NA19108,NA19116,NA19137,NA19138,NA19239
1	17557351	17557673	1	1	ALU	+	DEL	P1_M_061510_1_110	322	RP	lowcov	val	ASM	CEU+YRI+CHB+JPT	0.35|0.29|0.32	26|17|17	18|10|11	.	.	.	16	.	.	wtsi,bc_deletion,washu	.	GENE|PADI4|ENSG00000159339	AluYf4	AGGCCGGGCGCGGTGGCTCACGCCTGTAATCCCAGCACTTTGGGAGGCCGAGGCGGGCGGATCACGAGGTCAGGAGATCGAGACCATCCTGGGTAACACGGTGAAACCCCGTCTCTACTAAAAATACAAAAAATTAGCCGGGCGAGGTGGCGGGCGCCTGTAGTCCCAGCTACTCCGGAGGCTGAGGCAGGAGAATGGCGTGAACTCCAGGGGGCGGAGCCTGCAGTGAGCCGAGATTGCGCCACTGCACTCCAGCCTGGACGACAGCGAGACTCCGTCTCAAAAAAAAAAAAAAATAATAATAAAA	NA07000,NA07051,NA10847,NA11894,NA11920,NA11992,NA11995,NA12043,NA12249,NA12489,NA12717,NA12750,NA12763,NA18498,NA18504,NA18505,NA18520,NA18522,NA18523,NA18526,NA18537,NA18552,NA18558,NA18563,NA18564,NA18576,NA18579,NA18592,NA18605,NA18609,NA18861,NA18870,NA18916,NA18947,NA18951,NA18953,NA18961,NA19093,NA19102,NA19172,NA19225,NA19239,NA19240,NA19257
1	18143683	.	22	.	ALU	-	INS	P1_MEI_1342	289	RP	lowcov	NA	.	YRI	0.00|0.19|0.00	39|40|46	0|15|0	.	.	.	.	6	18	MEI_RP	40	.			NA18499,NA18504,NA18508,NA18510,NA18517,NA18870,NA18871,NA18909,NA19093,NA19099,NA19116,NA19129
1	18204033	.	94	.	ALU	-	INS	P1_MEI_1343	262	RP	lowcov	NA	.	YRI	0.00|0.04|0.00	41|40|45	0|3|0	.	.	.	.	2	4	MEI_RP	12	.			NA18871,NA19190
1	19770867	.	10	.	ALU	-	INS	P2_MEI_1319	191	RP	trio	NA	.	.	.|.|.	0|0|0	0|0|0	.	.	.	12	29	27	MEI_RP	40	.			NA19238,NA19240
1	20129669	.	1	.	ALU	-	INS	P1_MEI_4&P2_MEI_350	305	RP|SR	lowcov+trio	val	PCR	CEU+CHB+JPT	0.09|0.00|0.08	48|43|45	9|0|7	.	.	Iskow|CELL2010|FSTNXB304I3EVQ	26	23	22	MEI_SR,MEI_RP	80	.	AluYa5	TTTTTTTTTNTTTTTTTTTTTTTTTTGTAGACGGAGTCTCGCTCTGTCGCCCAGGCTGGAGTGCAGTGGCGGGATCTCGGCTCACTGCAAGCTCCGCCTCCCGGGTTCACGCCATTCTCCTGCCTCAGCCTCCCAAGTAGCTGGGACTACAGGCGCCCGCCACTACGCCCGGCTAATTTTTTGTATTTTTAGTAGAGACGGGGTTTTCACCGTTTTAGCCGGGATGGTCTCGATCTCCTGACCTCGTGATCCGCCCGCCTCGGCCTCCCAAAGTGCTGGGATTACAGGCGTGAGCCACCGCGCCCGGCC	NA06986,NA07357,NA11830,NA11840,NA11881,NA12154,NA12249,NA12717,NA12873,NA12874,NA12878,NA12891,NA18571,NA18593,NA18603,NA18609,NA18948
1	20817324	.	5	.	ALU	-	INS	P1_MEI_3280	309	SR	lowcov	NA	.	.	.|.|.	0|0|0	0|0|0	.	.	.	30	7	1	MEI_SR	26	GENE|CDA|ENSG00000158825	AluYf4	TTTCTTTTTTTTTTTTTTTTTTTTTTTGAGACGGAGTCTCGCTGTCGCCCAGGCTGGAGTGCAGTGGCGCAATCTCGGCTCACTGCAGGCTCCGCCCCCTGGGGTTCACGCCATTCTCCTGCCTCAGCCTCCCGTTAGTTAGCTGGGACTACAGGCGCCCGCCACCTCGCCCGGCTAATTTTTTGTATTTTTAGTAGAGACGGGGTTTCACCGTGTTAGCCAGGATGGTCTCGACTCTCCTGACCTCGTGATCCGCCCGCCTCGGCCTCCCAAAGTGCTGGGATTACAGGCGTGAGCCACCGCGCCCGGCC	NA12814,NA11881,NA12815,NA12287,NA11931,NA12045
1	23853710	.	4	.	ALU	+	INS	P1_MEI_3281&P2_MEI_363	297	RP|SR	lowcov+trio	val	PCR	CEU	0.34|.|.	16|0|0	11|0|0	.	.	Iskow|CELL2010|FSTNXB304I8BM8	19	1	9	MEI_SR,MEI_RP	62	.	AluYa5	GCCGGGCGCGGTGGCTCACGCCTGTAATCCCAGCACTTTGGGAGGCCGAGGCGGGCGGATCACGAGGTCAGGAGATCGAGACCATCCCGGCTAAAACGGTGAAACCCCCGACTCTACTAAAAATACAAAAAATTAGCCGGGCGTAGTGGCGGGCGCCTGTAGTCCCAGCTACTTGGGAGGCTGAGGCAGGAGAATGGCGTGAACCCAGGAGGCGGAGCTTGCAGTGAGCCGAGATCGCGCCACTGCACTCCAGCCTGGGCGACAGAGCGAGACTCCGTCTAACAAAAAAAAAAAAAAAAAAAACAAAA	NA07347,NA11918,NA12234,NA12249,NA12287,NA12878,NA12891,NA12892
1	24201346	.	23	.	ALU	-	INS	P1_MEI_3282	.	SR	lowcov	NA	.	.	.|.|.	0|0|0	0|0|0	.	.	.	.	.	.	MEI_SR	3	.			NA12287,NA12873,NA12873,NA12287
1	24275572	24275889	1	1	ALU	-	DEL	P1_M_061510_1_119&P2_M_061510_1_258	317	RP,SR	lowcov+trio	val	ASM	CEU+YRI+CHB+JPT	0.65|0.56|0.58	43|47|57	56|53|66	esv5851	.	.	18	.	.	pindel_D,wtsi,washu,bc_deletion,WTSI_RP,BC_RP	.	GENE|AL591178.3|ENSG00000225315	AluYa5	TTTTTTTTTTTTTTTTTTTGAGACGGAGTCTCGCTCTGTCGCCCAGGCTGGAGTGCAGTGGCGGGATCTCGGCTCATTGCAAGCTCCACCTCCCGGGTTCACGCCATTCTCCTGCCTCAGCCTCCCAAGTAGCTGGGACTACAGGCGCCCGCCACTACGCCCGGCTAATTTTTTGTATTTTTAGTAGAGACGGGGTTTCACCGTTTTTAGCCGGGATGGTCTCGATCTCCTGACCTCGTGATCCGCCCGCCTCGGCCTCCCAAAGTGCTGGGATTACAGGCGTGAGCCACCGCGCCCGGC	NA07037,NA07051,NA10847,NA10851,NA11829,NA11831,NA11881,NA11919,NA11931,NA12006,NA12144,NA12154,NA12716,NA12751,NA12761,NA12763,NA12776,NA12828,NA18501,NA18505,NA18508,NA18510,NA18519,NA18520,NA18552,NA18562,NA18570,NA18577,NA18579,NA18592,NA18608,NA18858,NA18861,NA18871,NA18943,NA18945,NA18947,NA18948,NA18952,NA18959,NA18960,NA18961,NA18964,NA18973,NA19102,NA19129,NA19225,NA19238,NA19239,NA19240…
1	24801382	24801668	1	1	ALU	+	DEL	P1_M_061510_1_121&P2_M_061510_1_287	286	SR,RP	lowcov+trio	val	ASM	CEU+YRI+CHB+JPT	1.00|0.75|1.00	44|52|57	88|78|114	.	.	.	17	.	.	bc_deletion,washu,wtsi,pindel_D,YALEU_SR,UWASH_RP,PINDEL_SR,BC_RP	.	GENE|C1orf130|ENSG00000184454	AluYd8	TCCTGTAATCCCAGCACTTTGAGAGGCCGAGGCGGGCGGATCACGAGGTCAGGAGATCGAGACCACGGTGAAACCCCGTCTCTACTAAAAATACAAAAAATTAGCCGGGCGCAGTGGTGGGCGCCTGTAGTCCCAGCTACTCGGGAGGCTGAGGCAGGAGAATGGCGTGAACCCGGAAGGCGGAGCTTGCAGTGAGCGGAGATCGCGCCACAGCACTCCCGCCTGGGCGACAGAACGAGACTCCATCTCAAAAAAAAAAAAAAAAAAAAA	NA18486,NA18498,NA18511,NA18522,NA18853,NA18912,NA18916,NA19093,NA19210,NA19238,NA19240,NA19238,NA19240
1	24813852	.	1	.	ALU	-	INS	P1_MEI_3283&P2_MEI_2227	305	SR	lowcov+trio	NA	.	CEU	0.27|.|.	13|0|0	7|0|0	.	.	.	17	9	2	MEI_SR	43	.	AluYb8	TTTTTTTTTTTTTTTTTTTTTGTAGACGGAGTCTCGCTCTGTCGCCCAGGCCGGACTGCGGACTGCAGTGGCGCAATCTCGGCTCACTGCAAGCTCCGCTTCCCGGGTTCACGCCATTCTCCTGCCTCAGCCTCCCGAGTAGCTGGGACTACAGGCGCCCGCCACCGTGCCCGGCTAATTTTTTGTATTTTTTAGTAGAGACGGGGTTTCACCGTGTTAGCCAGGATGGTCTCGATCTCCTGACCTCATGATCCACCCGCCTCGGCCTCCCAAAGTGCTGGGATTACAGGCGTGAGCCACCGCGCCCGGCC	NA11931,NA12287,NA12815,NA12872,NA12873,NA12874,NA12878,NA19143,NA19240
1	26362399	26362725	1	1	ALU	-	DEL	P1_M_061510_1_125&P2_M_061510_1_294	326	AS,SR,RP	lowcov+trio	val	ASM	CEU+YRI+CHB+JPT	0.35|0.63|0.21	43|53|53	30|67|22	esv4795	.	.	11	.	.	washu,broad,bc_deletion,wtsi,pindel_D,WTSI_RP,UWASH_RP,PINDEL_SR,OXFDU_AS,BC_RP,YALEU_SR,WASHU_RP	.	.	AluYa5	CTTTTTTTTTTTTTTTTTTTTTTTTTTTTTTGAGACGGAGTCTCGCTCTGTCGCCCAGGCTGGAGTGCAGTGGCGGGATCTCGGCTCACTGCAAGCTCCGCCTCCCGGGTTCACGCCATTCTCCTGCCTCAGCCTCCCAAGTAGCTGGGACTACAGGCGCCCGCCACTACGCCCGGCTAATTTTTTGTATTTTTAGTAGAGACGGGGTTTCACCGTTTTAGCCGGGATGGTCTCGATCTCCTGACCTCGTGATCCGCCCGCCTCGGCCTCCCAAAGTGCTGGGATTACAGGCGTGAGCCACCGCGCCCGGCCCCCT	NA06986,NA06994,NA07000,NA07037,NA07051,NA07346,NA07347,NA07357,NA10851,NA11829,NA11830,NA11831,NA11881,NA11918,NA11919,NA11931,NA11992,NA11994,NA11995,NA12003,NA12004,NA12006,NA12043,NA12044,NA12045,NA12144,NA12154,NA12156,NA12249,NA12287,NA12414,NA12489,NA12716,NA12717,NA12749,NA12750,NA12761,NA12763,NA12776,NA12813,NA12828,NA12878,NA12891,NA12892,NA18486,NA18498,NA18501,NA18502,NA18504,NA18505…
1	27676699	27677028	1	1	ALU	+	DEL	P1_M_061510_1_127	329	SR,RP	lowcov	val	ASM	CEU+YRI+CHB+JPT	0.93|0.70|0.71	44|42|57	82|59|81	esv4796	.	.	16	.	.	bc_deletion,pindel_D,washu	.	GENE|WASF2|ENSG00000158195	AluYa5	CGGCCGGGCGCGGTGGCTCACGCCTGTAATCCCAGCACTTTGGGAGGCCGAGGCGGGCGGATCACGAGGTCAGGAGATCGAGACCATCCCGGCTAAAACGGTGAAACCCCGTCTCTACTAAAAATACAAAAAATTAGCCGGGCGTAGTGGCGGGCGCCTGTAGTCCCAGCTACTTGGGAGGCTGAGGCAGGAGAATGGCGTGAACCCGGGAGGCGGAGCTTGCAGTGAGCCGAGATCCCGCCACTGCACTCCAGCCTGGGCTACAGAGCGAGACTCCGTCTCAAAAAAAAAAAATAAATAAATAAAAAAAAAAA	NA07051,NA07346,NA18486,NA18489,NA18499,NA18520,NA18522,NA18537,NA18561,NA18570,NA18576,NA18579,NA18858,NA18871,NA19172
1	28120386	28120695	1	1	ALU	+	DEL	P1_M_061510_1_505&P2_M_061510_1_296	309	SR,AS,RP	lowcov+trio	val	ASM	CEU+YRI+CHB+JPT	0.35|0.04|0.31	41|52|56	29|4|35	esv3840	.	.	8	.	.	broad,pindel_D,washu,wtsi,UWASH_RP,OXFDU_AS,PINDEL_SR,WTSI_RP,WASHU_RP,YALEU_SR,BC_RP	.	.	AluYb8	AGGCCGGGCGCGGTGGCTCACGCCTGTAATCCCAGCACTTTGGGAGGCCGAGGCGGGTGGATCATGAGGTCAGGAGATCGAGACCATCCTGGCTAACAAGGTGAAACCCCGTCTCTACTAAAAATACAAAAAATTAGCCGGGCGCGGTGGCGGGCGCCTGTAGTCCCAGCTACTCGGGAGGCTGAGGCAGGAGAATGGCGTGAACCCGGGAAGCGGAGCTTGCAGTGAGCCGAGATTGCGCCACTGCAGTCCGCAGTCCGGCCTGGGCGACAGAGCGAGACTCCGTCTCAAAAAAAAAAAAA	NA06986,NA06994,NA07000,NA07037,NA07051,NA07346,NA07347,NA07357,NA10847,NA10851,NA11830,NA11831,NA11881,NA11894,NA11918,NA11919,NA11920,NA11931,NA11992,NA11993,NA11994,NA12004,NA12006,NA12043,NA12044,NA12144,NA12154,NA12155,NA12249,NA12414,NA12489,NA12716,NA12749,NA12750,NA12761,NA12776,NA12813,NA12878,NA12891,NA12892,NA18486,NA18489,NA18498,NA18499,NA18501,NA18502,NA18504,NA18505,NA18507,NA18508…
1	29734987	.	27	.	ALU	-	INS	P1_MEI_1344	246	RP	lowcov	NA	.	YRI	0.00|0.11|0.00	40|37|45	0|8|0	.	.	.	.	2	12	MEI_RP	28	GENE|AL049570.2|ENSG00000231360			NA18502,NA18505,NA18511,NA18916,NA19129,NA19190,NA19257
1	30813231	30814246	1	1	L1	+	DEL	P1_M_061510_1_131&P2_M_061510_1_304	1015	SR,RP	lowcov+trio	val	ASM	CEU+YRI+CHB+JPT	0.98|0.68|0.74	44|50|50	86|68|74	esv6950	.	.	16	.	.	washu,pindel_D,broad,wtsi,bc_deletion,WASHU_RP,YALEU_SR,WTSI_RP,UWASH_RP,BC_RP	.	.	L1HS	TCAACCTACAACATGGGAGAAAATTTTCGCAACCTACTCATCTGACAAAGGGCTAATATCCAGAATCTACAATGAACTCAAACAAATTTACAAGAAAAAAACAAACAACCCCATCAAAAAGTGGGCGAAGGACATGAACAGACACTTCTCAAAAGAAGACATTTATGCAGCCAAAAAACACATGAAGAAATGTTCATCATCACTGGCCATCAGAGAAATGCAAATCAAAACCACTATGAGATATCATCTCACACCAGTTAGAATGGCAATCATTAAAAAGTCAGGAAACAACAGGTGCTGGAGAGGATGCGGAGAAATAGGAACACTTTTACACTGTTGGTGGGACTGTAAACTAGTTCATCCATTGTGGAAGTCAGTGTGGCGATTCCTCAGGGATCT…	NA07000,NA07037,NA07357,NA11894,NA11993,NA12156,NA12287,NA12489,NA12717,NA12749,NA12776,NA12828,NA12891,NA18498,NA18499,NA18505,NA18507,NA18508,NA18511,NA18517,NA18519,NA18520,NA18522,NA18523,NA18545,NA18550,NA18555,NA18558,NA18562,NA18563,NA18566,NA18572,NA18576,NA18577,NA18605,NA18608,NA18609,NA18853,NA18858,NA18870,NA18916,NA18940,NA18942,NA18944,NA18949,NA18959,NA18960,NA18965,NA18972,NA18980…
1	32183857	.	10	.	L1	+	INS	P1_MEI_3284	.	SR	lowcov	NA	.	CEU	0.04|.|.	12|0|0	1|0|0	.	.	.	.	0	1	MEI_SR	4	.			NA12873
1	34052665	.	36	.	ALU	-	INS	P1_MEI_1345	211	RP	lowcov	NA	.	CEU	0.02|0.00|0.00	42|37|42	2|0|0	.	.	.	12	2	5	MEI_RP	14	GENE|CSMD2|ENSG00000121904			NA07357,NA11831
1	34408928	.	24	.	ALU	-	INS	P1_MEI_1346	42	RP	lowcov	NA	.	YRI	0.00|0.15|0.00	38|40|44	0|12|0	.	.	.	.	3	18	MEI_RP	40	GENE|C1orf94|ENSG00000142698			NA18499,NA18504,NA18508,NA18516,NA18871,NA18909,NA19093,NA19108,NA19210
1	35180460	.	64	.	ALU	-	INS	P1_MEI_1347	147	RP	lowcov	NA	.	CEU	0.02|0.00|0.00	29|31|31	1|0|0	.	.	.	.	4	2	MEI_RP	12	.			NA12717
1	36247263	.	7	.	ALU	-	INS	P1_MEI_5&P2_MEI_1347	179	RP|SR	lowcov+trio	NA	.	YRI+CHB+JPT	0.00|0.20|0.55	55|43|50	0|17|55	.	dbRIP_Alu_00470	.	22	88	82	MEI_SR,MEI_RP	80	GENE|EIF2C3|ENSG00000126070			NA18486,NA18498,NA18502,NA18519,NA18520,NA18526,NA18537,NA18542,NA18545,NA18547,NA18550,NA18552,NA18555,NA18558,NA18561,NA18563,NA18564,NA18566,NA18570,NA18571,NA18572,NA18573,NA18576,NA18579,NA18582,NA18592,NA18593,NA18608,NA18609,NA18638,NA18853,NA18870,NA18871,NA18907,NA18909,NA18916,NA18944,NA18947,NA18948,NA18949,NA18951,NA18952,NA18956,NA18959,NA18960,NA18961,NA18964,NA18965,NA18970,NA18973…
1	36984246	.	1	.	ALU	+	INS	P1_MEI_3285	311	SR	lowcov	NA	.	CEU	0.10|.|.	15|0|0	3|0|0	.	.	.	23	2	2	MEI_SR	18	.			NA11931,NA12815,NA12815
1	36988382	.	1	.	ALU	+	INS	P1_MEI_6&P2_MEI_368	302	RP|SR	lowcov+trio	val	PCR	CEU	0.43|.|.	54|0|0	46|0|0	.	.	.	14	98	60	MEI_SR,MEI_RP	80	.			NA07037,NA07051,NA07347,NA10847,NA10851,NA11829,NA11831,NA11840,NA11881,NA11918,NA11919,NA11920,NA11992,NA11993,NA11995,NA12003,NA12004,NA12006,NA12043,NA12045,NA12144,NA12155,NA12287,NA12414,NA12489,NA12716,NA12717,NA12749,NA12750,NA12761,NA12763,NA12776,NA12828,NA12872,NA12874,NA12878,NA12892,NA18526,NA18532,NA18537,NA18545,NA18547,NA18552,NA18562,NA18563,NA18566,NA18571,NA18573,NA18582,NA18592…
1	37459740	.	10	.	ALU	+	INS	P1_MEI_3286	.	SR	lowcov	NA	.	CEU	0.04|.|.	14|0|0	1|0|0	.	.	.	.	0	1	MEI_SR	4	.			NA12043
1	38220288	.	10	.	ALU	+	INS	P1_MEI_3287	.	SR	lowcov	NA	.	CEU	0.06|.|.	17|0|0	2|0|0	.	.	Iskow|CELL2010|FSTNXB304I9ELA	.	0	1	MEI_SR	4	GENE|SF3A3|ENSG00000183431			NA12815
1	39450246	.	7	.	ALU	+	INS	P1_MEI_3288&P2_MEI_2229	.	SR	lowcov+trio	NA	.	.	0.00|.|.	15|0|0	0|0|0	.	.	.	.	0	2	MEI_SR	8	GENE|MACF1|ENSG00000127603			NA19141,NA19240
1	39500574	.	23	.	L1	-	INS	P1_MEI_3289	.	SR	lowcov	NA	.	.	.|.|.	0|0|0	0|0|0	.	.	.	.	.	.	MEI_SR	3	GENE|MACF1|ENSG00000127603			NA12812
1	40297273	.	10	.	ALU	-	INS	P1_MEI_3290	.	SR	lowcov	NA	.	CEU	0.06|.|.	17|0|0	2|0|0	.	.	.	.	6	0	MEI_SR	12	GENE|CAP1|ENSG00000131236			NA19141,NA18970,NA12814,NA12872
1	41275296	.	10	.	L1	+	INS	P1_MEI_7	5987	SR|RP	lowcov	NA	.	.	0.00|.|0.00	50|0|48	0|0|0	.	.	Iskow|CELL2010|GD9QCTF02HFSP8	.	2	7	MEI_SR,MEI_RP	28	GENE|SCMH1|ENSG00000010803			NA18507,NA19116,NA19143
1	42162878	.	5	.	ALU	+	INS	P1_MEI_8	305	SR|RP	lowcov	NA	.	CEU+CHB+JPT	0.04|0.00|0.03	52|41|49	4|0|3	.	.	Iskow|CELL2010|FSTNXB304I1ESP	26	4	10	MEI_SR,MEI_RP	40	GENE|HIVEP3|ENSG00000127124	AluYa5	GGCCGGGCGCGGTGGCTCACGCCTGTAATCCCAGCACTTTGGGAGGCCGAGGCGGGCGGATCACGAGGTCAGGAGATCGAGACCATCCCGGCTAAAACGGTGAAAACCCCGCCTCTACTAAAAATACAAAAAATTAGCCGGGCGTAGTGGCGGGCGCCTGTAGTCCCAGCTACTCGGGAGGCTGAGGCAGGAGAATGGCGTGAA	NA11994,NA12144,NA12154,NA12815,NA12872,NA18964,NA18973,NA19005
1	42186994	.	10	.	ALU	-	INS	P1_MEI_3291	.	SR	lowcov	NA	.	.	0.00|.|.	13|0|0	0|0|0	.	.	.	.	1	0	MEI_SR	4	GENE|HIVEP3|ENSG00000127124			NA19141
1	42541211	.	74	.	ALU	-	INS	P1_MEI_1348	233	RP	lowcov	NA	.	YRI	0.00|0.10|0.00	35|30|35	0|6|0	.	.	.	.	3	4	MEI_RP	14	GENE|FOXJ3|ENSG00000198815			NA18522,NA18907,NA19102,NA19138
1	42780787	42781110	1	1	ALU	-	DEL	P1_M_061510_1_146	323	SR,RP	lowcov	val	ASM	CEU+YRI+CHB+JPT	0.84|0.95|0.80	44|53|49	74|101|78	.	.	.	13	.	.	wtsi,pindel_D,bc_deletion,washu	.	GENE|CCDC30|ENSG00000186409	AluYb8	TTTTTTTTTTTTTTTTTTTTGAGACGGAGTCTCGCTCTGTCGCCCAGGCCGGACTGCGGACTGCAGTGGCGCAATCTCGGCTCACTGCAAGCTCCGCTTCCCGGGTTCACGCCATTCTCCTGCCTCAGCCTCCCGAGTAGCTGGGACTACAGGCGCCCGCCACCGCGCCCGGCTAATTTTTTTTTGTATTTTTAGTAGAGACGGGGTTTCACCTTGTTAGCCAGGATGGTCTCGATCTCCTGACCTCATGATCCACCCGCCTCGGCCTCCCAAAGTGCTGGGATTACAGGCGTGAGCCACCGCGCCCGGCC	NA07346,NA11829,NA11881,NA11918,NA11919,NA11920,NA11993,NA11995,NA12155,NA12414,NA12717,NA12751,NA12891,NA18522,NA18532,NA18550,NA18552,NA18555,NA18563,NA18577,NA18579,NA18592,NA18593,NA18609,NA18638,NA18858,NA18959,NA19257
1	43055859	.	9	.	ALU	-	INS	P2_MEI_370	114	SR|RP	trio	NA	.	.	.|.|.	0|0|0	0|0|0	.	.	.	2	19	38	MEI_SR,MEI_RP	40	GENE|ERMAP|ENSG00000164010			NA19238,NA19240
1	43614979	.	5	.	ALU	+	INS	P1_MEI_1349&P2_MEI_371	263	RP|SR	lowcov+trio	val	PCR	YRI	0.00|0.02|0.00	44|42|49	0|2|0	.	.	.	13	5	2	MEI_SR,MEI_RP	5	.	AluY	GGCCGGGCGCGGTGGCTCACGCCTGTAATCCCAGCACTTTGGGAGGCCGAGGCGGGCGGATCACGAGGTCAGGAGATCGAGACCATCCTGGCTAACACGGTGAAACCCCGTCTCTACTAAAAATACAAAAAATTAGCCGGGCGTAGTGGCGGGCGCCTGTAGTCCCAGCTACTCGGGAGGCTGAGGCAGGAGAATGGCGTGAACCCGAGAGGCGGAGCTTGCAGTGAGCCGAGATTGCGCCACTGCACTCCAGCCTGGGCGACAGAGCGAGACTCCGTCTACAAAAAAAAAAAAAAAAAAAAAAAAAAAAA	NA18907,NA19238,NA19240
1	43630042	43630378	1	1	ALU	+	DEL	P1_M_061510_1_149&P2_M_061510_1_322	336	SR,RP	lowcov+trio	val	ASM	CHB+JPT	.|.|0.71	0|0|47	0|0|67	esv3099	.	.	15	.	.	wtsi,bc_deletion,WTSI_RP,UWASH_RP,PINDEL_SR,BC_RP	.	GENE|C1orf84|ENSG00000223526	AluY	AGGCCGGGCGCGGTGGCTCACGCCTGTAATCCCAGCACTTTGGGAGGCCGAGGCGGGCGGATCACGAGGTCAGGAGATCGAGACCATCCTGGCTAAAACGGTGAAACCCTGTCTCTACTAAAAAAAATACAAAAAATTAGCTGGGCGTGGTGGCGGGCGCCTGTAGTCCCAGCTACTCGGGAGGCTGAGGCAGGAGAATGGCGTGAACCCGGGAGGCGGAGCTTGCAGTGAGCTGAGATTGTGCCACTGCAGTCCAGCCTGGGCGACAGAGCGAGACTCCGTCTCAAAAAAAAAAAAAAAAAAAAAAAAAAAAAAAAAAAAA	NA06986,NA07037,NA07051,NA07346,NA07347,NA07357,NA10847,NA10851,NA11829,NA11830,NA11831,NA11881,NA11918,NA11919,NA11920,NA11931,NA11992,NA11994,NA11995,NA12004,NA12006,NA12044,NA12156,NA12249,NA12489,NA12716,NA12750,NA12761,NA12763,NA12776,NA12892,NA18489,NA18498,NA18499,NA18501,NA18502,NA18504,NA18505,NA18508,NA18510,NA18516,NA18519,NA18520,NA18522,NA18523,NA18526,NA18532,NA18542,NA18550,NA18555…
1	43981489	.	4	.	ALU	+	INS	P1_MEI_3292&P2_MEI_2230	295	SR	lowcov+trio	val	PCR	CEU	0.23|.|.	11|0|0	5|0|0	.	.	Iskow|CELL2010|FSTNXB304IGPSY	23	1	4	MEI_SR	32	GENE|ST3GAL3|ENSG00000126091			NA07347,NA11918,NA12815,NA12878
1	44126086	.	20	.	ALU	+	INS	P1_MEI_1350	290	RP	lowcov	NA	.	YRI	0.00|0.07|0.00	44|43|47	0|6|0	.	.	.	8	7	4	MEI_RP	21	GENE|ST3GAL3|ENSG00000126091			NA18499,NA18508,NA18912,NA19102,NA19129
1	44477370	.	10	.	L1	+	INS	P1_MEI_3293	.	SR	lowcov	NA	.	CEU	0.06|.|.	8|0|0	1|0|0	.	.	.	.	0	1	MEI_SR	4	GENE|ERI3|ENSG00000117419			NA11840
1	44629940	.	10	.	ALU	-	INS	P2_MEI_2231	.	SR	trio	NA	.	.	.|.|.	0|0|0	0|0|0	.	.	.	.	1	0	MEI_SR	4	.			NA19240
1	44706394	.	1	.	ALU	+	INS	P1_MEI_3294&P2_MEI_1349	292	RP|SR	lowcov+trio	NA	.	.	.|.|.	0|0|0	0|0|0	.	.	.	15	3	10	MEI_SR,MEI_RP	75	GENE|RNF220|ENSG00000187147	AluY	GGCCGGGCGCGGTGGCTCACGCCTGTAATCCCAGCACTTTGGGAGGCCGAGGCGGGCGGATCACGAGGTCAGGAGATCGAGACCATCCTGGCTAACACGGTGAAACCCCGTCTACTACTAAAAATACAAAAAATTAGCCGGGCGTGGTAGCGGGCGCCTGTAGTCCCAGCTACTCGGGAGGCTGAGGCAGGAGAATGGCGTGAACCCGGGAGGCGGAGCTTGCAGTGAGCCGAGATCGCGCCACTGCACTCCAGCCTGGGCGACAGAGCGAGACTCCGTCTCAAAAAAAAAAAAAAAAAAAA	NA07346,NA07347,NA11881,NA11918,NA11931,NA12234,NA12287,NA12892,NA19239
1	45841636	.	10	.	L1	-	INS	P2_MEI_2232	.	SR	trio	NA	.	.	.|.|.	0|0|0	0|0|0	.	.	.	.	1	0	MEI_SR	4	GENE|NASP|ENSG00000132780			NA12878
1	45979873	45980185	1	1	ALU	-	DEL	P1_M_061510_1_151&P2_M_061510_1_327	312	AS,SR,RP	lowcov+trio	val	ASM	CEU+YRI+CHB+JPT	0.61|0.77|0.62	44|53|54	54|82|67	esv4646	.	.	9	.	.	bc_deletion,pindel_D,wtsi,washu,UWASH_RP,PINDEL_SR,WTSI_RP,OXFDU_AS,BC_RP,YALEU_SR,WASHU_RP	.	GENE|IPP|ENSG00000197429	AluYk1	CTTTTTTTTTTTTTTTTTTTTTTTGAGACGGAGTCCCGCTCTTTAGCCCAGGCCGGATTGCAGTGGCACAATCTTGGCTCACTGCAAGCTCCGCCTCCCAGGTTCACGCCATTCTCCTGCCTCAGCCTCCCGAGTAGCTGGGACTACAGGCGCCCGCCACTGCGCCCGGCTAATTTTTTGTATTTTTAGTAGAGACGGGGTTTCACCGTGTTAGCCAAGATGGTCTCGATCTCCTGACCTTGTGATCCGCCCGCCTCGGCCTCCCAAAGTGCTGGGATTACAGGCGTGAGCCACCGCGCCCAGC	NA07000,NA07051,NA07346,NA10851,NA11829,NA11831,NA11894,NA11992,NA11993,NA11994,NA12003,NA12004,NA12043,NA12045,NA12144,NA12154,NA12249,NA12287,NA12414,NA12716,NA12750,NA12761,NA12763,NA12878,NA12891,NA12892,NA18489,NA18499,NA18502,NA18505,NA18522,NA18537,NA18542,NA18545,NA18547,NA18550,NA18558,NA18562,NA18566,NA18571,NA18572,NA18573,NA18577,NA18582,NA18592,NA18603,NA18605,NA18853,NA18858,NA18861…
1	46105777	.	66	.	ALU	-	INS	P1_MEI_1351	286	RP	lowcov	NA	.	CHB+JPT	0.00|0.00|0.03	44|38|46	0|0|3	.	.	.	.	2	4	MEI_RP	12	GENE|MAST2|ENSG00000086015			NA18573,NA18940
1	46138694	46139023	1	1	ALU	-	DEL	P1_M_061510_1_152&P2_M_061510_1_328	329	SR,RP	lowcov+trio	val	ASM	CEU+YRI+CHB+JPT	0.42|0.37|0.08	31|30|37	26|22|6	esv5205	.	.	18	.	.	washu,broad,pindel_D,bc_deletion,WTSI_RP,WASHU_RP,BC_RP,YALEU_SR,PINDEL_SR,UWASH_RP	.	GENE|MAST2|ENSG00000086015	AluYb8	TTTTTTTTTTTTTTTTTTTTTTTTGAGACGGAGTCTCGCTCTGTCGCCCAGGCCGGACTGCGGACTGCAGTGGCGCAATCTCGGCTCACTGCAAGCTCCGCTTCCCGGGTTCACGCCATTCTCCTGCCTCAGCCTCCCGAGTAGCTGGGACTACAGGCGCCCGCCACCGCGCCCGGCTAATTTTTTGTATTTTTAGTAGAGACGGGGTTTCACCTTGTTAGCCAGGATGGTCTCGATCTCCTGACCTCATGATCCACCTGCCTCGGCCTCCCAAAGTGCTGGGATTACAGGCGTGAGCCACCGCGCCCGGCC	NA06994,NA07000,NA07037,NA07051,NA07346,NA07347,NA07357,NA10847,NA10851,NA11830,NA11831,NA11881,NA11894,NA11918,NA11919,NA11920,NA11931,NA11992,NA11993,NA11994,NA11995,NA12003,NA12004,NA12006,NA12043,NA12044,NA12045,NA12144,NA12154,NA12155,NA12249,NA12287,NA12414,NA12489,NA12716,NA12717,NA12749,NA12750,NA12751,NA12761,NA12763,NA12813,NA12878,NA12891,NA12892,NA18486,NA18489,NA18498,NA18499,NA18501…
1	46451617	.	5	.	ALU	-	INS	P1_MEI_3295	304	SR	lowcov	NA	.	CEU	0.32|.|.	14|0|0	9|0|0	.	.	Xing|GR2009|1104685508952	16	9	1	MEI_SR	30	GENE|POMGNT1|ENSG00000085998	AluYb8	TTTTTTTTTTTTTNTTTTTTTTTTTTTTTTGTAGACGGAGTCTCGCTCTGTTGCCCAGGCCAGACTGCGGACTGCAGTGGCGCAATCTCGGCTCACTGCAAGCTCCGCTTCCCCGGGTTCACGCCATTCTCCTGCCTCTAGCCTCCCGAGTAGCTGGGACTACAGGCGCCCGCCACCGCGCCCGGCTAATTTTTTGTATTTTTAGTAGAGACGGGGTTTCACCTTGTTAGCCAGGATGGTCTCGATCTCCTGACCTCATGATCCGCCCGCCCTCGGCCTCCCAAAGTGCTGGGATTACAGGCGTGAGCCACCGCGCCTGGCC	NA19141,NA12815,NA19141,NA18970,NA07346,NA11918,NA07346,NA11881,NA12814,NA12873
1	46575256	46575546	1	1	ALU	+	DEL	P2_M_061510_1_540	290	SR,RP	trio	val	ASM	CEU+YRI+CHB+JPT	1.00|0.97|1.00	44|53|57	88|103|114	.	.	.	16	.	.	WASHU_RP,PINDEL_SR	.	.	AluYf4	GACTTTGGGAGGCCGAGGCGGGCGGATCACGAGGTCAGGAGATCGAGACCATCCTGGCTAACACGGTGAAACCCCGTCTCTACTAAAAATACAAAAAATTAGCCGGGCGAGGTGGCGGGCGCCTGTAGTCCCAGCTACTCGGGAGGCTGAGGCAGGAGAATGGCGTGAACCCCCGGGGGCGGAGCCTGCAGTGAGCCGAGATTGCGCCACTGCACTCCAGCCTGGGCGACAGCGAGACTCCGTCTCAAAAAAAAAAAAAAAAAAAAAAAAAAAAA	NA19238,NA19239,NA19240
1	46575919	46576211	1	1	ALU	+	DEL	P2_M_061510_1_650	292	RP	trio	val	ASM	CEU+YRI+CHB+JPT	1.00|0.97|0.99	44|53|57	88|103|113	esv3832	.	.	15	.	.	UWASH_RP	.	.	AluYk4	TCTGGGAGGCCGGAGCGGGCGGATCACGAGGTCAGGAGATCGAGACAATCCTGGCTAACACAGTGAAACCCCATCTCTACTAAAAATACAAAAAATTAGCCGGGCGCGGTGGCGGGCGCCTGTAGTCCCAGCTACTCGGGAGGCTGAGGCAGGAGAATGGCGTGAACCCGGGAGGCGGAGCTTGCAGTGAGCAGAAATAGCGCCACTGCACTCCGGCCTGGGTGAAAGAGCAAGGCTCCGTCTCAAAAAAAAAAAAAAACACACACACACACACAAAA	NA19238,NA19239
1	47510440	.	10	.	L1	-	INS	P2_MEI_2233	.	SR	trio	inval	PCR	.	.|.|.	0|0|0	0|0|0	.	.	.	.	1	0	MEI_SR	4	CDS|STIL|ENSG00000123473			NA12878
1	47820271	.	10	.	ALU	-	INS	P1_MEI_3296	.	SR	lowcov	NA	.	CEU	0.03|.|.	15|0|0	1|0|0	.	.	.	.	2	0	MEI_SR	5	.			NA12814
1	48745107	.	8	.	ALU	+	INS	P1_MEI_9&P2_MEI_1350	243	RP|SR	lowcov+trio	NA	.	.	0.00|.|0.00	50|0|46	0|0|0	.	.	Iskow|CELL2010|FSTNXB304H50JT	13	16	12	MEI_SR,MEI_RP	8	.			NA18498,NA18505,NA18517,NA18522,NA18858,NA19108,NA19114,NA19141,NA19147,NA19172,NA19239,NA19257
1	49117674	.	127	.	ALU	+	INS	P2_MEI_1351	97	RP	trio	NA	.	.	.|.|.	0|0|0	0|0|0	.	.	.	.	13	11	MEI_RP	40	GENE|AGBL4|ENSG00000186094			NA19238,NA19240
1	49130263	.	10	.	ALU	+	INS	P1_MEI_10	289	SR|RP	lowcov	NA	.	CEU+CHB+JPT	0.16|0.00|0.13	45|33|41	14|0|11	.	.	.	.	14	21	MEI_SR,MEI_RP	40	GENE|AGBL4|ENSG00000186094			NA10847,NA11830,NA11881,NA11918,NA11919,NA12414,NA12489,NA12716,NA12749,NA12750,NA18566,NA18593,NA18940,NA18943,NA18945,NA18949,NA18959,NA18964
1	49201316	.	16	.	L1	-	INS	P1_MEI_1352&P2_MEI_1352	5378	RP	lowcov+trio	val	PCR	CEU+YRI	0.08|0.58|.	38|38|0	6|44|0	.	.	.	.	3	75	MEI_RP	80	GENE|AGBL4|ENSG00000186094			NA06986,NA11894,NA12154,NA12761,NA12878,NA12891,NA18486,NA18489,NA18499,NA18501,NA18502,NA18504,NA18505,NA18508,NA18510,NA18516,NA18517,NA18519,NA18522,NA18561,NA18564,NA18571,NA18605,NA18856,NA18858,NA18861,NA18870,NA18907,NA18909,NA18912,NA18948,NA19093,NA19099,NA19102,NA19108,NA19116,NA19138,NA19147,NA19190,NA19225,NA19239
1	49634538	.	52	.	ALU	+	INS	P1_MEI_1353	185	RP	lowcov	NA	.	CHB+JPT	0.00|0.00|0.03	42|42|43	0|0|3	.	.	Iskow|CELL2010|FSTNXB304JCGDL	.	3	3	MEI_RP	12	GENE|AGBL4|ENSG00000186094			NA18545,NA18563,NA18949
1	50685236	.	7	.	ALU	-	INS	P1_MEI_3297&P2_MEI_2234	.	SR	lowcov+trio	NA	.	CEU	0.09|.|.	11|0|0	2|0|0	.	.	.	.	2	0	MEI_SR	8	GENE|FAF1|ENSG00000185104			NA12874,NA19240
1	50768566	.	10	.	ALU	-	INS	P1_MEI_3298	.	SR	lowcov	NA	.	CEU	0.14|.|.	7|0|0	2|0|0	.	.	.	.	1	0	MEI_SR	4	GENE|FAF1|ENSG00000185104			NA12873
1	50776476	.	20	.	ALU	+	INS	P1_MEI_1354&P2_MEI_1353	273	RP	lowcov+trio	NA	.	.	0.00|.|0.00	42|0|43	0|0|0	.	.	.	3	6	3	MEI_RP	50	GENE|FAF1|ENSG00000185104			NA18489,NA18499,NA18505,NA18511,NA18520,NA18909,NA19108,NA19116,NA19190,NA19238
1	50802547	.	12	.	ALU	-	INS	P1_MEI_1355	242	RP	lowcov	NA	.	CEU	0.12|0.00|0.00	42|41|45	10|0|0	.	.	.	10	9	12	MEI_RP	40	GENE|FAF1|ENSG00000185104			NA06986,NA07037,NA11829,NA11918,NA12004,NA12043,NA12287,NA12414,NA12776
1	51600291	.	82	.	ALU	?	INS	P1_MEI_1356	236	RP	lowcov	NA	.	CHB+JPT	.|0.00|0.01	0|39|44	0|0|1	.	.	.	.	3	3	MEI_RP	12	GENE|EPS15|ENSG00000085832			NA07346,NA12045,NA12144,NA12776,NA18964
1	51747506	.	11	.	ALU	-	INS	P2_MEI_1354	295	RP	trio	NA	.	.	.|.|.	0|0|0	0|0|0	.	.	.	7	41	35	MEI_RP	40	GENE|EPS15|ENSG00000085832			NA19238,NA19240
1	55060139	55060457	1	1	ALU	-	DEL	P1_M_061510_1_161&P2_M_061510_1_333	318	SR,RP	lowcov+trio	val	ASM	CEU+YRI+CHB+JPT	0.78|0.88|0.69	43|47|55	67|83|76	esv3026	.	.	11	.	.	washu,bc_deletion,broad,pindel_D,wtsi,BC_RP,PINDEL_SR,WTSI_RP	.	GENE|C1orf177|ENSG00000162398	AluYa5	TTTTTTTTTTTTTTTTTTTTTTTTTTTTGAGACGGAGTCTCGCTCTGTCGCCCAGGCTGGAGTGCAGTGGCGGGATCTCGGCTCACTGCAAGCTCCGCCTCCCGGGTTCACGCCATTCTCCCGCCTCAGCCTCCCAAGTAGCTGGGACTACAGGCGCCCACCACTACGCCCGGCTAATTTTTTGTATTTTTAGTAGAGACGGGGTTTCACCATTTTAGCCGGGATGGTCTCGATCTTCTGACCTCGTGATCCGCCCGCCTCGGCCTCCCAAAGTGCTGGGATTACAGGCGTGAGCCACCGCGCCCGGC	NA07346,NA07347,NA11829,NA11830,NA11881,NA11918,NA11993,NA12044,NA12154,NA12155,NA12156,NA12249,NA12716,NA12749,NA12750,NA12751,NA12761,NA12776,NA12813,NA12891,NA12892,NA18517,NA18523,NA18532,NA18550,NA18552,NA18555,NA18562,NA18570,NA18571,NA18577,NA18579,NA18582,NA18605,NA18608,NA18638,NA18856,NA18870,NA18909,NA18912,NA18943,NA18945,NA18947,NA18948,NA18953,NA18956,NA18960,NA18967,NA18968,NA18971…
1	56041243	.	34	.	L1	?	INS	P1_MEI_1357	884	RP	lowcov	NA	.	YRI+CHB+JPT	0.00|0.02|0.05	37|33|42	0|1|4	.	.	.	12	2	6	MEI_RP	16	.			NA18592,NA18961,NA18973,NA19102
1	56173870	56174191	1	1	ALU	+	DEL	P1_M_061510_1_163&P2_M_061510_1_334	321	SR,RP	lowcov+trio	val	ASM	YRI+CHB+JPT	0.00|0.11|0.05	44|52|50	0|11|5	esv2978	.	.	11	.	.	pindel_D,washu,wtsi,bc_deletion,broad,WTSI_RP,YALEU_SR,UWASH_RP,BC_RP,WASHU_RP,PINDEL_SR	.	GENE|AL606827.3|ENSG00000230250	AluYa5	GGGCCGGGCGCGGTGGCTCACGCCTGTAATCCCAGCACTTTGGGAGGCCGAGGCGGGCGGATCACGAGGTCAGGAGATCGAGACCATCCTGGCTAAAACGGTGAAACCCCGTCTCTACTAAAAATACAAAAAAAAAATTAGCCGGGCGTAGTGGCGGGCACCTGTAGTCCCAGCTACTTGGGAGGCTGAGGCAGGAGAATGGCGTGAACCCAGGAGGCGGAGCTTGCAGTGAGCCGAGATCCCGCCACTGCACTCCAGCCTGGGCAACAGAGCGAGACTCCGTCTCAAAAAAAAAAAAAAAAAAAAAAAAA	NA06986,NA06994,NA07000,NA07037,NA07051,NA07346,NA07347,NA07357,NA10847,NA10851,NA11829,NA11830,NA11831,NA11881,NA11894,NA11918,NA11919,NA11920,NA11931,NA11992,NA11993,NA11994,NA11995,NA12003,NA12004,NA12005,NA12006,NA12043,NA12044,NA12045,NA12144,NA12154,NA12155,NA12156,NA12249,NA12287,NA12414,NA12489,NA12716,NA12717,NA12749,NA12750,NA12751,NA12761,NA12763,NA12776,NA12813,NA12828,NA12878,NA12891…
1	56603694	56607549	1	1	L1	+	DEL	P1_M_061510_1_164&P2_M_061510_1_65	3855	SR,RP	lowcov+trio	val	ASM	CEU+YRI+CHB+JPT	0.44|0.62|0.58	42|48|57	37|60|66	esv4577	.	.	18	.	.	yale_solid,bc_deletion,wtsi,washu,pindel_D,broad,BC_RP,YALEU_RP,WASHU_RP,YALEU_SR,AB_RP,WTSI_RP,UWASH_RP,PINDEL_SR	.	.	L1HS	CGGGGTTGCAATCCTAGTCTCTGATAAAACAGACTTTAAACCAACAAAGATCAAAAGAGACAAAGAAGGCCATTACATAATGGTAAAGGGATCAATTCAACAAGAGGAGCTAACTATCCTAAATATTTATGCACCCAATACAGGAGCACCCAGATTCATAAAGCAAGTCCTGAGTGACCTACAAAGAGACTTAGACTCCCACACATTAATAATGGGAGACTTTAACACCCCACTGTCAATATTAGACAGATCAACGAGACAGAAAGTCAACAAGGATACCCAGGAATTGAACTCAGCTCTGCACCAAGCAGACCTAATAGACATCTACAGAACTCTCCACCCCAAATCAACAGAATATACATTTTTTTCAGCACCACACCACACCTATTCCAAAATTGA…	NA06985,NA06986,NA06994,NA07000,NA07037,NA07051,NA07346,NA07347,NA07357,NA10847,NA10851,NA11829,NA11830,NA11831,NA11881,NA11894,NA11918,NA11920,NA11992,NA11993,NA11994,NA11995,NA12004,NA12005,NA12006,NA12043,NA12044,NA12045,NA12154,NA12156,NA12249,NA12287,NA12489,NA12717,NA12749,NA12750,NA12751,NA12828,NA12878,NA12892,NA18486,NA18489,NA18499,NA18501,NA18510,NA18511,NA18519,NA18523,NA18532,NA18537…
1	56651641	.	7	.	ALU	-	INS	P1_MEI_3299&P2_MEI_2235	.	SR	lowcov+trio	NA	.	CEU	0.14|.|.	14|0|0	4|0|0	.	.	.	.	7	0	MEI_SR	15	.			NA07346,NA12234,NA12874,NA12878
1	56660290	56660607	1	1	ALU	-	DEL	P1_M_061510_1_165&P2_M_061510_1_335	317	AS,SR,RP	lowcov+trio	val	ASM	CEU+YRI+CHB+JPT	0.16|0.39|0.16	40|46|51	13|36|16	esv4146	.	.	9	.	.	pindel_D,washu,wtsi,broad,bc_deletion,WASHU_RP,PINDEL_SR,BC_RP,WTSI_RP,OXFDU_AS,YALEU_SR	.	.	AluYa5	TTTTTTTTTTTTTTTTTTTTTTTTTTTTGAGACGGAGTCTCGCTCTGTCGCCCAGGCTGGAGTGCAGTGGCGGGATCTCGGCTCACTGCAAGCTCCGCCTCCCGGGTTCACGCCATTCTCCTGCCTCAGCCTCCCAAGTAGCTGGGACTACAGGCGCCCGCCACTACGCCCGGCTAATTTTTTGTATTTTTAGTAGAGACGGGGTTTCACCGTTTTAGCCGGGATGGTCTCGATCTCCTGACCTCGTGATCCGCCCGCCTCGGCCTCCCAAAGTGCTGGGATTACAGGCGTGAGCCACCGCGCCCGGCC	NA06986,NA06994,NA07000,NA07037,NA07051,NA07346,NA07347,NA07357,NA10847,NA10851,NA11829,NA11830,NA11831,NA11881,NA11894,NA11918,NA11919,NA11920,NA11931,NA11992,NA11993,NA11994,NA11995,NA12003,NA12004,NA12005,NA12006,NA12043,NA12044,NA12045,NA12144,NA12154,NA12156,NA12249,NA12287,NA12489,NA12716,NA12717,NA12749,NA12750,NA12751,NA12763,NA12776,NA12813,NA12828,NA12878,NA12891,NA12892,NA18486,NA18498…
1	56775929	.	10	.	ALU	+	INS	P1_MEI_3300	.	SR	lowcov	NA	.	CEU	0.06|.|.	17|0|0	2|0|0	.	.	.	.	0	3	MEI_SR	7	GENE|PPAP2B|ENSG00000162407			NA12043
1	56873464	.	110	.	SVA	-	INS	P1_MEI_1358	1218	RP	lowcov	NA	.	YRI	0.00|0.23|.	15|11|0	0|5|0	.	.	.	.	2	5	MEI_RP	14	GENE|PPAP2B|ENSG00000162407			NA18522,NA18571,NA18638,NA18916,NA19108
1	57015195	57015534	1	1	ALU	+	DEL	P1_M_061510_1_166&P2_M_061510_1_336	339	AS,RP,SR	lowcov+trio	val	PCR,ASM	CEU+YRI	0.38|0.10|.	36|43|0	27|9|0	esv3554	.	.	18	.	.	pindel_D,bc_deletion,YALEU_SR,UWASH_RP,OXFDU_AS,WTSI_RP,WASHU_RP,BC_RP,PINDEL_SR	.	GENE|C1orf168|ENSG00000187889	AluYa5	GGCCGGGCGCGGTGGCTCACGCCTGTAATCCCAGCACTTTGGGAGGCCGAGGCGGGCGGATCACGAGGTCAGGAGATCGAGACCATCCCGGCTAAAACGGTGAAACCCCGTCTCTACTAAAAAATACAAAAAATTAGCCGGGCGTAGTGGCGGGCGCCTGTGGTCCCAGCTACTTGGGAGGCTGAGGCAGGAGAATGGCGGGAACCCGGGAGGCGGAGCTTGCAGTGAGCCGAGATCCCGCCACTGCACTCCAGCCTGGGCGACAGAGCGAGACTCCGTCTCAAAAACAAAAAAAAAAAAAAAAAAAAAAAAAAAAAAAAAA	NA06986,NA07000,NA07037,NA07051,NA07347,NA07357,NA10847,NA10851,NA11830,NA11831,NA11881,NA11894,NA11918,NA11920,NA11931,NA11992,NA11993,NA11994,NA11995,NA12003,NA12004,NA12006,NA12044,NA12045,NA12144,NA12154,NA12155,NA12156,NA12249,NA12287,NA12414,NA12489,NA12716,NA12717,NA12750,NA12761,NA12763,NA12776,NA12828,NA18489,NA18498,NA18499,NA18501,NA18502,NA18504,NA18505,NA18507,NA18508,NA18510,NA18511…
1	57037186	.	10	.	ALU	+	INS	P1_MEI_3301	141	SR	lowcov	NA	.	CEU	0.03|.|.	16|0|0	1|0|0	.	.	.	.	1	0	MEI_SR	4	GENE|C1orf168|ENSG00000187889			NA12815
1	57844448	.	5	.	ALU	-	INS	P2_MEI_372	210	SR|RP	trio	val	PCR	.	.|.|.	0|0|0	0|0|0	.	.	.	9	20	67	MEI_SR,MEI_RP	40	EXON|AL359739.1|ENSG00000236888			NA12878,NA12891,NA12892
1	58115799	58116123	1	1	ALU	-	DEL	P1_M_061510_1_167&P2_M_061510_1_338	324	AS,SR,RP	lowcov+trio	val	ASM	CEU+YRI+CHB+JPT	0.47|0.39|0.52	39|41|43	37|32|45	esv4838	.	.	12	.	.	pindel_D,wtsi,washu,broad,bc_deletion,BC_RP,WASHU_RP,PINDEL_SR,UWASH_RP,WTSI_RP,OXFDU_AS,YALEU_SR	.	GENE|DAB1|ENSG00000173406	AluYb8	TTTTTTTTTTTTTTTTTTTTTGAGACGGAGTCTCGCTCTGTCGCCCAGGCCGGACTGCGGACTGCAGTGGCGCAATCTCGGCTCACTGCAAGCTCCGCTTCCCGGGTTCACGCCATTCTCCTGCCTCAGCCTCCCGAGTAGCTGGGACTACAGGCGCCCACCACCGCGCCCGGCTAATTTTTTTTTTGTATTTTTAGTAGAGACGGGGTTTCACCTTGTTAGTCAGGATGGTCTCGATCTCCTGACCTCATGATCCACCCGCCTCGGCCTCCCAAAGTGCTGGGATTACAGGCGTGAGCCACCGCGCCCGGCC	NA06986,NA06994,NA07000,NA07037,NA07051,NA07346,NA10847,NA10851,NA11829,NA11831,NA11881,NA11918,NA11919,NA11920,NA11931,NA11992,NA11993,NA11994,NA11995,NA12004,NA12005,NA12044,NA12045,NA12144,NA12155,NA12156,NA12249,NA12287,NA12716,NA12717,NA12749,NA12750,NA12761,NA12763,NA12776,NA12813,NA12828,NA12878,NA12891,NA12892,NA18486,NA18489,NA18498,NA18499,NA18501,NA18502,NA18504,NA18508,NA18510,NA18511…
1	58336430	.	10	.	L1	+	INS	P1_MEI_3302	.	SR	lowcov	NA	.	CEU	0.03|.|.	15|0|0	1|0|0	.	.	.	.	0	1	MEI_SR	4	GENE|DAB1|ENSG00000173406			NA11918
1	58550112	.	21	.	ALU	-	INS	P1_MEI_1359	45	RP	lowcov	NA	.	YRI	0.00|0.05|0.00	39|37|40	0|4|0	.	.	.	9	2	13	MEI_RP	30	GENE|DAB1|ENSG00000173406			NA18519,NA18856,NA18907,NA19138
1	58832204	58832529	1	1	ALU	-	DEL	P1_M_061510_1_170&P2_M_061510_1_339	325	SR,RP	lowcov+trio	val	ASM	CEU+YRI+CHB+JPT	0.73|1.00|0.66	43|53|55	63|106|73	esv5120	.	.	18	.	.	broad,bc_deletion,washu,pindel_D,wtsi,BC_RP,WTSI_RP	.	.	AluYa5	TTTTTTTTTTTTTTTTTTTTTTTTTTTGAGACGGAGTCTCGCTCTGTCGCCCAGGCTGGAGTGCAGTGGCGGGATCTCGGCTCACTGCAAGCTCCGCCTCCCGGGTTCACGCCATTCTCCTGCCTCAGCCTCCCAAGTAGCTGGGACTACAGGCGCCCGCCACTACGCCCGGCTAATTTTTTGTATTTTTAGTAGAGACGGGGTTTCACCGTTTTAGCCGGGATGGTCTCGATCTCCTGACCTCGTGATCCGCCCGCCTCGGCCTCCCAAAGTGCTGGGATTACAGGCGTGAGCCACCGCGCCCGGCC	NA06986,NA06994,NA07000,NA10847,NA10851,NA11830,NA11894,NA11918,NA11919,NA11931,NA11993,NA11995,NA12003,NA12004,NA12005,NA12043,NA12144,NA12154,NA12155,NA12156,NA12414,NA12489,NA12716,NA12717,NA12750,NA12751,NA12813,NA12891,NA18486,NA18507,NA18511,NA18516,NA18526,NA18537,NA18542,NA18545,NA18550,NA18555,NA18562,NA18564,NA18570,NA18572,NA18577,NA18582,NA18592,NA18593,NA18603,NA18608,NA18940,NA18942…
1	58977895	.	1	.	ALU	-	INS	P1_MEI_11&P2_MEI_374	268	RP|SR	lowcov+trio	NA	.	CEU+YRI+CHB+JPT	0.09|0.12|0.08	53|40|50	10|10|8	.	.	.	10	18	56	MEI_SR,MEI_RP	80	.	AluYa5	TTTATTTTATTATTTTTTTTTTTTTTGTTAGACGGAGTCTCGCTCTGTCGCCCAGGCTGGAGTGCAGTGGCGGGATCTCGGCTCACTGCAAGCTCCGCCTCCCGGGTTCACGCCATTCTCCCGCCTCAGCCTCCCAAGTAGCTGGGACTACAGGCGCCCGCCACTACGCCCGGCTAATTTTTTGTATTTTTAGTAGAGACGGGGTTTCACCGTTTTAGCCGGGATGGTCTCGATCTCCTGACCTCGTGATCCGCCCGCCTCGGCCTCCCAAAGTGCTGGGATTACGGG	NA07000,NA07051,NA10847,NA11920,NA11931,NA11992,NA11994,NA12154,NA12249,NA12287,NA12872,NA12878,NA12891,NA18501,NA18517,NA18520,NA18542,NA18552,NA18561,NA18576,NA18582,NA18856,NA18916,NA18945,NA18965,NA18970,NA19114,NA19129,NA19190
1	59364054	.	1	.	ALU	-	INS	P1_MEI_12&P2_MEI_1355	172	RP|SR	lowcov+trio	NA	.	CEU+YRI+CHB+JPT	0.19|0.17|0.07	54|46|47	21|16|7	.	.	Iskow|CELL2010|FSTNXB304I1A10	14	37	63	MEI_SR,MEI_RP	72	.	AluYa5	TTTTTTTNTTTTTTTTTTTTTTTTTTTTTGTAGACGGAGTCTCGCTCTGTCGCCCAGGCTGGAGTGCAGTGGCGGGATCTCGGCTCACTGCAAGCTCCGCCTCCCGGGTTCACGCCATTCTCCTGCCTCAGCCTCCCAAGTAGCTGGGACTACAGGCGCCTGCCACTACGCCCGGCTAATTTTTTGTATTTTTAGTAGAGACGGGGTTTCACCGTTTTAGCCGGGATGGTCTCGATCTCCTGACCTCGTGATCCGCCCGCCTCGGCCTCCCAAAGTGCTGGGATTACAGGCGTGAGCCACCGCGCCCGGCC	NA07037,NA07051,NA07357,NA10847,NA10851,NA11831,NA11840,NA11894,NA11920,NA12044,NA12045,NA12144,NA12154,NA12155,NA12287,NA12414,NA12749,NA12761,NA12776,NA12814,NA12815,NA12878,NA12891,NA18498,NA18499,NA18502,NA18504,NA18519,NA18550,NA18561,NA18573,NA18605,NA18856,NA18861,NA18870,NA18916,NA19005,NA19129,NA19190,NA19225
1	59644450	.	1	.	ALU	-	INS	P1_MEI_13&P2_MEI_375	293	RP|SR	lowcov+trio	NA	.	YRI+CHB+JPT	.|0.10|0.30	0|39|42	0|8|25	.	.	.	13	52	72	MEI_SR,MEI_RP	80	GENE|FGGY|ENSG00000172456			NA06986,NA07037,NA10851,NA11829,NA11831,NA11919,NA11993,NA12004,NA12043,NA12489,NA12717,NA12751,NA12763,NA12814,NA12873,NA12878,NA12891,NA12892,NA18489,NA18504,NA18508,NA18532,NA18537,NA18558,NA18561,NA18562,NA18563,NA18564,NA18572,NA18576,NA18582,NA18592,NA18593,NA18605,NA18608,NA18907,NA18942,NA18948,NA18951,NA18956,NA18964,NA18965,NA19129,NA19239,NA19240,NA19257
1	60243184	.	12	.	ALU	-	INS	P1_MEI_1360	180	RP	lowcov	NA	.	CHB+JPT	.|0.00|0.16	0|41|45	0|0|14	.	.	.	8	13	33	MEI_RP	40	GENE|C1orf87|ENSG00000162598			NA07037,NA07051,NA07347,NA11831,NA11920,NA12763,NA12776,NA12828,NA18555,NA18563,NA18570,NA18577,NA18603,NA18638,NA18940,NA18951,NA18959,NA18960,NA18961
1	60487375	.	10	.	ALU	-	INS	P1_MEI_3303	205	SR	lowcov	NA	.	CEU	0.04|.|.	14|0|0	1|0|0	.	.	.	.	0	1	MEI_SR	4	.			NA12814
1	60488285	.	10	.	L1	-	INS	P1_MEI_3304	.	SR	lowcov	NA	.	CEU	0.03|.|.	15|0|0	1|0|0	.	.	.	.	1	0	MEI_SR	4	.			NA12872
1	60917169	.	10	.	ALU	-	INS	P1_MEI_14	289	SR|RP	lowcov	NA	.	.	0.00|.|.	37|0|0	0|0|0	.	.	.	.	8	8	MEI_SR,MEI_RP	40	GENE|AC105276.1|ENSG00000231252			NA18499,NA18501,NA18523,NA18564,NA18593,NA18961,NA19099,NA19116,NA19141
1	61794202	.	10	.	ALU	+	INS	P1_MEI_3305	.	SR	lowcov	NA	.	CEU	0.07|.|.	14|0|0	2|0|0	.	.	.	.	0	4	MEI_SR	8	.			NA12249,NA12249,NA12249,NA12249
1	62163174	62163523	1	1	ALU	+	DEL	P1_M_061510_1_176&P2_M_061510_1_344	349	SR,RP	lowcov+trio	val	ASM	CEU+YRI+CHB+JPT	0.27|0.33|0.36	35|39|36	19|26|26	esv5270	.	.	16	.	.	pindel_D,pindel_D,broad,wtsi,bc_deletion,WTSI_RP,WASHU_RP,BC_RP,UWASH_RP,YALEU_SR,PINDEL_SR	.	GENE|INADL|ENSG00000132849	AluYc	CGGCCGGGCGCGGTGGCTCACGCCTGTAATCCCAGCACTTTGGGAGGCCGAGGCGGGTGGATCACGAGGTCAGGAGATCGAGACCAAGGTGAAACCCCGTCTCTACTAAAAATACAAAAAGTTAGCCGGGCGTAGTGGCGGGCGCCTGTGGTCCCAGCTACTCGGGAGGCTGAGGCAGGAGAATGGCGTGAACCCGGGAGGCGGAGCTTGCAGTGAGCCGAGATCGCGCCACTGCACTCCAGCCTGGGTGACAGAGCGAGACTCCGTCTCAAAAAAAAAAAAAAAAAAAAAAAAAAAAAAAAAAAAAAAAAAAAAAAAAAAAAAAAAAAAAAAA	NA06986,NA06994,NA07000,NA07037,NA07051,NA07346,NA07347,NA07357,NA10847,NA10851,NA11829,NA11830,NA11831,NA11881,NA11894,NA11918,NA11919,NA11920,NA11931,NA11992,NA11993,NA11994,NA11995,NA12003,NA12004,NA12005,NA12006,NA12043,NA12044,NA12045,NA12144,NA12154,NA12155,NA12156,NA12249,NA12287,NA12414,NA12489,NA12716,NA12717,NA12749,NA12750,NA12751,NA12761,NA12763,NA12776,NA12813,NA12828,NA12878,NA12891…
1	62346588	.	36	.	ALU	+	INS	P1_MEI_1361	253	RP	lowcov	NA	.	CHB+JPT	0.00|0.00|0.12	36|35|38	0|0|9	.	.	.	12	12	9	MEI_RP	40	GENE|INADL|ENSG00000132849			NA18537,NA18564,NA18576,NA18592,NA18609,NA18638,NA18960,NA18964
1	62924407	62924746	1	1	ALU	-	DEL	P1_M_061510_1_178&P2_M_061510_1_345	339	SR,RP	lowcov+trio	val	ASM	CEU+YRI+CHB+JPT	0.05|0.22|0.12	39|44|43	4|19|10	esv5210	.	.	9	.	.	washu,wtsi,bc_deletion,pindel_D,UWASH_RP,PINDEL_SR,YALEU_SR,WTSI_RP,WASHU_RP,BC_RP	.	GENE|DOCK7|ENSG00000116641	AluYb8	CTTTTTTTTTTTTTTTTTTTTTTTTTTTTTTTTTTTGAGACGGAGTCTCGCTCTGTCGCCCAGGCCGGACTGCGGACTGCAGTGGCGCAATCTCGGCTCACTGCAAGCTCCGCTTCCCGGGTTCACGCCATTCTCCTGCCTCAGCCTCCCGAGTAGCTGGGACTACAGGCGCCCGCCACCGCGCCCGGCTAATTTTTTGTATTTTTTTTTTTTAGTAGAGACGGGGTTTCACCTTGTTAGCCAGGATGGTCTCGATCTCCTGACCTCATGATCCACCCGCCTCGGCCTCCCAAAGTGCTGGGATTACAGGCGTGAGCCACCGCGCCCGGCC	NA06986,NA07000,NA07037,NA07051,NA07346,NA07347,NA07357,NA10847,NA10851,NA11829,NA11830,NA11831,NA11881,NA11894,NA11918,NA11919,NA11920,NA11931,NA11992,NA11993,NA11994,NA11995,NA12003,NA12004,NA12006,NA12043,NA12044,NA12045,NA12144,NA12154,NA12156,NA12249,NA12287,NA12414,NA12489,NA12716,NA12717,NA12749,NA12750,NA12751,NA12761,NA12763,NA12776,NA12828,NA12891,NA12892,NA18498,NA18499,NA18502,NA18504…
1	63959795	.	10	.	ALU	-	INS	P2_MEI_2236	.	SR	trio	NA	.	.	.|.|.	0|0|0	0|0|0	.	.	.	.	2	0	MEI_SR	5	.	AluY	TTTTTTTTTTTTTTTTTTTTTTTGTTAGTACGGAGTCTCGCTCTGTCGCCCAGGCTGGAGTGCAGTGGCGCGATCTCGGCTCACTGCAAGCTCCGCCTCCCGGGTTCACGCCATTCTCCTGCCTCAGCCTTCCCGAGTAGCTGGGACTACAGGCGCCCGCTACCACGCCCGGCTAATTTTTTGTATTTTTAGTAGAGACGGGGTTTCACCGTGTTAGCCAGGATGGTCTCGATCTCCTGACCTCGTCGATCCGCCCGCCTCGGCCTCCCAAAGTGCTGGGATTACAGGCGTGAGCCACCGCGCCCGGCC	NA19240
1	64264370	.	28	.	ALU	-	INS	P2_MEI_1356	259	RP	trio	NA	.	.	.|.|.	0|0|0	0|0|0	.	.	.	2	6	8	MEI_RP	28	GENE|ROR1|ENSG00000185483			NA19238
1	64284342	.	60	.	ALU	+	INS	P1_MEI_1362	257	RP	lowcov	NA	.	YRI	0.00|0.01|0.00	44|38|49	0|1|0	.	.	.	.	2	2	MEI_RP	8	GENE|ROR1|ENSG00000185483			NA19129
1	64730649	.	1	.	ALU	-	INS	P1_MEI_3306&P2_MEI_376	304	RP|SR	lowcov+trio	val	PCR	CEU	0.77|.|.	13|0|0	20|0|0	.	.	Xing|GR2009|1104685764890	16	25	4	MEI_SR,MEI_RP	80	GENE|CACHD1|ENSG00000158966	AluYb8	TTTTTTGTTTTTTTTTTTTTTTTTTTTTTTGTTAGACGGAGTCTCGCTCTGTCGCCCAGGCCGGACTGCGGACTGCAGTGGCGCAATCTCGGCTCACTGCAAGCTCCGCTTCCCGGGTTCACGCCATTCTCCTGCCTCAGCCTCCCGAGTAGCTGGGACTACAGGCGCCCGCCACCGCGCCCGGCCTAATTTTTTGTATTTTTTTTTTTAGTTAGAGACGGGGTTTCACCTTGTTAGCCAGGATGGTCTCGATCTCCTGACCTCATGATCCACCCGCCTCGGCCTCCCGAAAGTGCTGGGATTACAGGCGTGACGCCACCCGCGCCCCGGCC	NA11881,NA12043,NA12045,NA12234,NA12249,NA12812,NA12872,NA12873,NA12874,NA12878,NA12891,NA12892,NA18970,NA19143,NA19238,NA19240
1	65682210	65682480	1	1	L1	-	DEL	P1_M_061510_1_185&P2_M_061510_1_350	270	SR,RP	lowcov+trio	val	ASM	CEU+YRI+CHB+JPT	0.48|0.57|0.90	41|53|57	39|60|103	esv4385	.	.	16	.	.	wtsi,washu,bc_deletion,broad,pindel_D,UWASH_RP,BC_RP,YALEU_SR,WTSI_RP,WASHU_RP,PINDEL_SR	.	GENE|LEPR|ENSG00000116678	L1HS	TTTTTTTTTTTTTTTTTTATACTCTAAGTTTTAGGGTACATGTGCACATTGTGCAGGTTAGTTACATATGTATACATGTGCCATGCTGGTGCGCTGCACCCACTAATGTGTCATCTAGCATTAGGTATATCTCCCAATGCTATCCCTCCCCCCTCCCCCGACCCCACCACAGTCCCCAGAGTGTGATATTCCCCTTCCTGTGTCCATGTGATCTCATTGTTCAATTCCCACCTATGAGTGAGAATATGCGGTGTT	NA06986,NA06994,NA07000,NA07037,NA07051,NA07346,NA07357,NA10847,NA11829,NA11830,NA11831,NA11881,NA11894,NA11918,NA11919,NA11992,NA11993,NA11994,NA12003,NA12006,NA12043,NA12154,NA12155,NA12287,NA12414,NA12489,NA12716,NA12717,NA12749,NA12750,NA12751,NA12761,NA12763,NA12776,NA12813,NA12828,NA12892,NA18486,NA18499,NA18501,NA18502,NA18504,NA18505,NA18508,NA18520,NA18523,NA18542,NA18558,NA18571,NA18573…
1	65796761	65802855	1	1	L1	-	DEL	P1_M_061510_1_186&P2_M_061510_1_351	6094	SR,RP	lowcov+trio	val	ASM	CEU+YRI+CHB+JPT	0.78|0.76|0.89	44|50|53	69|76|94	nsv436459	.	.	15	.	.	washu,pindel_D,wtsi,broad,bc_deletion,WASHU_RP,UWASH_RP,YALEU_RP,BC_RP,YALEU_SR,WTSI_RP,PINDEL_SR	.	GENE|LEPR|ENSG00000116678	L1PA2	TTTTTTTTTTTTGAATCAGAAGTTTTTTTTTTTGTTTTTTTTTTGTTTTTTTTTTTTTTTATACTTTAAGTTTTAGGGTACATGTGCACATTGTGCAGGTTAGTTACATATGTATACATGTGCCATGCTGGTGCGCTGCACCCACTAACTTGTCATCTAGCATTAGGTATATCTCCCAATGCTATCCCTCCCCCCTCCCCCCACCCCACAACAGTCCCCAGAGTGTGATATTCCCCTTCCTGTGTCCATGTGATCTCATTGTTCAGTTCCCACCTATGAGTGAGAATATGCAGTGTTTGGTTTTTTGTTCTTGCGATAGTTTACTGAGAATGATGATTTCCAATTTCATCCATGTCCCTACAAAGGACATGAACTCATCATTTTTTATGGCTGCATAGT…	NA06994,NA10847,NA11881,NA11894,NA11918,NA11920,NA11992,NA12003,NA12004,NA12005,NA12043,NA12044,NA12154,NA12155,NA12156,NA12716,NA12749,NA12751,NA12763,NA12776,NA12813,NA12878,NA12891,NA12892,NA18489,NA18498,NA18499,NA18501,NA18502,NA18505,NA18510,NA18511,NA18516,NA18523,NA18572,NA18579,NA18593,NA18608,NA18609,NA18870,NA18907,NA18916,NA18940,NA18947,NA18949,NA18960,NA18972,NA18973,NA18976,NA18981…
1	65828511	.	1	.	ALU	+	INS	P1_MEI_15&P2_MEI_377	298	RP|SR	lowcov+trio	NA	.	CEU+YRI+CHB+JPT	0.42|0.49|0.68	49|42|45	41|41|61	.	.	Xing|GR2009|1104685764582	17	161	119	MEI_SR,MEI_RP	80	GENE|LEPR|ENSG00000116678	AluYg6	GGCCGGGCGCGGTGGCTCACGCCTGTAATCCCAGCACTTTGGGAGGCCGAGACGGGCGGATCACGAGGTCAGGAGATCGAGACCATCCTGGCTAACACGGTGAAACCCTGTCTCTACTAAAAATACAAAAATTAGCCGGGCATGGTGGCGCGCGCCTGTAGTCCCAGCTACACGGGAGGCTGAGGCAGGAGAATGGCGTGAACCCGGGAGGCGGAGCTTGCAGTGAGTCGAGATCGCGCCACTGCACTCCAGCCTGGGCGACAGAGCGAAACTACCGTCTAACAAAAAAAAAAAAAAAAAAAAAAAAAA	NA07000,NA07347,NA10847,NA10851,NA11830,NA11831,NA11881,NA11894,NA11918,NA11919,NA11920,NA11931,NA11992,NA11993,NA11995,NA12003,NA12043,NA12045,NA12144,NA12154,NA12156,NA12234,NA12249,NA12287,NA12716,NA12717,NA12749,NA12750,NA12776,NA12828,NA12878,NA12891,NA12892,NA18489,NA18498,NA18501,NA18502,NA18504,NA18505,NA18507,NA18508,NA18510,NA18520,NA18523,NA18526,NA18532,NA18537,NA18542,NA18545,NA18547…
1	65851742	65852035	1	1	ALU	+	DEL	P1_M_061510_1_188&P2_M_061510_1_353	274	RP	lowcov+trio	val	ASM	CEU+YRI	0.82|0.73|.	37|35|0	61|51|0	esv5181	.	.	.	.	.	broad,bc_deletion,wtsi,WASHU_RP,UWASH_RP,BC_RP	.	GENE|LEPR|ENSG00000116678	AluYb8	GGGCCGGGCGCGGTGGCTCACGCCTGTAATCCCAGCACTTTGGGAGGCCGAGGCGGGTGGATCACGAGGTCAGGAGATCGAGACCATCCTGGCTAACAAGGTGAAACCCCGTCTCTACTAAAAATACAAAAAATTAGCCGGGCGCGGTGGCGGGCGCCTGTAGTCCCAGCTACTCGGGAGGCTGAGGCAGGAGAATGGCGTGAACCCAGGAAGCGGAGCTTGCAGTGAGCCGAGATTGCGCCATTGCAGTCCGCAGTCCGGCCTGGGCAACAGAGCGAGACTCCGTCTCAAAAA	NA06994,NA07000,NA07346,NA10851,NA11830,NA11831,NA11918,NA11919,NA11920,NA11995,NA12004,NA12043,NA12044,NA12045,NA12144,NA12156,NA12249,NA12287,NA12414,NA12717,NA12750,NA12761,NA12763,NA18486,NA18498,NA18499,NA18502,NA18504,NA18507,NA18511,NA18516,NA18519,NA18526,NA18532,NA18537,NA18542,NA18545,NA18547,NA18550,NA18552,NA18555,NA18558,NA18561,NA18562,NA18563,NA18564,NA18566,NA18570,NA18571,NA18576…
1	65908303	65908635	1	1	ALU	+	DEL	P1_M_061510_1_189&P2_M_061510_1_354	331	RP	lowcov+trio	val	ASM	CEU+YRI+CHB+JPT	0.83|0.66|0.89	44|53|57	73|70|102	esv6029	.	.	.	.	.	bc_deletion,wtsi,washu,broad,WTSI_RP,BC_RP,WASHU_RP,UWASH_RP	.	.	AluYa5	TCACCAGGCCGGGCGCGGTGGCTCACGCCTGTAATCCCAGCACTTTGGGAGGCCGAGGCGGGCGGATCACGAGGTCAGGAGATCGAGACCATCCCGGCTAAAACGGTGAAACCCCGTCTCTACTAAAAATACAAAAAAAAATTAGCCGGGCGTAGTGGCGGGCGCCTGTAGTCCCAGCTACTTGGGAGGCTGAGGCAGGAGAATGGCGTGAACCCAGGAGGCAGAGCTTGCAGTGAGCCAAGATCCCACCACTGCACTGCAGCCTGGGCGACAGAGTGAGACTCTGTCTCAAAAAAAAAAAAAAAAAAAAAAAAAAAAAAAAAAAAAAAATTC	NA06986,NA06994,NA07051,NA07357,NA11894,NA11992,NA11993,NA11994,NA12489,NA12749,NA12751,NA12763,NA12776,NA12813,NA12828,NA12891,NA18486,NA18498,NA18499,NA18501,NA18502,NA18504,NA18505,NA18507,NA18508,NA18511,NA18517,NA18520,NA18523,NA18571,NA18593,NA18609,NA18853,NA18858,NA18871,NA18912,NA18940,NA18942,NA18944,NA18948,NA18949,NA18951,NA18952,NA18965,NA18967,NA18968,NA18971,NA18972,NA18973,NA18974…
1	66036537	66036876	105	100	ALU	-	DEL	P1_M_061510_1_190	339	RP	lowcov	NA	.	.	.|.|.	0|0|0	0|0|0	esv4724	.	.	.	.	.	bc_deletion	.	GENE|PDE4B|ENSG00000184588	AluYb8	TTTTGAGACGGAGTCTCGCTCTGTCGCCCAGGTCGGACTGCGGACTGCAGTGGCGCAATCTCGGCTCACTGCAAGCTCCGCTTCCCGGGTTCACGCCATTCTCCTGCCTCAGCCTCCCGAGTAGCTGGGACTACAGGCGCCCGCCACCGCGCCCGGCTAATTTTTTGTATTTTTAGTAGAGACGGGGTTTCACCTTGTTAGCCAGGATGGTCTCGATCTCCTGACCTCGTGATCCACCCGCCTCGGCCTCCCAAAGTGCTGGGATTACAGGCGTGAGCCACCGCGCCCGGCCGTGCCAGGCTAGTCTTGAACTCCTGACCTCAAGTGATCCACCTGTCTT	NA18526,NA18555,NA18959
1	66283971	.	59	.	L1	-	INS	P1_MEI_1363	300	RP	lowcov	NA	.	YRI	0.00|0.03|0.00	41|39|44	0|2|0	.	.	.	.	2	5	MEI_RP	14	GENE|PDE4B|ENSG00000184588			NA18504,NA18861
1	66334873	.	10	.	ALU	-	INS	P1_MEI_3307	.	SR	lowcov	NA	.	.	0.00|.|.	9|0|0	0|0|0	.	.	.	.	1	0	MEI_SR	4	GENE|PDE4B|ENSG00000184588			NA19143
1	66973792	66974124	1	1	ALU	+	DEL	P1_M_061510_1_191&P2_M_061510_1_355	332	SR,RP	lowcov+trio	val	ASM	CEU+YRI+CHB+JPT	0.27|0.14|0.77	44|46|57	24|13|88	esv4277	.	.	18	.	.	broad,wtsi,washu,bc_deletion,pindel_D,UWASH_RP,PINDEL_SR,YALEU_SR,WASHU_RP,WTSI_RP,BC_RP	.	GENE|SGIP1|ENSG00000118473	AluYb8	GGCCGGGCGCGGTGGCTCACGCCTGTAATCCCAGCACTTTGGGAGGCCGAGGCGGGTGGATCATGAGGTCAGGAGATCGAGACCATCCTGGCTAACAAGGTGAAACCCCGTCTCTACTAAAAATACAAAAAATTAGCCGGGCGCGGTGGCGGGCGCCTGTAGTCCCAGCTACTCGGGAGGCTGAGGCGGGAGAATGGCGTGAACCCGGGAGGCGGAGCTTGCAGTGAGCTGAGATTGCGCCACTGCAGTCCGCAGTCCGGCCTGGGCGACAGAGCGAGACTCCGTCTCAAAAAAAAAAAAAAAAAAAAAAAAAAA	NA06986,NA06994,NA07000,NA07037,NA07051,NA07346,NA07357,NA10847,NA10851,NA11829,NA11830,NA11831,NA11881,NA11894,NA11918,NA11919,NA11920,NA11931,NA11992,NA11993,NA11994,NA11995,NA12003,NA12004,NA12005,NA12006,NA12043,NA12044,NA12045,NA12144,NA12154,NA12155,NA12156,NA12249,NA12287,NA12414,NA12489,NA12716,NA12717,NA12749,NA12750,NA12751,NA12761,NA12763,NA12776,NA12813,NA12828,NA12878,NA12891,NA12892…
1	66980716	66981039	1	1	ALU	-	DEL	P1_M_061510_1_192	323	SR,RP	lowcov	val	ASM	CEU+YRI+CHB+JPT	1.00|0.94|1.00	44|52|57	88|98|114	.	.	.	16	.	.	bc_deletion,pindel_D	.	GENE|SGIP1|ENSG00000118473	AluYk1	TTTTTTTTTTTTTTTTTTTTTTTTTTTGAGACGGAGTCTCACTCTGTCGCCCAGGCTGGAGTGCAGTGGCGCTATCCCGGCTCACTGCAAGCTCCGCCTCTTGGGTTCATGCCATTCTCCTGCCTCAGCCTCCTGAGTAGCTGGGACTACAGGCGCCCACCACCACGCCCGGCTAATTTTTTGTATTTTTAGTAGAGACGGGGTTTCACCGTGTTAGCCAGGATGGTCTCGATCTCCTGACCTCGTGATCCGCCCGCCTCGGCCTCCCAAAGTGCTGGGATTACAGGCGTGAGCCACCGCGCCCGGCC	NA18504,NA18870,NA18871
1	67027816	.	24	.	ALU	-	INS	P1_MEI_1364	36	RP	lowcov	NA	.	YRI	0.00|0.14|0.00	39|35|41	0|10|0	.	.	.	.	5	13	MEI_RP	36	.			NA18502,NA18523,NA18861,NA18870,NA18909,NA19138,NA19147,NA19257
1	67196716	.	19	.	ALU	-	INS	P2_MEI_1357	284	RP	trio	NA	.	.	.|.|.	0|0|0	0|0|0	.	.	.	.	34	29	MEI_RP	40	GENE|MIER1|ENSG00000198160			NA19239,NA19240
1	67981139	.	79	.	ALU	-	INS	P2_MEI_1358	146	RP	trio	NA	.	.	.|.|.	0|0|0	0|0|0	.	.	.	.	9	3	MEI_RP	23	GENE|GNG12|ENSG00000172380			NA19238
1	69579580	69579899	1	1	ALU	+	DEL	P1_M_061510_1_941&P2_M_061510_1_610	319	RP,SR	lowcov+trio	val	ASM	CEU+YRI+CHB+JPT	0.41|0.43|0.29	11|14|14	9|12|8	esv3304	.	.	12	.	.	washu,pindel_D,wtsi,YALEU_SR,WTSI_RP,WASHU_RP,UWASH_RP	.	.	AluYa5	CGGCCGGGCGCGGTGGCTCACGCCTGTAATCCCAGCACTTTGGGAGGCCGAGGCGGGCGGATCACGAGGTCAGGAGATCGAGACCATCCCGGCTAAAACGGTGAAACCCCGTCTCTACTAAAAATACAAAAAAATTAGCCGGGCGTAGTGGCGGGCGCCTGTAGTCCCAGCTACTTGGGAGGCTGAGGCAGGAGAATGGCATGAACCCGGGAGGCGGAGCTTGCAGTGAGCCGAGATCCCGCCACTGCACTCCAGCCTGGGCGACAGAGCGAGACTCCGTCTCAAAAAAAAAAAAAAAAAAAAAAAAA	NA06986,NA07000,NA07037,NA07051,NA07346,NA07357,NA10847,NA10851,NA11829,NA11831,NA11881,NA11894,NA11919,NA11920,NA11992,NA11994,NA12004,NA12005,NA12006,NA12043,NA12144,NA12249,NA12716,NA12717,NA12750,NA12751,NA12761,NA12763,NA12776,NA12891,NA12892,NA18499,NA18501,NA18502,NA18504,NA18505,NA18508,NA18510,NA18519,NA18520,NA18522,NA18523,NA18526,NA18537,NA18542,NA18545,NA18547,NA18550,NA18552,NA18555…
1	69716303	69716609	1	1	ALU	-	DEL	P1_M_061510_1_194&P2_M_061510_1_357	306	AS,RP,SR	lowcov+trio	val	ASM	CEU+YRI+CHB+JPT	0.25|0.21|0.22	42|49|54	21|21|24	esv4719	.	.	10	.	.	pindel_D,broad,wtsi,washu,bc_deletion,YALEU_SR,WTSI_RP,UWASH_RP,WASHU_RP,OXFDU_AS,PINDEL_SR,BC_RP	.	.	AluYa5	TTTTTTTTTTTTTTGAGACGGAGTCTCGCTCTGTCGCCCAGGCTGGAGTGCAGTGGCGGGATCTCGGCTCACTGCAAGCTCCGCCTCCCGGGTTCACGCCATTCTCCTGCCTCAGCCTCCCAAGTAGCTGGGACTACAGGCGCCCGCCACTACGCCCGGCTAATTTTTTTGTATTTTTAGTAGAGACGGGGTTTCACCATTTCTTAGCCGGGATGGTCTCAATCTCCTGACCTCGTGATCCGCCCGCCTCGGCCTCCCAAAGTGCTGGGATTACAGGCGTGAGCCACCGCGCCCGGC	NA06986,NA06994,NA07000,NA07037,NA07051,NA07346,NA07347,NA10847,NA10851,NA11829,NA11830,NA11894,NA11918,NA11919,NA11920,NA11931,NA11992,NA11994,NA11995,NA12003,NA12004,NA12005,NA12006,NA12043,NA12044,NA12045,NA12154,NA12155,NA12156,NA12249,NA12287,NA12414,NA12489,NA12716,NA12717,NA12750,NA12751,NA12761,NA12763,NA12776,NA12828,NA12878,NA12891,NA12892,NA18486,NA18489,NA18498,NA18501,NA18504,NA18505…
1	69799911	69800270	1	1	ALU	+	DEL	P1_M_061510_1_547&P2_M_061510_1_714	359	RP	lowcov+trio	val	ASM	.	.|.|.	0|0|0	0|0|0	esv9169	.	.	7	.	.	broad,WTSI_RP	.	.	AluYb9	AGGCCGGGCGCGGTGGCTCACGCCTGTAATCCCAGCACTTTGGGAGGCCGAGGCGGGTGGATCATGAGGTCAGGAGATCGAGACCATCCTGGCTAACAAGGTGAAACCCCGTCTCTACTAAAAATACAAAAAATTAGCCGGGCGCGGTGGCGGGCGCCTGTAGTCCCAGCTACTGGGGAGGCTGAGGCAGGAGAATGGCGTTGAACCCGGGAAGCGGAGCTTGCAGTGAGCCGAGATTGCGCCACTGCAGTCCGCAGTCCAGCCTGGGCGACAGAGCGAGACTCCGTCTCAAAAAAAAAAAAAAAAAAAAAAAAAAAAAAAAAAAAAAAAAAAAAAATAATAATAATAATAAT	NA06986,NA07000,NA07346,NA07347,NA07357,NA10847,NA10851,NA11829,NA11831,NA11881,NA11894,NA11918,NA11919,NA11920,NA11931,NA11992,NA11993,NA11994,NA11995,NA12003,NA12004,NA12006,NA12043,NA12044,NA12155,NA12156,NA12249,NA12287,NA12414,NA12489,NA12716,NA12749,NA12750,NA12751,NA12763,NA12776,NA12813,NA12828,NA12878,NA12891,NA12892,NA18486,NA18489,NA18498,NA18499,NA18501,NA18502,NA18504,NA18505,NA18507…
1	69834241	.	1	.	ALU	+	INS	P1_MEI_3308&P2_MEI_378	303	RP|SR	lowcov+trio	val	PCR	CEU	0.29|.|.	19|0|0	11|0|0	.	.	Xing|GR2009|1104685763673	15	4	8	MEI_SR,MEI_RP	64	GENE|LRRC7|ENSG00000033122	AluYb8	GGCCGGGCGCGGTGGCTCACGCCTGTAATCCCAGCACTTTGGGAGGCCGAGGCGGGTGGATCATGAGGTCAGGAGATCGAGACCATCCTGGCTAACAAGGTGAAACCCCGTCTCTACTAAAAATACAAAAATTAGCCGGGCGCGGTGGCGGGCGCCTGTAGTCCCAGCTACTCGGGAGGCTGAGGCAGGAGAATGGCGTGAACCCAGGAAGTGGAGCTTGCAGTGAGCCGAGATTGCGCCACTGCAGTCCGCAGTCTGGCCTGGGCGACAGAGCGAGACTCCGTCTCAAAAAAAAAAAATAAATAAA	NA12045,NA12234,NA12812,NA12873,NA12874,NA12878,NA12891,NA12892
1	69840760	.	9	.	ALU	+	INS	P1_MEI_1365&P2_MEI_1359	198	RP	lowcov+trio	NA	.	YRI	0.00|0.12|0.00	47|36|41	0|9|0	.	.	.	10	4	3	MEI_RP	54	GENE|LRRC7|ENSG00000033122			NA18498,NA18501,NA18522,NA18853,NA19116,NA19238,NA19239,NA19240
1	69863644	.	7	.	ALU	-	INS	P1_MEI_3309&P2_MEI_1360	134	RP|SR	lowcov+trio	NA	.	CEU	0.14|.|.	18|0|0	5|0|0	.	.	Iskow|CELL2010|FSTNXB304H69YT	16	12	0	MEI_SR,MEI_RP	63	GENE|LRRC7|ENSG00000033122	AluYa5	TTTTTTTTTTTTTTTTGTAGACGGAGTCTCGCTCTGTCGCCCAGGCTGGAGTGCAGTGGGCGGGATCTCGGCTCACTGCAAGCTCCGCCTCCCGGGTTCACGCCATTCTCCTGCTTCAGCCTCCCAAGTAGCTGGAACTACAGGCGCCCGCCACTACGCCCGGCTAATTTTTTTGTATTTTTAGTAGAGACGGGGTTTCACCGTTTTAGCCGGGATGGTCTCGATCTCCTGACCTCGTGATCCGCCCGCCTCGGCCTCCCAAAGTGCTGGGATTACAGGCGTGAGCCACCGCGCCCGGCC	NA11894,NA12249,NA12815,NA12872,NA18970,NA19238,NA19240
1	69866084	.	63	.	ALU	+	INS	P1_MEI_1366&P2_MEI_1361	164	RP	lowcov+trio	NA	.	CEU	0.06|0.00|0.00	36|31|37	4|0|0	.	.	.	.	4	2	MEI_RP	2	GENE|LRRC7|ENSG00000033122			NA07000,NA10847,NA12891
1	69878966	.	35	.	ALU	+	INS	P1_MEI_1367	137	RP	lowcov	NA	.	.	0.00|.|0.00	34|0|33	0|0|0	.	.	.	8	3	7	MEI_RP	20	GENE|LRRC7|ENSG00000033122			NA18511,NA18519,NA18871,NA19102,NA19108,NA19138
1	70013133	.	53	.	ALU	+	INS	P1_MEI_1368	259	RP	lowcov	NA	.	.	0.00|.|0.00	40|0|45	0|0|0	.	.	.	.	6	4	MEI_RP	20	GENE|LRRC7|ENSG00000033122			NA18499,NA18505,NA19093
1	70184932	.	10	.	ALU	-	INS	P1_MEI_3310	.	SR	lowcov	NA	.	CEU	0.06|.|.	18|0|0	2|0|0	.	.	.	.	3	0	MEI_SR	7	GENE|LRRC7|ENSG00000033122			NA11918,NA11840,NA11918
1	70540699	70541022	1	1	ALU	+	DEL	P1_M_061510_1_196&P2_M_061510_1_358	323	SR,RP	lowcov+trio	val	ASM	CEU+YRI+CHB+JPT	0.93|0.62|0.67	44|52|52	82|65|70	esv4055	.	.	16	.	.	wtsi,washu,pindel_D,broad,bc_deletion,BC_RP,PINDEL_SR,WTSI_RP,UWASH_RP,YALEU_SR,WASHU_RP	.	GENE|ANKRD13C|ENSG00000118454	AluYa5	TGGCCGGGCGCGGTGGCTCACGCCTGTAATCCCAGCACTTTGGGAGGCCAAGGCGGGCGGATCACGAGGTCAGGAGATCGAGACCATCCCGGCTAAAACGGTGAAACCCCGTCTCTACTAAAAATACAAAAAATTAGCCGGGCGTAGTGGCGGGCGCCTGTAGTCCCAGCTACTTGGGAGGCTGAGGCGGGAGAATGGCGTGAACCCGGGAGGCGGAGCTTGCAGTGAGCCGAGATCCCGCCACTGCACTCCAGCCTGGGCGACAGAGCGAGACTCCGTCTCAAAAAAAAAAAAAAAAAAAAAAAAAA	NA06994,NA07347,NA10851,NA11830,NA11894,NA11918,NA11920,NA11995,NA12045,NA12154,NA12249,NA12749,NA12751,NA12813,NA12878,NA12892,NA18486,NA18489,NA18501,NA18502,NA18505,NA18507,NA18511,NA18516,NA18517,NA18520,NA18523,NA18532,NA18550,NA18552,NA18555,NA18562,NA18563,NA18566,NA18570,NA18572,NA18576,NA18577,NA18592,NA18603,NA18605,NA18609,NA18856,NA18861,NA18871,NA18916,NA18940,NA18942,NA18944,NA18947…
1	70685005	.	1	.	ALU	+	INS	P1_MEI_3311&P2_MEI_2237	295	SR	lowcov+trio	NA	.	CEU	0.04|.|.	14|0|0	1|0|0	.	.	.	15	2	3	MEI_SR	32	.			NA12249,NA12878
1	70718777	70719108	1	1	ALU	-	DEL	P1_M_061510_1_943&P2_M_061510_1_67	331	SR,RP	lowcov+trio	val	ASM	CEU+YRI+CHB+JPT	0.08|0.24|0.14	33|17|38	5|8|11	esv4053	.	.	16	.	.	wtsi,washu,pindel_D,WASHU_RP,UWASH_RP,WTSI_RP,PINDEL_SR,YALEU_SR,AB_RP	.	.	AluY	TTTTTTTTTTTTTTTTTTTTTTTTTTGAGACGGAGTCTCGCTCTGTCGCCCAGGCTGGAGTGCAGTGGCGCGATCTCGGCTCACTGCAAGCTCCGCTTCCCGGGTTCACGCCATTCTCCTGCCTCAGCCTCCCGAGTAGCTGGGACTACAGGCGCCCGCTACCACGCCCGGCTAATTTTTTGTATTTTTTTTTTTTTTAGTAGAGACGGGGTTTCACCGTGTTAGCCAGGATGGTCTCGATCTCCTGACCTCGTGATCCACCCGCCTCGGCCTCCCAAAGTGCTGGGATTACAGGCGTGAGCCACCGCGCCCGGCC	NA06986,NA07000,NA07037,NA07051,NA07347,NA07357,NA10847,NA10851,NA11829,NA11831,NA11881,NA11894,NA11919,NA11920,NA11931,NA11992,NA11993,NA11995,NA12003,NA12004,NA12005,NA12043,NA12044,NA12144,NA12156,NA12249,NA12287,NA12414,NA12716,NA12717,NA12749,NA12750,NA12751,NA12761,NA12763,NA12776,NA12828,NA12878,NA12891,NA12892,NA18489,NA18498,NA18499,NA18501,NA18502,NA18505,NA18507,NA18508,NA18516,NA18517…
1	71513907	71514217	1	1	ALU	-	DEL	P1_M_061510_1_198&P2_M_061510_1_360	310	AS,SR,RP	lowcov+trio	val	ASM	CEU+YRI+CHB+JPT	0.31|0.27|0.33	27|30|44	17|16|29	esv3994	.	.	13	.	.	wtsi,washu,bc_deletion,pindel_D,BC_RP,YALEU_SR,WASHU_RP,UWASH_RP,OXFDU_AS,WTSI_RP,PINDEL_SR	.	.	AluYb8	TTTTTTTTTTTTTTTTTTTTTTTTTTTTTTTTTTTTTTTTTTTTTTGAGACGGAGTCTCGCTCTGTCGCCCAGGCCAGACTGCGGACTGCAGTGGCGCAATCTCGGCTCACTGCAAGCTCCGCTTCCCGGGTTCACACCATTCTCCTGCCTCAGCCTCCCGAGTAGCTGGGACTACAGGCGCCCGCCACCGCGCCCGGCTAATTTTTTGTATTTTTAGTAGAGACGGGGTTTCACCTTGTTAGCCAGGATGGTCTCGATCTCCTGACCTCATGATCCACCCGCCTCGGCCTCCCAAAG	NA06986,NA07037,NA07051,NA07346,NA07347,NA07357,NA10847,NA10851,NA11829,NA11830,NA11831,NA11881,NA11894,NA11918,NA11919,NA11920,NA11931,NA11992,NA11993,NA11995,NA12003,NA12004,NA12006,NA12043,NA12044,NA12045,NA12144,NA12154,NA12155,NA12156,NA12249,NA12287,NA12414,NA12489,NA12716,NA12717,NA12749,NA12750,NA12751,NA12761,NA12763,NA12776,NA12828,NA12878,NA12891,NA12892,NA18489,NA18498,NA18499,NA18501…
1	72286694	.	4	.	ALU	-	INS	P1_MEI_16&P2_MEI_2238	294	RP|SR	lowcov+trio	val	PCR	CEU+YRI+CHB+JPT	0.05|0.19|0.21	51|43|52	5|16|22	.	.	.	14	50	51	MEI_SR,MEI_RP	62	GENE|NEGR1|ENSG00000172260	AluYf4	TTTTTTTTTTGAGACGGAGTCTCGCTGTCGCCCAGGCTGGAGTGCAGTGGCGCAATCTCGGCTCACTGCAGGCTCCGCCCCCTGGGGTTCACGCCATTCTTCTTGCCTCAGCCTCCCGAGTAGCTGGGACTACAGGCGCCCACCACCTCGGCCCGGCTAATTTTTTTGTATTTTTAGTAGAGACGGGGGTTTCACCGTGTTAGCCAGGATGGTCTCGATCTCCTGACCTCGTGATCCGCCCGCCTCGGCCTCCCAAAGTGCTGGGATTACAGGCGTGAGCCACAGCGCCCGGCC	NA07347,NA11894,NA12006,NA12156,NA12815,NA12874,NA12878,NA18486,NA18499,NA18505,NA18511,NA18520,NA18526,NA18537,NA18545,NA18555,NA18561,NA18563,NA18564,NA18570,NA18572,NA18576,NA18592,NA18603,NA18609,NA18870,NA18916,NA18945,NA18951,NA18959,NA18964,NA18965,NA19093,NA19102,NA19108,NA19116,NA19138,NA19147,NA19190,NA19225
1	72791150	.	10	.	ALU	+	INS	P1_MEI_3312	.	SR	lowcov	NA	.	CEU	0.03|.|.	15|0|0	1|0|0	.	.	.	.	0	1	MEI_SR	4	.			NA11931
1	72979915	.	35	.	ALU	-	INS	P2_MEI_1362	51	RP	trio	val	PCR	.	.|.|.	0|0|0	0|0|0	.	.	.	.	5	3	MEI_RP	16	.			NA12891
1	73211758	.	51	.	ALU	+	INS	P1_MEI_1369	179	RP	lowcov	NA	.	CHB+JPT	0.00|0.00|0.02	40|36|46	0|0|2	.	.	.	.	4	2	MEI_RP	12	.			NA18545,NA18561
1	73526188	73526503	1	1	ALU	-	DEL	P1_M_061510_1_201&P2_M_061510_1_363	315	RP,SR,AS	lowcov+trio	val	ASM	CEU+YRI+CHB+JPT	0.01|0.28|0.03	36|49|48	1|27|3	esv4715	.	.	7	.	.	wtsi,washu,bc_deletion,broad,pindel_D,OXFDU_AS,PINDEL_SR,WTSI_RP,WASHU_RP,UWASH_RP,BC_RP,YALEU_SR	.	.	AluYa5	TTTTTTTTTTTTTTTTTTTTTTTTTTTGAGACGGAGTCTCGCTCTGTCACCCAGGCTGGAGTGCAGTGGCGGGATCTCGGCTCACTGCAAGCTCCGCCTCCCGGGTTCACGCCATTCTCCTGCCTCAGCCTCCCAAGTAGCTGGGACTACAGGCGCCCGCCACTACGCCCGGCTAATTTTTTTGTATTTTTAGTAGAGACGGGGTTTCACCGTTTTAGCCGGGATGGTCTCGATCTCTTGACCTCGTGATCCGCCCGCCTTGGCCTCCCAAAGTGCTGGGATTACAGGCGTGAGCCACCGCGCCCGGCC	NA06986,NA06994,NA07000,NA07037,NA07051,NA07346,NA07347,NA07357,NA10847,NA10851,NA11829,NA11830,NA11831,NA11881,NA11894,NA11918,NA11919,NA11920,NA11931,NA11992,NA11993,NA11994,NA11995,NA12003,NA12004,NA12006,NA12043,NA12044,NA12045,NA12144,NA12154,NA12155,NA12156,NA12249,NA12287,NA12414,NA12489,NA12716,NA12717,NA12749,NA12750,NA12751,NA12761,NA12763,NA12776,NA12813,NA12828,NA12878,NA12891,NA12892…
1	73541371	73541722	1	1	ALU	+	DEL	P1_M_061510_1_202&P2_M_061510_1_364	351	SR,RP	lowcov+trio	val	ASM	CEU+YRI+CHB+JPT	0.62|0.63|0.79	43|50|56	53|63|88	.	.	.	14	.	.	washu,broad,wtsi,pindel_D,bc_deletion,UWASH_RP,WTSI_RP,OXFDU_AS,WASHU_RP,PINDEL_SR,BC_RP	.	.	AluY	CGGCCGGGCGCGGTGGCTCACGCCTGTAATCCCAGCACTTTGGGAGGCCGAGGCGGGCGGATCACGAGGTCAGGAGATCGAGACCATCCTGGCTAACACAGTGAAACCCCGTCTCTACTAAAAAACACAAAAAAATTAGCCGGGCGTGGTGGCGGGCGCCTGTAGTCCCAGCTACTTGGGAGGCTGAGGCAGGAGAATGGCGTGAACCCGGGAGGCGGAGCTTGCAGTGAGCCGAGATCCCGCCACTGCACTCCAGCCTGGGCGACAGAGCGAGACTCCGTCTCAAAAAAAAAAAAAAAAAAAAAAGAAAAAGAAAAAAGAAAAAAGAAAAAAGAAAA	NA06994,NA07000,NA07346,NA07347,NA07357,NA10847,NA10851,NA11829,NA11830,NA11831,NA11894,NA11920,NA11931,NA11992,NA11993,NA11994,NA12004,NA12045,NA12144,NA12154,NA12249,NA12287,NA12414,NA12489,NA12716,NA12717,NA12751,NA12761,NA12763,NA12813,NA12828,NA12878,NA12891,NA12892,NA18486,NA18489,NA18499,NA18504,NA18505,NA18508,NA18511,NA18516,NA18517,NA18519,NA18532,NA18542,NA18545,NA18550,NA18562,NA18563…
1	73683682	.	9	.	ALU	+	INS	P1_MEI_3313&P2_MEI_1363	272	RP|SR	lowcov+trio	NA	.	.	0.00|.|.	17|0|0	0|0|0	.	.	.	.	0	3	MEI_SR,MEI_RP	47	.			NA19141,NA19239
1	74244230	.	4	.	ALU	+	INS	P1_MEI_17&P2_MEI_1365	304	RP|SR	lowcov+trio	NA	.	YRI	.|0.18|0.00	0|42|48	0|15|0	.	.	.	15	39	17	MEI_SR,MEI_RP	80	.			NA07000,NA07357,NA10851,NA11881,NA11919,NA11920,NA12154,NA12414,NA12717,NA12749,NA12763,NA12872,NA18499,NA18501,NA18511,NA18522,NA18870,NA18871,NA18909,NA19093,NA19116,NA19141,NA19147,NA19239,NA19240
1	74297615	.	32	.	ALU	-	INS	P1_MEI_1370	240	RP	lowcov	NA	.	.	0.00|.|0.00	36|0|35	0|0|0	.	.	.	.	7	6	MEI_RP	25	GENE|LRRIQ3|ENSG00000162620			NA18523,NA18861,NA19114,NA19257
1	74681075	.	105	.	ALU	+	INS	P2_MEI_1366	233	RP	trio	NA	.	.	.|.|.	0|0|0	0|0|0	.	.	.	.	7	3	MEI_RP	20	GENE|TNNI3K|ENSG00000116783			NA19238
1	74757107	74757841	1	1	L1	-	DEL	P1_M_061510_1_206&P2_M_061510_1_367	734	SR,RP	lowcov+trio	val	ASM	CEU+YRI+CHB+JPT	1.00|0.62|0.89	44|48|57	88|60|102	.	.	.	10	.	.	wtsi,pindel_D,washu,broad,bc_deletion,BC_RP,PINDEL_SR,WASHU_RP,UWASH_RP,WTSI_RP	.	GENE|TNNI3K|ENSG00000116783	L1HS	ATTTTTTATTTTATTTTATTTTTTTTCCCCTTTTTTTTTTTTTTTTTTTTATTATACTCTAAGTTTTAGGGTACATGTGCACATTGTGCAGGTTAGTTACATATGTATACATGTGCCATGCTGGTGCGCTGCACCCACTAATGTGTCATCTAGCATTAGGTATATCTCCCAATGCTATCCCTTCCCCCTCCCCCGACCCCACCACAGTCCCCAGAGTGTGATATTCCCCTTCCTGTGTCCATGTGATCTCATTGTTCAATTCCCACCTATGAGTGAGAATATGCGGTGTTTGGTTTTTTGTTCTTGTGATAGTTTACTGAGAATGATGGTTTCCAATTTCATCCATGTCCCTACAAAGGATATGAACTCATCATATTTTATGGCTGCATAGTATTCCAT…	NA06994,NA07051,NA07347,NA11881,NA11894,NA11920,NA11992,NA11993,NA12489,NA12751,NA12776,NA18486,NA18498,NA18505,NA18508,NA18510,NA18517,NA18519,NA18520,NA18523,NA18532,NA18563,NA18573,NA18577,NA18582,NA18592,NA18593,NA18858,NA18870,NA18907,NA18909,NA18916,NA18942,NA18945,NA18948,NA18951,NA18953,NA18961,NA18964,NA18967,NA18968,NA18971,NA18972,NA18973,NA18974,NA18976,NA18981,NA19098,NA19099,NA19102…
1	74920631	.	4	.	ALU	-	INS	P1_MEI_18&P2_MEI_1367	165	RP|SR	lowcov+trio	val	PCR	CEU+YRI+CHB+JPT	0.19|0.01|0.63	52|44|49	20|1|62	.	.	.	12	74	93	MEI_SR,MEI_RP	58	GENE|BX470253.1|ENSG00000225495	AluY	TTTCTTTTTTTTTTTGTAGACGGAGTCTCGCTCTGTCGCCCAGGCTGGAGTGCAGTGGTGCGATCTCGGCTCACTGCAAGCTCCGCCTCCCGGGTTCACGCCATTCTCCTGCCTCAGCCTCCCGAGTAGCTGGGACTACAGGCGCCCGCTACCACGCCCGGCTAATTTTTGTATTTTTTTTAGTAGAGACGGGGTTTCACCGTGTTAGCCAGAATGGTCTCGATCTCCTGACCTCGTGATCCGCCCGCCTCGGCCTCCCAAAGTGCTGGGATTACAGGCGTGAGCCACCGCGCCCGGCC	NA06986,NA07000,NA07037,NA07051,NA11840,NA11894,NA11918,NA11994,NA11995,NA12043,NA12045,NA12144,NA12249,NA12287,NA12414,NA12717,NA12750,NA12761,NA12776,NA12891,NA18498,NA18526,NA18537,NA18545,NA18552,NA18558,NA18561,NA18562,NA18563,NA18564,NA18566,NA18570,NA18571,NA18572,NA18573,NA18576,NA18577,NA18579,NA18582,NA18593,NA18603,NA18605,NA18608,NA18638,NA18940,NA18942,NA18944,NA18945,NA18948,NA18949…
1	75074260	.	1	.	ALU	-	INS	P1_MEI_19&P2_MEI_1368	272	RP|SR	lowcov+trio	NA	.	CEU+YRI+CHB+JPT	0.12|0.01|0.10	53|41|43	13|1|9	.	.	.	11	13	38	MEI_SR,MEI_RP	80	.	AluYa5	TTTTTTTTTGGTTTTTTTTTTTTTTTGTAGACGGAGTCTCGCTCTGTCGCCCAGGCTGGAGTGCAGTGGCGGGATCTCGGCTCACTGCAAGCTCCGCCTCCCGGGTTCACGCCATTCTCCTGCCTCAGCCTCCCAAGTAGCTGGGACTACAGGCGCCCGCCACTACGCCCGGCTAATTTTTTTGTATTTTTAGTAGAGACGGGGTTTCACCGTTTTAGCCGGGATGGTCTCGATCTCTTGACCTCGTGATCCGCCCGCCTCGGCCTCCCAAAGTGCTGGGATCACAGGCGTGAGCCACCGCGCCCGGCC	NA07347,NA10847,NA11829,NA11840,NA11920,NA11992,NA12154,NA12155,NA12249,NA12814,NA12878,NA12891,NA12892,NA18499,NA18526,NA18563,NA18564,NA18566,NA18573,NA18603,NA18608,NA18949,NA18961
1	75160394	.	10	.	ALU	+	INS	P1_MEI_3314	.	SR	lowcov	NA	.	CEU	0.08|.|.	6|0|0	1|0|0	.	.	.	.	0	1	MEI_SR	4	.			NA11840,NA11840,NA11840,NA12814
1	75329746	.	1	.	ALU	+	INS	P1_MEI_3315&P2_MEI_379	292	RP|SR	lowcov+trio	NA	.	CEU	0.22|.|.	16|0|0	7|0|0	.	.	.	12	4	7	MEI_SR,MEI_RP	66	.	AluYa5	GGCCGGGCGCGGTGGCTCACGCCTGTAATCCCAGCACTTTGGGAGGCCGAGGCGGGCGGATCACGAGGTCAGGAGATCGAGACCATCCCAGCTAAAACGGTGAAACCCCGTCTCTACTAAAAATACAAAAAATTAGCCGGGCGTAGTGGCGGGCGGCCTGTAGTCCCAGCTACTTGGGAGGCTGAGGCAGGAGAATGGCGTGAACCCGGGAGGCGGAGCTTGCAGTGAGCCGAGATCCCGCCACTGCACTCCAGCCTGGGCGACAGAGCGAGACTCCGTCTACAAAAAAAAAAAAAAAAAAAAAAAGAAA	NA07346,NA11840,NA12815,NA12873,NA12892,NA19141,NA19238,NA19239,NA19240
1	75784453	75784783	1	1	ALU	-	DEL	P1_M_061510_1_207&P2_M_061510_1_370	330	AS,SR,RP	lowcov+trio	val	ASM	CEU+YRI+CHB+JPT	0.05|0.10|0.15	37|31|31	4|6|9	esv4835	.	.	16	.	.	wtsi,pindel_D,bc_deletion,washu,WASHU_RP,YALEU_SR,WTSI_RP,UWASH_RP,OXFDU_AS,PINDEL_SR,BC_RP	.	GENE|SLC44A5|ENSG00000137968	AluYb8	TTTTTTTTTTTTTTTTTTTTTTTGAGACGGAGTCTCGCTCTGTCGCCCAGGTCGGACTGCGGACTGCAGTGGCGCAATCTCGGCTCACTGCAAGCTCCGCTTCCCAGGTTCACGCCATTCTCCTGCCTCAGCCTCCCGAGTAGCTGGGACTACAGGCGCCCGCCACCGCGCCCGGCTAATTTTTTGTATTTTTTTTTAGTAGAGACGGGGTTTCACCCTGTTAGCCAGGATGGTCTCGATCTCCCGACCTCATGATCCACCCGCCTCGGCCTCCCAAAGTGCTGGGATTACAGGCGTGAGCCACCGCGCCCGGCC	NA06986,NA07000,NA07037,NA07051,NA07346,NA07347,NA07357,NA10847,NA10851,NA11829,NA11830,NA11831,NA11881,NA11918,NA11919,NA11920,NA11931,NA11992,NA11993,NA11994,NA11995,NA12003,NA12005,NA12006,NA12043,NA12044,NA12045,NA12144,NA12155,NA12156,NA12249,NA12414,NA12489,NA12716,NA12717,NA12750,NA12751,NA12761,NA12763,NA12776,NA12828,NA12891,NA12892,NA18489,NA18498,NA18499,NA18501,NA18502,NA18505,NA18507…
1	75833967	.	10	.	ALU	+	INS	P1_MEI_3316	.	SR	lowcov	NA	.	CEU	0.07|.|.	14|0|0	2|0|0	.	.	.	.	0	1	MEI_SR	4	GENE|SLC44A5|ENSG00000137968			NA11918
1	76165555	.	46	.	ALU	-	INS	P1_MEI_1371	284	RP	lowcov	NA	.	CEU+YRI+CHB+JPT	0.08|0.06|0.01	33|35|36	5|4|1	.	.	.	.	6	7	MEI_RP	25	GENE|ASB17|ENSG00000154007			NA07037,NA07346,NA12003,NA12004,NA18501,NA18510,NA18517,NA18964
1	76872954	76873237	1	1	ALU	-	DEL	P1_M_061510_1_210&P2_M_061510_1_373	283	SR,RP	lowcov+trio	val	ASM	CEU+YRI+CHB+JPT	0.60|0.45|0.77	42|42|50	50|38|77	.	.	.	9	.	.	pindel_D,bc_deletion,wtsi,broad,washu,UWASH_RP,YALEU_SR,WTSI_RP,PINDEL_SR,WASHU_RP,BC_RP	.	.	AluYa5	TTTTTTTTTTTTTTTTTTTTTTTTTTTTGAGACGGAGTCTCGCTCTGTCGCCCAGGCTGGAGTGCAGTGGCGGGATCTCGGCTCACTGCAAGCTCCGCCTCCCGGGTTCACGCCATTCTCCTGCCTCAGCCTCCCAAGTAGCTGGGACTACAGGCGCCCGCCACTACGCCCGGCTAATTTTTTGTATTTTTAGTAGAGACGGGGTTTCACCGTTTTAGCCGGGATGGTCTCGATCTCCTGACCTCGTGATCCGCCCGCCTCGGCCTCCCAAAGTG	NA06986,NA06994,NA07037,NA07051,NA07346,NA07347,NA10847,NA11829,NA11830,NA11881,NA11894,NA11918,NA11919,NA11994,NA11995,NA12003,NA12004,NA12006,NA12043,NA12144,NA12154,NA12716,NA12751,NA12761,NA12763,NA12813,NA12828,NA12878,NA12892,NA18486,NA18489,NA18499,NA18501,NA18502,NA18504,NA18507,NA18508,NA18510,NA18511,NA18516,NA18517,NA18519,NA18520,NA18522,NA18523,NA18532,NA18542,NA18547,NA18552,NA18555…
1	77037661	.	10	.	ALU	+	INS	P1_MEI_20	117	SR|RP	lowcov	NA	.	YRI	0.00|0.04|0.00	47|39|45	0|3|0	.	.	.	10	4	5	MEI_SR,MEI_RP	38	.			NA18522,NA18523,NA19141,NA19257
1	77350501	.	6	.	ALU	-	INS	P1_MEI_21&P2_MEI_1369	262	RP|SR	lowcov+trio	NA	.	CEU+YRI+CHB+JPT	0.06|0.26|0.04	51|44|50	6|23|4	.	.	.	10	24	62	MEI_SR,MEI_RP	80	GENE|PIGK|ENSG00000142892			NA07037,NA12045,NA12234,NA12249,NA12489,NA12761,NA12776,NA18489,NA18498,NA18499,NA18504,NA18508,NA18510,NA18516,NA18522,NA18558,NA18603,NA18638,NA18853,NA18856,NA18858,NA18870,NA19093,NA19108,NA19138,NA19147,NA19172,NA19190,NA19239
1	77406903	.	5	.	ALU	+	INS	P1_MEI_22&P2_MEI_1370	276	RP|SR	lowcov+trio	NA	.	CEU+YRI+CHB+JPT	0.05|0.38|0.04	55|46|47	5|35|4	.	.	Xing|GR2009|1104685761921	9	64	50	MEI_SR,MEI_RP	80	GENE|PIGK|ENSG00000142892			NA07037,NA12045,NA12234,NA12249,NA12761,NA12776,NA18489,NA18499,NA18501,NA18502,NA18504,NA18505,NA18507,NA18508,NA18510,NA18517,NA18519,NA18522,NA18523,NA18558,NA18570,NA18603,NA18638,NA18853,NA18856,NA18858,NA18870,NA18871,NA18907,NA19093,NA19102,NA19108,NA19138,NA19143,NA19147,NA19172,NA19190,NA19210,NA19238,NA19239
1	77537569	.	5	.	ALU	-	INS	P1_MEI_23&P2_MEI_380	156	RP|SR	lowcov+trio	NA	.	YRI+CHB+JPT	.|0.07|0.07	0|42|48	0|6|7	.	dbRIP_Alu_00252	.	11	29	29	MEI_SR,MEI_RP	80	GENE|AK5|ENSG00000154027			NA06986,NA11830,NA11831,NA11894,NA11919,NA12003,NA12004,NA12006,NA12043,NA12044,NA12154,NA12414,NA12716,NA12751,NA12874,NA12878,NA12891,NA18516,NA18519,NA18552,NA18563,NA18579,NA18853,NA18907,NA18951,NA18959,NA18970,NA19147,NA19238
1	77794313	.	10	.	ALU	-	INS	P1_MEI_3317	.	SR	lowcov	NA	.	CEU	0.04|.|.	14|0|0	1|0|0	.	.	.	.	1	0	MEI_SR	4	GENE|AK5|ENSG00000154027			NA11931
1	78379641	.	1	.	ALU	-	INS	P1_MEI_24&P2_MEI_381	292	RP|SR	lowcov+trio	NA	.	CEU+YRI+CHB+JPT	0.16|0.13|0.69	48|43|47	15|11|65	.	.	.	13	78	113	MEI_SR,MEI_RP	80	.	AluYa5	TTCTTTTTTTTGTTTTTTTTTTTTTTTTTGAGTACGGAGTCTCGCTCTGTCGCCCAGGCTGGAGTGCAGTGGCGGGATCTCGGCTCACTGCAAGCTCCGCCTCCCGGGTTCACGCCATTCTCCTGCCTCAGCCTCCCAAGTAGCTGGGACTACAGGCGCCCGCCACTACGCCTGGCTAATTTTTTGTATTTTTAGTAGAGACGGGGTTTCACCGTTTTAGCCGGGATGGTCTCGATCTCCTGACCTCGTGATCCGCCCGCCTCGGGCCTCCCAAAGTGCTGGGATTACAGGCGTGAGCCACCGCGCCCGGCC	NA07037,NA07346,NA07357,NA11918,NA11920,NA11931,NA12044,NA12045,NA12249,NA12287,NA12750,NA12763,NA12828,NA12873,NA12878,NA12891,NA18504,NA18523,NA18526,NA18537,NA18542,NA18545,NA18550,NA18552,NA18558,NA18561,NA18562,NA18563,NA18564,NA18566,NA18570,NA18571,NA18572,NA18573,NA18576,NA18577,NA18592,NA18593,NA18603,NA18605,NA18609,NA18638,NA18870,NA18909,NA18916,NA18940,NA18942,NA18943,NA18944,NA18945…
1	78881418	.	5	.	ALU	-	INS	P1_MEI_25&P2_MEI_1371	110	RP|SR	lowcov+trio	val	PCR	CEU	0.08|0.00|.	52|41|0	8|0|0	.	.	.	14	13	21	MEI_SR,MEI_RP	80	.			NA07037,NA11881,NA11918,NA12004,NA12006,NA12287,NA12776,NA12815,NA12878,NA12891,NA12892,NA18537,NA18542,NA18555,NA18558,NA18561,NA18566,NA18582,NA18959,NA18961,NA18980
1	79103783	.	7	.	ALU	-	INS	P1_MEI_3318&P2_MEI_2239	.	SR	lowcov+trio	NA	.	CEU	0.16|.|.	16|0|0	5|0|0	.	.	Iskow|CELL2010|FSTNXB304IH9I1	.	9	0	MEI_SR	19	.			NA07347,NA11894,NA11918,NA12874,NA12878
1	79174096	79174418	1	1	ALU	+	DEL	P1_M_061510_1_213&P2_M_061510_1_376	322	RP,SR	lowcov+trio	val	ASM	CEU+YRI+CHB+JPT	0.19|0.51|0.27	34|49|57	13|50|31	esv4207	.	.	18	.	.	pindel_D,broad,bc_deletion,washu,wtsi,YALEU_SR,WTSI_RP,UWASH_RP,BC_RP,WASHU_RP,PINDEL_SR	.	GENE|ELTD1|ENSG00000162618	AluY	GGGCCGGGCGCGGTGGCTCACGCTTGTAATCCCAGCACTTTGGGAGGCCGAGGCGGGCGGATCACGAGGTCAGGAGATCGAGACCATCCTGGCTAACACGGTGAAACCCCGTCTCTACTAAAAATACAAAAAAATTAGCCGGGCGTGATGGCGGGCGCCTGTAGTCCCAGCTACTCGGGAGGCTGAGGCAGGAGAATGGCGTGAACCCGGGAGGCGGAGCTTGCAGTGAGCCGAGATTGCGCCACTGCACTCCCGCCTGGGCCACAGAGCGAGACTCCGTCTCAAAAAAAAAAAAAAAAAAAAAA	NA06986,NA06994,NA07000,NA07037,NA07051,NA07346,NA07347,NA07357,NA10847,NA10851,NA11829,NA11830,NA11831,NA11881,NA11894,NA11918,NA11919,NA11920,NA11931,NA11992,NA11993,NA11994,NA11995,NA12003,NA12004,NA12043,NA12144,NA12154,NA12155,NA12249,NA12287,NA12414,NA12489,NA12716,NA12717,NA12749,NA12750,NA12751,NA12761,NA12776,NA12813,NA12828,NA12878,NA12891,NA18486,NA18489,NA18498,NA18499,NA18501,NA18502…
1	79354663	.	1	.	ALU	-	INS	P1_MEI_26&P2_MEI_382	294	RP|SR	lowcov+trio	NA	.	CEU+YRI+CHB+JPT	0.67|0.79|0.85	51|39|46	68|62|78	.	.	Xing|GR2009|1104685761440	6	128	243	MEI_SR,MEI_RP	80	.	AluYb9	TTTTTTTTTTTTTTTTTGTTAGACGGAGTCTCGCTCTGTCGCCCAGGCGGGACTGCGGACTGCAGTGGCGCAATCTCGGCTCACTGCAAGCTCCGCTTCCCGGGTTCACGCCATTCTCCTGCCTCAGCCTCCCCAGTAGCTGGGACTACAGGCGCCCGCCACCGGCGCCCGGCTAATTTTTTGTATTTTTAGTAGAGACGGGGTTTCACCTTGTTAGCCAGGATGGTCTCGATCTCCTGACCTCATGATCCACCCGCCTCGGCCTCCCCAAAGTGCTGGGATTACAGGCGTGAGCCACCGCGCCCGGCC	NA06986,NA07000,NA07037,NA07346,NA07357,NA10847,NA10851,NA11830,NA11831,NA11840,NA11881,NA11894,NA11918,NA11919,NA11920,NA11994,NA11995,NA12003,NA12004,NA12006,NA12043,NA12044,NA12045,NA12144,NA12154,NA12155,NA12156,NA12234,NA12249,NA12414,NA12489,NA12716,NA12717,NA12750,NA12751,NA12761,NA12763,NA12776,NA12814,NA12815,NA12828,NA12872,NA12873,NA12878,NA12891,NA12892,NA18489,NA18498,NA18501,NA18504…
1	79886760	79887077	1	1	ALU	-	DEL	P1_M_061510_1_215&P2_M_061510_1_377	317	SR,RP	lowcov+trio	val	ASM	CEU+YRI+CHB+JPT	0.55|0.79|0.98	43|48|56	47|76|110	esv3566	.	.	13	.	.	wtsi,bc_deletion,broad,washu,WASHU_RP,YALEU_SR,BC_RP,WTSI_RP	.	.	AluYa5	TTTTTTTTTTTTTTTTTTTTTTTTGAGACGGAGTCTCGCTCTGTCGCCCAGGCTGGAGTGCAGTGGCGGGATCTCGGCTCACTGCAAGCTCCGCCTCCCGGGTTCACGCCATTCTCCCGCCTCAGCCTCCCAAGTAGCTGGGACTACAGGCGCCCGCCACTACGCCTGGCTAATTTTTTGTATTTTTAGTAGAGACGGGGTTTCACCGTTTTAGCCGGGATGGTCTCGATCTCCTGACCTCGTGATCCGCCCGCCTCGGCCTCCCAAAGTGCTGGGATTACAGGCGTGAGCCACCGCGCCCGGCC	NA06994,NA07000,NA07051,NA07347,NA10847,NA10851,NA11830,NA11831,NA11881,NA11918,NA11919,NA11920,NA11931,NA11992,NA11993,NA12003,NA12004,NA12043,NA12044,NA12045,NA12144,NA12154,NA12156,NA12489,NA12716,NA12717,NA12749,NA12751,NA12761,NA12813,NA12828,NA12878,NA12892,NA18489,NA18498,NA18502,NA18507,NA18508,NA18516,NA18542,NA18562,NA18582,NA18592,NA18609,NA18856,NA18858,NA18907,NA18912,NA18916,NA18945…
1	80071686	.	1	.	ALU	-	INS	P1_MEI_27&P2_MEI_383	255	RP|SR	lowcov+trio	val	PCR	YRI+CHB+JPT	.|0.09|0.04	0|39|45	0|7|4	.	.	Xing|GR2009|1104685761267	9	37	58	MEI_SR,MEI_RP	80	.	AluYb9	TTTTTTGTTTTTTTTTTGTTTTTTTTTTTTGTAGACGGAGTCTCGCTCTGTCGCCCAGGCTGGACTGCGGACTGCAGTGGCGCAATCTCGGCTCACTGCAAGCTCCGCTTCCCGGGTTCACGCCATTCTCCTGCCTCAGCCTCCCCAGTAGCTGGGACTACAGGCGCCCGCCACCGCGCCCGGCTAATTTTCTGTATTTTTAGTAGAGACGGGGTTTCACCTTGTTAGCCAGGATGGTCTCGATCTCCTGACCTCATGATCCACCCGCCTCGGCC	NA06986,NA07000,NA07051,NA07346,NA10851,NA11830,NA11831,NA11840,NA11920,NA11993,NA11994,NA12003,NA12004,NA12044,NA12045,NA12234,NA12287,NA12489,NA12716,NA12717,NA12751,NA12761,NA12776,NA12812,NA12878,NA12891,NA12892,NA18501,NA18502,NA18517,NA18576,NA18592,NA18949,NA18964,NA19102,NA19114,NA19138
1	80776796	.	7	.	ALU	+	INS	P1_MEI_1372&P2_MEI_384	103	RP|SR	lowcov+trio	NA	.	YRI	0.00|0.05|0.00	42|40|43	0|4|0	.	.	.	18	4	3	MEI_SR,MEI_RP	54	GENE|AL136234.1|ENSG00000224326			NA18510,NA18517,NA18909,NA19239,NA19240
1	80780662	.	55	.	ALU	-	INS	P1_MEI_1373	180	RP	lowcov	NA	.	YRI	0.00|0.05|0.00	43|41|41	0|4|0	.	.	.	.	2	3	MEI_RP	10	GENE|AL136234.1|ENSG00000224326			NA18510,NA18912,NA19172
1	80966929	80967256	1	1	ALU	+	DEL	P1_M_061510_1_217&P2_M_061510_1_378	327	SR,RP	lowcov+trio	val	ASM	CEU+YRI+CHB+JPT	0.60|0.35|0.44	43|48|53	52|34|47	esv5102	.	.	12	.	.	pindel_D,wtsi,bc_deletion,washu,UWASH_RP,PINDEL_SR,BC_RP,YALEU_SR,WTSI_RP,WASHU_RP	.	.	AluYa5	GTGGCCGGGCGCGGTGGCTCACGCCTGTAGTCCCAGCACTTTGGGAGGCCGAGGCGGGCGGATCACGAGGTCAGGAGATCGAGACCATCCCGGCTAAAACGGTGAAACCCCGTCTCTACTAAAAATACAAAAAATTAGCCGGGCGTAGTGGCGGGCGCCTGTAGTCCCAGCTACTAGGGAGGCTGAGGCAGGAGAATGGTGTGAACCCGGGAGGCGGAGCTTGCAGTGAGCCGAGATCGCGCCACTGCACTCCAGCCTGGGCGACAGAGCGAGACTCCGTCTCAAAAAAAAAAAAAAAAAAAAAAAAAAAAAAAAA	NA06986,NA07000,NA07051,NA07346,NA07357,NA11829,NA11831,NA11918,NA11920,NA11993,NA12004,NA12005,NA12045,NA12154,NA12156,NA12414,NA12489,NA12716,NA12717,NA12751,NA12761,NA12763,NA12891,NA12892,NA18501,NA18502,NA18504,NA18505,NA18510,NA18511,NA18516,NA18517,NA18519,NA18523,NA18532,NA18537,NA18545,NA18547,NA18550,NA18555,NA18558,NA18561,NA18566,NA18570,NA18572,NA18573,NA18576,NA18577,NA18579,NA18582…
1	81124116	.	1	.	ALU	+	INS	P1_MEI_28&P2_MEI_1372	108	RP|SR	lowcov+trio	val	PCR	CEU+YRI	0.16|0.12|.	51|43|0	16|10|0	.	dbRIP_Alu_00478	.	4	64	57	MEI_SR,MEI_RP	5	.	AluYa8	GCTACTTGGGAGGCTGAGGCAGGAGAATGGCGTGAACCCCGGGAGGCGGAGGCTTGCAGTGAGCCGAGATCCCGCCACTGCACTCCAGCCTGGGGCGACAGAGCGAGACTCCGTCTAACAAAAAAAAAAAAAAAAAAAAGAAAA	NA06986,NA07000,NA07037,NA07347,NA11831,NA11881,NA11894,NA11920,NA12004,NA12045,NA12156,NA12234,NA12249,NA12489,NA12716,NA12750,NA12751,NA12814,NA18501,NA18508,NA18517,NA18519,NA18523,NA18526,NA18537,NA18542,NA18562,NA18570,NA18571,NA18577,NA18579,NA18592,NA18603,NA18608,NA18870,NA18907,NA18942,NA18947,NA18948,NA18949,NA18951,NA18959,NA18960,NA18964,NA18965,NA18970,NA18973,NA19114,NA19143,NA19238
1	81177364	81183536	44	28	L1	-	DEL	P1_M_061510_1_218&P2_M_061510_1_379	6172	RP	lowcov+trio	NA	.	CEU+YRI+CHB+JPT	0.50|0.43|0.81	36|37|57	36|32|92	esv3369	.	.	.	.	.	broad,bc_deletion,UWASH_RP,WTSI_RP,YALEU_SR,BC_RP	.	.	L1HS	TTTTTTTTTTTTTTTTTTTTTTTTTTTTTTTTTTTAATTATATATTTTTCTTTATTTGTTTTTCACTTAACATTGTATCAGGACCATATCATTAAAATTTTTTGAACATTTAATTTTTTTTTTTTTTTTATTTTTTATTTTATTTTTTATTTTTTTGTTATACTCTAAGTTTTAGGGTACATGTGCACATTGTGCAGGTTAGTTACATATGTATACATGTGCCATGCTGGTGCGCTGCACCCACTAACGTGTCATCTAGCATTAGGTATATCTCCCAATGCTATCCCTCCCCCCTCCCCCGACCCCACCACAGTCCCCAGAGTGTGATATTCCCCTTCCTGTGTCCATGTGATCTCATTGTTCAATTCCCACTTATGAGTGAGAATATGCGGTGTTTGG…	NA06994,NA07000,NA07037,NA07051,NA07346,NA07347,NA07357,NA10847,NA10851,NA11829,NA11830,NA11894,NA11918,NA11919,NA11995,NA12003,NA12004,NA12006,NA12044,NA12045,NA12144,NA12154,NA12156,NA12249,NA12287,NA12489,NA12716,NA12717,NA12749,NA12750,NA12761,NA12763,NA12776,NA12813,NA12828,NA12878,NA12891,NA12892,NA18486,NA18489,NA18498,NA18501,NA18502,NA18505,NA18507,NA18508,NA18510,NA18511,NA18516,NA18519…
1	81296703	.	1	.	ALU	-	INS	P1_MEI_29&P2_MEI_385	299	RP|SR	lowcov+trio	val	PCR	CEU+YRI+CHB+JPT	0.26|0.17|0.06	51|41|39	27|14|5	.	.	Iskow|CELL2010|FSTNXB304INGGJ	20	53	61	MEI_SR,MEI_RP	80	.	AluYa5	TTTTTTTTTTTTTTTTTTTTTTGTAGACGGAGTCTCGTCTCTGTCGCCCAGGCTGGAGTGCAGTGGCGGGATCTCGGCTCACTGCAAGCTCCGCCTCCCGGGTTCACGCCATTCTCCTGCCTCAGTTCCTTCCCAAGTAGCTGGGACTACAGGCGCCCGCCACTACGCCCGGGCTAATTTTTTGTATTTTTAGTAGAGACGGGGGTTTCACCCGTTTTTAGCCGGGATGGTCTCGATCTCCTGACCTCGTGACTCCGCCCGCCTCGGCCTCCCAAAGTGCTGGGGATTACAGGCGTGAGCCACCGCGCCCGGCC	NA06986,NA07037,NA07346,NA07347,NA07357,NA10847,NA10851,NA11840,NA11881,NA11919,NA11992,NA11994,NA12003,NA12004,NA12043,NA12044,NA12154,NA12716,NA12717,NA12761,NA12812,NA12814,NA12815,NA12872,NA12873,NA12874,NA12878,NA12891,NA12892,NA18507,NA18510,NA18511,NA18519,NA18558,NA18572,NA18603,NA18871,NA18907,NA18944,NA19099,NA19129,NA19138,NA19147,NA19172
1	81460372	81460701	1	1	ALU	+	DEL	P1_M_061510_1_219&P2_M_061510_1_380	329	AS,SR,RP	lowcov+trio	val	ASM	CEU+YRI+CHB+JPT	0.59|0.24|0.23	38|25|37	45|12|17	esv3207	.	.	12	.	.	bc_deletion,wtsi,washu,pindel_D,broad,WTSI_RP,WASHU_RP,UWASH_RP,PINDEL_SR,BC_RP,YALEU_SR,OXFDU_AS	.	.	AluYb8	AGGGCCGGGCGCGGTGGCTCACGCCTGTAATCCCAGCACTTTGGGAGGCCGAGGCGGGTGGATCATGAGGTCAGGAGATCGAGACCATCCTGGCTAACAAGGTGAAACCCCGTCTCTACTAAAAATACAAAAAATTAGCCGGGCGCGGTGGCGGGCGCCTGTAGTCCCAGCTACTCGGGAGGCTGAGGCAGGAGAATGGCGTGAACCCGGGAAGCGGAGCTTGCAGTGAGCCGAGATTGCGCCACTGCAGTCCGCAGTCCGACCTGGGCGACAGAGCGAGACTCCGTCTCAAAAAAAAAAAAAAAAAAAAAAAAAAAA	NA06986,NA06994,NA07051,NA07346,NA07347,NA07357,NA10847,NA10851,NA11831,NA11881,NA11894,NA11918,NA11919,NA11920,NA11931,NA11993,NA11995,NA12003,NA12005,NA12006,NA12043,NA12044,NA12045,NA12154,NA12155,NA12156,NA12249,NA12287,NA12414,NA12489,NA12749,NA12750,NA12751,NA12763,NA12776,NA12813,NA12828,NA12878,NA12892,NA18486,NA18489,NA18498,NA18499,NA18501,NA18502,NA18504,NA18505,NA18507,NA18508,NA18510…
1	81628374	.	7	.	L1	+	INS	P1_MEI_3319&P2_MEI_2240	.	SR	lowcov+trio	NA	.	CEU	0.25|.|.	16|0|0	8|0|0	.	.	.	.	11	0	MEI_SR	23	GENE|LPHN2|ENSG00000117114			NA07346,NA11840,NA11881,NA11894,NA12043,NA12814,NA12872,NA12878,NA18970,NA19240
1	82084629	.	1	.	ALU	+	INS	P1_MEI_30&P2_MEI_386	299	RP|SR	lowcov+trio	val	PCR	CEU+YRI	0.28|0.26|0.00	49|43|39	27|22|0	.	.	.	11	51	40	MEI_SR,MEI_RP	80	GENE|LPHN2|ENSG00000117114	AluYb8	GGCCGGGCGCGGTGGCGTCACGCCTGTAATCCCAGCACTTTGGGAGGCCGAGGCGGGTGGATCATGAGGTCAGGAGATCGAGACCATCCTGGTTAACAAGGTGAAACCCCGTCTCTACTAAAAAATACAAAAAAATTAGCCGGGCGCGGTGGCGGGCGCCTGTAGTCCCAGCTACTCGGGAGGCTGAGGCAGGAGAATGGCGTGAACCCGGGAAGCGGAGCTTGCAGTGAGCCGAGATTGCGCCACTGCAGTCCGCAGTCCGGCCTGGGCGACAGAGCGAGACTCCGTCTCAAAAAAAAAANAAAAAAAAAAAAAGAA	NA07000,NA07037,NA07051,NA07346,NA07357,NA10851,NA11829,NA11831,NA11840,NA11881,NA11931,NA12003,NA12006,NA12045,NA12144,NA12154,NA12156,NA12234,NA12414,NA12717,NA12749,NA12761,NA12776,NA18498,NA18501,NA18502,NA18504,NA18508,NA18519,NA18858,NA18861,NA18870,NA18912,NA18916,NA19093,NA19099,NA19114,NA19129,NA19138,NA19239,NA19240,NA19257
1	82735879	82736203	1	1	ALU	-	DEL	P1_M_061510_1_221&P2_M_061510_1_382	324	RP,SR	lowcov+trio	val	PCR,ASM	CEU+YRI+CHB+JPT	0.68|0.43|0.79	44|35|56	60|30|89	.	.	.	13	.	.	washu,bc_deletion,wtsi,broad,pindel_D,YALEU_SR,PINDEL_SR,UWASH_RP,WTSI_RP,BC_RP,WASHU_RP	.	.	AluYa5	TTTTTTTTTTTTTTTTTTTTTTTTTTTTTTGAGACGGAGTCTCGCTCTGTCGCCCAGGCTGGAGTGCAGTGGCGGGATCTCGGCTCACTGCAAGCTCCGCCTCCCGGGTTCACGCCATTCTCCTGCCTCAGCCTCCCAAGTAGCTGGGACTACAGGCGCCCGCCACTACGCCCGGCTAATTTTTTTGTATTTTTAGTAGAGACGGGGTTTCACCGTTTTAGCCGGGATGGCCTCGATCTCCTGACCTCGTGATCCGCCCGCCTCGGCCTCCCAAAGTGCTGGGATTACAGGCGTGAGCCACCGCGCCCGGCC	NA06986,NA06994,NA07037,NA07346,NA07357,NA10847,NA10851,NA11830,NA11881,NA11894,NA11918,NA11992,NA11993,NA11994,NA11995,NA12003,NA12043,NA12044,NA12144,NA12155,NA12717,NA12761,NA12813,NA12828,NA12878,NA12891,NA18486,NA18489,NA18498,NA18499,NA18501,NA18502,NA18504,NA18505,NA18508,NA18510,NA18511,NA18516,NA18519,NA18520,NA18522,NA18523,NA18526,NA18532,NA18542,NA18547,NA18552,NA18561,NA18566,NA18576…
1	82815232	82815552	1	1	ALU	-	DEL	P1_M_061510_1_222&P2_M_061510_1_383	320	SR,RP	lowcov+trio	val	PCR,ASM	CEU+YRI	0.52|0.21|.	29|33|0	30|14|0	esv2805	.	.	10	.	.	pindel_D,bc_deletion,washu,WTSI_RP,BC_RP,PINDEL_SR,YALEU_SR,UWASH_RP	.	.	AluYa5	TTTTTTTTTTTTTTTTTTTTTTTTTTTTTTGAGACGGAGTCTCGCTCTGTCGCCCAGGCTGGAGTGCAGTGGCGGGATCTCGGCTCACTGCAAGCTCCGCCTCCCGGGTTCACGCCATTCTCCCGCCTCAGCCTCCCAAGTAGCTGGGACTACAGGCGCCCGCCACTACGCCCGGCTAATTTTTTGTATTTTTAGTAGAGACGGGGTTTCACCGTTTTAGCCGGGATGGTCTCGATCTCCTGACCTCGTGATCCGCCCGCCTCGGCCTCCCAAAGTGCTGGGATTACAGGCGTGAGCCACCGCGCCCGGCC	NA06986,NA07037,NA07347,NA10847,NA10851,NA11830,NA11831,NA11919,NA11920,NA11931,NA11994,NA12003,NA12004,NA12044,NA12045,NA12154,NA12155,NA12249,NA12749,NA12750,NA12761,NA12763,NA18489,NA18501,NA18502,NA18505,NA18507,NA18508,NA18510,NA18511,NA18516,NA18517,NA18519,NA18520,NA18522,NA18523,NA18526,NA18532,NA18537,NA18545,NA18547,NA18550,NA18555,NA18561,NA18562,NA18564,NA18566,NA18570,NA18572,NA18573…
1	82845599	.	10	.	SVA	+	INS	P1_MEI_3320	.	SR	lowcov	NA	.	CEU	0.03|.|.	17|0|0	1|0|0	.	.	.	.	0	1	MEI_SR	4	.			NA12812
1	82898546	82900157	1	1	L1	+	DEL	P2_M_061510_1_71	1611	SR,RP	trio	val	ASM	.	0.00|.|.	28|0|0	0|0|0	esv4307	.	.	18	.	.	WASHU_RP,PINDEL_SR,WTSI_RP,BC_RP,UWASH_RP,AB_RP	.	.	L1HS	CACCAAAAAAGAGCCCGCATTGCCAAGTCAATCCTAAGCCAAAAGAACAAAGCTGGAGGCATCACACTACCTGACTTCAAACTATACTACAAGGCTACAGTAACCAAAACAGCATGGTACTGGTACCAAAACAGAGATATAGATCAATGGAACAGAACAGAGCCCTCAGAAATAATGCCGCATATCTACAACTATCTGATCTTTGACAAACCTGAGAAAAACAAGCAATGGGGAAAGGATTCCCTATTTAATAAATGGTGCTGGGAAAACTGGCTAGCCATATGTAGAAAGCTGAAACTGGATCCCTTCCTTACACCTTATACAAAAATCAATTCAAGATGGATTAAAGATTTAAACGTTAAACCTAAAACCATAAAAACCCTAGAAGAAAACCTAGGC…	NA12878,NA12891,NA12892,NA19239,NA19240
1	83842661	.	12	.	ALU	+	INS	P1_MEI_1374&P2_MEI_1374	131	RP	lowcov+trio	NA	.	.	0.00|.|0.00	36|0|25	0|0|0	.	.	.	9	4	9	MEI_RP	65	GENE|AC098654.1|ENSG00000233008			NA18502,NA18504,NA18861,NA19093,NA19172,NA19190,NA19238,NA19240
1	84685822	.	5	.	ALU	+	INS	P1_MEI_3321	327	SR	lowcov	NA	.	CEU	0.46|.|.	14|0|0	13|0|0	.	.	Xing|GR2009|1104685460278	39	1	11	MEI_SR	28	.			NA12043,NA11894,NA07346,NA11881,NA12249,NA12812,NA12872,NA12873
1	84827142	.	10	.	ALU	-	INS	P1_MEI_1375&P2_MEI_1375	231	RP	lowcov+trio	val	PCR	YRI	0.00|0.06|0.00	43|40|47	0|5|0	.	.	.	8	2	6	MEI_RP	56	.			NA18523,NA18870,NA19093,NA19238,NA19239,NA19240
1	85164975	.	10	.	ALU	+	INS	P1_MEI_3322	.	SR	lowcov	NA	.	.	0.00|.|.	15|0|0	0|0|0	.	.	.	.	0	1	MEI_SR	4	CDS|MCOLN2|ENSG00000153898			NA19141
1	85521208	85521538	1	1	ALU	-	DEL	P1_M_061510_1_228&P2_M_061510_1_390	330	AS,SR,RP	lowcov+trio	val	PCR,ASM	CEU+YRI+CHB+JPT	0.24|0.17|0.26	44|49|47	21|17|24	esv3232	.	.	14	.	.	washu,wtsi,pindel_D,broad,bc_deletion,WTSI_RP,UWASH_RP,YALEU_SR,PINDEL_SR,OXFDU_AS,WASHU_RP,BC_RP	.	GENE|AL360219.1|ENSG00000223653	AluYb8	TTTTTTTTTTTTTTTTTTTTTTTTTTTGAGACGGAGTCTCGCTCTGTCGCCCAGGCCGGACTGCGGACTGCAGTGGCGCAATCTCAGCTCACTGCAAGCTCCGCTTCCCGGGTTCACGCCATTCTCCTGCCTCAGCCTCCCGAGTAGCTGGGACTACAGGCGCCCGCCACCGCGCCCGGCTAATTTTTTGTATTTTTTTAGTAGAGACGGGGTTTCACCTTGTTAGCCAGGATGGTCTCGATCTCCTGACCTCATGATCCACCCGCCTCGGCCTCCCAAAGTGCTGGGATTACAGGCGTGAGCCACCGCGCCCGGCC	NA06986,NA06994,NA07000,NA07037,NA07051,NA07346,NA07347,NA07357,NA10847,NA10851,NA11829,NA11830,NA11831,NA11881,NA11894,NA11918,NA11919,NA11920,NA11993,NA11994,NA11995,NA12003,NA12004,NA12005,NA12006,NA12043,NA12044,NA12045,NA12144,NA12154,NA12155,NA12156,NA12249,NA12287,NA12414,NA12489,NA12716,NA12749,NA12750,NA12751,NA12761,NA12763,NA12813,NA12828,NA12878,NA12891,NA12892,NA18486,NA18489,NA18499…
1	86178378	86178706	1	1	ALU	+	DEL	P1_M_061510_1_230&P2_M_061510_1_392	328	SR,RP	lowcov+trio	val	ASM	CEU+YRI	0.34|0.42|.	34|39|0	23|33|0	esv3715	.	.	15	.	.	wtsi,washu,pindel_D,bc_deletion,WTSI_RP,UWASH_RP,BC_RP,WASHU_RP,PINDEL_SR	.	GENE|COL24A1|ENSG00000171502	AluY	GGGCCGGGCGCGGTGGCTCACGCCTGTAATCCCAGCACTTTGGGAGGCCGAGGCGGGCGGATCACGAGGTCAGGAGATCGAGACCATCCTGGCTAACACGGTGAAACCCCGTCTCTACTAAAAATACAAAAAATTAGCCGGGCGTGGTAGCGGGCGCCTGTAGTCCCAGCTACTCGGGAGGCTGAGGCAGGAGAATGGCGTGAACCCGGGAGGCGGAGCTTGCAGTGAGCCGAGATCGCGCCACTGCACTCCAGCCTGGGCGACAGAGCGAGACTCCGTCTCAAAAAAAAAAAAAAAAAAAAAAAAAAAAAAAA	NA06986,NA07000,NA07037,NA07051,NA07346,NA07357,NA10847,NA10851,NA11829,NA11830,NA11831,NA11881,NA11894,NA11918,NA11919,NA11920,NA11992,NA11993,NA11994,NA11995,NA12003,NA12004,NA12005,NA12043,NA12044,NA12045,NA12144,NA12154,NA12155,NA12156,NA12249,NA12287,NA12414,NA12489,NA12716,NA12717,NA12750,NA12761,NA12763,NA12776,NA12828,NA12891,NA18489,NA18498,NA18499,NA18501,NA18502,NA18504,NA18505,NA18508…
1	86453313	86455611	1	1	SVA	+	DEL	P1_M_061510_1_231&P2_M_061510_1_393	2298	SR,RP	lowcov+trio	val	ASM	CEU+YRI+CHB+JPT	0.97|0.92|1.00	44|53|56	85|98|112	.	.	.	15	.	.	yale_solid,washu,pindel_D,bc_deletion,wtsi,UWASH_RP,BC_RP,WTSI_RP	.	.	SVA_F	GGATCCTCCCCCTCCCCCTCCCCCTCCCCCTCCCCCTCCCCCTCCCCCTCCCCCTCTCCCTCCCCCTCTCCCTCTCCCTCTCCCCACGGTCTCCCTCTCATGCGGAGCCGAAGCTGGACTGTACTGCTGCCATCTCGGCTCACTGCAACCTCCCTGCCTGATTCTCCTGCCTCAGTCTGCCGAATGCCTGCGATTGCAGGCACGCGCCGCCACGCCTGACTGGTTTTGGTGGAGACGGGGTTTCGCTGTGTTGGCCGGGCCGGTCTCCAGCCCCTAACCGCGAGTGATCCGCCAACCTCGGCCTCCCGAGGTGCCGGGATTGCAGACGGAGTCTCGTTCACTCAGTGCTCAATGGTGCCCAGGCTGGAGTGCAGTGGCGTGATCTCGGCTCACTACAAC…	NA06994,NA12044,NA12813,NA18502,NA18510,NA18861,NA18948,NA19093,NA19147,NA19190,NA19238,NA19257,NA19238
1	86469525	.	22	.	ALU	-	INS	P1_MEI_1376	170	RP	lowcov	NA	.	.	0.00|0.00|.	43|43|0	0|0|0	.	.	.	4	9	14	MEI_RP	40	.			NA18537,NA18558,NA18571,NA18577,NA18638,NA18952,NA18960
1	86513568	86514285	1	1	L1	+	DEL	P1_M_061510_1_232&P2_M_061510_1_394	717	SR,RP	lowcov+trio	val	ASM	CEU+YRI+CHB+JPT	0.40|0.12|0.06	40|30|44	32|7|5	esv4649	.	.	6	.	.	wtsi,pindel_D,broad,bc_deletion,washu,BC_RP,WTSI_RP,UWASH_RP,PINDEL_SR,WASHU_RP	.	.	L1HS	TACACCAGTTAGAATGGCAATCATTAAAAAGTCAGGAAACAACAGGTGCTGGAGAGGATGCGGAGAAATAGGAACACTTTTACACTGTTGGTGGGACTGTAAACTAGTTCAACCATTGTGGAAGTCAGTGTGGCGATTCCTCAGGGATCTAGAACTAGAAATACCATTTGACCCAGCCATCCCATTACTGGGTATATACCCAAATGAGTATAAATCATGCTGCTATAAAGACACATGCACACGTATGTTTATTGCGGCACTATTCACAATAGCAAAGACTTGGAACCAACCCAAATGTCCAACAATGATAGACTGGATTAAGAAAATGTGGCACATATACACCATGGAATACTATGCAGCCATAAAAAATGATGAGTTCATATCCTTTGTAGGGACATG…	NA06986,NA07000,NA07037,NA07051,NA07346,NA07347,NA07357,NA10847,NA10851,NA11829,NA11881,NA11918,NA11919,NA11920,NA11992,NA11994,NA11995,NA12003,NA12004,NA12005,NA12006,NA12043,NA12044,NA12045,NA12144,NA12154,NA12155,NA12249,NA12287,NA12414,NA12489,NA12716,NA12717,NA12749,NA12761,NA12763,NA12776,NA12813,NA12828,NA12878,NA12891,NA18486,NA18489,NA18498,NA18499,NA18501,NA18502,NA18504,NA18505,NA18507…
1	86655019	86655340	1	1	ALU	-	DEL	P1_M_061510_1_234	321	RP	lowcov	val	ASM	CEU+YRI+CHB+JPT	0.99|1.00|0.88	40|53|57	79|106|100	.	.	.	16	.	.	bc_deletion,wtsi,washu	.	.	AluYa5	TTTTTTTTTTTTTTTTTTTTTTTTTTGAGACGGAGTCTCGCTCTGTCGCCCAGGCTGGAGTGCAGTGGCGGGATCTCGGCTCACTGCAAGCTCCGCCTCCCGGGTTCACGCCATTCTCCTGCCTCAGCCTCCCGAGTAGCTGGGACTACAGGCGCCCGCCACTACGCCCGGCTAATTTTTTGTATTTTTAGTAGAGACGGGGTTTCACCGTTTTAGCCGGGATGGTCTCGATCTCCTGACCTCGTGATCCGCCCGCCTCAGCCTCCCAAAGTGCTGGGATTACAGGCGTGAGCCACCGCGCCCGGC	NA07037,NA12144,NA18526,NA18537,NA18555,NA18571,NA18940,NA18944,NA18947,NA18960
1	87332142	.	34	.	ALU	-	INS	P1_MEI_1377	194	RP	lowcov	NA	.	YRI	0.00|0.06|0.00	43|40|46	0|5|0	.	.	.	.	3	5	MEI_RP	16	GENE|HS2ST1|ENSG00000153936			NA18507,NA18912,NA19147,NA19257
1	88586199	.	4	.	ALU	+	INS	P1_MEI_31&P2_MEI_1376	301	RP|SR	lowcov+trio	NA	.	.	.|.|.	0|0|0	0|0|0	.	.	.	14	10	41	MEI_SR,MEI_RP	80	.	AluYb9	GGCCGGGCGCGGTGGCTCACGCCTGTAATCCCAGCACTTTGGGAGGCCGAGGCGGGTGGATCATGAGGTCAGGAGATCGAGACCATCCTGGCTAACAAGGTGAAACCCCGTCTCTGCTAAAAAAATACAAAAAATTAGCCGGGCGCGGTGGCGGGCGCCTGTAGTCCCAGCTAACTACGGGAGGCTGAGGCAGGAGAATGGCGTGAACCCGGGAAGCGGAGCTTGCAGTGAGCCGAAATTGCGCCACTGCAGTCCGCAGTCCGACCTGGGCGACAGAGCGAGACTCCGTCTCAAAAAAAAAAAAAAAAAAAAAAAAGAAA	NA11831,NA11881,NA12045,NA12749,NA12814,NA12878,NA12892,NA18526,NA18537,NA18542,NA18545,NA18550,NA18552,NA18570,NA18572,NA18576,NA18579,NA18592,NA18609,NA18638,NA18909,NA18940,NA18945,NA18951,NA18952,NA18959,NA18961,NA18965,NA18980,NA19005,NA19239
1	88888305	.	13	.	ALU	+	INS	P1_MEI_1378	257	RP	lowcov	NA	.	CEU+YRI+CHB+JPT	0.01|0.08|0.03	45|42|46	1|7|3	.	dbRIP_Alu_00253	.	6	19	10	MEI_RP	40	GENE|AC093578.3|ENSG00000237505			NA12750,NA18502,NA18510,NA18520,NA18523,NA18566,NA18609,NA19102,NA19147,NA19190
1	88991976	.	1	.	ALU	-	INS	P2_MEI_387	280	SR|RP	trio	val	PCR	.	.|.|.	0|0|0	0|0|0	.	.	.	3	27	90	MEI_SR,MEI_RP	40	GENE|PKN2|ENSG00000065243	AluYb8	TTTTTTTTTTTTTTTTTTTTTTTTGAGACGGAGTCTCGCTCTGTCGCCCAGGTCGGACTGCGGACTGCAGTGGCGCAATCTCGGCTCACTGCAAGCTCCGCTTCCCGGGTTCACGCCATTCTCCTGCCTCAGCCTCCCGAGTAGCTGGGACTACAGGCGCCCGGCCACCGCGCCCGGCTAATTTTTTGTATTTTTAGTAGAGACGGGGTTTCACCTTGTTAGCCAGGATGGTCTCGATCTCCTGACCTCATGATCCACCCGCCTCGGCCTCCCAAAGTGCTGGGATTACAGGCGTGA	NA12878,NA12892,NA19238,NA19239,NA19240
1	89019682	.	26	.	ALU	+	INS	P1_MEI_1379&P2_MEI_1377	97	RP	lowcov+trio	NA	.	YRI	0.00|0.18|0.00	37|34|45	0|12|0	.	.	.	.	12	7	MEI_RP	7	GENE|PKN2|ENSG00000065243			NA18499,NA18511,NA18517,NA18907,NA18916,NA19093,NA19102,NA19108,NA19138,NA19238,NA19239
1	90143132	.	33	.	ALU	-	INS	P1_MEI_1380&P2_MEI_1378	48	RP	lowcov+trio	NA	.	YRI+CHB+JPT	.|0.01|0.01	0|43|48	0|1|1	.	.	.	.	7	15	MEI_RP	58	GENE|LRRC8D|ENSG00000171492			NA06986,NA07346,NA11830,NA11919,NA12004,NA12751,NA12761,NA18573,NA19238
1	90687085	.	7	.	L1	+	INS	P1_MEI_1381	1627	RP	lowcov	NA	.	CEU+CHB+JPT	0.02|.|0.44	44|0|49	2|0|43	.	.	.	18	93	13	MEI_RP	40	.			NA07000,NA18508,NA18510,NA18516,NA18523,NA18532,NA18545,NA18547,NA18558,NA18561,NA18562,NA18563,NA18564,NA18571,NA18573,NA18576,NA18577,NA18579,NA18593,NA18603,NA18605,NA18609,NA18853,NA18870,NA18909,NA18940,NA18942,NA18943,NA18947,NA18948,NA18949,NA18951,NA18956,NA18960,NA18961,NA18964,NA18965,NA18973,NA18980,NA19005,NA19093,NA19099,NA19114,NA19257
1	91397359	91397642	1	1	ALU	+	DEL	P2_M_061510_1_398	283	AS,SR,RP	trio	val	ASM	CEU+YRI	0.03|0.11|0.00	38|42|55	2|9|0	esv3593	.	.	16	.	.	UWASH_RP,WASHU_RP,YALEU_SR,BC_RP,PINDEL_SR,OXFDU_AS	.	.	AluYa5	TCTTTGGGAGGCCGAGGCGGGCGGATCACGAGGTCAGGAGATCGAGACCATCCCGGCTAAAACGGTGAAACCCCGTCTCTACTAAAAATACGAAAAATTAGCCGGGCGTAGTGGCGGGCGCCTGTAGTCCCAGCTACTTGGGAGGCTGAGGCAGGAGAATGGCGTGAACCCGGGAGGCGGAGCTTGCAGTGAGCCGAGATCCCGCCACTGCACTCCAGCCTGGGCGACAGAGCGAGACTCCGTCTCAAAAAAAAAAAAAAAAAAAAAA	NA12878,NA12891,NA12892,NA19238,NA19239,NA19240
1	91686685	91687150	1	1	L1	+	DEL	P1_M_061510_1_239&P2_M_061510_1_74	455	SR,RP	lowcov+trio	val	ASM	CEU+YRI+CHB+JPT	0.42|0.49|0.48	44|48|57	37|47|55	esv3976	.	.	.	.	.	broad,wtsi,washu,bc_deletion,WTSI_RP,WASHU_RP,BC_RP,YALEU_SR,UWASH_RP,AB_RP	.	.	L1HS	TTAAAAAAAATGTTCACAATAGCAAAGACTTGGAACCAACCCAAATGTCCAACAATGATAGACTGGATTAAGAAAATGTGGCACATATACACCATGGAATACTATGCAGCCATTAAAAATGATGAGTTCATGTCCTTTGTAGGGACATGGATGAAATTGGAAACCATCATTCTCAGTAAACTATCGCAAGAACAAAAAACCAAACACCGCATATTCTCACTCATAGGTGGGAATTGAACAATGAGATCACATGGACACAGGAAGGGGAATATCACACTCTGGGGACTGTGGTGGGGTCGGGGGAGGGGGGAGGGATAGCATTGGGAGATATACCTAATGCTAGATGACACGTTAGTGGGTGCAGCGCACCAGCATGGCACATGTATACATATGTAACTA…	NA06986,NA06994,NA07037,NA07051,NA07346,NA10847,NA10851,NA11829,NA11830,NA11831,NA11881,NA11894,NA11918,NA11919,NA11920,NA11931,NA11994,NA12003,NA12004,NA12006,NA12044,NA12045,NA12144,NA12154,NA12155,NA12156,NA12249,NA12287,NA12489,NA12717,NA12750,NA12751,NA12761,NA12763,NA12776,NA12813,NA12828,NA12878,NA12891,NA12892,NA18486,NA18499,NA18501,NA18502,NA18504,NA18511,NA18519,NA18520,NA18526,NA18532…
1	91711575	.	98	.	L1	-	INS	P1_MEI_1382	50	RP	lowcov	inval	PCR	CEU+YRI	0.01|0.01|0.00	40|38|41	1|1|0	.	.	.	.	2	2	MEI_RP	8	.			NA12003,NA18853
1	92940104	.	4	.	ALU	-	INS	P1_MEI_3323&P2_MEI_388	309	RP|SR	lowcov+trio	NA	.	CEU	0.94|.|.	16|0|0	30|0|0	.	.	Xing|GR2009|1104685458125	30	35	1	MEI_SR,MEI_RP	80	GENE|EVI5|ENSG00000067208	AluYa5	TTTTTTTTTTTTTTTTTTTTTTTTTTTTGTAGACGGAGTCTCGCTCTGTCGCCCAGGCTGGAGTGCAGTGGCGGGATCTCGGCTCACTGCAAGCTCCGCCTCCCGGGTTCACGCCATTCTCCTGCCTCAGTCCTTCCCAAGTAGCTGGGACCACAGGCGCCCGCCACTACGCCCGGCTAATTTTTTGTATTTTTTTAGTAGAGACGGGGGTTTCACCGTTTTTAGCCGGGGATGGTCTCGATCTCCTGACCTCGTGATCCGCCCGCCTCGGCCTCCCAAAGTGCTGGGATTACAGGCGTGAGCCACCGCGCCCCGGCC	NA07347,NA11840,NA11881,NA11918,NA11931,NA12043,NA12045,NA12234,NA12287,NA12812,NA12814,NA12815,NA12873,NA12878,NA12891,NA12892,NA18970,NA19141,NA19143,NA19238,NA19239,NA19240
1	93270800	.	3	.	ALU	-	INS	P1_MEI_32&P2_MEI_389	302	RP|SR	lowcov+trio	NA	.	CEU+YRI+CHB+JPT	0.61|0.69|0.65	52|44|48	63|61|62	.	.	Xing|GR2009|1104685457968	19	159	263	MEI_SR,MEI_RP	80	.	AluYa5	TTTTCTTTTTCTTTTTTTTTTTTTTTTGTAGACGGAGTCTCGCTCTGTCGCCCCAGGCTGGAGTGCAGTGGCGGGATCTCGGCTCACTGCAAGCTCCGCCTCCCGGGTTCACGCCATTCTCCTGCCTCAGTCCTTTCCCTAAGTAGCTGGGACTACACGGCGCCCGCCACTACGCCCGGCTAATTTTTTTGTATTTTTTAGTTAGAGACGGGGGTTTCACCGTTTTTAGCTGGGATGGTCTCGATCTCCTGACCTCGTGATCCCGCCCGCCCTCGGCCTCCCCAAAGTGCTGGGATTACAGGCGTGAGCCACCGCGCCCGGCC	NA06986,NA07000,NA07037,NA07051,NA07346,NA07347,NA07357,NA10847,NA10851,NA11829,NA11830,NA11831,NA11840,NA11881,NA11894,NA11918,NA11919,NA11920,NA11931,NA11992,NA11993,NA11994,NA11995,NA12003,NA12004,NA12006,NA12043,NA12044,NA12045,NA12144,NA12154,NA12156,NA12249,NA12287,NA12414,NA12489,NA12716,NA12717,NA12749,NA12750,NA12751,NA12761,NA12763,NA12776,NA12812,NA12814,NA12815,NA12872,NA12873,NA12874…
1	94024046	94024359	1	1	ALU	+	DEL	P1_M_061510_1_242	313	SR,RP	lowcov	val	PCR,ASM	CEU+YRI+CHB+JPT	0.97|0.64|0.81	44|42|55	85|54|89	.	.	.	9	.	.	washu,wtsi,pindel_D,bc_deletion,broad	.	GENE|BCAR3|ENSG00000137936	AluY	CGGCCGGGCGCGGTGGCTCACGCCTGTAATCCCAGCACTTTGGGAGGCCGAGGCGGGCGGATCATGAGGTCAGGAGATCAAGACCATCCTGGCTAACACGGTGAAACCCCGTCTCTACTAAAAATACAAAAAATTAGCCGGGCGTGGTGGCGGGCGCCTGTAGTCCCAGCTACTCGGGAGGCTGAGGCAGGAGAATGGCGTGAACCCGGGAGGCGGAGCTTGCAGTGAGCCGAGATCGCGCCACTGCACTCCCGCCTGGGCGTCAGAGCGAGACTCCGTCTCAAAAAAAAAAAAAAAAAAAAAAA	NA06994,NA07357,NA10851,NA11881,NA11918,NA11919,NA11920,NA11931,NA11992,NA12044,NA12155,NA12156,NA12717,NA12751,NA12813,NA18489,NA18499,NA18501,NA18502,NA18505,NA18507,NA18508,NA18511,NA18517,NA18519,NA18520,NA18522,NA18523,NA18545,NA18555,NA18558,NA18561,NA18562,NA18572,NA18579,NA18582,NA18605,NA18608,NA18853,NA18856,NA18858,NA18861,NA18870,NA18871,NA18907,NA18916,NA18942,NA18943,NA18948,NA18951…
1	94147058	.	10	.	L1	+	INS	P1_MEI_3324	.	SR	lowcov	NA	.	.	.|.|.	0|0|0	0|0|0	.	.	.	.	0	1	MEI_SR	4	EXON|GCLM|ENSG00000023909			NA12814
1	95107815	.	10	.	ALU	+	INS	P1_MEI_3325	.	SR	lowcov	NA	.	CEU	0.08|.|.	13|0|0	2|0|0	.	.	.	.	0	1	MEI_SR	4	GENE|SLC44A3|ENSG00000143036			NA12249
1	95115274	.	7	.	ALU	+	INS	P1_MEI_33	57	SR|RP	lowcov	NA	.	CHB+JPT	.|0.00|0.19	0|37|47	0|0|18	.	.	Xing|GR2009|1104685457522	10	33	17	MEI_SR,MEI_RP	40	GENE|SLC44A3|ENSG00000143036			NA07347,NA11894,NA11919,NA11992,NA11994,NA11995,NA12003,NA12044,NA12414,NA12489,NA12717,NA12776,NA12815,NA18545,NA18547,NA18558,NA18563,NA18571,NA18572,NA18582,NA18603,NA18608,NA18609,NA18940,NA18943,NA18948,NA18969,NA18970,NA18973
1	95463098	95463417	1	1	ALU	+	DEL	P1_M_061510_1_243&P2_M_061510_1_403	319	RP,SR	lowcov+trio	val	ASM	CEU+YRI+CHB+JPT	0.11|0.23|0.29	32|32|36	7|15|21	esv4625	.	.	14	.	.	wtsi,bc_deletion,washu,pindel_D,PINDEL_SR,BC_RP,YALEU_SR,WTSI_RP,WASHU_RP,UWASH_RP	.	GENE|AC092802.4|ENSG00000226026	AluYa5	TGGCCGGGCGCGGTGGCTCACGCCTGTAATCCCAGCACTTTGGGAGGCCGAGGCGGGCGGATCACGAGGTCAGGAGATCGAGACCATCCCGGCTAAAAAACGGTGAAACCCCGTCTCTACTAAAAATACAAAAAATTAGCCGGGCGTAGTGGCGGGCGCCTGTAGTCCCAGCTACTCGGGAGGCTGAGGCAGGAGAATGGCGTGAACCCGGGAGGCGGAGCTTGCAGTGAGCCGAGATCCCGCCACTGCACTCCAGCCTGGGCGACAGAGCGAGACTCCGTCTCAAAAAAAAAAAAAAAAATAAAT	NA06986,NA07000,NA07037,NA07051,NA10847,NA10851,NA11829,NA11830,NA11881,NA11920,NA11992,NA12004,NA12043,NA12144,NA12154,NA12155,NA12249,NA12414,NA12716,NA12717,NA12750,NA12751,NA12761,NA12763,NA12776,NA12828,NA12891,NA12892,NA18498,NA18501,NA18502,NA18508,NA18510,NA18517,NA18520,NA18522,NA18523,NA18526,NA18532,NA18537,NA18542,NA18547,NA18552,NA18558,NA18561,NA18563,NA18564,NA18566,NA18570,NA18576…
1	95574433	.	5	.	L1	-	INS	P1_MEI_3326	.	SR	lowcov	val	PCR	CEU	0.27|.|.	11|0|0	6|0|0	.	.	Iskow|CELL2010|RI_20_4_34_G07	11	4	1	MEI_SR	20	.			NA11894,NA12812,NA11840,NA12234
1	96176343	.	12	.	ALU	-	INS	P1_MEI_1383	295	RP	lowcov	NA	.	YRI	0.00|0.16|0.00	38|38|47	0|12|0	.	.	.	12	11	13	MEI_RP	40	GENE|AL390121.1|ENSG00000237435			NA18499,NA18502,NA18507,NA18508,NA18520,NA18523,NA18870,NA18871,NA19093,NA19116,NA19225
1	96272858	.	26	.	ALU	-	INS	P2_MEI_1379	129	RP	trio	NA	.	.	.|.|.	0|0|0	0|0|0	.	.	.	.	6	13	MEI_RP	38	.			NA19238
1	97041708	.	23	.	ALU	-	INS	P1_MEI_1384	40	RP	lowcov	NA	.	YRI	0.00|0.06|0.00	40|39|43	0|5|0	.	.	.	5	2	5	MEI_RP	14	GENE|PTBP2|ENSG00000117569			NA18505,NA18507,NA18907,NA19108
1	97490215	.	10	.	ALU	-	INS	P1_MEI_34	289	SR|RP	lowcov	NA	.	CEU+YRI	0.08|0.03|0.00	50|45|49	8|3|0	.	.	.	.	11	13	MEI_SR,MEI_RP	40	GENE|DPYD|ENSG00000188641			NA11881,NA11918,NA11919,NA11931,NA12006,NA12045,NA12749,NA18489,NA18508,NA18871
1	97831599	.	83	.	ALU	+	INS	P1_MEI_1385	242	RP	lowcov	NA	.	YRI	0.00|0.04|0.00	39|38|46	0|3|0	.	.	.	.	4	2	MEI_RP	12	GENE|DPYD|ENSG00000188641			NA18501,NA18516
1	98377870	.	4	.	ALU	-	INS	P1_MEI_35&P2_MEI_1380	304	RP|SR	lowcov+trio	NA	.	CEU+YRI+CHB+JPT	0.20|0.37|0.30	48|42|46	19|31|28	.	dbRIP_Alu_00829	.	15	45	85	MEI_SR,MEI_RP	80	.	AluYb9	TTTTTTGTTTTTTTTTTTTTTTTTTTTTTTGTTTAGTACGGAGTCTCGCTCTGTTGCCCAGGCCGGACTGCGGACTGCAGTGGCGCAATCTCGGCTCACTGCAAGCTCCGCTTCCCGGGTTCACGCCATTCTCCTGCCTCAGCCTTCCCGAGTAGCTGGGACTACAGGCGCCCGCCACCGCGCCCGGCTAATTTTTTTGTATTTTTAGTAGAGACGGGGTTTCACCTTGTTAGCCAGGATGGTCTCGATCTCCTGACCTCATGATCCACCCGCCTCGGCCTCCCAAAGTGCTGGGATTACAGGCGTGAGCCACCGCGCCCGGCC	NA06986,NA07000,NA07357,NA11831,NA11881,NA11918,NA11919,NA11920,NA11992,NA12043,NA12044,NA12144,NA12156,NA12287,NA12761,NA12763,NA18489,NA18501,NA18502,NA18505,NA18508,NA18511,NA18517,NA18519,NA18520,NA18523,NA18532,NA18537,NA18547,NA18552,NA18555,NA18562,NA18564,NA18570,NA18572,NA18573,NA18577,NA18582,NA18592,NA18593,NA18608,NA18609,NA18638,NA18853,NA18861,NA18909,NA18947,NA18948,NA18951,NA18953…
1	99444688	.	10	.	ALU	-	INS	P2_MEI_390	278	SR|RP	trio	NA	.	.	.|.|.	0|0|0	0|0|0	.	.	.	.	25	13	MEI_SR,MEI_RP	40	.			NA19238,NA19239,NA19240
1	99471028	.	8	.	ALU	+	INS	P1_MEI_1386&P2_MEI_1381	54	RP	lowcov+trio	NA	.	YRI	0.00|0.08|0.00	41|42|47	0|7|0	.	.	.	13	8	2	MEI_RP	60	.			NA18508,NA18517,NA18519,NA19114,NA19225,NA19239,NA19240
1	99667119	.	8	.	ALU	+	INS	P1_MEI_1387&P2_MEI_391	182	RP|SR	lowcov+trio	NA	.	YRI	0.00|0.07|0.00	43|38|42	0|5|0	.	.	.	6	5	4	MEI_SR,MEI_RP	6	.			NA18510,NA18519,NA18909,NA19138,NA19239,NA19240
1	100128436	.	132	.	ALU	-	INS	P1_MEI_1388	199	RP	lowcov	NA	.	CEU	0.06|0.00|0.00	40|37|47	5|0|0	.	.	.	.	2	4	MEI_RP	12	GENE|AGL|ENSG00000162688			NA11831,NA12717,NA12751,NA12761
1	100324232	.	8	.	ALU	+	INS	P1_MEI_36&P2_MEI_1286	182	RP|SR	lowcov+trio	NA	.	CEU+YRI	0.02|0.10|0.00	50|42|50	2|8|0	.	.	.	21	15	11	MEI_SR,MEI_RP	60	GENE|SASS6|ENSG00000156876			NA10847,NA12045,NA18501,NA18504,NA18517,NA19099,NA19114,NA19147,NA19238,NA19257
1	100711192	.	10	.	ALU	-	INS	P2_MEI_2209	.	SR	trio	NA	.	.	.|.|.	0|0|0	0|0|0	.	.	.	.	1	0	MEI_SR	4	GENE|CDC14A|ENSG00000079335			NA19240
1	100766798	.	1	.	ALU	+	INS	P1_MEI_37&P2_MEI_324	296	RP|SR	lowcov+trio	NA	.	CEU+YRI+CHB+JPT	0.62|0.34|0.75	50|43|51	62|29|77	.	.	Xing|GR2009|1104685456225	8	220	150	MEI_SR,MEI_RP	80	.	AluYb9	GGCCGGGCGCGGTGGCGTCACGCCTGTAATCCCAGCACTTTGGGAGGCCGAGGCGGGTGGATCATGAGGTCAGGAGATCGAGACCATCCTGGCTAACAAGGTGAAACCCCCGTCTCTACTAAAAATACAAAAAATTAGCCGGGCGCGGTGGCGGGCGCCTGTAGTCCCAGCTACTGGGGAAGAACTGAGGCAGGAGAATGGCGTGAACCCGGGAAGCGGAGCTTGCAGTGAGCCGAGATTGCGCCACTGCAGTCCGCAGTCCGGCCTGGGCGACAGAGCGAGACTCCGTCTACAAAAAAAAAAAAAAAAAAAANAAAAAAAAA	NA06986,NA07000,NA07037,NA07051,NA07346,NA07347,NA07357,NA10847,NA10851,NA11829,NA11830,NA11831,NA11840,NA11894,NA11919,NA11920,NA11931,NA11992,NA11993,NA11994,NA12003,NA12004,NA12006,NA12043,NA12044,NA12045,NA12144,NA12154,NA12155,NA12234,NA12249,NA12414,NA12716,NA12717,NA12749,NA12750,NA12751,NA12761,NA12763,NA12776,NA12812,NA12828,NA12872,NA12874,NA12878,NA12891,NA12892,NA18489,NA18502,NA18504…
1	100939955	.	73	.	ALU	-	INS	P1_MEI_1389	232	RP	lowcov	NA	.	YRI	0.00|0.04|0.00	38|38|47	0|3|0	.	.	.	.	2	5	MEI_RP	14	.			NA18508,NA18858,NA19190
1	101161139	101161459	1	1	ALU	-	DEL	P1_M_061510_1_249&P2_M_061510_1_75	320	RP	lowcov+trio	val	ASM	CEU+YRI+CHB+JPT	0.84|0.86|0.89	44|42|57	74|72|102	esv5152	.	.	12	.	.	broad,wtsi,pindel_D,bc_deletion,BC_RP,UWASH_RP	.	GENE|SLC30A7|ENSG00000162695	AluYf4	TTTTTTTTTTTTTTTTTTTTTTTTTTTTTGAGACGGAGTCTCGCTGTCGCCCAGGCTGGAGTGCAGTGGCGCAATCTCGGCTCACTGCAGGCTCCGCCCCCTGGGGTTCACGCCATTCTCCTGCCTCAGCCTCCCGAGTAGCTGGGACTACAGGCGCCCGCCACCTCGCCCGGCTAATTTTTTGTATTTTTAGTAGAGACGGGGTTTCACCGTGTTAGCCAGGATGGTCTCGATCTCCTGACCTCGTGATCCGCCCGCCTCGGCCTCCCAAAGTGCTGGGATTACAGGCGTGAGCCACCGCGCCCAGCC	NA06994,NA07346,NA07357,NA10847,NA10851,NA11829,NA11830,NA11831,NA11931,NA11994,NA12003,NA12004,NA12006,NA12045,NA12155,NA12156,NA12287,NA12414,NA12716,NA12717,NA12749,NA12750,NA12751,NA12761,NA12763,NA12813,NA12828,NA12891,NA12892,NA18498,NA18499,NA18501,NA18504,NA18505,NA18508,NA18510,NA18511,NA18516,NA18532,NA18537,NA18542,NA18545,NA18547,NA18552,NA18555,NA18563,NA18566,NA18571,NA18573,NA18592…
1	101542647	.	11	.	ALU	+	INS	P1_MEI_1390&P2_MEI_1287	288	RP	lowcov+trio	NA	.	CEU+CHB+JPT	0.15|.|0.07	41|0|48	12|0|7	.	.	.	7	20	19	MEI_RP	60	.			NA06986,NA07037,NA11881,NA11920,NA11995,NA12044,NA12751,NA12891,NA12892,NA18517,NA18520,NA18526,NA18570,NA18573,NA18907,NA18944,NA18947,NA18965,NA19093,NA19114,NA19138
1	101587174	.	23	.	L1	+	INS	P2_MEI_2210	.	SR	trio	NA	.	.	.|.|.	0|0|0	0|0|0	.	.	.	.	.	.	MEI_SR	3	GENE|AL662904.1|ENSG00000231671			NA12878
1	102012738	.	13	.	ALU	+	INS	P1_MEI_1391	291	RP	lowcov	NA	.	YRI	0.00|0.14|0.00	42|37|44	0|10|0	.	.	.	17	6	10	MEI_RP	32	.			NA18517,NA18519,NA18907,NA18912,NA19093,NA19102,NA19116,NA19129,NA19147
1	102341496	.	5	.	L1	+	INS	P1_MEI_3327	6033	SR	lowcov	NA	.	.	.|.|.	0|0|0	0|0|0	.	.	Xing|GR2009|1104685455798	14	1	7	MEI_SR	26	.			NA12815,NA11840,NA07346,NA12812,NA12812,NA11840,NA07347
1	102693118	.	3	.	ALU	-	INS	P1_MEI_1392&P2_MEI_325	290	RP|SR	lowcov+trio	NA	.	CEU+YRI+CHB+JPT	0.07|0.35|0.07	42|42|43	6|29|6	.	.	.	22	20	55	MEI_SR,MEI_RP	80	.	AluYa5	TTTTATTTTATTTTAATTTTATTTTTTTTTTTTGTAGACGGAGTCTCGCTCTGTCGCCCAAGCTGGAGTGCAGTGGCGGGATCTCGGCTCACTGCAAGCTCCGCCTCCCGGGTTCACGCCATTCTCCTGCCTCAGCCTTCCCAAGTAGCTGGGACTACAGGCGCCCGCCACTACGCCCGGCTAATTTTTTGTATTTTTAGTAGAGACGGGGTTTCACCATTTTAGCCGGGATGGTCTCGATCTCCTGACCTCGTGATCCGCCCGCCTCGGCCTCCCAAAGTGCTGGGATTACAGGCGTGAGCCACCGCGCCCGGCC	NA10851,NA11894,NA11919,NA12750,NA12776,NA12891,NA18498,NA18499,NA18501,NA18504,NA18505,NA18517,NA18520,NA18550,NA18570,NA18572,NA18579,NA18853,NA18856,NA18861,NA18870,NA18907,NA18912,NA18916,NA18973,NA19099,NA19102,NA19108,NA19129,NA19138,NA19147,NA19172,NA19238,NA19239,NA19240
1	102820266	102820596	1	1	ALU	+	DEL	P1_M_061510_1_252&P2_M_061510_1_78	330	SR,AS,RP	lowcov+trio	val	ASM	CEU+YRI	0.07|0.20|.	37|43|0	5|17|0	esv4005	.	.	14	.	.	pindel_D,wtsi,bc_deletion,washu,WASHU_RP,OXFDU_AS,PINDEL_SR,WTSI_RP,YALEU_SR,BC_RP,UWASH_RP	.	.	AluY	CGGCCGGGCGCGGTGGCTCACGCCTGTAATCCCAGCACTTTGGGAGGCCGAGGCGGGCGGATCACGAGGTCAGGAGATCGAGACCATCCTGGCTAACACGGTGAAACCCCGTCTCTACTAAAAATACAAAAAATTAGCCGGGCGTAGTAGCGGGCGCCTGTAGTCCCAGCTACTCGGGAGGCTGAGGCAGGAGAATGGCGTGAACCCGGGAGGCGGAGCTTGCAGTGAGCCGAGATCGCGCCACTGCACTCCAGCCTGGGCGACAGAGCGAGACTCCGTCTCAAAAAAAAAAAAAAAAAAAAAAAAAAAAAAAAAAA	NA06986,NA07000,NA07037,NA07051,NA07346,NA07347,NA07357,NA10847,NA10851,NA11829,NA11830,NA11831,NA11881,NA11894,NA11918,NA11919,NA11920,NA11931,NA11992,NA11993,NA11994,NA11995,NA12003,NA12004,NA12005,NA12006,NA12043,NA12044,NA12045,NA12144,NA12154,NA12155,NA12156,NA12249,NA12287,NA12489,NA12716,NA12717,NA12749,NA12750,NA12751,NA12761,NA12763,NA12776,NA12828,NA12878,NA12891,NA12892,NA18486,NA18498…
1	102827049	.	55	.	ALU	+	INS	P1_MEI_1393&P2_MEI_1288	179	RP	lowcov+trio	NA	.	CEU+YRI	0.07|0.03|0.00	43|38|38	6|2|0	.	.	.	.	2	4	MEI_RP	3	.			NA11919,NA12750,NA12751,NA12776,NA12891,NA18508
1	102868653	102868972	1	1	ALU	-	DEL	P1_M_061510_1_253&P2_M_061510_1_79	319	RP,AS,SR	lowcov+trio	val	ASM	CEU+YRI+CHB+JPT	0.10|0.08|0.02	30|43|49	6|7|2	esv5235	.	.	15	.	.	pindel_D,washu,bc_deletion,wtsi,PINDEL_SR,OXFDU_AS,BC_RP,WTSI_RP,UWASH_RP,YALEU_SR,WASHU_RP	.	.	AluYa5	TTTTTTTTTTTTTTTTTTTTTTTTTGAGACCGAGTCTCGCTCTGTCGCCCAGGCTGGAGTGCAGTGGCGGGATCTCGGCTCACTGCAAGCTCCGCCTCCCGGGTTCACGCCATTCTCCCGCCTCAGCCTCCCAAGTAGCTGGGACTACAGGCGCCCGCCACTACGCCCGGCTAATTTTTTGTATTTTTAGTAGAGACGGGGTTTCACCGTTTTAGCCGGGATGGTCTCGATCTCCTGACCTCGTAATCCGCCCGCCTCGGCCTCCCAAAGTGCTGGGATTACAGGCGTGAGCCACCGCGCCCGGC	NA06986,NA07000,NA07037,NA07051,NA07346,NA07347,NA07357,NA10847,NA10851,NA11829,NA11830,NA11831,NA11881,NA11894,NA11918,NA11919,NA11920,NA11931,NA11992,NA11993,NA11995,NA12003,NA12004,NA12006,NA12043,NA12044,NA12144,NA12154,NA12155,NA12249,NA12287,NA12414,NA12489,NA12716,NA12717,NA12749,NA12750,NA12751,NA12761,NA12763,NA12776,NA12828,NA12878,NA12891,NA12892,NA18489,NA18498,NA18499,NA18501,NA18502…
1	103469072	.	29	.	ALU	-	INS	P1_MEI_1394&P2_MEI_1289	57	RP	lowcov+trio	NA	.	YRI	0.00|0.24|0.00	22|21|21	0|10|0	.	.	.	.	5	9	MEI_RP	68	.			NA18501,NA18519,NA18522,NA18907,NA18909,NA19093,NA19238,NA19240,NA19257
1	103491341	.	5	.	ALU	-	INS	P1_MEI_38	294	SR|RP	lowcov	NA	.	CEU	0.07|0.00|.	50|37|0	7|0|0	.	.	.	15	9	14	MEI_SR,MEI_RP	40	.			NA10847,NA11831,NA12003,NA12044,NA12750,NA12751,NA12814,NA12872,NA18547,NA18579,NA18582
1	104294542	.	20	.	ALU	-	INS	P1_MEI_1395&P2_MEI_1290	133	RP	lowcov+trio	NA	.	YRI	0.00|0.05|0.00	45|39|43	0|4|0	.	.	.	5	6	2	MEI_RP	6	.			NA18907,NA19108,NA19138,NA19239
1	104375991	.	1	.	ALU	-	INS	P1_MEI_39	301	SR|RP	lowcov	NA	.	YRI+CHB+JPT	.|0.14|0.16	0|39|45	0|11|14	.	.	Xing|GR2009|1104685271869	18	44	60	MEI_SR,MEI_RP	40	.			NA07037,NA07346,NA07357,NA10851,NA11829,NA11831,NA11894,NA11919,NA11992,NA12003,NA12006,NA12045,NA12144,NA12154,NA12249,NA12489,NA12716,NA12750,NA12751,NA12761,NA12776,NA12828,NA12872,NA12874,NA18505,NA18516,NA18522,NA18547,NA18563,NA18564,NA18576,NA18582,NA18603,NA18638,NA18856,NA18861,NA18943,NA18956,NA18960,NA18961,NA19093,NA19108,NA19114,NA19138,NA19257
1	104521370	104521687	1	1	ALU	+	DEL	P1_M_061510_1_581	317	SR,RP	lowcov	val	ASM	CEU+YRI+CHB+JPT	0.96|0.64|0.94	41|33|56	79|42|105	.	.	.	17	.	.	washu,broad,pindel_D	.	.	AluY	AGGACGGGCGCGGTGGCTCACGCCTGTAATCCCAGCACTTTGGGAGGCCGAGGCGGGCGGATCACGAGGTCAGGAGATCGAGACCATCCTGGCTAACACGGTGAAACCCCGTCTCTACTAAAAATACAAAAAATTAGCCGGGCGTGGTGGCGGGCGCCTGTAGTCCCAGCTACTCGGGAGGCTGAGGCAGGAGAATGGCGTGAACCCGGGAGGCGGAGCTTGCAGTGAGCCGAGATCGCGCCACTGCACTCCAGCCTGGGCGACAGAGCGAGACTCCGTCTCAAAAAAAAAAAAAGAAAGA	NA07357,NA11918,NA11919,NA11931,NA11993,NA12004,NA12144,NA12156,NA12751,NA12813,NA12878,NA12892,NA18486,NA18498,NA18499,NA18501,NA18502,NA18504,NA18505,NA18507,NA18508,NA18510,NA18511,NA18517,NA18520,NA18526,NA18550,NA18561,NA18563,NA18564,NA18571,NA18579,NA18593,NA18856,NA18858,NA18861,NA18870,NA18871,NA18907,NA18912,NA18916,NA18949,NA18953,NA18961,NA18967,NA18972,NA18980,NA19005,NA19098,NA19102…
1	104829739	.	8	.	L1	+	INS	P1_MEI_1396&P2_MEI_1291	100	RP	lowcov+trio	NA	.	YRI+CHB+JPT	.|0.17|0.04	0|43|47	0|15|4	.	.	.	12	38	16	MEI_RP	8	.			NA07037,NA11831,NA11881,NA11894,NA11920,NA12044,NA12749,NA18489,NA18501,NA18507,NA18508,NA18510,NA18564,NA18573,NA18959,NA19099,NA19102,NA19108,NA19138,NA19147,NA19225,NA19239,NA19240
1	104855592	.	3	.	ALU	+	INS	P1_MEI_40&P2_MEI_1292	257	RP|SR	lowcov+trio	val	PCR	CEU+YRI+CHB+JPT	0.24|0.35|0.53	55|40|47	26|28|50	.	dbRIP_Alu_01461	.	13	110	60	MEI_SR,MEI_RP	80	.	AluYa5	GGCCGGGCGCGGTGGCTCACGCCTGTAATCCCAGCACTTTGGGAGGCCGAGGCGGGCGGATCACGAGGTCAGGAGATCGAGACCATCCCGGCTAAAATGGTGAAACCCCGTCTCTACTAAAAATACAAAAAATTAGCCGGGCGTAGTGGCGGGCGCCTGTAGTCCCAGCTACTTGGGAGGCTGAGGCAGGAGAATGGCGTGAACCCGGGAGGCGGAGCTTGCAGTGAGCCGAGATCCCGCCACTGCACTCCAGCCTGGGCGACAGAGCGAGACTCCGTCTAACAAAAAAAAAAAAAAAAAAAAAAAAAAAAA	NA06986,NA07037,NA07051,NA10851,NA11830,NA11831,NA11881,NA11894,NA11918,NA11920,NA11993,NA11994,NA12004,NA12043,NA12044,NA12045,NA12144,NA12489,NA12776,NA12812,NA12872,NA12892,NA18489,NA18501,NA18505,NA18507,NA18508,NA18511,NA18519,NA18523,NA18532,NA18537,NA18542,NA18550,NA18552,NA18555,NA18558,NA18563,NA18564,NA18571,NA18573,NA18576,NA18577,NA18579,NA18582,NA18592,NA18593,NA18603,NA18605,NA18608…
1	104871756	.	9	.	ALU	+	INS	P1_MEI_1397	261	RP	lowcov	NA	.	YRI+CHB+JPT	.|0.16|0.02	0|38|45	0|12|2	.	.	.	11	31	12	MEI_RP	40	.			NA07037,NA11831,NA11920,NA12045,NA12489,NA18501,NA18508,NA18510,NA18522,NA18564,NA18573,NA18853,NA18909,NA19099,NA19102,NA19108,NA19147
1	104940163	.	10	.	ALU	-	INS	P1_MEI_1398	298	RP	lowcov	NA	.	CEU+YRI+CHB+JPT	0.10|0.07|0.58	41|35|43	8|5|50	.	.	Xing|GR2009|1104685271665	9	35	73	MEI_RP	40	.			NA06986,NA07357,NA11920,NA12144,NA12414,NA12763,NA18523,NA18526,NA18532,NA18537,NA18542,NA18545,NA18550,NA18552,NA18555,NA18558,NA18563,NA18564,NA18566,NA18572,NA18576,NA18579,NA18582,NA18592,NA18593,NA18603,NA18605,NA18608,NA18609,NA18638,NA18940,NA18943,NA18945,NA18948,NA18949,NA18951,NA18953,NA18956,NA18959,NA18973,NA19093,NA19108,NA19137
1	105032630	.	1	.	ALU	-	INS	P1_MEI_41&P2_MEI_326	135	RP|SR	lowcov+trio	val	PCR	CEU+YRI+CHB+JPT	0.46|0.10|0.20	52|43|49	48|9|20	.	.	Xing|GR2009|1104685271641	3	75	110	MEI_SR,MEI_RP	80	.			NA06986,NA07000,NA07037,NA07346,NA07357,NA10847,NA10851,NA11831,NA11881,NA11894,NA11918,NA11919,NA11920,NA11931,NA11993,NA11994,NA11995,NA12003,NA12004,NA12043,NA12044,NA12045,NA12154,NA12155,NA12287,NA12489,NA12716,NA12717,NA12749,NA12751,NA12761,NA12763,NA12776,NA12814,NA12815,NA12828,NA12873,NA12874,NA12878,NA12891,NA12892,NA18504,NA18510,NA18520,NA18522,NA18542,NA18558,NA18561,NA18562,NA18566…
1	105229832	105230162	1	1	ALU	-	DEL	P1_M_061510_1_261&P2_M_061510_1_85	330	RP,SR	lowcov+trio	val	ASM	CEU+YRI	0.23|0.31|.	28|43|0	13|27|0	esv3706	.	.	11	.	.	pindel_D,bc_deletion,washu,wtsi,broad,YALEU_SR,UWASH_RP,WTSI_RP,WASHU_RP,BC_RP	.	.	AluYa5	TTTTTTTTTTTTTTTTTTTTTTTTTTTTTTTTTTGAGACGGAGTCTCGCTCTGTCGCCCAGGCTGGAGTGCAGTGGCGGGATCTCGGCTCACTGCAAGCTCCGCCTCCCGGGTTCACGCCATTCTCCTGCCTCAGCCTCCCAAGTAGCTGGGACCACAGGCGCCCGCCACTACGCCCGGCTAATTTTTTGTATTTTTTAGTAGAGACGGGGTTTCACCGTTTTTTTTAGCCGGGATGGTCTCGATCTCCTGACCTCGTGATCCGCCCGCCTCGGCCTCCCAAAGTGCTGGGATTACAGGCGTGAGCCACCGCGCCCGGCC	NA06986,NA06994,NA07000,NA07037,NA07051,NA07346,NA07347,NA07357,NA10847,NA10851,NA11829,NA11830,NA11831,NA11881,NA11894,NA11918,NA11919,NA11920,NA11931,NA11992,NA11993,NA11994,NA11995,NA12003,NA12004,NA12006,NA12043,NA12044,NA12045,NA12144,NA12154,NA12155,NA12156,NA12249,NA12287,NA12414,NA12489,NA12716,NA12717,NA12749,NA12750,NA12751,NA12761,NA12763,NA12776,NA12813,NA12828,NA12878,NA12891,NA12892…
1	105659304	.	26	.	L1	-	INS	P1_MEI_1399	6050	RP	lowcov	NA	.	CEU	0.01|.|0.00	40|0|42	1|0|0	.	.	.	6	4	15	MEI_RP	38	.			NA12044,NA18486,NA18502,NA18510,NA18519,NA18520,NA18907,NA19147,NA19210,NA19225
1	105668293	105668567	1	1	ALU	-	DEL	P1_M_061510_1_264&P2_M_061510_1_88	274	SR,RP	lowcov+trio	val	ASM	CEU+YRI+CHB+JPT	0.54|0.57|0.54	40|47|42	43|54|45	esv4472	.	.	13	.	.	washu,wtsi,bc_deletion,pindel_D,BC_RP,YALEU_SR,WASHU_RP,PINDEL_SR,UWASH_RP	.	.	AluYb9	TTTTTTTTTGAGACGGAGTCTCGCTCTGTCGCCCAGGCCGGACTGAGGACTGCAGTGGCGCAATCTCGGCTCACTGCAAGCTCCGCTTCCCGGGTTCACGCCATTCTCCTGCCTCAGCCTCCCCAGTAGCTGGGACTACAGGCACCCACCACCGCGCCCGGCTAATTTTTTGTATTTTTAGTAGAGACGGGGTTTCACCTTGTTAGCCAGGATGGTCTCGATCTCCTGACCTCATGATCCACCCGCCTCGGCCTCCCAAAGT	NA06986,NA07037,NA07347,NA07357,NA10847,NA11829,NA11831,NA11881,NA11931,NA11993,NA11994,NA12043,NA12044,NA12045,NA12144,NA12154,NA12489,NA12716,NA12717,NA12750,NA12761,NA12878,NA12891,NA18498,NA18499,NA18516,NA18522,NA18537,NA18542,NA18547,NA18550,NA18555,NA18558,NA18563,NA18564,NA18566,NA18576,NA18577,NA18579,NA18592,NA18593,NA18603,NA18608,NA18609,NA18638,NA18853,NA18856,NA18858,NA18861,NA18870…
1	105775528	.	18	.	ALU	-	INS	P1_MEI_1400	181	RP	lowcov	NA	.	YRI	0.00|0.12|0.00	40|34|43	0|8|0	.	.	.	5	4	10	MEI_RP	28	.			NA18502,NA18510,NA18519,NA18522,NA19147,NA19225
1	106128107	.	64	.	ALU	-	INS	P1_MEI_1401	36	RP	lowcov	NA	.	YRI	0.00|0.06|0.00	37|34|41	0|4|0	.	.	.	.	2	5	MEI_RP	14	.			NA18501,NA18871,NA19114
1	106172663	.	5	.	ALU	+	INS	P1_MEI_3328	294	SR	lowcov	NA	.	CEU	0.03|.|.	15|0|0	1|0|0	.	.	.	12	2	1	MEI_SR	17	.			NA12045
1	106590922	.	89	.	ALU	-	INS	P1_MEI_1402	97	RP	lowcov	NA	.	YRI	0.00|0.03|0.00	40|36|41	0|2|0	.	.	.	.	2	4	MEI_RP	12	.			NA18870,NA19138
1	106820808	.	10	.	ALU	-	INS	P1_MEI_3329	.	SR	lowcov	NA	.	CEU	0.06|.|.	8|0|0	1|0|0	.	.	.	.	1	0	MEI_SR	4	.			NA12043
1	107943990	.	1	.	ALU	-	INS	P1_MEI_42&P2_MEI_1293	279	RP|SR	lowcov+trio	NA	.	CEU+YRI	0.33|0.28|.	52|43|0	34|24|0	.	.	.	11	67	115	MEI_SR,MEI_RP	80	GENE|VAV3|ENSG00000134215	AluYb8	TTCTTTTTTTTTTTTTTTTTTTGAGACGGAGTCTCGCTCTGTCGCCCAGGTCGGACTGCGGACTGCAGTGGCGCAATCTCGGCTCACTGCAAGCTCCGCTTCCCGGGTTCACGCCATTCTCCTGCCTCAGCCTCCCGAGTAGCTGGGACTACAGGCGCCCGCCACCGCGCCCGGCTAATTTTTTGTATTTTTAGTAGAGACGGGGTTTTCACCTTGTTAGCCAGGATGGTCTCGATCTCCTGACCTCATGATCCACCCGCCTCGGCCTCCCAAAGTGCTGGGATTACAGGCGTGAGCC	NA06986,NA07000,NA07051,NA07347,NA07357,NA10847,NA10851,NA11830,NA11831,NA11840,NA11881,NA11894,NA11918,NA11931,NA11992,NA11994,NA12004,NA12043,NA12044,NA12045,NA12144,NA12154,NA12156,NA12234,NA12249,NA12716,NA12717,NA12749,NA12750,NA12812,NA12873,NA12892,NA18489,NA18501,NA18504,NA18505,NA18519,NA18522,NA18523,NA18537,NA18542,NA18550,NA18555,NA18558,NA18561,NA18562,NA18563,NA18570,NA18576,NA18582…
1	110350031	.	91	.	ALU	-	INS	P1_MEI_1403	190	RP	lowcov	NA	.	CEU	0.02|0.00|0.00	41|39|41	2|0|0	.	.	.	.	2	4	MEI_RP	12	GENE|AHCYL1|ENSG00000168710			NA07037,NA12249
1	111503055	111503407	59	48	ALU	-	DEL	P1_M_061510_1_278	352	RP	lowcov	NA	.	.	.|.|.	0|0|0	0|0|0	.	.	.	.	.	.	bc_deletion	.	GENE|CEPT1|ENSG00000134255	AluYa5	TTTTTTTTTTTTTTTTTTTTTTGAGACGGAGTCTCGCTCTGTCGCCCAGGCTGGAGTGCAGTGGCGCAATCTCGGCTCACTGCAAGCTCCGCCTCCCGGGTTCACGCCATTCTCCTGCCTCAGCCTCCCAAGTAGCTAGGACTACAGGCGCCCGCCACTACGCCCGGCTAATTTTTTGTATTTTTAGTAGAGACGGGGTTTCACCGTTTTTTAGCCGGGATGGTCTCGATCTCCTGACCTCGTGATCCGCCCGCCTCGGCCTCCCAAAGTGCTGGGATTACAGGCGTGAGCCACCGCGCCCGGCATTCTTTTACAATTCTAATTGTTTCAGTGAGTTCTTCATTATGTAGCAC	NA18870,NA19093
1	111697696	.	4	.	SVA	+	INS	P1_MEI_1404&P2_MEI_1294	1596	RP	lowcov+trio	val	PCR	CEU+YRI+CHB+JPT	0.28|0.29|0.31	46|39|44	26|23|27	.	.	.	14	18	94	MEI_RP	80	GENE|RP5-1125M8.1|ENSG00000234020			NA06986,NA07000,NA07051,NA07346,NA07357,NA10851,NA11830,NA11918,NA11919,NA11993,NA12003,NA12004,NA12006,NA12044,NA12154,NA12249,NA12750,NA12751,NA12761,NA12763,NA12878,NA12891,NA18498,NA18501,NA18504,NA18511,NA18517,NA18519,NA18522,NA18526,NA18537,NA18545,NA18550,NA18561,NA18562,NA18563,NA18566,NA18572,NA18576,NA18577,NA18579,NA18582,NA18593,NA18605,NA18638,NA18853,NA18861,NA18870,NA18907,NA18940…
1	111802777	.	10	.	ALU	+	INS	P1_MEI_3330	.	SR	lowcov	NA	.	.	0.00|.|.	15|0|0	0|0|0	.	.	.	.	0	2	MEI_SR	5	GENE|ATP5F1|ENSG00000116459			NA19141
1	111809337	.	17	.	L1	+	INS	P1_MEI_1405	632	RP	lowcov	NA	.	.	.|.|.	0|0|0	0|0|0	.	.	.	.	.	.	MEI_RP	3	.			NA18505,NA18511,NA18870,NA18916
1	111833800	.	9	.	ALU	+	INS	P1_MEI_1406	299	RP	lowcov	val	PCR	CEU+YRI	0.01|0.23|.	39|37|0	1|17|0	.	.	.	11	58	17	MEI_RP	40	EXON|ADORA3|ENSG00000121933			NA07051,NA18505,NA18511,NA18516,NA18519,NA18532,NA18537,NA18555,NA18558,NA18561,NA18562,NA18563,NA18592,NA18603,NA18608,NA18609,NA18638,NA18861,NA18870,NA18871,NA18912,NA18940,NA18943,NA18945,NA18947,NA18948,NA18965,NA19099,NA19102,NA19114,NA19129,NA19225
1	111925198	.	10	.	ALU	-	INS	P1_MEI_3331	.	SR	lowcov	NA	.	CEU	0.19|.|.	13|0|0	5|0|0	.	.	Iskow|CELL2010|FSTNXB304JYBFU	.	6	0	MEI_SR	12	GENE|RAP1A|ENSG00000116473			NA12812,NA11881,NA11931
1	111983547	.	15	.	SVA	-	INS	P1_MEI_1407	1577	RP	lowcov	NA	.	CEU+CHB+JPT	0.05|.|0.03	37|0|44	4|0|3	.	.	.	19	10	7	MEI_RP	34	GENE|RAP1A|ENSG00000116473			NA11830,NA12003,NA12716,NA18523,NA18552,NA18858,NA18909,NA18952,NA18973,NA19116,NA19138
1	112537517	.	5	.	ALU	+	INS	P1_MEI_43&P2_MEI_1295	290	RP|SR	lowcov+trio	NA	.	CEU+YRI	0.16|0.17|.	46|41|0	15|14|0	.	.	.	12	43	24	MEI_SR,MEI_RP	78	GENE|AL445426.3|ENSG00000231246			NA07000,NA11881,NA11920,NA12003,NA12043,NA12045,NA12154,NA12716,NA12717,NA12763,NA12776,NA12874,NA12891,NA12892,NA18499,NA18501,NA18508,NA18510,NA18511,NA18564,NA18577,NA18592,NA18603,NA18853,NA18858,NA18944,NA18947,NA18949,NA18951,NA18960,NA18973,NA19005,NA19099,NA19108,NA19129,NA19238
1	112793517	.	1	.	ALU	-	INS	P1_MEI_44&P2_MEI_327	293	RP|SR	lowcov+trio	val	PCR	CEU+YRI+CHB+JPT	0.47|0.27|0.40	52|43|49	49|23|39	.	dbRIP_Alu_00485	.	14	112	153	MEI_SR,MEI_RP	80	GENE|CTTNBP2NL|ENSG00000143079	AluYa5	TTTTTTTTTTTTTTTTTTTTTTTTTGAGACGGAGTCTCGCTCTGTCGCCCAGGCTGGAGTGCAGTGGCAGGATCTCGGCTCACTGCAAGCTCCGCCTCCCGGGTTCACGCCATTCTCCTGCCTCAGCCTCCCAAGTAGCTGGGACTACAGGCGCCCGCCACTACGCCCGGCTAATTTTTTGTATTTTTAGTAGAGACGGGGTTTCACCATTTTAGCCGGGATGGTCTCGATCTCCTGACCTCGTGATCCGCCCGCCTCGGCCTCCCAAAGTGCTGGGATTACAGGCGTGAGGCCACCGCGCCCGGCC	NA06986,NA07037,NA07051,NA07346,NA07347,NA07357,NA10847,NA10851,NA11831,NA11881,NA11894,NA11918,NA11920,NA11931,NA11992,NA11993,NA11994,NA12004,NA12006,NA12043,NA12045,NA12144,NA12154,NA12156,NA12234,NA12249,NA12489,NA12717,NA12749,NA12750,NA12751,NA12761,NA12763,NA12776,NA12872,NA12873,NA12874,NA12878,NA12891,NA12892,NA18499,NA18501,NA18519,NA18526,NA18542,NA18550,NA18552,NA18555,NA18558,NA18561…
1	112980743	.	7	.	L1	-	INS	P2_MEI_1296	1611	RP	trio	NA	.	.	.|.|.	0|0|0	0|0|0	.	.	.	13	33	62	MEI_RP	40	GENE|CAPZA1|ENSG00000116489			NA19239,NA19240
1	113412845	113415300	1	1	SVA	+	DEL	P1_M_061510_1_1068&P2_M_061510_1_6	2455	SR,RP	lowcov+trio	val	ASM	CEU+YRI+CHB+JPT	0.78|0.36|0.40	25|38|41	39|27|33	.	.	.	17	.	.	washu,wtsi,AB_RP,YALEU_SR,BC_RP,WTSI_RP,UWASH_RP	.	GENE|AL390242.1|ENSG00000238198	SVA_F	GCTAGAAAAAGTAAATTATGGGAGTCGGCGCCGGCGAGCGCCGCCCGGGAGGCAGCGGCTGGAGGAGCGGACGGGCCCCGCGGGGCCCGAGGGCAAGGAGCAGCCGCCTGCCTTGGCCTCCCAAAGTGCCGAGATTGCAGCCTCTGCCCGGCTGCCACCCCGTCTGGGAAGTGAGGAGTGTCTCTGCCTGGCCGCCCATCGTCTGGGATGTGAGGAGCCCCTCTGCCTGGCTGCCCAGTCTGGAAAGTGAGGAGCGTCTCCGCCCGGCCGCCATCCCATCTAGGAAGTGAGGAGCGCCTCTTCCCAGCCGCCATCACATCTAGGAAGTGAGGAGCGTCTCTGCCCGGCCGCCCATCGTCTGAGATGTGGGGAGCGCCTCTGCCCCGCCGCCCCATCTGG…	NA11894,NA11919,NA11920,NA11994,NA12717,NA12763,NA12828,NA18498,NA18501,NA18502,NA18507,NA18508,NA18510,NA18516,NA18517,NA18523,NA18526,NA18545,NA18558,NA18561,NA18562,NA18566,NA18572,NA18576,NA18608,NA18609,NA18853,NA18858,NA18861,NA18907,NA18916,NA18943,NA18949,NA18951,NA18953,NA18964,NA18973,NA19093,NA19099,NA19108,NA19137,NA19138,NA19172,NA19239,NA19239,NA19240
1	113841350	113847400	1	1	L1	+	DEL	P1_M_061510_1_282&P2_M_061510_1_674	6050	RP	lowcov+trio	val	ASM	CEU+YRI+CHB+JPT	0.91|0.96|0.66	35|47|31	64|90|41	nsv435905	.	.	15	.	.	bc_deletion,YALEU_RP,WTSI_RP	.	GENE|MAGI3|ENSG00000081026	L1HS	GGAATAGGAACAGCTCCGGTCTACAGCTCCCAGCGTGAGCGACGCAGAAGACGGGTGATTTCTGCATTTCCATCTGAGGTACCGGGTTCATCTCACTAGGGAGTGCCAGACAGTGGGCGCAGGCCAGTGTGTGTGCGCACCGTGCGCGAGCCGAAGCAGGGCGAGGCATTGCCTCACCTGGGAAGCGCAAGGGGTCAGGGAGTTCCCTTTCCGAGTCAAAGAAAGGGGTGATGGACGCACCTGGAAAATCGGGTCACTCCCACCCGAATATTGCGCTTTTCAGACCGGCTTAAGAAACGGCGCACCACGAGACTATATCCCACACCTGGCTCAGAGGGTCCTACGCCCACGGAATCTCGCTGATTGCTAGCACAGCAGTCTGAGATCAAACTGCAAGGC…	NA18571,NA18572,NA18576,NA18592,NA18638,NA19102,NA12878,NA12891,NA12892
1	114845043	114845355	1	1	ALU	+	DEL	P1_M_061510_1_283&P2_M_061510_1_102	312	SR,RP	lowcov+trio	val	PCR,ASM	CEU+YRI+CHB+JPT	0.72|0.50|0.97	44|49|56	63|49|109	.	.	.	11	.	.	washu,wtsi,broad,pindel_D,bc_deletion,PINDEL_SR,WASHU_RP,YALEU_SR,BC_RP,UWASH_RP	.	GENE|TRIM33|ENSG00000197323	AluYa5	GGCCGGGCGCGGTGGCTCACGCCTGTAATCCCAGCACTTTGGGAGGCCGAGGCGGGCGGATCACGAGGTCAGGAGATCGAGACCATCCCGGCTAACACGGTAAAACCCCGTCTCTACTAAAAATACAAAAAATTAGCCGGGCGTAGTGGCGGGCGCCTGTAGTCCCAGCTACTTGGGAGGCTGAGGCAGGAGAATGGCGTGAACCCGGGAGGCGGAGCTTGCAGTGAGCCGAGATCCCGCCACTGCACTCCAGCCTGGGCGACAGAGCGAGACTCCGTCTCAAAAAAAAAAAAAAAAAAAAA	NA06994,NA07037,NA07346,NA07347,NA07357,NA11894,NA11918,NA11992,NA11995,NA12003,NA12045,NA12155,NA12249,NA12489,NA12750,NA12761,NA12763,NA12776,NA12813,NA18486,NA18498,NA18499,NA18502,NA18504,NA18505,NA18507,NA18508,NA18516,NA18517,NA18519,NA18520,NA18523,NA18550,NA18562,NA18605,NA18907,NA18909,NA18916,NA18942,NA18949,NA18959,NA18967,NA18968,NA18971,NA18972,NA18974,NA18975,NA18976,NA18980,NA18981…
1	115598411	115598695	1	1	ALU	+	DEL	P1_M_061510_1_287&P2_M_061510_1_104	284	AS,RP,SR	lowcov+trio	val	ASM	CEU+YRI+CHB+JPT	0.48|0.84|0.32	27|40|37	26|67|24	esv5685	.	.	14	.	.	wtsi,washu,pindel_D,broad,bc_deletion,YALEU_SR,WASHU_RP,PINDEL_SR,OXFDU_AS,BC_RP	.	.	AluYa5	GGCCGAGGCGGGCGGATCACGAGGTCAGGAGATCGAGACCATCCCGGCTAAAACGGTGAAACCCCGTCTCTACTAAAAATACAAAAAAATTAGCCGGGCGTAGTGGCGGGCGCCTGTAGTCCCAGCTACTTGGGAGGCTGAGGCAGGAGAATGGCGTGAACCCGGGAGGCGGAGCTTGCAGTGAGCCGAGATCCCGCCACTGCACTCCAGCCTGGGCGACAGAGCGAGACTCCGTCTCAAAAAAAAAAAAAAAAAAAAAAAAAAAAAAAAA	NA06986,NA06994,NA07000,NA07037,NA07051,NA07346,NA07357,NA10847,NA10851,NA11830,NA11831,NA11881,NA11894,NA11918,NA11931,NA11992,NA11994,NA11995,NA12003,NA12004,NA12005,NA12006,NA12043,NA12044,NA12045,NA12144,NA12154,NA12155,NA12156,NA12249,NA12287,NA12414,NA12716,NA12717,NA12751,NA12761,NA12776,NA12813,NA12828,NA12878,NA12891,NA12892,NA18486,NA18498,NA18499,NA18501,NA18502,NA18504,NA18507,NA18510…
1	116785083	.	7	.	ALU	-	INS	P1_MEI_45&P2_MEI_1297	289	RP|SR	lowcov+trio	NA	.	CEU+YRI+CHB+JPT	0.03|0.22|0.03	53|43|50	3|19|3	.	.	.	9	25	41	MEI_SR,MEI_RP	80	GENE|AL136376.2|ENSG00000233154			NA11919,NA11992,NA12814,NA12874,NA18489,NA18498,NA18502,NA18508,NA18510,NA18517,NA18519,NA18523,NA18562,NA18856,NA18861,NA18909,NA18942,NA18964,NA19102,NA19114,NA19129,NA19147,NA19190,NA19225,NA19239,NA19257
1	116879704	116880010	69	41	ALU	+	DEL	P1_M_061510_1_289&P2_M_061510_1_107	306	RP	lowcov+trio	NA	.	CEU+YRI+CHB+JPT	0.88|0.62|0.39	44|51|53	77|63|41	esv3433	.	.	.	.	.	broad,bc_deletion,washu,pindel_D,wtsi,BC_RP	.	GENE|AL136376.3|ENSG00000230381	AluY	TGGCCGGGCGCGGTGGCTCACGCCTGTAATCCCAGCACTTTGGGAGGCCGAGGCGGGCGGATCACGAGGTCAGGAGATCGAGACCATCCTGGCTAACACGGTGAAACCCCGTCTCTACTAAAAATACAAAAAATTAGCCGGGCGTGGTGGCGGGCGCCTGTAGTCCCAGCTACTCGGGAGGCTGAGGCAGGAGAATGGCGTGAACCCAGGAGGCGGAGCTTGCAGTGAGCCGAGATCGCGCCACTGCACTCCAGCCTGGGCGACAGAGCGAGACTCTGTCTCAAAAAAAAAAAAAAAAAAAAAAAAA	NA06994,NA07037,NA10851,NA11894,NA11992,NA11994,NA12003,NA12004,NA12005,NA12006,NA12044,NA12045,NA12144,NA12154,NA12751,NA12761,NA12813,NA18486,NA18489,NA18498,NA18499,NA18501,NA18504,NA18507,NA18508,NA18510,NA18511,NA18516,NA18519,NA18523,NA18526,NA18532,NA18537,NA18542,NA18545,NA18547,NA18550,NA18552,NA18555,NA18558,NA18561,NA18562,NA18563,NA18570,NA18571,NA18572,NA18573,NA18576,NA18577,NA18579…
1	116892795	.	46	.	ALU	+	INS	P1_MEI_1408	51	RP	lowcov	NA	.	CEU	0.03|0.00|0.00	37|36|38	2|0|0	.	.	.	.	6	6	MEI_RP	23	GENE|AL136376.3|ENSG00000230381			NA07051,NA12249
1	117123933	.	10	.	ALU	+	INS	P2_MEI_2212	95	SR	trio	NA	.	.	.|.|.	0|0|0	0|0|0	.	.	.	.	2	0	MEI_SR	5	.			NA19240
1	117892559	117892781	1	1	ALU	+	DEL	P1_M_061510_1_290&P2_M_061510_1_108	222	AS,SR,RP	lowcov+trio	val	ASM	CEU+YRI+CHB+JPT	0.20|0.19|0.12	41|47|57	16|18|14	esv5132	.	.	15	.	.	bc_deletion,pindel_D,broad,BC_RP,YALEU_SR,WASHU_RP,OXFDU_AS,PINDEL_SR,UWASH_RP	.	.	AluYa5	CCTAAAACGGTGAAACCCCGTCTCTACTAAAAATACAAAAAATTAGCCGGGCGTAGTGGCGGGCGCCTGTAGTCCCAGCTACTTGGGAGGCTGAGGCAGGAGAATGGCGTGAACCCGGGAGGCGGAGCTTGCAGTGAGCCGAGATCCCGCCACTGCACTCCAGCCTGGGCGACAGAGCGAGACTCCGTCTCAAAAAAAAAAAAAAAAA	NA06986,NA06994,NA07000,NA07037,NA07051,NA07346,NA07347,NA07357,NA10847,NA10851,NA11829,NA11830,NA11831,NA11881,NA11894,NA11918,NA11920,NA11931,NA11992,NA11993,NA11994,NA11995,NA12003,NA12004,NA12006,NA12043,NA12044,NA12045,NA12144,NA12154,NA12155,NA12249,NA12287,NA12414,NA12489,NA12716,NA12717,NA12749,NA12750,NA12751,NA12761,NA12763,NA12813,NA12828,NA12878,NA12891,NA12892,NA18486,NA18489,NA18498…
1	118181194	.	10	.	ALU	+	INS	P1_MEI_46	236	SR|RP	lowcov	NA	.	CEU+CHB+JPT	0.02|0.00|0.03	50|42|50	2|0|3	.	.	.	.	9	9	MEI_SR,MEI_RP	40	.			NA07037,NA12249,NA18545,NA18547,NA18552
1	118882214	.	1	.	ALU	-	INS	P1_MEI_47&P2_MEI_328	293	RP|SR	lowcov+trio	val	PCR	CEU+CHB+JPT	0.40|.|0.17	51|0|47	41|0|16	.	dbRIP_Alu_01027	.	14	69	100	MEI_SR,MEI_RP	80	.	AluYa5	TTTTTTTTTTTNTTTTTTTTTTTTTTTTTGTAGACGGAGTCTCGCTCTGTCGCCCAGGCTGGAGTGCAGTGGCGGGATCTCGGCTCACTGCAAGCTCCGCCTCCCGGGTTCACGCCATTCTCCTGCCTCAGCCTCCCAAGTAGCTGGGACTACAGGCGCCCGCCACTACGCCCGGCTAATTTTTTGTATTTTTTAGTAGAGACGGGGGTTTTCACCCGTTTTAGCCGGGATGGTCTCGATCTCCTGACCTCGTGATCCGCCCGCCTCGGCCTCCCAAAGTGCTGGGATTACAGGACGTGAGCCACCGCGCCCGGCC	NA06986,NA07000,NA07037,NA07051,NA07346,NA07347,NA07357,NA10847,NA10851,NA11831,NA11840,NA11881,NA11918,NA11919,NA11920,NA11931,NA12003,NA12004,NA12006,NA12043,NA12044,NA12045,NA12155,NA12234,NA12249,NA12489,NA12717,NA12750,NA12761,NA12763,NA12814,NA12815,NA12872,NA12873,NA12874,NA12878,NA12891,NA12892,NA18498,NA18504,NA18516,NA18526,NA18532,NA18555,NA18564,NA18571,NA18572,NA18576,NA18608,NA18940…
1	119354871	.	7	.	L1	+	INS	P1_MEI_48	1040	SR|RP	lowcov	val	PCR	CEU+CHB+JPT	0.12|0.00|0.45	51|39|44	12|0|40	.	.	.	10	87	30	MEI_SR,MEI_RP	40	.			NA07037,NA07357,NA11829,NA11894,NA11918,NA11919,NA11920,NA12044,NA12144,NA12249,NA12717,NA12814,NA12828,NA12873,NA18537,NA18542,NA18545,NA18547,NA18550,NA18555,NA18558,NA18561,NA18563,NA18564,NA18566,NA18570,NA18571,NA18576,NA18579,NA18582,NA18592,NA18593,NA18603,NA18605,NA18609,NA18943,NA18944,NA18947,NA18948,NA18949,NA18951,NA18956,NA18960,NA18961,NA18973
1	119360294	119360613	1	1	ALU	-	DEL	P1_M_061510_1_292	319	SR,RP	lowcov	val	PCR,ASM	CEU+YRI+CHB+JPT	0.77|1.00|0.50	43|53|53	66|106|53	esv6867	.	.	11	.	.	bc_deletion,washu,wtsi,pindel_D,broad	.	.	AluYg6	TTTTTTTTTTTTTTTTTTTTTTTTTTTTTTGAGACGGAGTTTCGCTCTGTCGCCCAGGCTGGAGTGCAGTGGCGCGATCTCGACTCACTGCAAGCTCCGCCTCCCGGGTTCACGCCATTCTCCTGCCTCAGCCTCCCGTGTAGCTGGGACTACAGGCGCGCGCCACCACGCCCGGCTAATTTTTGTATTTTTAGTAGAGACGGGGTTTCACCGTGTTAGCCAGGATGGTCTCGATCTCCTGACCTCGTGATCCGCCCGTCTCGGCCTCCCAAAGTGCTGGGATTACAGGCGTGAGCCACCGCGCCCGGC	NA06994,NA07037,NA07357,NA11829,NA11894,NA11919,NA11920,NA11993,NA12004,NA12044,NA12154,NA12249,NA12287,NA12414,NA12489,NA12717,NA12761,NA12776,NA12813,NA12828,NA18486,NA18537,NA18542,NA18545,NA18550,NA18555,NA18558,NA18561,NA18563,NA18564,NA18570,NA18571,NA18573,NA18576,NA18579,NA18582,NA18592,NA18593,NA18603,NA18605,NA18609,NA18638,NA18853,NA18943,NA18945,NA18947,NA18948,NA18949,NA18951,NA18953…
1	121186733	.	7	.	L1	-	INS	P1_MEI_3332&P2_MEI_2213	3247	SR	lowcov+trio	NA	.	.	.|.|.	0|0|0	0|0|0	.	.	.	.	1	0	MEI_SR	1	.			NA12815,NA12878,NA19143
1	141486371	.	23	.	L1	-	INS	P1_MEI_3333	.	SR	lowcov	NA	.	.	.|.|.	0|0|0	0|0|0	.	.	.	.	.	.	MEI_SR	3	.			NA12287
1	141966323	.	23	.	L1	-	INS	P2_MEI_2214	.	SR	trio	NA	.	.	.|.|.	0|0|0	0|0|0	.	.	.	.	.	.	MEI_SR	3	GENE|BX571672.6|ENSG00000232274			NA19240
1	143738086	143738409	1	1	ALU	+	DEL	P1_M_061510_1_293&P2_M_061510_1_112	323	RP,SR	lowcov+trio	val	ASM	.	.|.|.	0|0|0	0|0|0	esv6218	.	.	17	.	.	broad,bc_deletion,YALEU_SR,BC_RP,UWASH_RP,WTSI_RP,WASHU_RP	.	GENE|PDE4DIP|ENSG00000178104	AluYb8	TGGCCGGGCGCGGTGGCTCACGCCTGTAATCCCAGCACTTTGGGAGGCCGAGGCGGGTGGATCATGAGGTCAGGAGATCGAGACCATCCTGGCTAACAAGGTGAAACCCCGTCTCTACTAAAAATACAAAAAATTAGCCGGGCGCGGTGGCGGGCGCCTGTAGTCCCAGCTACTCGGGAGGCTGAGGCAGGAGAATGGCGTGAACCCGGGAAGCGGAGCTTGCAGTGAGCCGAGATTGCGCCACTGCAGTCCGCAGTCCGGCCTGGGCGACAGAGCGAGACTCCGTCTCAAAAAAAAAAAAAAAAAA	NA06986,NA06994,NA07000,NA07037,NA07051,NA07346,NA07347,NA07357,NA10847,NA10851,NA11829,NA11830,NA11831,NA11881,NA11894,NA11918,NA11919,NA11920,NA11931,NA11992,NA11993,NA11994,NA11995,NA12003,NA12004,NA12006,NA12043,NA12044,NA12045,NA12144,NA12155,NA12156,NA12249,NA12287,NA12414,NA12489,NA12716,NA12717,NA12749,NA12750,NA12751,NA12761,NA12763,NA12776,NA12813,NA12828,NA12878,NA12891,NA12892,NA18486…
1	143809599	.	4	.	ALU	-	INS	P1_MEI_1409&P2_MEI_329	304	RP|SR	lowcov+trio	NA	.	CEU+YRI+CHB+JPT	0.10|0.16|0.05	46|44|50	9|14|5	.	.	.	16	34	43	MEI_SR,MEI_RP	80	GENE|SEC22B|ENSG00000223380			NA11829,NA11881,NA11992,NA12003,NA12249,NA12716,NA12717,NA12761,NA12828,NA12878,NA12892,NA18489,NA18505,NA18507,NA18510,NA18522,NA18555,NA18570,NA18572,NA18638,NA18853,NA18858,NA18870,NA18912,NA18916,NA18949,NA19005,NA19102,NA19138,NA19190,NA19210,NA19239,NA19240
1	143922668	.	23	.	ALU	+	INS	P1_MEI_3334	.	SR	lowcov	NA	.	.	.|.|.	0|0|0	0|0|0	.	.	.	.	.	.	MEI_SR	3	GENE|NOTCH2NL|ENSG00000213240			NA19141
1	145124829	.	1	.	ALU	+	INS	P1_MEI_49&P2_MEI_330	290	RP|SR	lowcov+trio	val	PCR	CEU+YRI	0.04|0.10|0.00	54|45|49	4|9|0	.	dbRIP_Alu_00488	.	13	25	19	MEI_SR,MEI_RP	80	UTR|FMO5|ENSG00000131781	AluYa5	GGCCGGGCGCGGTGGCTCACGCCTGTAATCCCAGCACTTTGGGAGGCCGAGGCGGGCGGATCACGAGGTCAGGAGATCGAGACCATCCCGGCTAAAACAGTGAAACCCCGTCTCTACTAAAAATACAAAAAATTAGCCGGGCGTAGTGGCGGGCGCCTGTAGTCCCAGCTACTCGGGAAGGCTGAGGCAGGAGAATGGCGTGAACCCGGGAGGCGGAGCTTGCAGTGAGCCGAGATCCCGCCACTGCACTCCAGCCGTGGGCGACAGAGCGAGACTCCGTCTACCAAAAAAAAAAAAAAAAAAAAA	NA12003,NA12154,NA12749,NA12812,NA12828,NA12878,NA12891,NA18502,NA18861,NA18907,NA19108,NA19114,NA19129,NA19138,NA19239
1	145618401	.	10	.	ALU	-	INS	P1_MEI_3335	.	SR	lowcov	NA	.	CEU	0.05|.|.	11|0|0	1|0|0	.	.	.	.	1	0	MEI_SR	4	.			NA12814
1	145856783	145857091	1	1	ALU	-	DEL	P1_M_061510_1_295&P2_M_061510_1_114	308	SR,RP	lowcov+trio	val	ASM	.	.|.|.	0|0|0	0|0|0	esv9211	.	.	0	.	.	pindel_D,wtsi,bc_deletion,UWASH_RP,PINDEL_SR,WTSI_RP,BC_RP	.	.	AluY	TTAAATTTTTTTTTTTTTTTTTTTGAGACGGAGTCTCGCTCTGTCACCCAGGCTGGAGTGCAGTGGCTCAATCTCGGCTCACTCACTGCAAGCTCTGCCTCCCGGGTTCACGCCATTCTCCTGCCTCAGCCTCCCAAGTAGCTAGGACTACAGGCGCCCGCCACCATGCCCGGCTAATTTTTTGTATTTTTTAGTAGAGACGGGGTTTCCCGTGTTAGCCAGGATGGTCTTGATTTCCTGACCTCGTGATCCGCCCGCCTTGGCCTCCCAAAGTGCTGGGATTACAGGCGTGAGCCACCGCACCCGGCC	NA06986,NA07357,NA11894,NA11993,NA11995,NA12003,NA12004,NA12154,NA12155,NA12287,NA12751,NA12761,NA12776,NA12878,NA12892,NA18502,NA18508,NA18511,NA18523,NA18537,NA18542,NA18547,NA18550,NA18555,NA18558,NA18561,NA18563,NA18564,NA18571,NA18572,NA18576,NA18582,NA18593,NA18861,NA18909,NA18943,NA18944,NA18945,NA18947,NA18948,NA18951,NA18964,NA18965,NA18980,NA19093,NA19099,NA19108,NA19114,NA19116,NA19138…
1	148304466	148304522	1	1	ALU	-	DEL	P1_M_061510_1_977&P2_M_061510_1_485	56	AS,SR	lowcov+trio	val	ASM	CEU+YRI+CHB+JPT	0.15|0.46|0.05	33|50|39	10|46|4	.	.	.	10	.	.	pindel_D,PINDEL_SR,OXFDU_AS,YALEU_SR	.	.	AluYc	TTTTTTTTTTTTTTTTTTTTTTTTTGAGACGGAGTCTCGCTCTGTCG	NA06986,NA07000,NA07051,NA07346,NA07347,NA07357,NA10847,NA11831,NA11881,NA11919,NA11920,NA11931,NA11992,NA11993,NA12003,NA12004,NA12249,NA12414,NA12716,NA12717,NA12750,NA12751,NA12761,NA12776,NA12828,NA12891,NA12892,NA18498,NA18501,NA18502,NA18505,NA18507,NA18508,NA18526,NA18532,NA18537,NA18545,NA18550,NA18552,NA18558,NA18562,NA18564,NA18566,NA18571,NA18572,NA18576,NA18579,NA18593,NA18603,NA18605…
1	148466752	.	10	.	ALU	-	INS	P1_MEI_3336	.	SR	lowcov	NA	.	CEU	0.18|.|.	14|0|0	5|0|0	.	.	.	.	4	0	MEI_SR	8	GENE|ANP32E|ENSG00000143401			NA12287,NA07347,NA11894
1	148958059	148958393	1	1	ALU	+	DEL	P1_M_061510_1_296&P2_M_061510_1_12	334	SR,AS,RP	lowcov+trio	val	ASM	CEU+YRI	0.17|0.14|.	36|45|0	12|13|0	esv3600	.	.	16	.	.	washu,pindel_D,bc_deletion,UWASH_RP,BC_RP,WASHU_RP,OXFDU_AS,WTSI_RP,PINDEL_SR,YALEU_SR,AB_RP	.	GENE|HORMAD1|ENSG00000143452	AluYa5	TGCCGGGCGCGGTGGCTCACGCCTGTAATCCCAGCACTTTGGGAGGCCGAGGCGGGCGGATCACGAGGTCAGGAGATCGAGACCATCCCGGCTAAAACGGTGAAACCCCGTCTCTACTAAAAATACAAAAAATTAGCCGGGCGTAGTGGCGGGCGCCTGTAGTCCCAGCTACTTGGGAGGCTGAGGCAGGAGAATGGCGTGAACCCGGGAGGCGGAGCTTGCAGTGAGCCGAGATCCCGCCACTGCACTCCAGCCTGGGCGACAGAGCGAGACTCTGTCTCAAAAAAAAAAAAAAAAAAAAAAAAAAAAAAAAAAAAAA	NA06986,NA07000,NA07037,NA07051,NA07346,NA07347,NA07357,NA10847,NA10851,NA11829,NA11830,NA11831,NA11881,NA11894,NA11918,NA11919,NA11920,NA11992,NA11993,NA11994,NA11995,NA12003,NA12004,NA12006,NA12043,NA12044,NA12045,NA12154,NA12155,NA12156,NA12249,NA12287,NA12414,NA12489,NA12716,NA12717,NA12749,NA12750,NA12751,NA12761,NA12763,NA12776,NA12828,NA18489,NA18498,NA18499,NA18501,NA18502,NA18504,NA18505…
1	148963269	.	66	.	ALU	-	INS	P1_MEI_1410	60	RP	lowcov	NA	.	CHB+JPT	.|.|0.09	0|0|11	0|0|2	.	.	.	.	3	7	MEI_RP	20	.			NA07346,NA07347,NA12287,NA12749,NA18505,NA18511,NA18519,NA18964,NA19093
1	150710530	.	10	.	L1	-	INS	P1_MEI_3337	.	SR	lowcov	NA	.	CEU	0.04|.|.	12|0|0	1|0|0	.	.	.	.	0	1	MEI_SR	4	.			NA11881
1	151089673	.	4	.	ALU	-	INS	P1_MEI_3338&P2_MEI_331	290	RP|SR	lowcov+trio	NA	.	.	0.00|.|.	17|0|0	0|0|0	.	.	.	11	3	1	MEI_SR,MEI_RP	54	.	AluYa5	TTTTTTTTTTTTTTTTTTTTGTTTGTTTTGAGACGGAGTCTCGCTCTGTCGCCCAGGCTGGAGTGCAGTGGCGGGATCTCGGCTACACTGCAAGCTCCGCCTCCCGGGTTCACGCCATTCTCCTGCCTTCTTAGTCCTTCCCAAGTAGCTGGGACTACAGGCGCCCGCCACTACGCCTGGCTAATTTTTTGTATTTTTAGTTAGAGACGGGGTTTCACCGTTTAGTCCGGGATGGTCTCGATCTCCTGACCTCGTGATCCGCCCGCCTCGGCCTCCCAAAGTGCTGGGATTACAGGCGTGAGCCACCGCGCCCGGCC	NA19143,NA19239,NA19240
1	152390382	.	6	.	ALU	-	INS	P1_MEI_3339&P2_MEI_1298	78	RP|SR	lowcov+trio	NA	.	.	0.00|.|.	18|0|0	0|0|0	.	.	.	12	2	0	MEI_SR,MEI_RP	45	GENE|NUP210L|ENSG00000143552	AluY	TTTTTTTTTTTTTTTTGAGACGGAGTCTCGCTCTGTCGCCCAGGCTGGAGTGCAGTGGCGCGATCTCGGCTCACTGCAAGCTCCGCCTCCCGGGTTCACGCCATTCTCCTGCCTCAGCCTCCCAAGTAGCTGGGACTACAGGCGCCCGCCACTACGCCCGGCTAATTTTTTGATTTTTAGTAGAGACGGGGTTTCACCGTTGTTAGCCAGGATGGTCTCGATCTCCTGACCTGTGATCCGCCCGCCTCGGCCTACCAAAGTGCTGGGATTACAGGCGTGAGCCACCGCGCCCGGCC	NA19143,NA19238,NA19240
1	154793328	154795559	1	1	SVA	+	DEL	P1_M_061510_1_299&P2_M_061510_1_14	2231	SR,RP,AS	lowcov+trio	val	PCR,ASM	CEU+YRI+CHB+JPT	0.01|0.11|0.04	42|48|52	1|11|4	esv2824	.	.	19	.	.	washu,pindel_D,yale_solid,bc_deletion,OXFDU_AS,UWASH_RP,BC_RP,WTSI_RP,AB_RP,YALEU_SR,WASHU_RP,BGI_AS	.	GENE|IQGAP3|ENSG00000183856	SVA_E+SVA_F	CCTCTGCCCCGCCGCCCTGTCTGGGATGTGAGGAGCACCTCTGCTGGGCCGCAACCCTGTCTGGGATGTGAGGAGTGCCTCTGCCCGGCCGCCCCGTCTGAGAAGTGAGGAAACCCTCTGCCTGGCAACCGCCCCGTCTGAGAAGTGAGGAGCCCCTCCGTCCGGCAGCCACCCCGTCTGGGAAGTGAGGAGCGTCTCCGCCCGGCAGCCACCCCGTCCGGGAGGGAGGTGGCGGGGGGGTCAGCCCCACGCCCGGCCAGCCGCCCCGTCCGGGAGGTGAGGGGCTCCTCTGCCCGGCCGCCCCTACTGGGAAGTGAGGAGCCCCTCTGCCCGGCCAGCCGCCCCGTCCGGGAGGGAGGTGGGGGGTCAGCCCCCCGCCCGGCCAGCCGCCCAGTCCGG…	NA06985,NA06986,NA06994,NA07000,NA07037,NA07051,NA07346,NA07347,NA07357,NA10847,NA10851,NA11829,NA11830,NA11831,NA11832,NA11840,NA11881,NA11894,NA11918,NA11919,NA11920,NA11931,NA11992,NA11993,NA11994,NA11995,NA12003,NA12004,NA12005,NA12006,NA12043,NA12044,NA12045,NA12144,NA12154,NA12155,NA12156,NA12249,NA12287,NA12414,NA12489,NA12716,NA12717,NA12749,NA12750,NA12751,NA12760,NA12761,NA12763,NA12776…
1	154822878	.	14	.	SVA	-	INS	P2_MEI_1299	922	RP	trio	NA	.	.	.|.|.	0|0|0	0|0|0	.	.	.	3	45	20	MEI_RP	40	GENE|TTC24|ENSG00000187862			NA19239,NA19240
1	155502366	.	22	.	ALU	-	INS	P1_MEI_1411	104	RP	lowcov	NA	.	CEU+YRI+CHB+JPT	0.01|0.11|0.04	40|33|49	1|7|4	.	.	.	.	14	11	MEI_RP	40	.			NA12043,NA18489,NA18498,NA18542,NA18552,NA18566,NA18609,NA18861,NA19093,NA19147
1	155630112	.	1	.	ALU	-	INS	P1_MEI_50	303	SR|RP	lowcov	val	PCR	YRI	.|0.50|.	0|14|0	0|14|0	.	.	.	15	28	33	MEI_SR,MEI_RP	40	.			NA07000,NA07037,NA07051,NA11931,NA12044,NA12287,NA12716,NA12751,NA12761,NA12776,NA18498,NA18502,NA18505,NA18508,NA18532,NA18537,NA18545,NA18547,NA18550,NA18552,NA18555,NA18558,NA18564,NA18566,NA18570,NA18571,NA18572,NA18573,NA18592,NA18603,NA18608,NA18609,NA18853,NA18870,NA18871,NA18944,NA18945,NA18948,NA18959,NA18964,NA18970,NA18980,NA19102
1	156722923	.	5	.	ALU	-	INS	P1_MEI_51	286	SR|RP	lowcov	NA	.	CEU	0.10|0.00|0.00	50|39|48	10|0|0	.	.	.	7	5	17	MEI_SR,MEI_RP	40	GENE|AL365440.2|ENSG00000236656	AluYa5	TTTTCTTTTTTTTTTNTTTTTTTTTTTTTGTAGACGGAGTCTCGCTCTGTCGCCCAGGCTGGAGTGCAGTGGCGGGATCTCGGCTCACTGCAAGCTCCGCCTCCCGGGTTCACGCCATTCTCCTGCCTCAGCCTCCCAAGTAGCTGGGACTACAGGCGCCCGCCACTACGCCCGGCTAATTTTTTGTATTTTTAGTAGAGACGGGGTTTCACCGTTTTAGCCGGGATGGTCTCGATCTCCTGACCTCGTGATCCGCCCGCCTCGGCCTCCCAAAGTGCTGGGATTACAGGCGTGAGCCACCGCGCCCCGGCC	NA07037,NA07357,NA11931,NA11992,NA12003,NA12004,NA12155,NA12717,NA12812,NA12815
1	156895995	156896323	1	1	ALU	-	DEL	P1_M_061510_1_303&P2_M_061510_1_125	328	RP,SR	lowcov+trio	val	ASM	CEU+YRI+CHB+JPT	0.73|0.19|0.70	41|40|55	60|15|77	esv9069	.	.	16	.	.	broad,washu,bc_deletion,pindel_D,wtsi,PINDEL_SR,YALEU_SR,BC_RP,WASHU_RP,UWASH_RP	.	GENE|SPTA1|ENSG00000163554	AluYb8	TTTTTTTTTTTTTTTTTTTTTTTTTGAGACGGAGTCTCGCTCTGTCGCCCAGGCCGGACTGCGGACTGCAGTGGCGCAATCTCGGCTCACTGCAAGCTCCGCTTCCCGGGTTCACGCCATTCTCCTGCCTCAGCCTCCCGAGTAGCTGGGACTACAGGCGCCCGCCACCGCGCCCGGCTAATTTTTTGTATTTTTAGTAGAGACGGGGTTTCACCTTGTTAGCCAGGATGGTCTCGATCTCCTGACCTCATGATCCACTCGCCTCGGCCTCCCAAAGTGCTGGGATTACAGGCGTGAGCCACCGCGCCCGGCC	NA06994,NA07037,NA07357,NA11920,NA11931,NA11992,NA11995,NA12003,NA12004,NA12044,NA12144,NA12154,NA12155,NA12287,NA12414,NA12489,NA12716,NA12750,NA12761,NA12813,NA12828,NA18486,NA18489,NA18498,NA18499,NA18502,NA18504,NA18505,NA18507,NA18508,NA18510,NA18511,NA18516,NA18517,NA18519,NA18520,NA18522,NA18523,NA18526,NA18532,NA18545,NA18550,NA18552,NA18555,NA18561,NA18566,NA18571,NA18572,NA18576,NA18577…
1	156978655	156978977	1	1	ALU	+	DEL	P1_M_061510_1_304&P2_M_061510_1_126	322	RP,SR	lowcov+trio	val	ASM	YRI+CHB+JPT	.|0.62|0.53	0|46|56	0|57|59	esv3737	.	.	16	.	.	washu,wtsi,broad,pindel_D,bc_deletion,YALEU_SR,BC_RP,WASHU_RP,PINDEL_SR,UWASH_RP,WTSI_RP	.	GENE|OR6K5P|ENSG00000226949	AluYa5	GGCCGGGCGCGGTGGCTCACGCCTGTAATCCCAGCACTTTGGGAGGCCGAGGCGGGCGGATCACGAGGTCAGGAGATCGAGACCATCCCGGCTAAAACGGTGAAACCCCGTCTCTACTAAAAATACAAAAAATTAGCCGGGCGTAGTGGCGCGCGCCTGTAGTCCCAGCTACTTGGGAGGCTGAGGCAGGAGAATGGCGTGAACCCGGGAGGCGGAGCTTGCAGTGAGCCGAGATCCCGCCACTGCACTCCAGCCTGGGCGACAGAGCGAGACTCCGTCTCAAAAAAAAAAAAAAAAAAAAAAAAAG	NA06986,NA06994,NA07000,NA07037,NA07346,NA07347,NA07357,NA10851,NA11829,NA11831,NA11918,NA11919,NA11920,NA11931,NA11992,NA11994,NA11995,NA12003,NA12004,NA12006,NA12044,NA12045,NA12144,NA12155,NA12156,NA12489,NA12716,NA12717,NA12749,NA12750,NA12751,NA12761,NA12763,NA12776,NA12813,NA12828,NA12891,NA12892,NA18486,NA18499,NA18501,NA18507,NA18517,NA18526,NA18532,NA18550,NA18552,NA18555,NA18558,NA18566…
1	158528081	.	8	.	ALU	+	INS	P2_MEI_332	208	SR|RP	trio	NA	.	.	.|.|.	0|0|0	0|0|0	.	.	.	7	55	44	MEI_SR,MEI_RP	40	GENE|COPA|ENSG00000122218			NA19239,NA19240
1	158767514	.	38	.	ALU	-	INS	P2_MEI_1300	187	RP	trio	NA	.	.	.|.|.	0|0|0	0|0|0	.	.	Iskow|CELL2010|FSTNXB304IE4RB	.	17	19	MEI_RP	40	.	AluYa5	TTTTCTTTTTTTTTTTTTCTTTTTTTTTTGTAGACGGAGTCTCGCTCTGTCGCCCAGGCTGGAGTGCAGTGGCGGGATCTCGGCTCACTGCAAGCTCCGCCTCCCGGGTTCACGCCATTCTCCTGCCTCAGCCTCCCAAGTAGCTGGGACTACAGGCGCCCGCCACTACGCCCGGCCTAATTTTTTGTTATTTTTAGTAGAGACGGGGGTTTCACCGTTTTAGCCGGGATGGTCTCGATCTCCTGACCTCGTGATCCGCCCGCCTCGGCCTCCCAAAGTGCTGGGATTACAGGCGTGAGCCACCGCGCCCGGCC	NA19238,NA19240
1	159201644	159201960	1	1	ALU	+	DEL	P1_M_061510_1_309&P2_M_061510_1_129	316	RP,SR	lowcov+trio	val	ASM	CEU+YRI+CHB+JPT	0.18|0.11|0.22	39|32|47	14|7|21	esv4267	.	.	15	.	.	washu,pindel_D,bc_deletion,YALEU_SR,UWASH_RP,WTSI_RP,WASHU_RP,BC_RP	.	.	AluYa5	AGGCCGGGCGCGGTGGCTCACGCCTGTAATCCCAGCACTTTGGGAGGCCGAGGTGGGCGGATCACGAGGTCAGGAGATCGAGACCATCCCGGCTAAAACGGTGAAACCCCGTCTCTACTAAAAATACAAAAAATTAGCCGGGCGTAGTGGCGGGCGCCTGTAGTCCCAGCTACTTGGGAGGCTGAGGCAGGAGAATGGCGTGAACCCGGGAGGCGGAGCTTGCAGTGAGCCGAGATCGCGCCACTGCACTCCAGCCTGGGCGACAGAGCGAGACTCCGTCTCAAAAAAAAAAAAAAAAAAAA	NA06986,NA07000,NA07037,NA07051,NA07347,NA07357,NA10847,NA10851,NA11829,NA11830,NA11881,NA11894,NA11918,NA11919,NA11920,NA11931,NA11992,NA11993,NA11994,NA11995,NA12005,NA12006,NA12044,NA12045,NA12144,NA12154,NA12155,NA12156,NA12249,NA12414,NA12489,NA12716,NA12717,NA12749,NA12750,NA12751,NA12761,NA12763,NA12776,NA18486,NA18489,NA18498,NA18499,NA18501,NA18502,NA18504,NA18505,NA18507,NA18508,NA18510…
1	160105168	.	5	.	ALU	+	INS	P1_MEI_3340	300	SR	lowcov	NA	.	CEU	0.08|.|.	13|0|0	2|0|0	.	.	.	12	2	1	MEI_SR	17	GENE|ATF6|ENSG00000118217			NA11840
1	160319289	160319609	1	1	ALU	-	DEL	P1_M_061510_1_310&P2_M_061510_1_131	320	SR,RP	lowcov+trio	val	ASM	CEU+YRI+CHB+JPT	0.11|0.23|0.08	28|44|42	6|20|7	esv2951	.	.	15	.	.	washu,wtsi,pindel_D,broad,bc_deletion,UWASH_RP,WTSI_RP,PINDEL_SR,YALEU_SR,WASHU_RP,BC_RP	.	GENE|NOS1AP|ENSG00000198929	AluYa5	TTTTTTTTTTTTTTTTTTTTTTTTTGAGACGGAGTCTCCCTCTGTCGCCCAGGCTGGAGTGCAGTGGCGGGATCTCGGCTCACTGCAAGCTCCGCCTCCCGGGTTCACGCCATTCTCCTGCCTCAGCCTCCCAAGTAGCTGGGACTACAGGCGCCCGCCACTACGCCCGGCTAATTTTTTGTATTTTTAGTAGAGACGGGGTTTCACCGTTTTAGCCGGGATGGTCTCGATCTCCTGACCTCGTGATCCGCCCGCCTCGGCCTCCCAAAGTGCTGGGATTACAGGCGTGAGCCACCGCGCCCGGCC	NA06986,NA06994,NA07000,NA07037,NA07051,NA07346,NA07347,NA07357,NA10847,NA10851,NA11829,NA11830,NA11831,NA11881,NA11894,NA11918,NA11919,NA11920,NA11931,NA11992,NA11993,NA11994,NA11995,NA12003,NA12004,NA12005,NA12006,NA12043,NA12044,NA12045,NA12144,NA12154,NA12155,NA12156,NA12249,NA12287,NA12414,NA12489,NA12716,NA12717,NA12749,NA12750,NA12751,NA12761,NA12763,NA12776,NA12813,NA12828,NA12878,NA12891…
1	160346706	.	5	.	ALU	-	INS	P1_MEI_52	217	SR|RP	lowcov	NA	.	CEU+YRI+CHB+JPT	0.04|0.28|0.16	49|38|50	4|21|16	.	.	.	17	47	61	MEI_SR,MEI_RP	40	GENE|NOS1AP|ENSG00000198929			NA06986,NA10847,NA12249,NA12287,NA12750,NA18489,NA18498,NA18501,NA18502,NA18505,NA18511,NA18519,NA18523,NA18550,NA18558,NA18566,NA18570,NA18572,NA18577,NA18579,NA18592,NA18603,NA18605,NA18856,NA18907,NA18909,NA18912,NA18916,NA18945,NA18949,NA18970,NA19099,NA19102,NA19114,NA19129,NA19225,NA19257
1	160529631	.	29	.	ALU	-	INS	P1_MEI_1412	259	RP	lowcov	NA	.	CEU+CHB+JPT	0.06|0.00|0.02	43|39|45	5|0|2	.	.	.	13	4	6	MEI_RP	20	GENE|NOS1AP|ENSG00000198929			NA11831,NA12154,NA12717,NA12763,NA18571,NA18608
1	161014147	.	93	.	ALU	+	INS	P1_MEI_1413	36	RP	lowcov	inval	7SLRNA	CEU+YRI+CHB+JPT	0.02|0.05|0.05	42|38|44	2|4|4	.	.	.	.	7	6	MEI_RP	25	GENE|DDR2|ENSG00000162733			NA12156,NA12287,NA18498,NA18507,NA18858,NA18949,NA18952,NA18956,NA19108
1	161131757	.	10	.	ALU	-	INS	P2_MEI_2216	172	SR	trio	NA	.	.	.|.|.	0|0|0	0|0|0	.	.	.	.	0	1	MEI_SR	4	.			NA12878
1	161355473	.	7	.	ALU	-	INS	P1_MEI_53&P2_MEI_1301	297	RP|SR	lowcov+trio	NA	.	CEU+YRI	0.17|0.24|.	43|34|0	15|16|0	.	.	.	16	30	33	MEI_SR,MEI_RP	6	GENE|RGS5|ENSG00000143248			NA07051,NA11829,NA11881,NA11894,NA11918,NA11920,NA11992,NA12006,NA12717,NA12750,NA12751,NA12761,NA12763,NA12878,NA12891,NA18508,NA18510,NA18522,NA18526,NA18545,NA18558,NA18576,NA18870,NA18909,NA18973,NA19093,NA19108,NA19114,NA19138,NA19147,NA19190,NA19225
1	161483863	.	10	.	ALU	+	INS	P1_MEI_3341	.	SR	lowcov	NA	.	CEU	0.05|.|.	11|0|0	1|0|0	.	.	.	.	0	1	MEI_SR	4	GENE|AL451063.2|ENSG00000232995			NA12287
1	161581048	.	3	.	ALU	+	INS	P1_MEI_54&P2_MEI_333	304	RP|SR	lowcov+trio	NA	.	CEU+YRI+CHB+JPT	0.38|0.21|0.33	53|42|48	40|18|32	.	.	Iskow|CELL2010|FSTNXB304JQX5A	21	125	73	MEI_SR,MEI_RP	80	GENE|NUF2|ENSG00000143228	AluYa5	GGCCGGGCGGCGGTGGGCTCACGGCCTGTAATCCCAGCACTTTGGGAGGCCGAGGCGGGCGGATCACGAGGTCAGGAGAGTCGAGACCATCCTGGCTAAAACGGTGAAACCCCGTCTCTACTAAAAATACAAAAAATTAGCCGGGTGTAGTGGCGGGCGCCTGTAGTCCCAGCTACTTGGGAGGCTGAGGCAGGAGAATGGCGTGAACCCGGGAGGCGGAGCTTGCAGTGAGCCGAGATCCCGCCACCTGCACTCCAGCCTGGGCGGACAGAGCGAGACTCCGGTCTCAAAAAAAACAAAAATAAAAAAAAAAAAAA	NA07000,NA07051,NA07346,NA07347,NA07357,NA10847,NA10851,NA11829,NA11830,NA11894,NA11918,NA11919,NA11920,NA11931,NA11992,NA11993,NA11994,NA12004,NA12043,NA12044,NA12144,NA12156,NA12249,NA12287,NA12489,NA12716,NA12749,NA12750,NA12751,NA12763,NA12776,NA12812,NA12814,NA12815,NA12828,NA12892,NA18505,NA18507,NA18508,NA18519,NA18520,NA18532,NA18552,NA18562,NA18563,NA18570,NA18571,NA18572,NA18573,NA18577…
1	161906300	.	9	.	ALU	+	INS	P1_MEI_55	255	SR|RP	lowcov	NA	.	.	0.00|.|.	14|0|0	0|0|0	.	.	.	.	0	1	MEI_SR,MEI_RP	14	GENE|AL355862.1|ENSG00000234077			NA12751,NA12812,NA12828,NA18563,NA18582,NA18592,NA18593,NA18609,NA18638,NA18942,NA18945,NA18951
1	162039415	.	81	.	L1	-	INS	P1_MEI_1414	6027	RP	lowcov	NA	.	YRI	0.00|0.03|0.00	42|35|40	0|2|0	.	.	.	.	3	2	MEI_RP	10	.			NA18508,NA19190
1	162506174	.	8	.	L1	+	INS	P1_MEI_1415	794	RP	lowcov	NA	.	.	0.00|.|0.00	44|0|47	0|0|0	.	.	.	10	35	15	MEI_RP	40	.			NA18504,NA18510,NA18523,NA18853,NA18861,NA18912,NA19093,NA19108,NA19114,NA19116,NA19147,NA19172,NA19257
1	162750441	.	10	.	ALU	-	INS	P2_MEI_2217	.	SR	trio	NA	.	.	.|.|.	0|0|0	0|0|0	.	.	.	.	1	0	MEI_SR	4	.			NA19240
1	163009387	.	10	.	ALU	+	INS	P1_MEI_3342	.	SR	lowcov	NA	.	CEU	0.05|.|.	11|0|0	1|0|0	.	.	.	.	0	3	MEI_SR	7	GENE|PBX1|ENSG00000185630			NA12873,NA12873
1	163798546	.	38	.	L1	?	INS	P1_MEI_1416	2130	RP	lowcov	NA	.	CHB+JPT	0.00|0.00|0.05	43|42|48	0|0|5	.	.	.	.	2	6	MEI_RP	16	GENE|AL160058.1|ENSG00000237463			NA18526,NA18562,NA18570,NA18572,NA18949
1	163819759	.	8	.	L1	-	INS	P1_MEI_56	6047	SR|RP	lowcov	val	PCR	CEU+YRI+CHB+JPT	0.12|0.01|0.18	41|40|48	10|1|17	.	.	Iskow|CELL2010|FSTNXB301B2JE2	10	8	48	MEI_SR,MEI_RP	40	.			NA07037,NA07357,NA11829,NA11919,NA11995,NA12156,NA12287,NA12489,NA12872,NA18526,NA18545,NA18550,NA18561,NA18566,NA18579,NA18603,NA18605,NA18608,NA18638,NA18943,NA18952,NA18964,NA18965,NA18980,NA19093
1	164128007	.	6	.	SVA	-	INS	P1_MEI_1417&P2_MEI_1302	1584	RP	lowcov+trio	NA	.	YRI+CHB+JPT	.|0.12|0.32	0|42|47	0|10|30	.	.	.	14	47	54	MEI_RP	80	GENE|UCK2|ENSG00000143179			NA07037,NA07357,NA10847,NA11829,NA11881,NA11919,NA11920,NA12006,NA12154,NA12156,NA12249,NA12414,NA12892,NA18498,NA18501,NA18505,NA18522,NA18526,NA18545,NA18550,NA18561,NA18562,NA18564,NA18566,NA18576,NA18577,NA18582,NA18593,NA18603,NA18638,NA18907,NA18916,NA18942,NA18944,NA18947,NA18948,NA18952,NA18953,NA18959,NA18960,NA18961,NA18964,NA18973,NA18980,NA19129,NA19138,NA19147,NA19238,NA19240
1	165772719	.	6	.	ALU	+	INS	P1_MEI_1418	171	RP	lowcov	NA	.	CEU+YRI+CHB+JPT	0.09|0.03|0.30	45|40|48	8|2|29	.	.	.	15	54	28	MEI_RP	40	GENE|CREG1|ENSG00000143162			NA07346,NA07347,NA10847,NA11829,NA11894,NA12761,NA18510,NA18542,NA18550,NA18552,NA18555,NA18561,NA18562,NA18563,NA18564,NA18566,NA18571,NA18573,NA18577,NA18582,NA18592,NA18593,NA18605,NA18608,NA18638,NA18940,NA18944,NA18959,NA18973,NA19138
1	165979486	.	10	.	ALU	-	INS	P1_MEI_3343	.	SR	lowcov	NA	.	CEU	0.06|.|.	16|0|0	2|0|0	.	.	.	.	1	0	MEI_SR	4	GENE|MPZL1|ENSG00000197965			NA11881
1	166125305	.	10	.	ALU	-	INS	P1_MEI_3344&P2_MEI_1303	101	RP|SR	lowcov+trio	NA	.	CEU	0.09|.|.	17|0|0	3|0|0	.	.	.	.	3	0	MEI_SR,MEI_RP	4	GENE|ADCY10|ENSG00000143199			NA11881,NA12043,NA19239,NA19240
1	167083614	.	45	.	ALU	-	INS	P1_MEI_1419	60	RP	lowcov	NA	.	YRI	0.00|0.03|0.00	40|38|45	0|2|0	.	.	.	9	3	2	MEI_RP	10	.			NA18516,NA18853
1	167426658	167426975	93	37	ALU	-	DEL	P1_M_061510_1_317&P2_M_061510_1_139	317	RP	lowcov+trio	NA	.	CEU+YRI+CHB+JPT	0.58|0.74|0.31	44|50|47	51|74|29	esv4017	.	.	.	.	.	bc_deletion,washu,pindel_D,wtsi,WTSI_RP,BC_RP	.	GENE|NME7|ENSG00000143156	AluYa5	TTCTTTTTTTTTTTTTTTTTTTTTTTTTTTTTTTTGAGACGGAGTCTCGCTCTGTCGCCCAGGCTGGAGTGCAGTGGCGGGATCTCGGCTCACTGCAAGCTCCGCCTCCCGGGTTCACGCCATTCTCCTGCCTCAGCCTCCCGAGTAGCTGGGACTACAGGCGCCCGCCACTACGCCCGGCTAATTTTTTGTATTTTTAGTAGAGACAGGGTTTCACCGTTTTAGCCGGGATGGTCTCGATCTCCTGACCTCGTGATCCACCCGCCTCGGCCTCCCAAAGTGCTGGGATTACAGGCGTGAGCCACCGCGCCCGGCCGC	NA06986,NA07000,NA07051,NA07346,NA07347,NA10851,NA11829,NA11830,NA11831,NA11881,NA11894,NA11918,NA11931,NA11993,NA11994,NA11995,NA12003,NA12004,NA12006,NA12044,NA12045,NA12716,NA12751,NA12828,NA12892,NA18489,NA18498,NA18505,NA18517,NA18519,NA18523,NA18526,NA18532,NA18537,NA18542,NA18545,NA18547,NA18550,NA18555,NA18558,NA18561,NA18562,NA18563,NA18564,NA18566,NA18570,NA18571,NA18572,NA18573,NA18576…
1	167605618	.	1	.	ALU	-	INS	P1_MEI_57&P2_MEI_334	293	RP|SR	lowcov+trio	val	PCR	YRI	0.00|0.09|0.00	54|43|47	0|8|0	.	.	.	13	14	16	MEI_SR,MEI_RP	80	GENE|BLZF1|ENSG00000117475	AluYa5	TTTTTTTNTTTTTTTTGAGACGGAGTCTCGCTCTGTCGCCCAGGCTGGAGTGCAGTGGCGGGATCTCGGCTCACTGCAAGCTCTGCCTCCCGGGTTCACGCCATTCTCCTGCCTCAGCCTCCCAAGTAGCTGGGACTACAGGCCGCCCGCCACTACGCCCGGCTTAATTTTTGTATTTTTAGTAGAGACGGGGTTTCACCGTTTTAGCCGGGATGGTCTTGATCTCCTGACCTCGGTGACTCCGCCCCGCCTCGGCCTCCCAAAGTGCTGGGAGTTACAGGCGTGAGCCACCGCGCCCGGCC	NA18499,NA18502,NA18510,NA18522,NA19141,NA19147,NA19190,NA19238,NA19239,NA19240
1	167709579	.	5	.	ALU	+	INS	P1_MEI_3345	292	SR	lowcov	NA	.	.	0.00|.|.	17|0|0	0|0|0	.	.	.	7	1	1	MEI_SR	15	GENE|SLC19A2|ENSG00000117479			NA18969,NA19143
1	167791493	.	9	.	L1	+	INS	P1_MEI_58&P2_MEI_1304	645	RP|SR	lowcov+trio	val	PCR	CEU+YRI+CHB+JPT	0.17|0.69|0.71	52|44|46	18|61|65	.	.	.	.	190	82	MEI_SR,MEI_RP	80	GENE|F5|ENSG00000198734			NA07000,NA07346,NA07347,NA10851,NA11829,NA11831,NA11894,NA11918,NA12003,NA12044,NA12414,NA12489,NA12717,NA12761,NA18489,NA18498,NA18499,NA18502,NA18504,NA18505,NA18508,NA18511,NA18516,NA18517,NA18519,NA18520,NA18522,NA18523,NA18537,NA18542,NA18545,NA18550,NA18552,NA18555,NA18558,NA18561,NA18562,NA18563,NA18564,NA18566,NA18570,NA18571,NA18572,NA18573,NA18576,NA18577,NA18579,NA18582,NA18592,NA18593…
1	168241738	.	10	.	L1	+	INS	P1_MEI_3346	695	SR	lowcov	NA	.	CEU	0.03|.|.	15|0|0	1|0|0	.	.	.	.	1	0	MEI_SR	4	GENE|KIFAP3|ENSG00000075945			NA12874
1	168870058	.	1	.	ALU	+	INS	P1_MEI_3347&P2_MEI_2218	297	SR	lowcov+trio	val	PCR	CEU	0.41|.|.	16|0|0	13|0|0	.	.	.	16	5	15	MEI_SR	55	GENE|Z97200.1|ENSG00000235303	AluYd8	GGCCGGGGCGCGGTGGCTCACGCCTGTAATCCCAGCACTTTGGGAGGCCGAGGCGGGCGGATCACGAGGTCAGGAGATCGAGACCACGGTGAAACCCCGTCTCTACTAAAAATACAAAAAAATTAGCCGGGCGCAGTGGCGGGCGCCTGTAGTCCCAGCTACTCGGGAGGCTGAGGCAGGAGAATGGCGTGAACCCGGAAGGCGGAGCTTGCAGTGAGCGGAGATCGCGCCACTGCACTCCCGCCTGGGCGACAGAACGAGACTCCGTCTAACAAAAAAAAAAAAAAAAAAAAAAAAAA	NA07346,NA07347,NA11840,NA11931,NA12249,NA12287,NA12814,NA12815,NA12872,NA12878,NA18970
1	168918066	.	58	.	ALU	+	INS	P1_MEI_1420&P2_MEI_1305	48	RP	lowcov+trio	NA	.	CEU+YRI+CHB+JPT	0.17|0.06|0.04	46|43|50	16|5|4	.	.	.	.	29	7	MEI_RP	8	GENE|PRRX1|ENSG00000116132			NA07000,NA11830,NA11881,NA11894,NA11918,NA12006,NA12044,NA12045,NA12144,NA12154,NA12156,NA12749,NA12751,NA12776,NA12828,NA18508,NA18532,NA18558,NA18912,NA18940,NA18945,NA19093,NA19129,NA19238,NA19240
1	169230669	.	4	.	ALU	+	INS	P1_MEI_3348&P2_MEI_335	294	RP|SR	lowcov+trio	NA	.	CEU	0.25|.|.	12|0|0	6|0|0	.	.	.	13	1	5	MEI_SR,MEI_RP	58	GENE|C1orf129|ENSG00000117501	AluYb8	GGCCGGGCGCGGTGGCTCACGCCTGTAATCCCAGCACTTTGGGAGGCCGAGGCGGGTGGATCATGAGGTCAGGAGATCGAGACCATCCTGGCTAACAAGGTGAAACCCCGTCTCTACTAAAAATACAAAAAATTAGCCGGGCGCGGTGGCGGGCGCCTGTAGTCCCAGCTACTCGGGAGGCTGAGGCAGGAGAATGGCGTGAACCCGGGAAGCGGAGCTTGCAGTGAGCCGAGATTGCGCCACTGCAGTCCGCAGTCCGGCCTGGGCGACAGAGCGAGACTCCGTCTCAAAAAAAATAAAAAAAAAAAAGAA	NA11918,NA12815,NA12873,NA12878,NA12891
1	169527843	169528165	1	1	ALU	+	DEL	P1_M_061510_1_1117&P2_M_061510_1_633	322	RP	lowcov+trio	val	ASM	CEU+YRI+CHB+JPT	1.00|0.84|1.00	44|52|54	88|87|108	.	.	.	16	.	.	wtsi,WTSI_RP,UWASH_RP	.	.	AluYa5	GGGCCGGGCGCGGTGGCTCACGCCTGTAATCCCAGCACTTTGGGAGGCCGAGGCGGGCGGATCACGAGGTCAGGAGATCGAGACCATCCCGGCTAAAACGGTGAAACCCCGTCTCTACTAAAAATACAAAAAAACTAGCCGGGCGTAGTGGCGGGCGCCTGTAGTCCCAGCTACTTGGGAGGCTGAGGCAGGAGAATGGCGTGAACCCGGGAGGCGGAGCCTCCAGTGAGCCGAGATCCCGCCACTGCACTCCAGCCTGGGCGACAGAGCGAGACTCCGTCTCAAAAAAAAAAAAAAAAAAAAAAAA	NA18498,NA18501,NA18510,NA18522,NA18909,NA18959,NA19190,NA19238,NA19238
1	169624922	.	10	.	ALU	-	INS	P1_MEI_3349	.	SR	lowcov	NA	.	CEU	0.06|.|.	16|0|0	2|0|0	.	.	.	.	1	0	MEI_SR	4	.			NA11881
1	170952789	170953102	1	1	ALU	+	DEL	P1_M_061510_1_321&P2_M_061510_1_145	313	SR,RP	lowcov+trio	val	ASM	CEU+YRI+CHB+JPT	1.00|0.74|1.00	44|53|57	88|78|114	.	.	.	16	.	.	bc_deletion,washu,wtsi,pindel_D,broad,WASHU_RP,PINDEL_SR,BC_RP,YALEU_SR,UWASH_RP	.	.	AluY	AGGCCGGGCGCGGTGGCTCACGCCTGTAATCCCAGCACTTTGGGAGGCCGAGGCGGGCGGATCACGAGGTCAGGAGATCGAGACCATCCTGGCTAACACGGTGAAACCCCGTCTCTACTAAAAATACAAAAAATTAGCCGGGCGTGGTAGCGGGCGCCTGTAGTCCCAGCTACTCGGGGAGGCTGAGGCAGGAGAATGGCGTGAACCCGGGAGGCGGAGCTTGCAGTGAGCCGAGATCGCGCCACTGCACTCCAGCCTGGGCGACAGAGCGAGACTCCGTCTCAAAAAAAAAAAAAAA	NA06994,NA11918,NA12489,NA12749,NA12776,NA12813,NA18486,NA18489,NA18498,NA18502,NA18505,NA18507,NA18510,NA18511,NA18516,NA18519,NA18522,NA18571,NA18871,NA18907,NA18912,NA18947,NA18967,NA18968,NA18971,NA18972,NA18974,NA18975,NA18976,NA18981,NA19005,NA19098,NA19108,NA19119,NA19131,NA19137,NA19144,NA19147,NA19152,NA19153,NA19159,NA19160,NA19171,NA19200,NA19201,NA19204,NA19207,NA19209,NA19210,NA19238…
1	171124218	.	10	.	L1	+	INS	P1_MEI_3350	3128	SR	lowcov	NA	.	.	0.00|.|.	15|0|0	0|0|0	.	.	.	.	1	0	MEI_SR	4	GENE|AL031599.1|ENSG00000224228			NA19143
1	172211360	172211690	1	1	ALU	+	DEL	P1_M_061510_1_324&P2_M_061510_1_146	330	RP,SR	lowcov+trio	val	ASM	CEU+YRI	0.85|0.27|.	44|30|0	75|16|0	esv4673	.	.	18	.	.	bc_deletion,pindel_D,broad,washu,wtsi,YALEU_SR,UWASH_RP,WASHU_RP,PINDEL_SR,BC_RP	.	GENE|RC3H1|ENSG00000135870	AluYa5	GGCCGGGCGCGGTGGCTCACGCCTGTAATCCCAGCACTTTGGGAGGCCGAGGCGGGCGGATCACGAGGTCAGGAGATCGAGACCATCCTGGCTAACAAGGTGAAACCCCGTCTCTACTAAAAATACAAAAAATTAGCCGGGCGTAGTGGCGGGCGCCTGTAGTCCCAGCTACTTGGGAGGCTGAGGCAGGAGAATGGCGTGAACCCGGGAGGCGGAGCTTGCAGTGAGCCGAGATCCCGCCACTGCACTCCAGCCTGGGCGACAGAGCGAGACTCCGTCTCAAAAAAAAAAAAAAAAAAAAAAAAAAAAAAAA	NA06994,NA07037,NA11829,NA11881,NA11894,NA11993,NA11995,NA12006,NA12044,NA12045,NA12144,NA12154,NA12156,NA12287,NA12414,NA12489,NA12751,NA12763,NA12776,NA12813,NA18486,NA18489,NA18498,NA18499,NA18501,NA18502,NA18504,NA18505,NA18507,NA18508,NA18510,NA18511,NA18516,NA18517,NA18519,NA18520,NA18522,NA18523,NA18532,NA18537,NA18542,NA18545,NA18547,NA18561,NA18563,NA18564,NA18566,NA18570,NA18571,NA18572…
1	172599623	.	1	.	ALU	-	INS	P1_MEI_3351&P2_MEI_336	302	RP|SR	lowcov+trio	NA	.	CEU	0.25|.|.	18|0|0	9|0|0	.	.	.	14	16	3	MEI_SR,MEI_RP	75	GENE|RABGAP1L|ENSG00000152061	AluYb8	TTCTTTTTTTTTTTTTTTTTTTTTTTGTAGACGGAGTCTCGCTCTGTCGCCCAGGCCGGACTGCGGACTGCAGTGGCGCAATCTCGGCTCACTGCAAGCTCTGCTTCCCGGGTTCACGCCATTCTCCCTGCCTCAGCCTCCCGAGTAGCTGGGACTACAGGCGCCTGCCACCGCGCCCGGCTGATTTTTTGTATTTTTTAGTAGAGACGGGGTTTCACCTTGTTAGCCAGGATGGTCTCGATCGTCCTGACCTCGTGATCCACCCGCCTCGGCCTCCCAAAGTGCTGGGATTACAGGCGTGAGCCACCGCGCCCGGCC	NA11840,NA12812,NA12814,NA12815,NA12873,NA12878,NA12891
1	172751261	.	5	.	ALU	-	INS	P1_MEI_59	295	SR|RP	lowcov	NA	.	CEU+YRI+CHB+JPT	0.03|0.03|0.02	51|40|45	3|2|2	.	.	.	7	4	7	MEI_SR,MEI_RP	40	GENE|RABGAP1L|ENSG00000152061	AluYb8	TTTTTTTTNTTTTTTTTTTTTTTGAGACGGAGTCTCGCTCTGTTGCCCAGGCCGGACTGCGGACTGCAATGGCGCAATCTCGGCTCACTGCAAGCTCCGCTTCCTGGGTTCACGCCATTCTCCTGCCTCAGCCTCCCGAGTAGCTGGGACTACAGGCCGCCCGCCACCGCGCCCGGCTTAATTTTTTGTTATTTTTAGTAGAGACGGGGTTTCACCTTGTTAGCCAGGATGGTCTCGATCTCCTGACCTCGTGATCCACCCGCCTCGGCCTCCCAAAGTGCTGGGATTACAGGCGTGAGCCACCGCGCCCGGCC	NA11894,NA12776,NA18511,NA18526,NA18853
1	175538590	.	10	.	L1	+	INS	P2_MEI_2219	5398	SR	trio	NA	.	.	.|.|.	0|0|0	0|0|0	.	.	.	.	1	0	MEI_SR	4	.			NA12878
1	176252964	.	60	.	ALU	-	INS	P1_MEI_1421	35	RP	lowcov	NA	.	YRI	0.00|0.01|0.00	43|35|43	0|1|0	.	.	.	.	2	2	MEI_RP	8	GENE|SEC16B|ENSG00000120341			NA18907
1	176664222	.	1	.	ALU	-	INS	P1_MEI_3352&P2_MEI_2220	296	SR	lowcov+trio	NA	.	CEU	0.19|.|.	13|0|0	5|0|0	.	.	Xing|GR2009|1104685261669	17	4	4	MEI_SR	37	GENE|RASAL2|ENSG00000075391	AluY	TTTTTTTTTTTTTTTGTAGACGGAGTCTCGCTCTGTCGCCCAGGCTGGAGTGCAGTGGCGCGATCTCGGCTCACTGCAAGCTCCGCCTCCCGGGTTCACGCCATTCTCCTGCCTCAGCCTTCCCGAGTAGCTGGGACTACAGGCGCCCGCTACCACGCCCGGCTAATTTTTTGTATTTTTAGTAGAGACGGGGTTTCACCGTGTTAGCCAGAATGGTCTCGATCTCCTGACCTCGTGATCCGCCCGCCTCGGCCTCCCAAAGTGCTGGGATTACAGGCGTGAGCCACCGCGCCCGGCC	NA11931,NA12043,NA12873,NA19141,NA19240
1	177214792	.	10	.	ALU	+	INS	P1_MEI_3353	.	SR	lowcov	NA	.	.	.|.|.	0|0|0	0|0|0	.	.	Iskow|CELL2010|FSTNXB304H5KG7	.	0	13	MEI_SR	25	.	AluYa5	GGCCGGGCGCGGTGGCTCACGCCTGTAATCCCAGCACTTTGGGGAGGCCGAGGCGGGCGGATCACGAGGTCAAGAGATCGAGACCATCCCCGGCTAAAAACGGTGAAACCCCGTCTCTACTAAAAATACAAAAAAAATTAAGCCGGGCGTAGTGGCGGGCGGCCTGTAGTCCCAGCTACTTGGGAGGACTGAGGCAGGAGAATGGTGTGAACCCGGGAGGCGGAGCTTGCAGTGAGCCGAGATCCCGCCACTGCACTCCAGCCTGGGCGACAGAGCGAGACTCCGTCTACAAAAAAAAAAAAAAAAAANAAAAGAAA	NA11881,NA12287,NA07347,NA12234,NA12873,NA11918,NA12043,NA12874
1	177758574	.	10	.	ALU	+	INS	P1_MEI_60	289	SR|RP	lowcov	NA	.	YRI+CHB+JPT	.|0.09|0.46	0|40|46	0|7|42	.	.	.	.	94	19	MEI_SR,MEI_RP	40	GENE|C1orf125|ENSG00000162779			NA07037,NA07051,NA07347,NA07357,NA10847,NA11918,NA11919,NA11931,NA12004,NA12043,NA12045,NA12287,NA12717,NA12749,NA12776,NA12812,NA12815,NA12873,NA12874,NA18501,NA18507,NA18526,NA18532,NA18537,NA18547,NA18552,NA18558,NA18562,NA18564,NA18570,NA18572,NA18573,NA18576,NA18577,NA18579,NA18582,NA18593,NA18603,NA18605,NA18638,NA18853,NA18907,NA18943,NA18945,NA18948,NA18949,NA18953,NA18959,NA18964,NA18965…
1	178450469	178450792	1	1	ALU	-	DEL	P1_M_061510_1_332&P2_M_061510_1_676	321	RP,SR	lowcov+trio	val	ASM	CEU+YRI+CHB+JPT	0.59|0.77|0.57	22|35|14	26|54|16	esv8585	.	.	.	.	.	pindel_D,wtsi,washu,bc_deletion,WTSI_RP	.	.	AluYh9	TTTTTTTTTTTTTTTTTTTTTTTTGAGACGGAGTCTCGCTCTGTCGCCCAGGCTGGAGTGCAGTGGCGCGACCTCGGCTCACTGCAAGCTCCGCCTCCCGGGTTCACGCCATTCTCCTGCCTCAGCCTCCCGAGTAGCCGGGACCACAGGCGCCCGCCACCACGCCCGGCTAATTTTTTGTATTTTTAGTAGAGGCGGGGTTTCACCGCGTTAGCCAGGATGGTCTCGATCTCCTGACCTCATGATCCGCCCGCCTCTGCCTCCCAAAGTGCTGGGATTACAGGCGTGAGCCACCGCGCCCGGCCTATTGTGTAATCTTTAAGG	NA06986,NA07037,NA07051,NA07346,NA07347,NA07357,NA10847,NA10851,NA11830,NA11831,NA11881,NA11931,NA11992,NA11994,NA12003,NA12045,NA12249,NA12287,NA12414,NA12489,NA12716,NA12717,NA12750,NA12751,NA12761,NA12878,NA12891,NA12892,NA18486,NA18499,NA18501,NA18505,NA18508,NA18510,NA18519,NA18520,NA18522,NA18523,NA18532,NA18545,NA18550,NA18555,NA18562,NA18566,NA18570,NA18571,NA18572,NA18576,NA18577,NA18592…
1	178559612	178559936	1	1	ALU	-	DEL	P1_M_061510_1_334&P2_M_061510_1_154	324	SR,RP	lowcov+trio	val	ASM	CEU+YRI+CHB+JPT	0.14|0.02|0.02	35|51|57	10|2|2	esv5032	.	.	15	.	.	bc_deletion,wtsi,pindel_D,washu,WASHU_RP,UWASH_RP,BC_RP,WTSI_RP,YALEU_SR,PINDEL_SR	.	GENE|ACBD6|ENSG00000135847	AluYb8	TTTTTTTTTTTTTTTTTTTTTTGAGACGGAGTCTCGCTCTGTCGCCCAGGCCGGACTGCGGACTGCAGTGGCGCAATCTCGGCTCACTGCAAGCTCCGCTTCCCGGGTTCACGCCATTCTCCTGCCTCAGCCTCCCGAGTAGCTGGGACTACAGGCGCCCGCCACCGCGCCCGGCTAATTTTTTGTATTTTTAGTAGAGACGGGGTTTCACCTTGTTAGCCAGGATGGTCTCGATCTCCTGACCTCATGATCCACCCGCCTCGGCCTCCCAAAGTGCTGGGATTACAGGCGTGAGCCACCGCGCCCGGCC	NA07000,NA07037,NA07051,NA07346,NA07347,NA07357,NA10847,NA10851,NA11829,NA11830,NA11831,NA11881,NA11894,NA11919,NA11920,NA11992,NA11993,NA11994,NA12004,NA12006,NA12043,NA12044,NA12045,NA12144,NA12154,NA12155,NA12156,NA12249,NA12287,NA12414,NA12716,NA12717,NA12749,NA12750,NA12751,NA12761,NA12763,NA12776,NA12828,NA12891,NA12892,NA18486,NA18489,NA18498,NA18499,NA18501,NA18502,NA18504,NA18505,NA18508…
1	178960365	.	31	.	ALU	+	INS	P1_MEI_1422	275	RP	lowcov	NA	.	YRI	0.00|0.03|0.00	42|36|45	0|2|0	.	.	.	.	4	2	MEI_RP	12	GENE|XPR1|ENSG00000143324			NA18508,NA19147
1	179124172	.	1	.	ALU	+	INS	P1_MEI_61&P2_MEI_337	293	RP|SR	lowcov+trio	val	PCR	CEU+YRI	0.25|0.23|.	53|45|0	27|21|0	.	dbRIP_Alu_00009	.	14	93	60	MEI_SR,MEI_RP	80	UTR|XPR1|ENSG00000143324	AluYa5	GGCCGGGCGCGGTGGCTCACGCCTGTAATTCCAGCACTTTGGGAGGCCGAGGCGGGGCGGATCACGAGGTCAGGAGATCGAGACCATCCCGGCTAAAAACGGTGAAAACCCCGTTCTCTACTAAAAATACAAAAAATTAGCCGGGCGTAGTGGCGGGCGGCCTGTAGTCCCAGCTACTTGGGAGGCTAGAGGCAGGAGAATGGCGTGAACCCGGGAGGGCAGAGCTTGCAGTGAGCCGAGATCCCGCCACTGCACTCCAGCCTGGGCGACAGAGCGAGACTCCGT	NA06986,NA07037,NA07347,NA07357,NA10847,NA11829,NA11918,NA11919,NA11920,NA11931,NA11992,NA11994,NA12003,NA12004,NA12043,NA12044,NA12144,NA12154,NA12156,NA12249,NA12716,NA12750,NA12763,NA12812,NA12814,NA12815,NA12872,NA12874,NA12892,NA18499,NA18501,NA18505,NA18507,NA18517,NA18519,NA18520,NA18537,NA18547,NA18555,NA18558,NA18561,NA18562,NA18570,NA18577,NA18582,NA18608,NA18861,NA18870,NA18907,NA18943…
1	179314030	.	1	.	ALU	+	INS	P1_MEI_3354&P2_MEI_338	296	RP|SR	lowcov+trio	NA	.	.	.|.|.	0|0|0	0|0|0	.	.	Xing|GR2009|1104685260820	17	3	11	MEI_SR,MEI_RP	75	.	AluY	GGCCGGGCGCGGTGGCTCACGCCTGTAATCCCAGCACTTTGGGAGGCCGAGGCGGGCGGATCACGAGGTCAGGAGATCGAGACCATCCTGGCTAACACGGTGAAACCCCCGTCTCTACTAAAAAAAAATACAAAAAAATTAGCCGGGCGTGGTAGCGGGCGCCTGTAGTCCCAGCTACTCGGGAAGGCTGAGGCAGGAGAATGGCGTGAACCCGGGAGGCGGAGCTTGCAGTGAGCCGAGATCGCGCCACTGCACTCCAGCCTGGGCGACAGAGCGAGACTCCGTCTACAAAAAAAAAAAAAAAAAACAAAA	NA11894,NA12045,NA12812,NA12874,NA12878,NA12891,NA19143,NA19238,NA19239,NA19240
1	179854969	.	1	.	ALU	-	INS	P1_MEI_62&P2_MEI_339	305	RP|SR	lowcov+trio	val	PCR	CHB+JPT	.|.|0.01	0|0|48	0|0|1	.	.	.	17	20	28	MEI_SR,MEI_RP	80	GENE|CACNA1E|ENSG00000198216	AluYb8	TTTTTTTTTNTTTTTTTTTTTTTTGTAGACGGAGTCTCGCTCTGTCGCCCAGGCCGGACTGCGGACTGCAGTGGCGCAATCTCGGCTCACTGCAAGCTCCGCTTCCCGGGTTCACGCCATTCTCCTGCCTCAGCCTCCCGAGTAGCTGGGACTACAGGCGCCCGCCACCGCGCCCGGCTAATTTTTGTATTTTTAGTAGAGACGGGGTTTCACCTTGTTAGCCAGGATGGTCTCGATCTCCTGACCTCATGATCCACCCGCCTCGGCCTCCCAAAGTGCTGGGATTACAGGCGTGAGCCACCGCGCCCGGCC	NA07000,NA07037,NA07347,NA11920,NA12004,NA12006,NA12155,NA12489,NA12815,NA12878,NA12891,NA18502,NA18510,NA18519,NA18566,NA18912,NA19129,NA19225
1	179867896	.	5	.	ALU	-	INS	P1_MEI_63&P2_MEI_1307	192	RP|SR	lowcov+trio	val	PCR	CEU+YRI	0.07|0.17|0.00	55|45|49	8|15|0	.	.	.	13	15	25	MEI_SR,MEI_RP	80	GENE|CACNA1E|ENSG00000198216	AluYa5	GCCCGGCTAATTTTTTTGTATTTTTTAGTAGAGACGGGGTTTCACCGTTTTTTAGCCGGGATGGTCTCGATCTCCTGACCTCGTGATCCGCCCGCCTCGGCCTCCCAAAGTG	NA07000,NA07037,NA11920,NA12004,NA12006,NA12155,NA12489,NA12815,NA12878,NA12891,NA18502,NA18508,NA18510,NA18516,NA18517,NA18519,NA18520,NA18916,NA19129,NA19137,NA19225
1	180174604	.	10	.	ALU	-	INS	P1_MEI_3355	.	SR	lowcov	NA	.	CEU	0.12|.|.	13|0|0	3|0|0	.	.	.	.	2	0	MEI_SR	5	.			NA12234,NA07346
1	180555947	180556259	1	1	ALU	-	DEL	P1_M_061510_1_335&P2_M_061510_1_156	312	SR,RP	lowcov+trio	val	ASM	CEU+YRI+CHB+JPT	0.92|0.63|0.77	44|52|57	81|66|88	esv8519	.	.	10	.	.	wtsi,broad,washu,bc_deletion,pindel_D,WTSI_RP,BC_RP,YALEU_SR,UWASH_RP,WASHU_RP,PINDEL_SR	.	.	AluYa5	TTTTTTTTTTTTTTTTTTTTTTGAGGCGGAGTCTCGCTCTGTCGCCCAGGCTGGAGTGCAGTGGCGGGATCTCGGCTCACTGCAAGCTCCGCCTCCCGGGTTCATGCCATTCTCCTGCCTCAGCCTCCCAGGTAGCTGGGACTACAGGCGCCCGCCACTACGCCCGGCTAATTTTTTGTATTTTTAGTAGAGACGGGGTTTCACCGTTTTAGCCGGGATGGTCTCGATCTCCTGACCTCGTGATTCGCCCGCCTCGGCCTCCCAAAGTGCTGGGATTACAGGCGTGAGCCACCGCGCCCGGCC	NA06994,NA10847,NA11894,NA11919,NA11920,NA11931,NA11992,NA11993,NA11994,NA11995,NA12003,NA12006,NA12043,NA12144,NA12414,NA12716,NA12717,NA12749,NA12751,NA12761,NA12763,NA12813,NA12828,NA12878,NA12891,NA18486,NA18498,NA18499,NA18508,NA18511,NA18516,NA18517,NA18520,NA18523,NA18532,NA18537,NA18550,NA18558,NA18562,NA18564,NA18571,NA18572,NA18576,NA18582,NA18592,NA18609,NA18638,NA18856,NA18858,NA18870…
1	180687463	.	1	.	ALU	-	INS	P1_MEI_3356&P2_MEI_340	294	RP|SR	lowcov+trio	val	PCR	CEU	0.30|.|.	15|0|0	9|0|0	.	.	Iskow|CELL2010|FSTNXB304H2ZH5	16	14	3	MEI_SR,MEI_RP	71	GENE|RGSL1|ENSG00000121446	AluYa5	TTTTTTTTTGTTTTTTTTTTTTTTTTTTTGTTAGACGGAGTCTCGCTCTGTCGCCCAGGCTGGAGTGCAGTGGCGCAATCTCGGCTCACTGCAAGCTCCGCCTCCCGGGTTCACGCCATTCTCCTGCCTCAGCCTCCCAAGTAGCTGGGACTACAGGCGCCCGCCACTACGCCCGGCTAATTTTTTGTATTTTTAGTAGAGACGGGGTTTCACCGTTTTAGCCGGGATGGTCTCGATCTCCTGACCTCGTGATCCGCCCGCCTCGGCCTCCCAAAGTGCTGGGATTACAGGCGTGAGCCACCGCGCCCGGC	NA07347,NA11931,NA12812,NA12815,NA12872,NA12878,NA12891,NA19238
1	181218629	181218930	1	1	ALU	-	DEL	P1_M_061510_1_336&P2_M_061510_1_157	301	SR,RP	lowcov+trio	val	ASM	CEU+YRI+CHB+JPT	0.85|0.35|0.54	43|41|56	73|29|60	esv4413	.	.	17	.	.	bc_deletion,broad,washu,wtsi,pindel_D,UWASH_RP,PINDEL_SR,BC_RP,WASHU_RP,YALEU_SR,WTSI_RP,YALEU_SR	.	.	AluYg6	TTTTTTTTTTTTTTTTTTTTTTTTGAGACGGAGTTTCGCTCTGTCGCCCAGGCTGGAGTGCAGTGGCGCAATCTCGGCTCACTGCAAGCGCCATTCTCCTGCCTCAGCCTCCCGTGTAGCTGGGACTACAGGCGCGCGCCACCATGCCCGGCTAATTTTTGTATTTTTAGTAGAGACGGGGTTTCACCGTGTTAGCCAGGATGGTCTCGATCTCCTGACCACGTGATCCGCCCGTCTCGGCCTCCCAAAGTGCTGGGATTACAGGCGTGAGCCACCGCGCCCGGC	NA06994,NA07037,NA07051,NA11831,NA11894,NA11993,NA12043,NA12044,NA12045,NA12249,NA12414,NA12489,NA12749,NA12751,NA12813,NA12828,NA12892,NA18486,NA18489,NA18498,NA18499,NA18502,NA18504,NA18505,NA18510,NA18511,NA18516,NA18517,NA18519,NA18520,NA18522,NA18523,NA18537,NA18545,NA18552,NA18561,NA18562,NA18564,NA18566,NA18570,NA18571,NA18572,NA18573,NA18576,NA18577,NA18579,NA18592,NA18593,NA18603,NA18605…
1	182425001	.	10	.	ALU	+	INS	P1_MEI_3357	.	SR	lowcov	NA	.	.	0.00|.|.	15|0|0	0|0|0	.	.	.	.	0	3	MEI_SR	7	.			NA19143
1	182545359	182545666	73	76	ALU	+	DEL	P1_M_061510_1_643	307	RP	lowcov	NA	.	.	.|.|.	0|0|0	0|0|0	.	.	.	.	.	.	broad	.	.	AluYa5	GATGGCCGGGCGCGGTGGCTCACGCCTGTAATCCCAGCACTTTGGGAGGCCGAGGCGGGCGGATCACGAGGTCAGGAGATCGAGACCATCCCAGCTAAAACGGTGAAACCCCGTCTCTACTAAAAATACAAAAAATTAGCCGGGCGTAGTGGCGGGCACCTGTAGTCCCAGCTACTTGGGAGGCTGAGGCAGGAGAATGGCGTGAACCCGGGAGGCGGAGCTTGCAGTGAGCCGAGATCCCGCCACTGCACTCCAGCCTGGGCGACAGAGCGAGACTCCGTCTCAAAAAAAAAAAAAAAAAAAAAAAA	NA06994,NA07346,NA11919,NA11995,NA12003,NA12155,NA12156,NA12749,NA12750,NA12776,NA12813,NA18486,NA18489,NA18498,NA18499,NA18504,NA18507,NA18516,NA18519,NA18550,NA18566,NA18577,NA18603,NA18858,NA18870,NA18871,NA18912,NA18942,NA18943,NA18944,NA18945,NA18961,NA18967,NA18968,NA18971,NA18972,NA18974,NA18975,NA18976,NA18980,NA18981,NA19005,NA19098,NA19108,NA19119,NA19131,NA19137,NA19144,NA19152,NA19153…
1	182589497	.	64	.	ALU	+	INS	P1_MEI_1423	67	RP	lowcov	inval	7SLRNA	YRI	.|0.29|.	0|26|0	0|15|0	.	.	.	.	27	3	MEI_RP	40	.			NA11831,NA11931,NA12044,NA12156,NA12287,NA12489,NA18499,NA18511,NA18853,NA18858,NA18916,NA18947,NA18949,NA18951,NA18956,NA18961,NA18965,NA19005,NA19099,NA19108,NA19114,NA19190,NA19225
1	183058884	.	10	.	L1	-	INS	P1_MEI_3358	.	SR	lowcov	NA	.	CEU	0.04|.|.	14|0|0	1|0|0	.	.	.	.	1	0	MEI_SR	4	GENE|FAM129A|ENSG00000135842			NA12812
1	183081351	183087407	1	1	L1	+	DEL	P1_M_061510_1_337&P2_M_061510_1_22	6056	SR,RP	lowcov+trio	val	ASM	CEU+YRI+CHB+JPT	0.58|0.34|0.69	32|32|47	37|22|65	nsv436157	.	.	15	.	.	pindel_D,bc_deletion,wtsi,washu,broad,yale_solid,AB_RP,YALEU_SR,WTSI_RP,PINDEL_SR,YALEU_RP,BC_RP,WASHU_RP,UWASH_RP	.	GENE|FAM129A|ENSG00000135842	L1HS	GGGAATGTGGAGCCAAGATGGCCGAATAGGAACAGCTCCGGTCTACAGATCCCAGCGTAAGCGACGCAGAAGACGGGTGATTTCTGCATTTCCATCTGAGGTACCGGGTTCATCTCACTAGGGAGTGCCAGACAGTGGGCGCAGGCCAGTGTGTGTGCGCACCGTGCGCGAGCCGAAGCAGGGCGAGGCATTGCCTCACCTGGGAAGCGCAAGGGGTCAGGGAGTTCCCTTTCCGAGTCAAAGAAAGGGGTGACGGACGCACCTGGAAAATCGGGTCACTCCCACCCGAATATTGCGCTTTTCAGACCAGCTTAAGAAACGGCGCACCACGAGACTATATCCCACACCTGGCTCAGAGGGTCCTACGCCCACGGAATCTCGCTGATTGCTAGCACAGCA…	NA06986,NA07000,NA07037,NA07051,NA07346,NA07357,NA10847,NA10851,NA11829,NA11830,NA11831,NA11881,NA11920,NA11931,NA11993,NA11994,NA11995,NA12003,NA12005,NA12044,NA12045,NA12144,NA12154,NA12155,NA12156,NA12249,NA12287,NA12750,NA12751,NA12763,NA12828,NA12878,NA12891,NA12892,NA18486,NA18489,NA18498,NA18501,NA18502,NA18505,NA18507,NA18508,NA18510,NA18511,NA18516,NA18517,NA18519,NA18520,NA18522,NA18523…
1	183203660	183203982	1	1	ALU	+	DEL	P1_M_061510_1_338&P2_M_061510_1_158	322	RP,SR	lowcov+trio	val	ASM	CEU+YRI+CHB+JPT	0.22|0.31|0.51	44|50|57	19|31|58	esv4945	.	.	16	.	.	wtsi,broad,yale_sr,bc_deletion,washu,pindel_D,YALEU_SR,WASHU_RP,UWASH_RP,BC_RP,WTSI_RP,PINDEL_SR	.	GENE|FAM129A|ENSG00000135842	AluYb9	CGGCCGGGCGCGGTGGCTCACGCCTGTAATCCCAGCACTTTGGGAGGCCGAGGCGGGTGGATCATGAGGTCAGGAGATCGAGACCATCCTGGCTAACAAGGTGAAACCCCGTCTCTACTAAAAATACAAAAAATTAGCCGGGCGCGGTGGCGGGGGCCTGTAGTCCCAGCTACTGGGGAGGCTGAGGCAGGAGAATGGCGTGAACCCGGGAAGCGGAGCTTGCAGTGAGCCGAGATTGCGCCACTGCAGTCCGCAGTCCGGCCTGGGCGACAGAGCGAGACTCCGTCTCAAAAAAAAAAAAAAAAAA	NA06986,NA06994,NA07000,NA07037,NA07051,NA07347,NA07357,NA10847,NA10851,NA11829,NA11830,NA11831,NA11881,NA11894,NA11918,NA11920,NA11931,NA11992,NA11993,NA11994,NA11995,NA12003,NA12004,NA12006,NA12043,NA12044,NA12045,NA12144,NA12154,NA12155,NA12156,NA12249,NA12287,NA12414,NA12489,NA12716,NA12717,NA12749,NA12750,NA12751,NA12761,NA12763,NA12776,NA12828,NA12878,NA12891,NA12892,NA18486,NA18489,NA18498…
1	183217084	.	5	.	ALU	+	INS	P1_MEI_64&P2_MEI_1308	273	RP|SR	lowcov+trio	NA	.	CEU+YRI	0.06|0.12|0.00	50|38|45	6|9|0	.	.	.	11	19	7	MEI_SR,MEI_RP	80	.	AluY	GGCCGGGCGCGGTGGCTCACGCCTGTAATCCCAGCACTTTGGGAGGCCGAGGCGGGCGGATCACGAGGTCAGGGAGATCGAGACCATCCTGGCTAACACGGTGAAACCCCGTCTCTACTAAAAATCAAAAAATTAGCCGGGCGTAGTGGCGGGCGCCTGTAGTCCCAGCTACTCGGGAAGGACTGAGGCAGGAGAATGGCGTGAACCCGAGAGGCGGAGCTTGCAGTGAGCCGAGATTGCGCCACTGCACTCCAGCCTGGGGCGACAGGAGCGAGACTCCGTCTACAAAAAAAAAAAAAATAAAA	NA07037,NA10847,NA11931,NA12004,NA12044,NA12828,NA12874,NA18498,NA18508,NA18517,NA18858,NA19099,NA19147,NA19239,NA19240
1	183639719	183640057	1	1	ALU	+	DEL	P1_M_061510_1_340&P2_M_061510_1_160	338	SR,RP	lowcov+trio	val	ASM	CEU+YRI+CHB+JPT	0.43|0.47|0.69	34|29|48	29|27|66	esv6466	.	.	10	.	.	washu,bc_deletion,pindel_D,wtsi,BC_RP,YALEU_SR,WTSI_RP,UWASH_RP,WASHU_RP	.	.	AluYb8	CGGCCGGGCGCGGTGGCTCACGCCTGTAATCCCAGCACTTTGGGAGGCCGAGGCGGGTGGATCATGAGGTCAGGAGATCGAGACCATCCTGGCTAACAAGGTGAAACCCCGTCTCTACTAAAAATACAAAAAATTAGCTGGGCGCGGTGGCAGGCGCCTGTAGTCCCAGCTACTCGGGAGGCTGAGGCAGGAGAATGGCGTGAACCCGGGAAGCGGAGCTTGCAGTGAGCCGAGATTGCGCCACTGCAGTCCGCAGTCCGGCCTGGGCGACAGAGCGAGACTCCGTCTCAAAAAAAAAAAAAAAAAAAAAAAAACAAAACAAAAAAAAA	NA06986,NA07000,NA07037,NA07051,NA07347,NA10851,NA11831,NA11894,NA11919,NA11992,NA11994,NA11995,NA12003,NA12005,NA12043,NA12044,NA12045,NA12144,NA12717,NA12749,NA12750,NA12751,NA12761,NA12763,NA12878,NA12891,NA18486,NA18505,NA18507,NA18508,NA18510,NA18517,NA18519,NA18522,NA18523,NA18532,NA18542,NA18545,NA18552,NA18563,NA18570,NA18576,NA18579,NA18582,NA18593,NA18605,NA18609,NA18856,NA18858,NA18870…
1	183771325	.	6	.	ALU	+	INS	P1_MEI_1424&P2_MEI_341	302	RP|SR	lowcov+trio	val	PCR	CEU+YRI	0.03|0.08|.	43|38|0	3|6|0	.	.	.	15	20	15	MEI_SR,MEI_RP	80	.			NA11992,NA12878,NA12892,NA18523,NA18547,NA18552,NA18562,NA18564,NA18570,NA18571,NA18592,NA18608,NA18861,NA18944,NA18945,NA18948,NA18961,NA18964,NA19114,NA19238,NA19257
1	183828807	.	31	.	ALU	-	INS	P1_MEI_1425	217	RP	lowcov	NA	.	.	0.00|.|0.00	41|0|45	0|0|0	.	.	.	10	5	4	MEI_RP	18	.			NA18489,NA18498,NA18499,NA18871
1	184033433	184033756	1	1	ALU	+	DEL	P1_M_061510_1_342&P2_M_061510_1_161	322	RP	lowcov+trio	val	ASM	CEU+YRI+CHB+JPT	1.00|0.61|0.98	44|53|57	88|65|112	.	.	.	.	.	.	wtsi,broad,bc_deletion,WASHU_RP,UWASH_RP,BC_RP	.	GENE|HMCN1|ENSG00000143341	AluYa5	TTGTTTTGGCCGGGCGCGGTGGCTCACGCCTGTAATCCCAGCACTTTGGGAGGCCGAGGCGGGCGGATCACGAGGTCAGGAGATCGAGACCATCCCGGCTAAAACGGTGAAACCCCGTCTCTACTAAAAATACAAAAAATTAGCCGGGCGTAGTGGCGGGCGCCTGTAGTCCCAGCTACTTGGGAGGCTGAGGCAGGAGAATGGTGTGAACCCGGGAGGCGGAGCTTGCAGTGAGCCGAGATCCCGCCACTGCACTCCAGCCTGGGCGACAGAGCGAGACTCCGTCTCAAAAAAAAAAAAAAAAAAAAAAAAAAAAAAAGACTT	NA11931,NA12043,NA12045,NA12155,NA12489,NA18489,NA18498,NA18499,NA18501,NA18502,NA18507,NA18510,NA18511,NA18519,NA18520,NA18522,NA18523,NA18532,NA18577,NA18605,NA18853,NA18856,NA18858,NA18870,NA18871,NA18912,NA18942,NA18943,NA18959,NA18967,NA18968,NA18971,NA18972,NA18974,NA18976,NA18980,NA18981,NA19098,NA19099,NA19102,NA19108,NA19116,NA19119,NA19131,NA19137,NA19144,NA19152,NA19153,NA19159,NA19160…
1	185448923	.	10	.	L1	-	INS	P2_MEI_2221	.	SR	trio	NA	.	.	.|.|.	0|0|0	0|0|0	.	.	.	.	1	0	MEI_SR	4	GENE|AL391065.1|ENSG00000236030			NA19240
1	185708453	.	10	.	L1	-	INS	P1_MEI_3359	1956	SR	lowcov	NA	.	CEU	0.03|.|.	16|0|0	1|0|0	.	.	.	.	0	1	MEI_SR	4	GENE|AL391813.1|ENSG00000231599			NA12872
1	185763886	.	34	.	L1	+	INS	P2_MEI_1309	6009	RP	trio	NA	.	.	.|.|.	0|0|0	0|0|0	.	.	.	.	7	5	MEI_RP	23	.			NA19238
1	186160482	.	10	.	L1	-	INS	P1_MEI_3360	.	SR	lowcov	NA	.	CEU	0.04|.|.	13|0|0	1|0|0	.	.	.	.	1	0	MEI_SR	4	.			NA12873
1	186222016	.	35	.	ALU	+	INS	P1_MEI_1426	288	RP	lowcov	NA	.	YRI	0.00|0.03|0.00	41|39|47	0|2|0	.	.	.	.	6	4	MEI_RP	20	.			NA18505,NA19147
1	186441264	.	7	.	ALU	-	INS	P1_MEI_1427&P2_MEI_342	133	RP|SR	lowcov+trio	val	PCR	YRI+CHB+JPT	.|0.01|0.05	0|35|38	0|1|4	.	.	.	16	4	13	MEI_SR,MEI_RP	74	.			NA07037,NA10851,NA11881,NA12761,NA12878,NA12891,NA12892,NA18571,NA18576,NA18638,NA19172
1	186453071	.	1	.	ALU	-	INS	P1_MEI_65&P2_MEI_343	303	RP|SR	lowcov+trio	val	PCR	CEU+YRI+CHB+JPT	0.12|0.04|0.06	45|38|42	11|3|5	.	.	.	15	19	20	MEI_SR,MEI_RP	80	.			NA07037,NA10851,NA11894,NA12045,NA12144,NA12234,NA12761,NA12878,NA12891,NA12892,NA18571,NA18576,NA18605,NA18638,NA18856,NA18858,NA19147
1	186704823	.	1	.	ALU	-	INS	P1_MEI_66&P2_MEI_1310	291	RP|SR	lowcov+trio	NA	.	CEU+YRI	0.34|0.21|.	48|42|0	33|18|0	.	.	.	14	41	66	MEI_SR,MEI_RP	80	.	AluY	TTTTTTTTTTTTTTTTGTAGACGGAGTCTCGCTCTGTCGCCCAGGCTGGAGTGCAGTGGCGCGATCTCGGCTCACTGCAAGCTCCGCCTCCCGGGTTCACGCCATTCTCCTGCCTCAGCCTCCCGAGTAGCTGGGACTACAGGCGCCCGCTACCACGCCCGGCTAATTTTTTGTATTTTTAGTAGAGACGGGGTTTCACCGTGTCAGCCAGGATGGTCTCGATCTCCTGACCTCGTGATCCGCCCGCCTCGGCCTCCCAAAGTGCTGGGATTACAGGCGTGAGCCACCGCGCCCCGGCC	NA06986,NA07037,NA07346,NA07357,NA10847,NA10851,NA11830,NA11831,NA11919,NA11920,NA11931,NA11994,NA11995,NA12043,NA12045,NA12249,NA12489,NA12716,NA12717,NA12749,NA12750,NA12761,NA12815,NA12828,NA12872,NA12873,NA12891,NA18489,NA18502,NA18507,NA18510,NA18520,NA18545,NA18550,NA18593,NA18871,NA18907,NA18947,NA18959,NA18960,NA18964,NA19093,NA19102,NA19137,NA19143,NA19190,NA19239,NA19240,NA19257
1	186815188	.	10	.	ALU	+	INS	P1_MEI_3361	.	SR	lowcov	NA	.	CEU	0.03|.|.	15|0|0	1|0|0	.	.	.	.	0	1	MEI_SR	4	.			NA11931
1	186882543	.	6	.	ALU	+	INS	P1_MEI_67	301	SR|RP	lowcov	NA	.	CEU+YRI	0.12|0.14|.	47|37|0	11|10|0	.	.	.	15	59	18	MEI_SR,MEI_RP	40	.			NA06986,NA07037,NA07051,NA11831,NA11993,NA12003,NA12006,NA12717,NA12750,NA12814,NA12828,NA18505,NA18507,NA18532,NA18547,NA18555,NA18558,NA18561,NA18564,NA18571,NA18572,NA18573,NA18592,NA18593,NA18608,NA18638,NA18858,NA18870,NA18916,NA18945,NA18948,NA18951,NA19099,NA19114,NA19141,NA19147,NA19257
1	186925972	.	17	.	ALU	-	INS	P2_MEI_1311	233	RP	trio	NA	.	.	.|.|.	0|0|0	0|0|0	.	.	.	6	8	13	MEI_RP	40	.			NA19239
1	187099462	.	10	.	ALU	-	INS	P1_MEI_3362	.	SR	lowcov	NA	.	.	.|.|.	0|0|0	0|0|0	.	.	Xing|GR2009|1104685258998	.	9	0	MEI_SR	16	.	AluYb8	TTTTTTTTTTTTTTTTTTTTTTTTTCGTTTAGACGGAGTCTCGCTCTGTCGGCCCAGGCCGGACTGCGGACTGCAGTGGCGCAATCTCGGCTCACTGCAAGCTCCGCTTCCCGGGTTCACGCCATTCTCCTGCCTTCTTAGTTTCCTCCCGAGTAGCTGGGACTACAGGCGCCCGCCACCGCGCCCGGCTAATTTTTTGTATTTTTAGTAGAGACGGGGTTTCACCTTGTTAGCCAGGATGGTCTCGATCTCCTGACCTCATGATCCACCCGCCTCGGCCTCCCAAAGTGCTGGGATTACAGGCGTG	NA11840,NA12874,NA11881,NA12814,NA12812,NA12814
1	187247426	.	42	.	ALU	+	INS	P1_MEI_1428	283	RP	lowcov	NA	.	YRI	0.00|0.06|0.00	41|40|41	0|5|0	.	.	.	.	8	2	MEI_RP	20	GENE|AL596326.1|ENSG00000226486			NA18870,NA18916,NA19138,NA19147
1	187261571	187261906	1	1	ALU	-	DEL	P1_M_061510_1_346&P2_M_061510_1_166	335	SR,RP	lowcov+trio	val	ASM	CEU+YRI+CHB+JPT	0.43|0.35|0.44	36|46|52	31|32|46	esv4046	.	.	16	.	.	pindel_D,washu,wtsi,broad,bc_deletion,WTSI_RP,YALEU_SR,BC_RP,WASHU_RP,UWASH_RP,PINDEL_SR	.	GENE|AL596326.1|ENSG00000226486	AluYb8	TTTTTTTTTTTTTTTTTTTTTTTTTTTTTTTTTGAGACGGAGTCTCGCTCTGTCGCCCAGGCCGGACTGCGGACTGCAGTGGCGCAATCTCGGCTCACTGCAAGCTCCGCTTCCCGGGTTCACGCCATTCTCCTGCCTCAGCCTCCCGAGTAGCTGGGACTACAGGCGCCCGCCACCGCGCCCGGCTAATTTTTTGTATTTTTAGTAGAGACGGGGTTTCACCTTGTTAGCCAGGATGGTCTCGATCTCTTGACCTCATGATCCACCCGCCTCGGCCTCCCAAAGTGCTGGGATTACAGGCGTGAGCCACCGCGCCCGGC	NA06994,NA07000,NA07037,NA07051,NA07346,NA07347,NA07357,NA10847,NA10851,NA11829,NA11830,NA11831,NA11881,NA11894,NA11918,NA11919,NA11920,NA11931,NA11992,NA11993,NA11994,NA11995,NA12003,NA12004,NA12006,NA12044,NA12144,NA12155,NA12249,NA12287,NA12716,NA12717,NA12749,NA12750,NA12751,NA12761,NA12763,NA12776,NA12813,NA12828,NA12878,NA12891,NA18486,NA18489,NA18498,NA18499,NA18501,NA18502,NA18504,NA18507…
1	187351584	187351855	1	1	L1	-	DEL	P1_M_061510_1_347&P2_M_061510_1_168	271	RP,SR	lowcov+trio	val	ASM	CEU+YRI+CHB+JPT	1.00|0.83|1.00	44|52|57	88|86|114	.	.	.	0	.	.	pindel_D,broad,bc_deletion,wtsi,BC_RP,WASHU_RP,PINDEL_SR,YALEU_SR,UWASH_RP	.	.	L1HS	TTTTTTTATTATTATTATTATACTTTAAGTTTTAGGGTACATGTGCACATTGTGCAGGTTAGTTACATATGTATACATGTGCCATGCTGGTGCGCTGCACCCACTAACGTGTCATCTAGCATTAGGTATATCTCCCAATGCTATCCCTCCCCCATCCCCCGACCCCACCACAGTCCCCAGAGTGTGATATTCCCCTTCCTGTGTCCGTGTGATCTCATTGTTCAATTCCCACCTATGAGTGAGAATATGCGGTGTTTGGTTTTTTATTCTTC	NA06986,NA06994,NA11829,NA11830,NA11993,NA12004,NA12761,NA12763,NA12776,NA12813,NA12828,NA18486,NA18489,NA18499,NA18501,NA18505,NA18507,NA18511,NA18517,NA18519,NA18520,NA18532,NA18562,NA18573,NA18856,NA18858,NA18861,NA18870,NA18907,NA18916,NA18967,NA18968,NA18971,NA18974,NA18975,NA18976,NA19005,NA19098,NA19116,NA19129,NA19131,NA19137,NA19138,NA19144,NA19152,NA19153,NA19159,NA19160,NA19171,NA19172…
1	187513648	.	1	.	ALU	+	INS	P1_MEI_68&P2_MEI_344	292	RP|SR	lowcov+trio	val	PCR	CEU+YRI+CHB+JPT	0.45|0.24|0.43	50|35|48	45|17|41	.	.	Xing|GR2009|1104685258851	13	119	85	MEI_SR,MEI_RP	80	.	AluYa8	GGCCGGGCGCGGTGGCTCACGCCTGTAATCTCAGCACTTTGGGAGGCCGAGGCGGGCGGATCACGAGGTCAGGAGATCGAGACCATCCCGGCTAAAATGGTGAAACCCCGTCTCTACTAAAACTACAAAAATAGCCGGGCGTAGTGGCGGGCGCCTGTAGTCCTAGCTACTTGGGAGGCTGAGGCAGGAGAATGGCGTGAACCCGGGAGGCGGAGCTTGCAGTGAGCCGAGATCGCGCCACTGCACTCCAGCCTGGGCGACAGAGCGAGACTCCGTCTAACAAAAAAAAAAAAAAAAAAAAAAAAAATAAA	NA06986,NA07037,NA07051,NA07347,NA07357,NA10847,NA10851,NA11830,NA11831,NA11840,NA11881,NA11918,NA11919,NA11920,NA11931,NA11992,NA11993,NA11995,NA12003,NA12045,NA12144,NA12234,NA12249,NA12287,NA12716,NA12717,NA12749,NA12750,NA12751,NA12761,NA12763,NA12776,NA12814,NA12815,NA12828,NA12874,NA12878,NA12891,NA18501,NA18502,NA18505,NA18517,NA18523,NA18532,NA18537,NA18542,NA18547,NA18552,NA18555,NA18558…
1	187559210	.	28	.	ALU	+	INS	P1_MEI_1429	245	RP	lowcov	NA	.	.	0.00|.|0.00	35|0|35	0|0|0	.	.	.	.	6	3	MEI_RP	18	.			NA18507,NA18519,NA18523,NA18856,NA19099,NA19225
1	188149957	.	7	.	ALU	+	INS	P1_MEI_69	230	SR|RP	lowcov	val	PCR	CEU	0.24|0.00|.	44|41|0	21|0|0	.	.	Iskow|CELL2010|FSTNXB304IK1Q8	16	48	26	MEI_SR,MEI_RP	40	.			NA06986,NA07347,NA10847,NA11829,NA11830,NA11831,NA11918,NA11919,NA11920,NA11931,NA11992,NA12044,NA12144,NA12489,NA12761,NA12763,NA12815,NA18542,NA18552,NA18563,NA18571,NA18576,NA18945,NA18948,NA18952,NA18960,NA18964,NA18965
1	189141068	.	1	.	ALU	-	INS	P1_MEI_70&P2_MEI_1312	215	RP|SR	lowcov+trio	NA	.	CEU+YRI+CHB+JPT	0.29|0.15|0.35	54|46|46	31|14|32	.	.	Iskow|CELL2010|FSTNXB304H1Y4O	17	73	97	MEI_SR,MEI_RP	80	.	AluYa5	TTCTTTTTTTTTTTTTTGAGACGGAGTCTCGCTCTGTCGCCCAGGCTGGAGTGCAGTGGCGCGATCTCGGCTCACTGCAAGCTCCGCCTCCCGGGTTCACGCCATTCTCCTGCCTCAGCCTCCCAAGTAGCTGGGACTACAGGCCGCCCGCCACTACGCCCGGCTAATTTTTTGTATTTTTAGTAGAGACGGGGTTTCACCGTTTTAGCCGGGATGGTCTCGATCTCCTGACCTCGTGATCCGCCCGCCTCGGCCTCCCAAAGTGCTGGGATTACAGGCGTGAGCCACCGCGCCCGGCC	NA06986,NA07037,NA07346,NA07357,NA10851,NA11830,NA11918,NA11919,NA11931,NA11993,NA11995,NA12004,NA12144,NA12156,NA12249,NA12489,NA12717,NA12749,NA12750,NA12761,NA12763,NA12776,NA12812,NA12828,NA12873,NA18498,NA18502,NA18516,NA18537,NA18545,NA18550,NA18562,NA18563,NA18566,NA18570,NA18571,NA18572,NA18576,NA18592,NA18605,NA18608,NA18609,NA18638,NA18858,NA18907,NA18909,NA18916,NA18940,NA18952,NA18956…
1	189744074	.	1	.	ALU	-	INS	P1_MEI_71&P2_MEI_345	298	RP|SR	lowcov+trio	NA	.	CEU+YRI+CHB+JPT	0.07|0.34|0.14	48|43|47	7|29|13	.	.	.	19	36	61	MEI_SR,MEI_RP	80	.	AluY	TTTTTTTTTTTTGTAGACGGAGTCTCGCTCTGTCGCCCAGGCTGGAGTGCAGTGGCGCGATCTCGGCTCACTGCAAGCTCCGCCTCCCGGGTTCACGCCTATTCTCCTGCCTCAGCCTTCCCGAGTAGCTGGGACTACAGGCGCCCGCCACTACGCCCGGCTAATTTTTTTTGTATTTTTTAGTAGAGACGGGGTTTCACCGTGTTAGCCAGGATGGTCTCGATCTCCTGACCTCGTGATCCGCCCGCCTCGGCCTCCCAAAGTGCTGGGATTACAGGCGTGAGCCACCGCGCCCGGCC	NA12043,NA12045,NA12154,NA12716,NA12717,NA12761,NA12874,NA18498,NA18499,NA18501,NA18504,NA18505,NA18507,NA18508,NA18510,NA18519,NA18520,NA18522,NA18526,NA18563,NA18566,NA18572,NA18577,NA18579,NA18603,NA18853,NA18858,NA18861,NA18871,NA18907,NA18951,NA18956,NA18959,NA19093,NA19108,NA19114,NA19143,NA19172,NA19190,NA19225,NA19238,NA19239,NA19240,NA19257
1	189835506	.	16	.	ALU	+	INS	P1_MEI_1430&P2_MEI_1313	292	RP	lowcov+trio	NA	.	YRI	0.00|0.05|0.00	43|42|44	0|4|0	.	.	.	15	7	2	MEI_RP	58	.			NA18522,NA19099,NA19102,NA19239
1	189847380	.	1	.	ALU	+	INS	P1_MEI_72&P2_MEI_1314	200	RP|SR	lowcov+trio	NA	.	CEU+YRI	0.35|0.14|.	47|35|0	33|10|0	.	.	Xing|GR2009|1104685258146	23	92	48	MEI_SR,MEI_RP	80	.	AluYa5	GGCCGGGCGCGGTGGCTCACGCCTGTAATCCCAGCACTTTGGGAGGGCCGAGGCGGGGCGGATCACGAGGTCAGGAGATCGAGACCATCCCGGCTAAAACGGTGAAACCCCGTCTCTACTAAAAATACAAAAAATTAGCTGGGCGTAGTGGCGGGCGCCTGTAGTCCCAGCTACTTGGGAGGCTGAGGCAGGAGAATGGCGTGAACCCGGGAGGCGGAGCTTGCAGTGAGCCGAGATCCCGCCACTGCACTCCAGCCTGGGCGACAGAGCGAGACTCCGTCTACAAAAAAAAAAAAAATAAAAAATAAAAA	NA07346,NA10847,NA10851,NA11829,NA11831,NA11918,NA11920,NA11931,NA11992,NA11993,NA11994,NA11995,NA12003,NA12006,NA12045,NA12154,NA12155,NA12156,NA12249,NA12287,NA12414,NA12716,NA12751,NA12761,NA12763,NA12872,NA12873,NA12878,NA12891,NA12892,NA18499,NA18517,NA18523,NA18550,NA18558,NA18564,NA18566,NA18570,NA18576,NA18577,NA18582,NA18593,NA18603,NA18608,NA18609,NA18871,NA18949,NA18959,NA18961,NA18964…
1	190084035	.	4	.	ALU	+	INS	P1_MEI_73&P2_MEI_346	306	RP|SR	lowcov+trio	val	PCR	CEU+YRI	0.19|0.04|.	50|39|0	19|3|0	.	.	.	27	52	50	MEI_SR,MEI_RP	80	.	AluYa5	GGCCGGGCGCGGTGGCTCACGCCTGTAATCCCAGCACTTTGGGAGGCCGAGGCGGGCGGATCACGAGGTCAGGAGATCGAGACCATCCCGGCTAAAACGGTGAAACCCCGTCTCTACTAAAAATACAAAAAATTAGCCGGGCGTAGTGGCGGGCGCCTGTAGTCCCAGCTACTTGGGAGGCTGAGGCAGGAGAATGGCGTGAACCCGGGAGGCGGAGCTTGCAGTGAGCCGAGATCCCGCCACTGCACTCCAGCCTGGGCGACAGAGCGAGACTCCGTCTACAAAAAAAAATAAAATAAAAATAAAA	NA07051,NA07347,NA11829,NA11918,NA11920,NA11994,NA11995,NA12003,NA12004,NA12287,NA12489,NA12716,NA12750,NA12761,NA12776,NA12878,NA12891,NA12892,NA18522,NA18526,NA18545,NA18547,NA18552,NA18555,NA18562,NA18563,NA18570,NA18571,NA18572,NA18573,NA18576,NA18579,NA18582,NA18605,NA18907,NA18940,NA18942,NA18945,NA18948,NA18952,NA18960,NA18964,NA19138,NA19143
1	190508873	.	15	.	ALU	-	INS	P2_MEI_1315	162	RP	trio	NA	.	.	.|.|.	0|0|0	0|0|0	.	.	.	17	19	16	MEI_RP	40	.			NA19239
1	190599292	.	10	.	L1	-	INS	P1_MEI_3363	.	SR	lowcov	NA	.	CEU	0.04|.|.	14|0|0	1|0|0	.	.	.	.	0	1	MEI_SR	4	GENE|RGS21|ENSG00000215825			NA12814
1	191816243	.	40	.	L1	+	INS	P1_MEI_1431	6017	RP	lowcov	NA	.	YRI	0.00|0.01|0.00	44|38|41	0|1|0	.	dbRIP_L1_00125	.	.	5	3	MEI_RP	16	.			NA18523
1	191941749	.	8	.	ALU	-	INS	P1_MEI_74&P2_MEI_1316	167	RP|SR	lowcov+trio	NA	.	CEU+YRI+CHB+JPT	0.02|0.07|0.02	53|42|45	2|6|2	.	.	.	16	6	12	MEI_SR,MEI_RP	54	GENE|AL160001.3|ENSG00000226640			NA12287,NA18508,NA18552,NA18909,NA18961,NA19099,NA19147,NA19238
1	192013970	.	10	.	L1	+	INS	P1_MEI_3364	5724	SR	lowcov	NA	.	CEU	0.03|.|.	17|0|0	1|0|0	.	.	.	.	2	0	MEI_SR	5	.			NA12874,NA12874
1	192044914	.	25	.	L1	-	INS	P1_MEI_1432&P2_MEI_1317	62	RP	lowcov+trio	NA	.	CEU+YRI+CHB+JPT	0.20|0.27|0.07	23|22|22	9|12|3	.	.	.	.	2	16	MEI_RP	6	.			NA10851,NA11894,NA12154,NA12287,NA12878,NA12891,NA12892,NA18502,NA18507,NA18508,NA18511,NA18523,NA18858,NA18943,NA18947,NA18951,NA19099,NA19225
1	192334468	.	10	.	ALU	-	INS	P1_MEI_75	45	SR|RP	lowcov	NA	.	.	0.00|0.00|.	29|13|0	0|0|0	.	.	.	.	6	4	MEI_SR,MEI_RP	30	.			NA18555,NA18563,NA18571,NA18608,NA18970,NA18973
1	192941748	.	4	.	ALU	+	INS	P1_MEI_76&P2_MEI_347	296	RP|SR	lowcov+trio	NA	.	CEU	0.20|.|.	52|0|0	21|0|0	.	.	.	14	61	35	MEI_SR,MEI_RP	80	.	AluYa5	GGCCGGGCGCGGTGGCTCACGCCTGTAATCCCAGCACTTTGGGAGGCCGAGGCGGGCGGATCACGAGGTCAGGAGATCGAGACCATCCCAGCTAAAAACGGTGAAACCCCGTCTCTACTAAAAATACAAAAAATTAGCCGGGCGTAGTGGCGGGCGCCTGTAGTCCCAGCTACTTAGGGAAAAGGAACTGAGGCAGGA	NA07051,NA07347,NA07357,NA11840,NA11894,NA11920,NA11992,NA12144,NA12234,NA12287,NA12414,NA12717,NA12749,NA12750,NA12751,NA12763,NA12776,NA12872,NA12878,NA12891,NA18519,NA18542,NA18547,NA18562,NA18563,NA18564,NA18570,NA18571,NA18572,NA18573,NA18576,NA18605,NA18943,NA18959,NA18964,NA18973,NA19102,NA19138,NA19143
1	193175570	.	51	.	ALU	-	INS	P1_MEI_1433	37	RP	lowcov	NA	.	.	0.00|.|0.00	41|0|45	0|0|0	.	.	.	.	3	3	MEI_RP	12	.			NA18858,NA18870,NA18907,NA19225
1	193201265	.	10	.	L1	?	INS	P2_MEI_1318	990	RP	trio	NA	.	.	.|.|.	0|0|0	0|0|0	.	.	Huang_Hu_RefTIPChip_Seq_Ver_3	7	54	68	MEI_RP	40	.			NA19238,NA19239,NA19240
1	193525601	.	23	.	L1	-	INS	P1_MEI_3365	.	SR	lowcov	inval	PCR	.	.|.|.	0|0|0	0|0|0	.	.	.	.	.	.	MEI_SR	3	.			NA07347
1	194061599	.	85	.	ALU	+	INS	P1_MEI_1434	257	RP	lowcov	NA	.	.	0.00|.|0.00	20|0|13	0|0|0	.	.	.	2	2	3	MEI_RP	10	.			NA19114,NA19147,NA19225
1	194424682	194424960	1	1	ALU	-	DEL	P1_M_061510_1_1121	277	RP	lowcov	val	ASM	CEU+YRI+CHB+JPT	0.29|0.28|0.42	19|18|18	11|10|15	.	.	.	.	.	.	wtsi	.	.	AluYf4	TTTTTTTTTTTTTTTTTTTTTTTGAGACAGAGTCTCGCTGTCGCCCAGGCTGGAGTGCAGTGGCGCAATCTCGGCTCACTGCAGGCTCCGCCCCCTGGGGTTCACGCCATTCTCCTGCCTCAGCCTCCCGAGTAGCTGGGACTACAGGCGCCCGCCACCTCGCCCGGCTAATTTTTTGTATTTTTAGTAGAGACGGGGTTTCACCGTGTTAGCCAGGATGGTCTCGATCTCCTGACCTCGTGATCCGCCCGCCTCGGCCTCCCAAATGGAATTTTCTTT	NA10847,NA11894,NA11919,NA12154,NA12249,NA12750,NA18520,NA18537,NA18558,NA18573,NA18582,NA18853,NA18856,NA18964
1	195047534	.	5	.	ALU	+	INS	P1_MEI_3366	130	SR	lowcov	NA	.	CEU	0.11|.|.	9|0|0	2|0|0	.	.	.	16	1	1	MEI_SR	15	.			NA18970,NA12874
1	196385401	.	24	.	L1	-	INS	P1_MEI_1435	3766	RP	lowcov	NA	.	.	.|.|.	0|0|0	0|0|0	.	.	.	.	.	.	MEI_RP	3	.			NA12003,NA18501,NA18520,NA18942
1	196479702	.	72	.	ALU	+	INS	P1_MEI_1436	171	RP	lowcov	NA	.	YRI	0.00|0.03|0.00	39|36|43	0|2|0	.	.	.	.	3	2	MEI_RP	10	GENE|NEK7|ENSG00000151414			NA18870,NA19116
1	196509916	.	1	.	ALU	-	INS	P1_MEI_77&P2_MEI_348	270	RP|SR	lowcov+trio	val	PCR	CEU+YRI+CHB+JPT	0.12|0.35|0.10	53|44|50	13|31|10	.	.	.	21	48	75	MEI_SR,MEI_RP	80	GENE|NEK7|ENSG00000151414	AluY	TTCTCTTTTTTTTTTTTTTTGAGACGGAGTCTCGCTCTGTCGCCCAGGCTGGAGTGCAGTGGCGCGATCTCGGCTCACTGCAAGCTCCGCCTCCCGGGTTCACGCCATTCTCCTGCCTCAGCCTCCCGAGTAGCTGGGACTACAGGCGCCCGCCACCACGCCCGGCTAATTTTTTGTATTTTTAGTAGAGACGGGGTTTCACCGTGTTAGCCAGGATGGTCTCGATCTCCTGACCTCGTGATCCGCCCGCCTCGGCCTCCCAAAGTG	NA07037,NA07051,NA07347,NA11830,NA11931,NA11995,NA12287,NA12750,NA12763,NA12874,NA12878,NA12892,NA18489,NA18498,NA18501,NA18502,NA18504,NA18507,NA18508,NA18510,NA18511,NA18517,NA18519,NA18520,NA18537,NA18558,NA18573,NA18576,NA18593,NA18638,NA18858,NA18861,NA18916,NA18965,NA18970,NA18980,NA19093,NA19108,NA19116,NA19129,NA19138,NA19147,NA19172,NA19210,NA19239
1	196735961	.	1	.	ALU	-	INS	P2_MEI_349	298	SR|RP	trio	val	PCR	.	.|.|.	0|0|0	0|0|0	.	.	Iskow|CELL2010|FSTNXB304JDUVK	15	19	26	MEI_SR,MEI_RP	40	.			NA12878,NA12891,NA12892
1	198360926	.	10	.	L1	+	INS	P1_MEI_3367	.	SR	lowcov	NA	.	CEU	0.03|.|.	16|0|0	1|0|0	.	.	.	.	1	0	MEI_SR	4	GENE|NR5A2|ENSG00000116833			NA12873
1	202505078	.	1	.	ALU	+	INS	P1_MEI_78&P2_MEI_351	298	RP|SR	lowcov+trio	val	PCR	CEU+YRI+CHB+JPT	0.45|0.34|0.43	54|44|49	49|30|42	.	.	.	17	161	127	MEI_SR,MEI_RP	80	GENE|PLEKHA6|ENSG00000143850	AluYg6	GGCCGGGCGCGGTGGCTCACGCCTGTAATCCCAGCACTTTGGGAGGCCGAGACGGGCGGATCACGAGGTCAGGAGATCGAGACCATCCTGGCTGACACGGTGAAAACCCCCGTCTCTACTAAAAAATACAAAAATTAGCCGGGGCATGGTGGCGCGCGCCTGTAGTCCCAGCTACTCGGGAGGCTGAGGCAGGAGAATGGCGTGAACCCGGGAGGCGGAGCTTGCAGTGAGTCGAGATCGCGCCACTGCGCTCCAGCCTGGGCGACAGAGCGAAACTCCGTCTACAAAAAAAAAAANAAAAAAAAAAAAAAAAAA	NA06986,NA07000,NA07037,NA07051,NA07346,NA07347,NA07357,NA10851,NA11829,NA11830,NA11831,NA11918,NA11931,NA11992,NA11994,NA11995,NA12003,NA12004,NA12006,NA12045,NA12144,NA12154,NA12156,NA12249,NA12287,NA12414,NA12489,NA12716,NA12717,NA12749,NA12750,NA12761,NA12763,NA12812,NA12814,NA12815,NA12828,NA12873,NA12874,NA12878,NA12891,NA12892,NA18501,NA18502,NA18505,NA18508,NA18517,NA18519,NA18520,NA18522…
1	202611663	.	4	.	ALU	-	INS	P1_MEI_79	301	SR|RP	lowcov	NA	.	CEU+YRI+CHB+JPT	0.17|0.21|0.14	50|39|48	17|16|13	.	.	.	20	54	73	MEI_SR,MEI_RP	40	GENE|AL606489.1|ENSG00000223673	AluY	TTCTTTTTTTTTTTTTTTTTTTTTTTGTAGACGGAGTCTCGCTCTGTCGCCCAGGCTGGAGTGCAGTGGCGCGATCTCGGCTCACTGCAAGCTCCGCCTCCCGGGTTCACGCCATTCTCCTGCCTCAGCCTCCCGAGTAGCTGGGACTACAGGCGCCCGCTACCACGCCCGGTCTAATTTTTTGTATTTTTAGTAGAGACGGGGTTTCACCGTGTTAGCCAGGATGGTCTCGATCTCCTGACCTCGTGATCCGCCCGCCTCGGCCTCCCAAAGTGCTGGGATTACAGGCGTGAGCCACCGCGCCCGGCC	NA10851,NA11831,NA11881,NA11894,NA11918,NA11919,NA11931,NA12004,NA12006,NA12043,NA12489,NA12751,NA12776,NA12828,NA18502,NA18523,NA18545,NA18558,NA18577,NA18593,NA18608,NA18858,NA18861,NA18870,NA18907,NA18916,NA18940,NA18945,NA18959,NA18961,NA18980,NA19093,NA19099,NA19114,NA19143,NA19147,NA19190,NA19225
1	202861192	.	23	.	ALU	+	INS	P1_MEI_3368	.	SR	lowcov	NA	.	.	.|.|.	0|0|0	0|0|0	.	.	.	.	.	.	MEI_SR	3	GENE|MDM4|ENSG00000198625			NA12872
1	203088904	.	34	.	L1	-	INS	P1_MEI_1437	6005	RP	lowcov	NA	.	YRI	0.00|0.04|0.00	43|41|50	0|3|0	.	.	.	.	3	4	MEI_RP	14	GENE|NFASC|ENSG00000163531			NA18856,NA18909
1	205186302	.	10	.	L1	+	INS	P1_MEI_3369	.	SR	lowcov	NA	.	CEU	0.03|.|.	15|0|0	1|0|0	.	.	.	.	1	0	MEI_SR	4	GENE|PIGR|ENSG00000162896			NA12814
1	205690653	.	8	.	ALU	+	INS	P1_MEI_1438&P2_MEI_1320	281	RP	lowcov+trio	NA	.	YRI	0.00|0.10|0.00	44|40|41	0|8|0	.	.	.	13	12	2	MEI_RP	68	.			NA18505,NA18861,NA18870,NA19102,NA19108,NA19114,NA19239,NA19240
1	206330593	.	23	.	L1	+	INS	P1_MEI_3370	.	SR	lowcov	NA	.	.	.|.|.	0|0|0	0|0|0	.	.	.	.	.	.	MEI_SR	3	GENE|PLXNA2|ENSG00000076356			NA12045
1	206583988	.	10	.	ALU	-	INS	P1_MEI_3371	.	SR	lowcov	NA	.	.	0.00|.|.	15|0|0	0|0|0	.	.	.	.	2	0	MEI_SR	5	.			NA19143,NA19143
1	206758103	.	3	.	ALU	-	INS	P1_MEI_80&P2_MEI_352	297	RP|SR	lowcov+trio	NA	.	CEU	0.06|.|.	44|0|0	5|0|0	.	.	Xing|GR2009|1104685478513	17	39	65	MEI_SR,MEI_RP	80	.	AluYa5	TTTTACTTTTTTTTTTTTTTTTGTAGACGGAGTCTCGCTCTGTTGCCCAGGCTGGAGTGCAGTGGCGCAATCTCGGCTCACTGCAAGCTCCGCCTCCCGGGTTCACGCCATTCTCCTGCCTCAGCCTCCCAAGTAGCTGGGACTACAGGCGCCCGCCACTACGCCCGGCTAATTTTTGTATTTTTTTAGTAGAGACGGGGTTTCACCGTTTTAGCTGGGATGGTCGCGATCTCCTGACCTCGTGATCCGCCCGCCTCGGCCTCCCAAAGTGCTGGGATTACAGGCGTGAGCCACCGCGCCCGGCC	NA07037,NA11992,NA12414,NA12873,NA12878,NA12891,NA18504,NA18505,NA18510,NA18519,NA18526,NA18532,NA18537,NA18542,NA18545,NA18558,NA18563,NA18564,NA18570,NA18571,NA18572,NA18573,NA18577,NA18592,NA18593,NA18603,NA18608,NA18858,NA18861,NA18907,NA18909,NA18916,NA18940,NA18942,NA18944,NA18945,NA18948,NA18949,NA18951,NA18952,NA18959,NA18964,NA18965,NA18980,NA19093,NA19099,NA19190,NA19225,NA19238,NA19239…
1	206829421	.	10	.	ALU	+	INS	P1_MEI_81	221	SR|RP	lowcov	NA	.	CEU	0.02|0.00|0.00	48|41|50	2|0|0	.	.	.	.	5	3	MEI_SR,MEI_RP	26	.			NA11918,NA11992
1	207605373	.	10	.	ALU	-	INS	P1_MEI_3372	259	SR	lowcov	NA	.	CEU	0.06|.|.	16|0|0	2|0|0	.	.	.	.	0	1	MEI_SR	4	.			NA12872
1	207659962	.	10	.	L1	+	INS	P1_MEI_3373	.	SR	lowcov	NA	.	CEU	0.04|.|.	14|0|0	1|0|0	.	.	.	.	0	1	MEI_SR	4	.			NA11931
1	208361926	208362245	1	1	ALU	-	DEL	P1_M_061510_1_376&P2_M_061510_1_192	319	RP,SR	lowcov+trio	val	ASM	CEU+YRI+CHB+JPT	0.47|0.21|0.17	44|46|56	41|19|19	esv4684	.	.	17	.	.	pindel_D,broad,bc_deletion,washu,wtsi,WASHU_RP,PINDEL_SR,WTSI_RP,BC_RP,UWASH_RP	.	GENE|SYT14|ENSG00000143469	AluYa5	TTTTTTTTTTTTTTTTTTTTTGAGACGGAGTCTCGCTCTGTCGCCCAGGCTGGAGTGCAGTGGTGGGATCTCGGCTCACTGCAAGCTCCGCCTCCCGGGTTCACGCCATTCTCCTGCCTCAGCCTCCCAAGTAGCTGGGACTACAGGCGCCCGCCACTACGCCCGGCTAATTTTTTTGTATTTTTAGTAGAGACGGGGTTTCACCGTTTTAGCCGGGATGGTCTCGATCTCCTGACCTCGTGATCCGCCCGCCTCGGCCTCCCAAAGTGCTGGGATTACAGGCGTGAGCCACCGCGCCCGGCC	NA06986,NA06994,NA07000,NA07037,NA07051,NA07347,NA07357,NA10847,NA10851,NA11830,NA11831,NA11881,NA11894,NA11918,NA11919,NA11931,NA11992,NA11993,NA12004,NA12005,NA12006,NA12043,NA12044,NA12045,NA12144,NA12154,NA12155,NA12156,NA12249,NA12287,NA12717,NA12749,NA12750,NA12751,NA12763,NA12776,NA12813,NA12828,NA12892,NA18486,NA18489,NA18498,NA18499,NA18501,NA18502,NA18504,NA18505,NA18507,NA18508,NA18510…
1	209028637	209028960	1	1	ALU	-	DEL	P1_M_061510_1_380	323	RP	lowcov	val	ASM	CEU+YRI+CHB+JPT	1.00|0.89|1.00	44|53|57	88|94|114	.	.	.	14	.	.	wtsi,broad,bc_deletion	.	GENE|KCNH1|ENSG00000143473	AluYa5	TTTTTTTTTTTTTTTTTTTTTTTTTTTTTGAGACGGAGTCTCGCTCTGTCGCCCAGGCTGGAGTGCAGTGGCGGGATCTCGGCTCACTGCAAGCTCCGCCTCCCGGGTTCACGCCATTCTCCTGCCTCAGCCTCCCAAGTAGCTGGGACTACAGGCGCCCGCCACTACGCCCGGCTAATTTTTTGTATTTTTAGTAGAGACGGGGTTTCACCGTTTTAGCCGGGATGGTCTCGATCTCCTGACCTCGTGATCCGCCCGCCTCGGCCTCCCAAAGTGCTGGGATTACAGGCGTGAGCCACCGCGCCCGGCC	NA06994,NA07347,NA10847,NA11830,NA11894,NA11992,NA12144,NA12287,NA12414,NA12717,NA12763,NA12813,NA12828,NA12892,NA18486,NA18489,NA18510,NA18511,NA18523,NA18562,NA18592,NA18853,NA18858,NA18861,NA18912,NA18945,NA18948,NA18949,NA18951,NA18953,NA18959,NA18967,NA18968,NA18971,NA18972,NA18974,NA18975,NA18976,NA18981,NA19093,NA19098,NA19108,NA19116,NA19119,NA19131,NA19137,NA19138,NA19144,NA19147,NA19152…
1	210032310	.	56	.	ALU	-	INS	P2_MEI_1321	36	RP	trio	inval	PCR	.	.|.|.	0|0|0	0|0|0	.	.	.	.	2	6	MEI_RP	16	EXON|AC096637.2|ENSG00000241395			NA12878,NA12891,NA12892,NA19240
1	210537758	210539239	1	1	SVA	-	DEL	P1_M_061510_1_381&P2_M_061510_1_38	1481	RP,SR	lowcov+trio	val	SAV,ASM	CEU+YRI+CHB+JPT	0.38|0.07|0.61	44|49|55	33|7|67	esv7385	.	.	18	.	.	pindel_D,bc_deletion,wtsi,broad,yale_solid,washu,AB_RP,WASHU_RP,WTSI_RP,UWASH_RP,YALEU_SR,PINDEL_SR,BC_RP	.	GENE|PPP2R5A|ENSG00000066027	SVA_E	TTTTTTTTTTTTTTCTTTTTTATTTTTATTGATCATTCTTGGGTGTTTCTCGCAGAGGGGGATTTGGCAGGGTCATAGGACAATAGTGGAGGGAAGGTCAGCAGATAAACAAGTGAACAAAGGTCTCTGGTTTTCCTAGGCAGAGGACCCTGCGGCCTTCCGCAGCGTTTGTGTCCCTGGGTACTTAAGATTAGGGAGTGGTGATGACTCTCAACGAGCATGCTGCCCTCAAGCATCTGTTCAACAAAGCACATCTTGCACCGCCCTTAATCCATCTAACCCTGAGTGGACACAGCACATGTCTCAGAGAGCACAGGGTTGGGGATAAGGTCCACAGATCAACAGGATCCCAAGGCAGAAGAATTTTTCTTAGTACAGAACAAAATGAAAAGTCTCCCA…	NA06985,NA06986,NA06994,NA07000,NA07051,NA07346,NA07347,NA07357,NA10847,NA10851,NA11829,NA11830,NA11832,NA11894,NA11918,NA11919,NA11920,NA11992,NA11993,NA11994,NA11995,NA12003,NA12004,NA12005,NA12006,NA12043,NA12045,NA12144,NA12154,NA12156,NA12249,NA12287,NA12414,NA12489,NA12716,NA12749,NA12750,NA12751,NA12760,NA12762,NA12763,NA12828,NA12878,NA12891,NA12892,NA18486,NA18489,NA18498,NA18499,NA18501…
1	210832457	.	10	.	ALU	-	INS	P1_MEI_3374	.	SR	lowcov	NA	.	CEU	0.03|.|.	15|0|0	1|0|0	.	.	.	.	3	0	MEI_SR	7	GENE|ATF3|ENSG00000162772			NA12873,NA12873,NA19143
1	210957659	.	19	.	ALU	+	INS	P1_MEI_1439	292	RP	lowcov	NA	.	.	0.00|.|0.00	36|0|42	0|0|0	.	.	.	10	12	2	MEI_RP	28	.			NA18858,NA19257
1	211203526	.	8	.	ALU	+	INS	P1_MEI_82	304	SR|RP	lowcov	NA	.	CEU+YRI	0.04|0.15|0.00	51|43|48	4|13|0	.	.	.	19	25	13	MEI_SR,MEI_RP	40	GENE|VASH2|ENSG00000143494			NA07051,NA07346,NA12043,NA18498,NA18517,NA18522,NA18523,NA18853,NA18909,NA18912,NA18916,NA19099,NA19129
1	212977622	.	4	.	ALU	+	INS	P1_MEI_83&P2_MEI_1322	227	RP|SR	lowcov+trio	NA	.	CEU+YRI	0.05|0.52|0.00	52|44|47	5|46|0	.	.	.	14	68	41	MEI_SR,MEI_RP	80	.	AluYg6	GGCCGGGTGCGGTGGCTCACGCCTGTAATCCCAGCACTTTGGGAGGCCGAGACGGGCGGATCACGAGGTCAGGAGATCGAGACCATCCTGGCTAACACGGTGAAACCCTGTCTCTACTAAAAATACAAAAAATTAGCCGGGCATGGTGGGCGCGCGCCCTGTAGTCCCAACTACACGGGAGGCTGAGGCAGGAGAATGGCGTGAACCCAGGAGGCGGAGGCTTGCAGTGAGTCGAGATCGCGCCACTGCACTCCAGCCTGGGCGACAGAGCGAAACTCCGTACTAAACAAAAAAAAAAAAAA	NA06986,NA11894,NA11995,NA12044,NA18498,NA18499,NA18502,NA18508,NA18511,NA18516,NA18519,NA18520,NA18522,NA18523,NA18856,NA18858,NA18861,NA18870,NA18907,NA18909,NA18912,NA19099,NA19108,NA19114,NA19116,NA19129,NA19137,NA19138,NA19141,NA19143,NA19147,NA19172,NA19190,NA19210,NA19238,NA19240,NA19257
1	213351899	.	6	.	ALU	-	INS	P1_MEI_84&P2_MEI_1323	272	RP|SR	lowcov+trio	NA	.	CEU+YRI	0.05|0.41|0.00	51|44|49	5|36|0	.	.	Iskow|CELL2010|FSTNXB304IVQPI	19	35	54	MEI_SR,MEI_RP	80	GENE|KCNK2|ENSG00000082482			NA06986,NA12717,NA12750,NA12763,NA12828,NA18489,NA18498,NA18502,NA18504,NA18508,NA18510,NA18511,NA18516,NA18517,NA18519,NA18522,NA18853,NA18858,NA18861,NA18871,NA18907,NA18916,NA19093,NA19102,NA19114,NA19116,NA19137,NA19138,NA19143,NA19172,NA19210,NA19225,NA19238,NA19257
1	213467549	.	10	.	ALU	-	INS	P1_MEI_3375	.	SR	lowcov	NA	.	CEU	0.08|.|.	13|0|0	2|0|0	.	.	.	.	1	0	MEI_SR	4	GENE|KCNK2|ENSG00000082482			NA12287
1	214251911	214252135	223	515	ALU	-	DEL	P1_M_061510_1_1169	224	RD	lowcov	val	SAV	.	.|.|.	0|0|0	0|0|0	.	.	.	.	.	.	yale_rd	.	GENE|USH2A|ENSG00000042781	AluYb9	CTGTTCCTCAGCCTGATCACGCTTGATTTTTTTTTTTTTTTTTTTTTTTTTTGAGACGGAGTCTCGCTCTGTCGCCCAGGCCGGACTGCGGACTGCAGTGGCGCAATCTCGGCTCACTGCAAGCTCCGCTTCCCGGGTTCACGCCATTCTCCTGCCTCAGCCTCCCCAGTAGCTGGGACTACAGGCGCCCACGCTTGATTTATTGATGGCAGTTCCACCAGGCCT	NA06994,NA11881,NA11993,NA11995,NA12004,NA12006,NA12043,NA12044,NA12144,NA12156,NA12717,NA12751,NA12761,NA12763,NA12813,NA18526,NA18532,NA18537,NA18542,NA18545,NA18547,NA18550,NA18555,NA18561,NA18563,NA18564,NA18570,NA18571,NA18572,NA18573,NA18576,NA18577,NA18592,NA18593,NA18605,NA18609,NA18940,NA18942,NA18943,NA18944,NA18945,NA18947,NA18948,NA18949,NA18951,NA18952,NA18956,NA18961,NA18964,NA18965…
1	214265347	.	7	.	ALU	-	INS	P1_MEI_1440&P2_MEI_353	300	RP|SR	lowcov+trio	NA	.	.	0.00|.|0.00	37|0|36	0|0|0	.	.	.	18	7	6	MEI_SR,MEI_RP	65	GENE|USH2A|ENSG00000042781			NA18498,NA18511,NA18909,NA19138,NA19147,NA19238,NA19239,NA19240
1	214505139	.	9	.	ALU	+	INS	P2_MEI_354	55	SR|RP	trio	NA	.	.	.|.|.	0|0|0	0|0|0	.	.	.	12	13	10	MEI_SR,MEI_RP	40	GENE|USH2A|ENSG00000042781			NA19238,NA19240
1	215091474	.	10	.	ALU	+	INS	P1_MEI_3376	.	SR	lowcov	NA	.	CEU	0.06|.|.	17|0|0	2|0|0	.	dbRIP_Alu_00991	.	.	0	1	MEI_SR	4	GENE|ESRRG|ENSG00000196482			NA12814
1	215615593	.	10	.	L1	-	INS	P1_MEI_3377	.	SR	lowcov	NA	.	.	.|.|.	0|0|0	0|0|0	.	.	Iskow|CELL2010|FSTNXB301B5JHI	.	0	3	MEI_SR	7	.			NA12234,NA11881
1	215820697	215821000	1	1	ALU	+	DEL	P1_M_061510_1_388&P2_M_061510_1_200	303	SR,RP	lowcov+trio	val	ASM	CEU+YRI+CHB+JPT	0.56|0.67|0.09	44|49|54	49|66|10	esv3768	.	.	16	.	.	broad,pindel_D,washu,wtsi,bc_deletion,WASHU_RP,BC_RP,WTSI_RP,YALEU_SR	.	GENE|GPATCH2|ENSG00000092978	AluYb9	CCTGTAATCCCAGCACTTTGGGAGGCCGAGGCGGGTGGATCATGAGGTCAGGAGATCGAGACCATCCTGGCTAACAAGGTGAAACCCCGTCTCTACTAAAAATACAAAAAATTAGCCGGGCGCGGTGGCGGGCGCCTGTAGTCCCAGCTACTGGGGAGGCTGAGGCAGGAGAATGGCGTTGAACCCGGGAAGCGGAGCTTGCAGTGAGCCGAGATTGCGCCACTGCAGTCCGCAGTCCAGCCTGGGCGACAGAGCGAGACTCCGTCTCAAAAAAAAAAAAAAAAAAAA	NA06986,NA06994,NA07000,NA07037,NA07346,NA07347,NA07357,NA10847,NA10851,NA11829,NA11831,NA11918,NA11919,NA11920,NA11992,NA11994,NA12003,NA12004,NA12006,NA12043,NA12044,NA12144,NA12154,NA12249,NA12287,NA12489,NA12716,NA12717,NA12749,NA12750,NA12751,NA12776,NA12813,NA12828,NA12878,NA12892,NA18489,NA18498,NA18499,NA18502,NA18505,NA18507,NA18508,NA18510,NA18511,NA18516,NA18517,NA18522,NA18523,NA18526…
1	215893586	.	11	.	ALU	+	INS	P1_MEI_1441&P2_MEI_1324	292	RP	lowcov+trio	NA	.	YRI	0.00|0.27|0.00	44|42|48	0|23|0	.	.	.	3	28	17	MEI_RP	80	GENE|SPATA17|ENSG00000162814			NA18489,NA18498,NA18504,NA18508,NA18511,NA18516,NA18517,NA18519,NA18522,NA18523,NA18907,NA19093,NA19108,NA19129,NA19137,NA19138,NA19190,NA19225,NA19238,NA19240,NA19257
1	215980123	.	7	.	ALU	-	INS	P1_MEI_85&P2_MEI_1325	155	RP|SR	lowcov+trio	NA	.	CEU+CHB+JPT	0.09|0.00|0.32	50|40|42	9|0|27	.	.	.	15	26	39	MEI_SR,MEI_RP	6	GENE|SPATA17|ENSG00000162814			NA06986,NA07357,NA11918,NA11919,NA11992,NA12003,NA12878,NA12891,NA18537,NA18542,NA18550,NA18552,NA18562,NA18563,NA18572,NA18577,NA18592,NA18593,NA18608,NA18638,NA18940,NA18944,NA18945,NA18948,NA18949,NA18961,NA18965,NA18970,NA18980
1	215984134	215984447	1	1	ALU	+	DEL	P1_M_061510_1_389&P2_M_061510_1_201	313	RP,SR	lowcov+trio	val	ASM	CEU+YRI+CHB+JPT	0.28|0.82|0.79	38|49|56	21|80|88	esv8865	.	.	11	.	.	broad,washu,pindel_D,wtsi,bc_deletion,PINDEL_SR,UWASH_RP,BC_RP,WTSI_RP,WASHU_RP	.	GENE|SPATA17|ENSG00000162814	AluYa5	CGGCCGGGCGCGGTGGCTCACGCCTGTAATCCCAGCACTTTGGGAGGCCGAGGCGGGCGGATCACGAGGTCAAGAGATCGAGACCATCCCGGCTAAAACGGTGAAACCCCGTCTCTACTAAAAATACAAAAAAATTAGCCGGGCGTAGTGGCGGGCGCCTGTAGTCCCAGCTACTTGGGAGGCTGAGGCAGGAGAATGGCGTGAACCCGGGAGGCGGAGCTTGCAGTGAGCCGAGATCCCGCCACTGCACTCCAGCCTGGGCGACAGAGCGAGACTCCGTCTCAAAAAAAAAAAAAAAAAAAA	NA06986,NA06994,NA07000,NA07037,NA07051,NA07346,NA07347,NA10847,NA10851,NA11829,NA11830,NA11831,NA11881,NA11894,NA11918,NA11920,NA11931,NA11992,NA11993,NA11994,NA12004,NA12006,NA12043,NA12044,NA12045,NA12144,NA12154,NA12155,NA12249,NA12287,NA12489,NA12716,NA12717,NA12749,NA12750,NA12751,NA12761,NA12763,NA12776,NA12828,NA12891,NA12892,NA18486,NA18489,NA18498,NA18499,NA18504,NA18508,NA18511,NA18516…
1	216068448	.	1	.	ALU	-	INS	P1_MEI_86&P2_MEI_1326	172	RP|SR	lowcov+trio	val	PCR	YRI	.|0.04|.	0|37|0	0|3|0	.	.	Xing|GR2009|1104685476127	21	28	29	MEI_SR,MEI_RP	50	GENE|SPATA17|ENSG00000162814	AluYa5	TTCTTTTTTTTTTTTTTTTNTTTTTTTTTGTAGACGGGAGTCTCGCTCTGTCGCCCAGGCTGGAGTGCAGTGGCGGGATCTCGGCTCACTGCAAGCTCCGCCTCCCGGGTTCACGCCATTCTCCTGCCTCAGCCTCCCAAGTAGCTGGGACTACAGGCGCCTGCCACTACGCCCGGCTAATTTTTTGTATTTTTAGTAGAGACGGGGTTTCACCGTTTTAGCCGGGATGGTCTCGATCTCCTGACCTCGGTGATCCGCCCGCCCTCGGCCTCCCAAAGTGCTGGGGATTACAGGCGTGAGCCACCGCGCCCGGCC	NA06986,NA07000,NA07037,NA07051,NA07346,NA10847,NA10851,NA11830,NA11894,NA11931,NA11992,NA12004,NA12006,NA12045,NA12144,NA12249,NA12287,NA12489,NA12750,NA12751,NA12763,NA12873,NA12891,NA18489,NA18504,NA18526,NA18552,NA18558,NA18566,NA18970
1	216249111	216255217	1	1	L1	-	DEL	P1_M_061510_1_682&P2_M_061510_1_513	6106	SR,RP	lowcov+trio	val	ASM	CEU+YRI	0.24|0.57|0.00	44|42|57	21|48|0	esv2847	.	.	14	.	.	washu,broad,wtsi,pindel_D,PINDEL_SR,WTSI_RP,WASHU_RP	.	.	L1HS	TTTTTTTTTTTAATAGAAAACATTCTTTTTTTTTTTTCAGTCATTATTTGTTTGTACAGCTGTGTGAATTTTTTTTTTTTATTATACTCTAAGTTTTAGGGTACATGTGCACATTGTGCAGGTTAGTTACATATGTATACATGTGCCATGCTGGTGCGCTGCACCCACTAATGTGTCATCTAGCATTAGGTATATCTCCCAATGCTATCCCTCCCCCCTCCCCCGACCCCACCACAGTCCCCAGAGTGTGATATTCCCCTTCCTGTGTCCATGTGATCTCATTGTTCAATTCCCACCTATGAGTGAGAATATGCGGTGTTTGGTTTTTTGTTCTTGCGATAGTTTACTGAGAATGATGGTTTCCAATTTCATCCATGTCCCTACAAAGGATATGAACTC…	NA06986,NA07000,NA07037,NA07051,NA07346,NA07347,NA07357,NA10847,NA10851,NA11829,NA11830,NA11831,NA11881,NA11894,NA11918,NA11919,NA11920,NA11931,NA11992,NA11993,NA11994,NA11995,NA12003,NA12004,NA12006,NA12043,NA12044,NA12045,NA12144,NA12154,NA12155,NA12156,NA12249,NA12287,NA12414,NA12489,NA12716,NA12717,NA12749,NA12750,NA12751,NA12761,NA12763,NA12813,NA12878,NA12891,NA18489,NA18498,NA18499,NA18502…
1	216312251	216313112	1	1	L1	+	DEL	P1_M_061510_1_391&P2_M_061510_1_203	861	SR,RP	lowcov+trio	val	ASM	CEU+YRI+CHB+JPT	0.44|0.96|0.92	43|51|57	38|98|105	esv9459	.	.	10	.	.	wtsi,pindel_D,broad,bc_deletion,washu,BC_RP,PINDEL_SR,WASHU_RP,YALEU_SR,WTSI_RP	.	.	L1HS	ACAAACAACCCCATCAAAAAGTGGGCGAAGGACATGAACAGACACTTCTCAAAAGAAGACATTTATGCAGCCAAAAAGACATGAAGAAATGCTCATCATCACTGGCCATCAGAGAAATGCAAATCAAAACCACTATGAGATATCATCTCACACCAGTTAGAATGGCAATCATTAAAAAGTCAGGAAACAACAGGTGCTGGAGAGGATGCGGAGAAATAGGAACACTTTTACACTGTTGGTGGGACTGTAAACTAGTTCAACCATTGTGGAAGTCAGTGTGGCGATTCCTCAGGGATCTAGAACTAGAAATACCATTTGACCCAGCCATCCCATTACTGGGTATATACCCAAATGAGTATAAATCATGCTGCTATAAAGACACATGCACACGTATGTTTA…	NA06986,NA06994,NA07000,NA07037,NA07051,NA07347,NA07357,NA10847,NA10851,NA11829,NA11830,NA11894,NA11918,NA11919,NA11920,NA11931,NA11992,NA11993,NA11995,NA12004,NA12006,NA12044,NA12045,NA12154,NA12155,NA12156,NA12249,NA12414,NA12489,NA12716,NA12717,NA12749,NA12750,NA12751,NA12761,NA12776,NA12828,NA12878,NA12891,NA12892,NA18486,NA18507,NA18510,NA18511,NA18552,NA18558,NA18562,NA18566,NA18603,NA18861…
1	216440131	.	58	.	ALU	-	INS	P1_MEI_1442	220	RP	lowcov	NA	.	YRI	0.00|0.03|0.00	41|39|46	0|2|0	.	.	.	.	2	2	MEI_RP	8	.			NA18511,NA19129
1	216517396	.	10	.	ALU	-	INS	P1_MEI_3378	.	SR	lowcov	NA	.	CEU	0.03|.|.	16|0|0	1|0|0	.	.	.	.	1	0	MEI_SR	4	.			NA12874
1	216822556	.	16	.	ALU	-	INS	P2_MEI_1327	291	RP	trio	val	PCR	.	.|.|.	0|0|0	0|0|0	.	.	.	3	10	14	MEI_RP	40	.			NA12878,NA12892
1	216852536	216852856	1	1	ALU	-	DEL	P1_M_061510_1_392&P2_M_061510_1_204	320	SR,RP,AS	lowcov+trio	val	ASM	CEU+YRI+CHB+JPT	0.12|0.30|0.05	40|33|47	10|20|5	esv4179	.	.	17	.	.	pindel_D,wtsi,washu,bc_deletion,OXFDU_AS,BC_RP,WTSI_RP,WASHU_RP,UWASH_RP,YALEU_SR,PINDEL_SR	.	.	AluYa5	TTTTTTTTTTTTTTTTTTTTTTTTGAGACGGAGTCTTGCTCTGTCGCCCAGGCTGGAGTGCAGTGGCGGGATCTCGGCTCACTGCAAGCTCCGCCTCCCGGGTTCACGCCATTCTCCTGCCTCAGCCTCCCAAGCAGCTGGGACTACAGGCACCCGCCACCACGCCCGGCTAATTTTTTGTATTTTTAGTAGAGACGGGGTTTCACCGTTTTAGCCGGGATGGTCTCGATCTCCTGACCTCGTGATCCGCCCGCCTCGGCCTCCCAAAGTGCTGGGATTACAGGCGTGAGCCACCGCGCCCGGC	NA06986,NA07000,NA07037,NA07051,NA07346,NA07347,NA07357,NA10847,NA10851,NA11829,NA11830,NA11831,NA11881,NA11894,NA11918,NA11919,NA11920,NA11931,NA11992,NA11993,NA11994,NA11995,NA12003,NA12004,NA12006,NA12043,NA12044,NA12045,NA12144,NA12154,NA12155,NA12156,NA12249,NA12287,NA12414,NA12489,NA12716,NA12717,NA12750,NA12761,NA12763,NA12776,NA12891,NA12892,NA18486,NA18489,NA18498,NA18501,NA18502,NA18505…
1	217240876	.	10	.	ALU	+	INS	P1_MEI_3379	.	SR	lowcov	NA	.	CEU	0.07|.|.	15|0|0	2|0|0	.	.	.	.	0	2	MEI_SR	5	.			NA11840,NA11840
1	217625487	.	62	.	ALU	+	INS	P1_MEI_1443	181	RP	lowcov	NA	.	CEU	0.09|0.00|0.00	39|37|43	7|0|0	.	.	.	.	3	7	MEI_RP	20	.			NA10847,NA11995,NA12003,NA12155,NA12716
1	217641300	.	5	.	ALU	-	INS	P1_MEI_3380&P2_MEI_1328	179	RP|SR	lowcov+trio	val	PCR	CEU	0.19|.|.	13|0|0	5|0|0	.	.	.	18	4	1	MEI_SR,MEI_RP	60	.	AluYa5	TTTTCTTTTTTTTNTTTTTTTTTTTGAGACGGAGTCTCGCTCTGTCGCCCAGGCTGGAGTGCAGTGGCGGGATCTCGGCTCACTGCAAGCTCCGCCTCCCGGGTTCACGCCATTCTCCTGCCTCAGCCTCCCAAGTAGCTGGGACTACAGGCGCCCGCCACTACGCCCGGCTAATATTTTGTATTTTTAGTAGAGACGGGGGTTTCACCGTTTTAGCCGGGATGGTCTCGATCTCCTGACCTCGTGATCCGCCCGCCTCGGCCTCCCAAAGTGC	NA11931,NA12872,NA12873,NA12891,NA19238
1	217989931	217990249	1	1	ALU	-	DEL	P1_M_061510_1_393&P2_M_061510_1_205	318	RP,SR	lowcov+trio	val	ASM	CEU+YRI+CHB+JPT	0.23|0.64|0.17	43|53|54	20|68|18	esv3789	.	.	15	.	.	pindel_D,washu,broad,bc_deletion,wtsi,WTSI_RP,PINDEL_SR,WASHU_RP,BC_RP	.	GENE|SLC30A10|ENSG00000196660	AluY	TTTTTTTTTTTTTTTTTTTTTTGAGACGGAGTCTCGCTCTGTCTCCCTGGCTGGAGCGCAGTGGCGCAATCTCGGCTCACTGCAAGCTCCGCTTCCCGGGTTCACGCCATTCTCCTGCCTCAGCCTCCCGAGTAGCTGGGACTACAGGCGCCCGCCACCGCGCCCGGCTAATTTTTTTGTATTTTTAGTAGAGACGGGGTTTCACCTTGTTAGCCAGGATGGTCTCGATCTCCTGACCTCATGATCCACCCGCCTCGGCCTCCCAAAGTGCTGGGATTACAGGCGTGAGCCACCGCGCCCGGCC	NA06986,NA07000,NA07037,NA07051,NA07357,NA10847,NA10851,NA11829,NA11830,NA11831,NA11894,NA11918,NA11919,NA11920,NA11931,NA11992,NA11993,NA11994,NA11995,NA12003,NA12004,NA12005,NA12006,NA12043,NA12044,NA12045,NA12144,NA12155,NA12249,NA12287,NA12414,NA12489,NA12716,NA12717,NA12749,NA12750,NA12751,NA12761,NA12763,NA12776,NA12828,NA12891,NA12892,NA18486,NA18499,NA18501,NA18502,NA18504,NA18507,NA18508…
1	218352077	218352397	1	1	ALU	-	DEL	P1_M_061510_1_394&P2_M_061510_1_208	320	SR,RP	lowcov+trio	val	ASM	CEU+YRI+CHB+JPT	0.74|0.55|0.66	40|46|54	59|51|71	.	.	.	17	.	.	bc_deletion,wtsi,washu,pindel_D,WTSI_RP,BC_RP,WASHU_RP,UWASH_RP,PINDEL_SR	.	GENE|IARS2|ENSG00000067704	AluYb8	TTTTTTTTTTTTTTTTTGAGACGGAGTCTCGCTCTGTCGCCCAGGTCGGACTGCGGACTGCAGTGGCGCAATCTCGGCTCACTGCAAGCTCCGCTTCCCGGGTTCACGCCATTCTCCTGCCTCAGCCTCCCGAGTAGCTGGGACTACAGGCGCCCGCCACCGCGCCCGGCTAATTTTTTGTATTTTTAGTAGAGACGGGGTTTCACCTTGTTAGCCAGGATGGTCTCGATCTCCTGACCTCATGATCCACCCGCCTCGGCCTCCCAAAGTGCTGGGATTACAGGCGTGAGCCACCGCGCCCGGC	NA06986,NA07346,NA10847,NA10851,NA11881,NA11920,NA11931,NA11992,NA12003,NA12004,NA12043,NA12750,NA12751,NA12761,NA12763,NA12892,NA18489,NA18501,NA18505,NA18508,NA18510,NA18511,NA18516,NA18520,NA18522,NA18523,NA18537,NA18542,NA18545,NA18547,NA18555,NA18558,NA18561,NA18563,NA18564,NA18566,NA18570,NA18571,NA18572,NA18576,NA18577,NA18592,NA18593,NA18605,NA18638,NA18861,NA18870,NA18871,NA18909,NA18940…
1	220035778	.	6	.	ALU	-	INS	P1_MEI_87&P2_MEI_1329	273	RP|SR	lowcov+trio	val	PCR	CEU+YRI+CHB+JPT	0.23|0.20|0.31	52|45|49	24|18|30	.	.	.	18	55	100	MEI_SR,MEI_RP	78	.			NA07037,NA07347,NA07357,NA10847,NA11829,NA11830,NA11881,NA11918,NA11919,NA11920,NA11993,NA11994,NA11995,NA12003,NA12144,NA12154,NA12249,NA12414,NA12716,NA12717,NA12814,NA12815,NA12828,NA12872,NA12878,NA12892,NA18486,NA18499,NA18501,NA18502,NA18508,NA18516,NA18523,NA18526,NA18537,NA18558,NA18561,NA18564,NA18566,NA18572,NA18573,NA18576,NA18579,NA18582,NA18592,NA18593,NA18603,NA18605,NA18608,NA18609…
1	220100766	220101098	1	1	ALU	+	DEL	P1_M_061510_1_398&P2_M_061510_1_210	332	AS,RP,SR	lowcov+trio	val	PCR,ASM	CEU+YRI+CHB+JPT	0.50|0.58|0.62	41|52|47	41|60|58	esv2858	.	.	15	.	.	bc_deletion,wtsi,pindel_D,broad,washu,PINDEL_SR,YALEU_SR,WTSI_RP,WASHU_RP,OXFDU_AS,UWASH_RP,BC_RP	.	.	AluYa5	CGGCCGGGCGCGGTGGCTCACGCCTGTAATCCCAGCACTCTGGGAGGCCGAGGCGGGCGGATCACGAGGTCAGGAGATCGAGACCATCCCGGCTAAAACGGTGAAACCCCGTCTCTACTAAAAATACAAAAAATTAGCCGGGCGTAGTGGCGGGCGCCTGTAGTCCCAGCTGCTTGGGAGGCTGAGGCAGGAGAATGGCGTGAACCCGGGAGGCGGAGCTTGCAGTGAGCCGAGATCCCGCCACTGCACTCCAGCCTGGGCGACAGAGCGAGACTCCGTCTCAAAAAAAAAAAAAAAAAAAAAAAAAAAAAAAAAAAA	NA06986,NA06994,NA07000,NA07037,NA07051,NA07346,NA07357,NA10847,NA10851,NA11829,NA11881,NA11894,NA11918,NA11919,NA11920,NA11931,NA11992,NA11993,NA11994,NA11995,NA12003,NA12004,NA12006,NA12044,NA12144,NA12154,NA12155,NA12156,NA12414,NA12716,NA12717,NA12749,NA12751,NA12761,NA12763,NA12776,NA12813,NA12828,NA12878,NA12891,NA12892,NA18486,NA18498,NA18499,NA18501,NA18502,NA18504,NA18507,NA18510,NA18511…
1	220362766	.	15	.	ALU	-	INS	P2_MEI_1330	207	RP	trio	NA	.	.	.|.|.	0|0|0	0|0|0	.	.	.	7	17	23	MEI_RP	40	GENE|AC092765.3|ENSG00000236230			NA19239
1	220645730	.	10	.	L1	-	INS	P2_MEI_2222	.	SR	trio	NA	.	.	.|.|.	0|0|0	0|0|0	.	.	Iskow|CELL2010|FSTNXB301BR31H	.	5	0	MEI_SR	10	.			NA19240
1	220919235	.	10	.	ALU	+	INS	P1_MEI_3381	.	SR	lowcov	NA	.	CEU	0.03|.|.	18|0|0	1|0|0	.	.	.	.	0	1	MEI_SR	4	GENE|AL592148.5|ENSG00000244697			NA12815
1	220937306	.	1	.	ALU	+	INS	P1_MEI_3382&P2_MEI_2223	294	SR	lowcov+trio	val	PCR	CEU	0.46|.|.	14|0|0	13|0|0	.	.	Xing|GR2009|1104685475059	13	6	10	MEI_SR	53	GENE|AIDA|ENSG00000186063	AluYb8	GGCCGGGCGCGGTGGCTCACGCCTGTAATCCCAGCACTTTGGGAGGCCGAGGCGGGTGGATCATGAGGTCAGGAGATCGAGACCATCCTGGCTAACAAGGTGAAACCCCGTCTCTACTAAAAATACAAAAAATTAGCCGGGCGCGGTGGCGGGCGCCTGTAGTCCCAGCTACTCGGGAGGCTGAGGCAGGAGAATGGCGTGAACCCGGGAAGCGGAGCTTGCAGTGAGCCGAGATTGCGCCACTGCAGTCCGCAGTCCGACCTGGGCGACAGAGCGAGACTCCGTCTAACAAAAAAAAAAAAAAAAAAAAAAAAAAAAAA	NA07347,NA11931,NA12045,NA12249,NA12814,NA12872,NA12873,NA12874,NA12878
1	221127443	221127762	1	1	ALU	-	DEL	P1_M_061510_1_400&P2_M_061510_1_211	319	RP	lowcov+trio	val	ASM	CEU+YRI+CHB+JPT	0.80|0.91|0.94	43|44|57	69|80|107	esv5267	.	.	13	.	.	wtsi,bc_deletion,pindel_D,washu,broad,WASHU_RP,BC_RP	.	GENE|DISP1|ENSG00000154309	AluYb8	TTTTTTTTTTTTTTTTTTTGAGACGGAGTCTCGCTCTGTTGCCCAGGCCGGACTGCGGACTGCAGTGGCGCAATCTCGGCTCACTGCAAGCTCCGCTTCCTGGGTTCACGCCATTCTCCTGCCTCAGCCTCCCGAGTAGCTGGGACTACAGGCGCCCGCCACCGCGCCCGGCTAATTTTTTGTATTTTTAGTAGAGACGGGGTTTCACCTTGTTAGCCAGGATGGTCTCGATCTCCTGACCTCATGATCCACCCGCCTCGGCCTCCCAAAGTGCTGGGATTACAGGCGTGAGCCACCGCGCCCGGCC	NA06986,NA06994,NA07037,NA07051,NA07346,NA07347,NA07357,NA10851,NA11831,NA11881,NA11919,NA11931,NA12003,NA12004,NA12045,NA12155,NA12249,NA12287,NA12414,NA12489,NA12717,NA12751,NA12761,NA12813,NA12891,NA12892,NA18489,NA18504,NA18505,NA18520,NA18526,NA18532,NA18558,NA18572,NA18577,NA18853,NA18858,NA18871,NA18909,NA18912,NA18944,NA18945,NA18947,NA18949,NA18952,NA18956,NA18965,NA18967,NA18968,NA18971…
1	221978180	.	1	.	ALU	+	INS	P1_MEI_88&P2_MEI_1331	290	RP|SR	lowcov+trio	NA	.	CEU+YRI+CHB+JPT	0.11|0.41|0.18	50|43|50	11|35|18	.	.	.	13	66	42	MEI_SR,MEI_RP	80	GENE|CAPN2|ENSG00000162909			NA11881,NA11920,NA11993,NA12045,NA12144,NA12287,NA12749,NA12763,NA12776,NA12872,NA18498,NA18501,NA18504,NA18507,NA18510,NA18511,NA18516,NA18519,NA18520,NA18523,NA18542,NA18547,NA18552,NA18566,NA18571,NA18573,NA18579,NA18603,NA18638,NA18853,NA18856,NA18858,NA18861,NA18871,NA18907,NA18940,NA18948,NA18956,NA18960,NA18961,NA18964,NA18969,NA19099,NA19108,NA19114,NA19116,NA19190,NA19225,NA19238,NA19239…
1	222308069	.	6	.	ALU	+	INS	P1_MEI_89&P2_MEI_1332	69	RP|SR	lowcov+trio	NA	.	CEU+YRI+CHB+JPT	0.17|0.29|0.30	51|42|48	17|24|29	.	.	.	14	62	36	MEI_SR,MEI_RP	80	.			NA07000,NA07037,NA07357,NA11881,NA11920,NA11931,NA11992,NA11993,NA12144,NA12414,NA12489,NA12716,NA12717,NA12763,NA18502,NA18505,NA18511,NA18516,NA18517,NA18519,NA18522,NA18532,NA18537,NA18542,NA18558,NA18562,NA18564,NA18570,NA18571,NA18576,NA18592,NA18593,NA18609,NA18638,NA18858,NA18861,NA18871,NA18907,NA18916,NA18942,NA18944,NA18945,NA18947,NA18965,NA18973,NA18980,NA19005,NA19093,NA19099,NA19102…
1	222459444	222459757	1	1	ALU	-	DEL	P1_M_061510_1_1014&P2_M_061510_1_214	313	RP,SR	lowcov+trio	val	PCR,ASM	CEU+YRI+CHB+JPT	0.01|0.04|0.01	42|47|57	1|4|1	esv3940	.	.	13	.	.	yale_sr,wtsi,washu,pindel_D,WASHU_RP,WTSI_RP,BC_RP,PINDEL_SR,UWASH_RP,YALEU_SR	.	.	AluY	TTTTTTTTTTTTTTTTTTTTGAGACGGAGTCTCGCTCCGTCACCCAGGCTGGAGTGCAGTGGCGGGATCTCGGCTCACTGCAAGCTCCGCCTCCCGGGTTCACGCCATTCTCCTGCCTCAGCCTCCCGAGTAGCTGGGACTACAGGCGCCCGCCACCACGCCCGGCTAATTTTTTGTATTTTTAGTAGAGACGGGGTTTCACCGTGTTAGCCGGGATGGTCTCGATCTCCTGACCTCGTGATCCGCCCGCCTCGGCCTCCCAAAGTGCTGGGATTACAGGCGTGAGCCACCGCGCCCGGCC	NA06986,NA07000,NA07037,NA07051,NA07347,NA07357,NA10847,NA10851,NA11831,NA11881,NA11894,NA11918,NA11931,NA11992,NA11993,NA11994,NA11995,NA12003,NA12004,NA12005,NA12006,NA12043,NA12044,NA12144,NA12154,NA12156,NA12249,NA12414,NA12489,NA12716,NA12717,NA12749,NA12750,NA12751,NA12761,NA12763,NA12776,NA12828,NA12878,NA12891,NA12892,NA18489,NA18498,NA18499,NA18501,NA18502,NA18504,NA18505,NA18507,NA18508…
1	222843217	.	6	.	ALU	-	INS	P1_MEI_90&P2_MEI_1333	290	RP|SR	lowcov+trio	NA	.	CEU+YRI+CHB+JPT	0.02|0.29|0.21	51|43|48	2|25|20	.	.	.	15	33	59	MEI_SR,MEI_RP	80	GENE|CNIH3|ENSG00000143786			NA07000,NA11918,NA18498,NA18499,NA18501,NA18502,NA18517,NA18519,NA18523,NA18537,NA18563,NA18566,NA18579,NA18582,NA18593,NA18605,NA18870,NA18907,NA18909,NA18912,NA18916,NA18940,NA18942,NA18945,NA18949,NA18951,NA18959,NA18965,NA18973,NA18980,NA19102,NA19108,NA19114,NA19116,NA19138,NA19147,NA19190,NA19239,NA19257
1	223323168	223323465	1	1	ALU	+	DEL	P1_M_061510_1_405	270	SR,RP	lowcov	val	ASM	CEU+YRI+CHB+JPT	0.03|0.46|0.20	44|46|55	3|42|22	esv4999	.	.	.	.	.	wtsi,pindel_D,broad,bc_deletion,washu	.	GENE|DNAH14|ENSG00000185842	AluYa5	GAGGCCGAGGCGGGCGGATCACGAGGTCAGGAGATCGAGACCATCCCGGCTAAAACGGTGAAACCCTGTCTCTACTAAAAATACAAAAAATTAGCCGGGTGTAGTGGCGGGCGCCTGTAGTCCCAGCTACTTGGGAAGCTGAGGCAGGAGAATGGCGTGAACCCGGGAGGCGGAGCTTGCAGTGAGCCGAGATCCCGCCACTGCACTCCAGCCTGGGCGACAGAGCGAGACTCCGTCTCAAAAAAAAAAAAAAAAAAAAGAAGCTTTTGGGCCAAGACAGTGGAGTTTTCTAAATATC	NA06986,NA06994,NA07000,NA07037,NA07051,NA07346,NA07347,NA07357,NA10847,NA10851,NA11829,NA11830,NA11831,NA11881,NA11894,NA11918,NA11919,NA11920,NA11931,NA11992,NA11993,NA11994,NA11995,NA12003,NA12004,NA12005,NA12006,NA12043,NA12044,NA12045,NA12144,NA12154,NA12155,NA12249,NA12287,NA12414,NA12489,NA12716,NA12717,NA12749,NA12750,NA12751,NA12761,NA12763,NA12776,NA12813,NA12828,NA12878,NA12891,NA12892…
1	223411024	223411338	1	1	ALU	-	DEL	P1_M_061510_1_406&P2_M_061510_1_217	314	SR,RP	lowcov+trio	val	ASM	CEU+YRI+CHB+JPT	0.88|0.77|0.64	44|53|56	77|82|72	.	.	.	12	.	.	wtsi,washu,pindel_D,bc_deletion,broad,PINDEL_SR,WASHU_RP,WTSI_RP,OXFDU_AS,BC_RP,YALEU_SR	.	GENE|DNAH14|ENSG00000185842	AluYa5	TTTTTTTTTTTTTTTTTTTTTTGAGACGGAGTCTCGCTCTGTCGCCCAGGCTGGAGTGCAGTGGCGGGATCTCGGCTCACTGCAAGCTCCGCCTCCCGGGTTCACGCCATTCTCCTGCCTCAGCCTCCCAAGTAGCTGGGACTACAGGCGCCCGCCACTACGCCCGGCTAATTTTTTTGTATTTTTAGTAGAGACGGGGTTTCACCGTTTTAGCCGGGATGGTCTCGATCTCTTGACCTCGTGATCCGCCCGCCTCGGCCTCCCGAAGTGCTGGGATTACAGGCGTGAGCCACCGCGCCCGGC	NA06994,NA07037,NA07357,NA11881,NA11918,NA11920,NA11993,NA12004,NA12043,NA12044,NA12144,NA12154,NA12156,NA12249,NA12287,NA12414,NA12878,NA12891,NA18486,NA18502,NA18504,NA18505,NA18507,NA18510,NA18516,NA18519,NA18522,NA18526,NA18537,NA18542,NA18545,NA18547,NA18550,NA18561,NA18562,NA18563,NA18564,NA18566,NA18570,NA18571,NA18576,NA18577,NA18579,NA18582,NA18603,NA18605,NA18609,NA18638,NA18856,NA18909…
1	223460209	.	27	.	L1	-	INS	P1_MEI_1444	5982	RP	lowcov	NA	.	CEU	0.04|0.00|0.00	40|34|47	3|0|0	.	.	.	.	2	6	MEI_RP	16	GENE|DNAH14|ENSG00000185842			NA12004,NA12043
1	223627244	.	23	.	ALU	+	INS	P1_MEI_3383	.	SR	lowcov	NA	.	.	.|.|.	0|0|0	0|0|0	.	.	.	.	.	.	MEI_SR	3	GENE|DNAH14|ENSG00000185842			NA07346
1	223828939	223829263	2	2	ALU	+	DEL	P1_M_061510_1_408&P2_M_061510_1_218	324	SR,RP	lowcov+trio	val	PCR	CEU+YRI	0.38|0.52|.	20|21|0	15|22|0	esv4193	.	.	.	.	.	washu,wtsi,pindel_D,bc_deletion,WTSI_RP,BC_RP,PINDEL_SR	.	GENE|ENAH|ENSG00000154380	AluY	AAAAAAGGCCGGGCGCGGTGGCTCACGCCTGTAATCCCAGCACTTTGGGAGGCCGAGGCGGGCGGATCACGAGGTCAGGAGATCGAGACCATCCTGGGTAACACAGTGAAACCCCGTCTCTACTAAAAATACAAAAAATTAGCCGGGCGTGGTAGCGGGCGCCTGTAGTCCCAGCTACTCGGGAGGCTGAGGCAGGAGAATGGCGTGAACCCGGGAGGCGGAGCTTGCAGTGAGCCGAGATCGCGCCACTGCACTCCAGCCTGGGCGACAGAGCGAGACTCCGTCTCAAAAAAAAAAAAAAAAAAAATATATATATATAAAAAAA	NA07000,NA07037,NA07051,NA07346,NA07357,NA10847,NA10851,NA11829,NA11830,NA11831,NA11881,NA11894,NA11919,NA11992,NA11994,NA11995,NA12003,NA12005,NA12006,NA12043,NA12044,NA12144,NA12154,NA12155,NA12249,NA12287,NA12489,NA12716,NA12717,NA12751,NA12761,NA12763,NA12828,NA12891,NA12892,NA18501,NA18502,NA18505,NA18508,NA18510,NA18511,NA18519,NA18520,NA18522,NA18523,NA18526,NA18532,NA18537,NA18545,NA18547…
1	224063043	.	1	.	ALU	+	INS	P1_MEI_91&P2_MEI_355	291	RP|SR	lowcov+trio	val	PCR	CEU+YRI+CHB+JPT	0.25|0.03|0.37	51|44|49	26|3|36	.	.	.	12	80	88	MEI_SR,MEI_RP	80	.	AluYa5	GGCCGGGCGCGGTGGCTCACGCCTGTAACTCCCAGCACTTTGGGAGGCCGAGGCGGGCGGATCACGAGGTCAGGAGATCGAGGCCATCCCGGCTAAAACCGGTGAAACCCCGTCTCTACTAAAAATACAAAAAATTAGCCGGGCGTAGTGGCGGGCGCCTGTAGTCCCAGCTACTTGGGAGGACTGAGGCAGGAGAATGGCGTGAACCCGGGAGGCGGAGCTTGCAGTGAGCCGAGATCCCTCCACTGCACTCCAGCCTGGGCGACAGAGCGAGACTCCGTCTACAAAAAAAAAAAAAAAAAAGAA	NA06986,NA07037,NA07051,NA07346,NA07347,NA07357,NA10847,NA10851,NA11831,NA11840,NA11881,NA11993,NA12043,NA12045,NA12144,NA12155,NA12234,NA12249,NA12287,NA12414,NA12716,NA12750,NA12812,NA12814,NA12828,NA12873,NA12874,NA12878,NA12891,NA18519,NA18545,NA18550,NA18555,NA18561,NA18562,NA18563,NA18564,NA18566,NA18570,NA18571,NA18572,NA18579,NA18582,NA18593,NA18603,NA18605,NA18638,NA18940,NA18945,NA18949…
1	225065538	.	10	.	ALU	-	INS	P1_MEI_3384	.	SR	lowcov	NA	.	.	0.00|.|.	13|0|0	0|0|0	.	.	.	.	1	0	MEI_SR	4	.			NA18970
1	225157363	.	18	.	ALU	-	INS	P1_MEI_1445&P2_MEI_1334	278	RP	lowcov+trio	NA	.	YRI	0.00|0.12|0.00	39|34|44	0|8|0	.	.	.	4	3	10	MEI_RP	7	GENE|CABC1|ENSG00000163050			NA18520,NA18523,NA18871,NA18907,NA19099,NA19114,NA19239
1	225529554	.	5	.	ALU	+	INS	P1_MEI_92&P2_MEI_1335	182	RP|SR	lowcov+trio	NA	.	CEU+YRI+CHB+JPT	0.13|0.41|0.39	53|43|48	14|35|37	.	.	.	28	90	69	MEI_SR,MEI_RP	80	GENE|CDC42BPA|ENSG00000143776	AluY	GGCCGGGCGCGGTGGCTCACGCCTGTAATCCCAGCACTTTGGGAGGCCGAGGTGGGCGGATCACGAGGTCAGGAGATCGAGACCATCCTGGCTAACACGGTGAAACCCCATCTCTACTAAAAATACAAAAAAAAATTAAGCCGGGCGTGGTAGCGGGCGCCTGTAGTCCCAGCTACTTGGGAG	NA07347,NA07357,NA10847,NA11992,NA11993,NA11995,NA12003,NA12154,NA12234,NA12287,NA12716,NA12776,NA12815,NA12872,NA18502,NA18507,NA18511,NA18516,NA18517,NA18519,NA18522,NA18523,NA18526,NA18537,NA18542,NA18545,NA18555,NA18558,NA18564,NA18566,NA18570,NA18572,NA18573,NA18576,NA18577,NA18579,NA18592,NA18593,NA18603,NA18608,NA18638,NA18856,NA18861,NA18870,NA18907,NA18909,NA18912,NA18940,NA18943,NA18947…
1	225569071	.	38	.	ALU	+	INS	P1_MEI_1446&P2_MEI_1336	140	RP	lowcov+trio	NA	.	CEU	0.06|.|0.00	44|0|41	5|0|0	.	.	.	.	30	14	MEI_RP	8	GENE|CDC42BPA|ENSG00000143776			NA10847,NA12003,NA12154,NA12155,NA12716,NA18511,NA18516,NA18519,NA18523,NA18870,NA18912,NA19093,NA19108,NA19138,NA19147,NA19172,NA19190,NA19238,NA19239,NA19240,NA19257
1	226090716	226091028	1	1	ALU	+	DEL	P1_M_061510_1_413&P2_M_061510_1_226	312	SR,RP	lowcov+trio	val	ASM	CEU+YRI+CHB+JPT	0.08|0.22|0.39	38|45|50	6|20|39	esv7960	.	.	13	.	.	washu,pindel_D,broad,wtsi,bc_deletion,UWASH_RP,PINDEL_SR,WASHU_RP,BC_RP	.	GENE|MPN2|ENSG00000185888	AluYa5	CGGCCGGGCGCGGTGGCTCACGCCTGTAATCCCAGCACTTTGGGAGGCCGAGGCGGGCGGATCACGAGGTCAGGAGATCGAGACCATCCCGGCTAAAACGGTGAAACCCCGTCTCTACTAAAAATACAAAAAATTAGCCGGGCGTAGTGGCGGGCGCCTGTAGTCCCAGCTACTTGGGAGGCTGAGGCAGGAGAATGGCGTGAACCCGGGAGGCGGAGCTTGCAGTGAGCCGAGATCCCGCCACTGCACTCCAGCCTGGGCGACAGAGCGAGACTCCGTCTCAAAAAAAAAAAAAAATAA	NA06986,NA06994,NA07000,NA07037,NA07051,NA07346,NA07347,NA07357,NA10847,NA10851,NA11829,NA11830,NA11831,NA11881,NA11894,NA11918,NA11919,NA11920,NA11931,NA11992,NA11993,NA11994,NA11995,NA12003,NA12004,NA12006,NA12043,NA12044,NA12045,NA12144,NA12154,NA12155,NA12156,NA12249,NA12287,NA12414,NA12489,NA12716,NA12717,NA12749,NA12750,NA12751,NA12761,NA12763,NA12776,NA12813,NA12828,NA12878,NA12892,NA18486…
1	226638783	226639112	1	1	ALU	-	DEL	P1_M_061510_1_414&P2_M_061510_1_228	329	SR,RP	lowcov+trio	val	ASM	CEU+YRI	0.49|0.26|.	40|33|0	39|17|0	esv6596	.	.	15	.	.	wtsi,washu,bc_deletion,broad,pindel_D,WASHU_RP,YALEU_SR,PINDEL_SR,BC_RP,WTSI_RP,UWASH_RP	.	.	AluYa5	TTTTTTTTTTTTTTTTTTTTTTTTTTTTTTTTTTTGAGACGGAGTCTCGCTCTGTCGCCCAGGCTGGAGTGCAGTGGCGGGATCTCGGCTCACTGCAAGCTCCGCCTCCCGGGTTCACGCCATTCTCCTGCCTCAGCCTCCCAAGTAGCTGGGACTACAGGCGCCCGCCACTACGCCCGGCTAATTTTTTGTATTTTTAGTAGAGACGGGGTTTCACCGTTTTAGCTGGGATGGTCTCGATCTCCTGACCTCGTGATCCGCCCGCCTCGGCCTCCCAAAGTGCTGGGATTACAGGCGTGAGCCACCGCGCCCGGC	NA06986,NA06994,NA07037,NA07051,NA07346,NA07347,NA07357,NA10847,NA10851,NA11829,NA11830,NA11831,NA11881,NA11919,NA11920,NA11931,NA11993,NA12003,NA12006,NA12043,NA12045,NA12144,NA12155,NA12249,NA12287,NA12489,NA12716,NA12749,NA12751,NA12761,NA12763,NA12776,NA12813,NA12828,NA12878,NA12891,NA12892,NA18486,NA18489,NA18498,NA18499,NA18501,NA18502,NA18504,NA18505,NA18507,NA18508,NA18510,NA18511,NA18516…
1	226881428	226881764	1	1	ALU	-	DEL	P1_M_061510_1_1020&P2_M_061510_1_682	336	RP	lowcov+trio	val	ASM	.	.|.|.	0|0|0	0|0|0	esv6055	.	.	13	.	.	pindel_D,WTSI_RP	.	.	AluYa5	TTTTTTTTTTTTTTTTTTTTTTTTTTTTTTTTTTTTTTTTTTTGAGACGGAGTCTCGCTCTGTCGCCCAGGCTGGAGTGCAGTGGCGGGATCTCGGCTCACTGCAAGCTCCGCCTCCCGGGTTCACGCCATTCTCCTGCCTCAGCCTCCCGAGTAGCTGGGACTACAGGCGCCCGCCACTACGCCCGGCTAATTTTTTGTATTTTTAGTAGAGACGGGGTTTCACCGTTTTAGCCGGGATGGTCTCGATCTCCTGACCTCGTGATCCGCCCGCCTCGGCCTCCCAAAGTGCTGGGATTACAGGCGTGAGCCACCGCGCCCGGCC	NA07037,NA11992,NA18520,NA18570,NA18577,NA18582,NA18964,NA12878,NA12891,NA12892
1	227026541	.	6	.	ALU	-	INS	P1_MEI_3385&P2_MEI_356	304	RP|SR	lowcov+trio	val	PCR	CEU	0.25|.|.	16|0|0	8|0|0	.	.	Xing|GR2009|1104685074864	15	15	0	MEI_SR,MEI_RP	68	.	AluY	ACGGAGGTCTCGCTCTGTCGCCCAGGCTGGAGTGCAGTGGCGCGATCTCGGCTCACTGCAAGCTCCGCCTCCCGGGTTCACGCCATTCTCCTGCCTCAGCCTCCCGAGTAGCTGGGACTACAGGCGCCCGCCACTACGCCCGGCTAATTTTTTGTATTTTTAGTAGAGACGGGGTTTCACCGTGTTAGCCAGGATGGTCTCGATCTCCTGACCTCGTGATCCGCCCGCCTCGGCCTCCCAAAGTGCTGGGATTACAGGCGTGAGCCACCGCCGCCCGGCC	NA07346,NA12043,NA12045,NA12812,NA12873,NA12891,NA18970,NA19141,NA19143,NA19239,NA19240
1	228560910	.	28	.	ALU	-	INS	P2_MEI_1337	62	RP	trio	NA	.	.	.|.|.	0|0|0	0|0|0	.	.	.	.	14	7	MEI_RP	40	GENE|PGBD5|ENSG00000177614			NA19239
1	229151768	.	1	.	ALU	+	INS	P1_MEI_3386&P2_MEI_2224	302	SR	lowcov+trio	NA	.	CEU	0.65|.|.	10|0|0	13|0|0	.	dbRIP_Alu_00495	.	14	4	14	MEI_SR	55	GENE|TTC13|ENSG00000143643	AluYb8	GACCGGGCGCGGTGGCGTCACGCCTGTAATCCCAGCACTTTGGGAGGGCCGAGGCGGGTGGAGTCATGAGGTCAGGAGATCGAGACCATCCTGGCTAACAAGGTGAAACCCCGTCTCTACTAAAAATACAAAAAATTAGCCGGGCGCGGTGGCGGGCGCCTGTAGTCCCAGCTACTCGGGAAGGACTGAGGCAGGAGAATGGCGTGAACCCGGGAAGCGGAGCTTGCAGTGAGCCGAGATTGCGCCACTGCAGTCCGCAGTCCGGCCTGGGGCGACAGAGCGAGACTCCGTCTACAAAAAAAAAAAAAAAA	NA11894,NA11931,NA12045,NA12249,NA12814,NA12872,NA12873,NA12878,NA18969,NA19240
1	229349507	.	18	.	ALU	+	INS	P1_MEI_1447	277	RP	lowcov	NA	.	YRI	0.00|0.08|0.00	36|38|39	0|6|0	.	.	.	3	15	4	MEI_RP	38	.			NA18499,NA18519,NA18907,NA19093,NA19108,NA19257
1	229369688	229369994	1	1	ALU	-	DEL	P1_M_061510_1_419&P2_M_061510_1_232	306	SR,RP	lowcov+trio	val	ASM	CEU+YRI+CHB+JPT	0.98|0.33|0.74	44|26|53	86|17|78	esv7591	.	.	11	.	.	bc_deletion,pindel_D,wtsi,PINDEL_SR,BC_RP,WASHU_RP,UWASH_RP	.	GENE|TRIM67|ENSG00000119283	AluYa5	TTTTTTTTTTTGAGACGGAGTCTCGCTCTGTCGCCCAGGCTGGAGTGCAGTGGCGGGATCTCGGCTCACTGCAAGCTCCGCCTCCCGGGTTCACGCCATTCTCCCGCCTCAGCCTCCCAAGTAGCTGGGACTACAGGCGCCCGCCACTACGCCCGGCTAATTTTTTGTATTTTTAGTAGAGACGGGGTTTCACCGTTTTAGCCGGGATGGTCTCGATCTCCTGACCTCGTGATCCGCCCGCCTCGGCCTCCCAAAGTGCTGGGATTACAGGCGTGAGCCACCGCGCCCGGCCGTCT	NA07037,NA11918,NA12004,NA18489,NA18499,NA18501,NA18504,NA18505,NA18508,NA18510,NA18519,NA18522,NA18523,NA18526,NA18532,NA18537,NA18542,NA18555,NA18558,NA18566,NA18571,NA18576,NA18579,NA18592,NA18605,NA18608,NA18638,NA18853,NA18856,NA18858,NA18861,NA18870,NA18871,NA18907,NA18912,NA18940,NA18951,NA18960,NA18961,NA18964,NA19093,NA19099,NA19102,NA19114,NA19129,NA19138,NA19172,NA19190,NA19238,NA19239…
1	229559816	.	10	.	ALU	-	INS	P1_MEI_3387	.	SR	lowcov	NA	.	.	0.00|.|.	16|0|0	0|0|0	.	.	.	.	1	0	MEI_SR	4	.			NA19141
1	229998716	.	9	.	ALU	+	INS	P1_MEI_3388&P2_MEI_1338	213	RP|SR	lowcov+trio	NA	.	CEU	0.06|.|.	16|0|0	2|0|0	.	.	.	14	0	1	MEI_SR,MEI_RP	22	GENE|DISC1|ENSG00000162946			NA12814,NA12891
1	230416775	.	166	.	ALU	-	INS	P2_MEI_1339	80	RP	trio	NA	.	.	.|.|.	0|0|0	0|0|0	.	.	.	.	11	10	MEI_RP	40	.			NA19239,NA19240
1	230489741	230490069	1	1	ALU	-	DEL	P1_M_061510_1_422&P2_M_061510_1_495	328	SR,AS,RP	lowcov+trio	val	ASM	CEU+YRI+CHB+JPT	0.37|0.20|0.20	38|40|52	28|16|21	esv3764	.	.	15	.	.	wtsi,washu,bc_deletion,pindel_D,WTSI_RP,WASHU_RP,UWASH_RP,OXFDU_AS,YALEU_SR,PINDEL_SR	.	.	AluYb8	TTTTTTTTTTTTTTTTTTTTTTTTGAGACGGAGTCTCGCTCTGTCGCCCAGGTGGGACTGCGGACTGCAGTGGCGCAATCTCGGCTCACTGCAAGCTCCGCTTCCCGGGTTCACGCCATTCTCCTGCCTCAGCCTCCCGAGTAGCTGGGACTACAGGCGCCCGCCACCGCGCCCGGCTAATTTTTTTTGTATTTTTAGTAGAGACGGGGTTTCACCTTGTTAGCCAGGATGGTCTCGATCTCCTGACCTCATGATCCACCCGCCTCGGCCTCCCAAAGTGCTGGGATTACAGGCGTGAGCCACCGCGCCCGGCC	NA07000,NA07037,NA07051,NA07346,NA07347,NA07357,NA10847,NA10851,NA11829,NA11830,NA11831,NA11881,NA11918,NA11919,NA11992,NA11994,NA11995,NA12003,NA12004,NA12005,NA12006,NA12043,NA12044,NA12045,NA12144,NA12154,NA12156,NA12249,NA12287,NA12489,NA12716,NA12717,NA12749,NA12750,NA12751,NA12761,NA12763,NA12776,NA12828,NA12878,NA12891,NA12892,NA18486,NA18489,NA18498,NA18499,NA18501,NA18502,NA18504,NA18505…
1	230654383	.	1	.	ALU	+	INS	P1_MEI_93&P2_MEI_357	291	RP|SR	lowcov+trio	val	PCR	CEU+YRI+CHB+JPT	0.18|0.31|0.49	53|45|47	19|28|46	.	.	Xing|GR2009|1104685320249	13	152	110	MEI_SR,MEI_RP	80	GENE|SIPA1L2|ENSG00000116991	AluY	GGGCGGCGGTGGCGTCACGCCTGTAATCCCAGCACTTTGGGAGGCCGAGGCGGGCGGATCACGAGGTCAGGAGATCGAGACCATCCTGGCTAACACGGTGAAACCCCGTCTCTACTAAAAATACAAAAAATTAGCCGGGCGTGGTAGCGGGCGCCTGTAGTCCCAGCTACTCGGGAGGCTGAGGCAGGAGAATGGCGTGAACCCGGGAGGCGGAGCTTGCAGTGAGCAGAGATCCCGCCACTGCACTCCAGCCTGGGCGACAGAGCGAGACTCCGTCTAACAAAAAAAAAAAAAAAAAAAAAAAAAAAAAA	NA07037,NA07346,NA07347,NA07357,NA10847,NA10851,NA11840,NA11918,NA12006,NA12043,NA12044,NA12249,NA12287,NA12489,NA12717,NA12749,NA12814,NA12828,NA12873,NA12878,NA12891,NA12892,NA18489,NA18502,NA18505,NA18508,NA18511,NA18522,NA18526,NA18537,NA18547,NA18550,NA18552,NA18555,NA18558,NA18561,NA18564,NA18566,NA18570,NA18571,NA18572,NA18573,NA18576,NA18577,NA18579,NA18582,NA18592,NA18593,NA18605,NA18608…
1	230842152	230842466	1	1	ALU	-	DEL	P1_M_061510_1_424&P2_M_061510_1_235	314	AS,SR,RP	lowcov+trio	val	PCR,ASM	CEU+YRI+CHB+JPT	0.47|0.74|0.55	44|52|57	41|77|63	esv4864	.	.	11	.	.	wtsi,bc_deletion,pindel_D,broad,washu,UWASH_RP,PINDEL_SR,WASHU_RP,BC_RP,OXFDU_AS,YALEU_SR	.	.	AluYa5	TTTTTTTTTTTTTTTTTTTTTTTTGAGACGGAGTCTCGCTCTGTCGCCCAGGCTGGAGTGCAGTGGCGGGATCTCGGCTCACTGCAAGCTCCGCCTCCCGGGTTCACGCCATTCTCCTGCCTCAGCCTCCCAAGTAGCTGGGACTACAGGCGCCCGCCACTACGCCCGGCTAATTTTTTGTATTTTTAGTAGAGACGGGGTTTCACCGTTTTAGCCGGGATGGTCTCGATCTCCTGACCTCGTGATCCGCCCGCCTCGGCCTCCCAAAGTGCTGGGATTACAGGCGTGAGCCACCGCGCCCGGC	NA06986,NA06994,NA07037,NA07051,NA07357,NA10847,NA10851,NA11829,NA11830,NA11831,NA11881,NA11894,NA11918,NA11919,NA11920,NA11931,NA11992,NA11993,NA12006,NA12043,NA12044,NA12144,NA12155,NA12156,NA12249,NA12287,NA12414,NA12489,NA12716,NA12717,NA12749,NA12751,NA12761,NA12776,NA12813,NA12828,NA12878,NA12891,NA12892,NA18486,NA18489,NA18499,NA18502,NA18505,NA18507,NA18510,NA18511,NA18516,NA18520,NA18526…
1	230935886	.	12	.	ALU	+	INS	P2_MEI_1340	215	RP	trio	NA	.	.	.|.|.	0|0|0	0|0|0	.	.	.	5	56	20	MEI_RP	40	GENE|BX284652.2|ENSG00000236497			NA12878,NA12891,NA12892,NA19238,NA19239,NA19240
1	231408728	.	5	.	ALU	+	INS	P1_MEI_3389	292	SR	lowcov	NA	.	CEU	0.08|.|.	13|0|0	2|0|0	.	.	.	13	1	1	MEI_SR	15	GENE|PCNXL2|ENSG00000135749	AluY	GGCCGGGCGCGGTGGCTCACGCCTGTAATCCCAGCACTTTGGGAGGCCGAGGCGGCGGATCACGAGGTCAGGAGATCGAGACCATCCTGGCTAAACACGGTGAAACCCCGTCTCTAACTAAAAAATACAAAAAAATTAGCCGGGCGTGGTAGCGGGCGCCTGTAGTCCCAGCTACTCGGGAGGCTGAGGCAGGAGAATGGCGTGAACCTGGGAGGCGGAGCTTGCAGTGAGCCGAGATCGCGCCACTGCACTCCAGCCTGGGCGACAGAGCGAGACTCCGTCTCAAAAAAAAAAAANAAAAAAAAGAA	NA11894
1	231585751	.	1	.	ALU	+	INS	P1_MEI_94&P2_MEI_1341	230	RP|SR	lowcov+trio	val	PCR	YRI+CHB+JPT	.|0.10|0.29	0|43|50	0|9|29	.	.	Iskow|CELL2010|FSTNXB304JN4XI	15	77	35	MEI_SR,MEI_RP	80	UTR|MAP3K19|ENSG00000143674			NA07000,NA07357,NA10847,NA11840,NA11931,NA11993,NA12044,NA12287,NA12489,NA12761,NA12812,NA12828,NA12872,NA12878,NA18507,NA18508,NA18519,NA18526,NA18537,NA18542,NA18545,NA18550,NA18552,NA18558,NA18561,NA18562,NA18571,NA18573,NA18576,NA18577,NA18579,NA18593,NA18608,NA18638,NA18944,NA18948,NA18953,NA18959,NA18960,NA18961,NA18980,NA19093,NA19108,NA19129,NA19225,NA19239
1	232137171	.	1	.	ALU	+	INS	P1_MEI_95&P2_MEI_358	294	RP|SR	lowcov+trio	val	PCR	CEU+YRI+CHB+JPT	0.35|0.23|0.20	53|44|49	37|20|20	.	.	Xing|GR2009|1104685320621	15	89	91	MEI_SR,MEI_RP	80	GENE|SLC35F3|ENSG00000183780	AluYa5	GGCCGGGCGCGGTGGCTCACGCCTGTAATCCCCAGCACTTTGGGGAGGCCGAGGCGGGCGGATCACGAGGTCAGGAGATCGAGACCATCCCGGCTAAAACCGGTGAAACCCCGTCTCTACTAAAAATACAAAAAAATTAGGCCGGGCGTAGTGGCGGGCGCCTGTAGTCCCAGCTACTTGGGAGGACTGAGGCAGGAGAATGGCGTGAACCCGGGAGGCGGAGCTTGCAGTGAGCCGAGATCCCGCCACTGCACTCCAGCCTGGGCGACAGAGCGAGACTCCGTCTCAAAAAAAAAAAAAAAAACAAA	NA07000,NA07037,NA07347,NA07357,NA10847,NA10851,NA11881,NA11894,NA11920,NA11931,NA11994,NA12004,NA12006,NA12144,NA12154,NA12155,NA12156,NA12249,NA12287,NA12717,NA12749,NA12751,NA12761,NA12763,NA12776,NA12812,NA12828,NA12873,NA12878,NA12891,NA18498,NA18502,NA18504,NA18507,NA18508,NA18510,NA18517,NA18519,NA18542,NA18545,NA18547,NA18550,NA18552,NA18564,NA18566,NA18570,NA18577,NA18579,NA18603,NA18608…
1	232189879	.	7	.	ALU	-	INS	P1_MEI_3390&P2_MEI_2225	.	SR	lowcov+trio	NA	.	.	0.00|.|.	13|0|0	0|0|0	.	.	Iskow|CELL2010|FSTNXB304H6YS3	.	4	0	MEI_SR	11	GENE|SLC35F3|ENSG00000183780			NA19143,NA19240
1	232629539	.	10	.	ALU	-	INS	P1_MEI_3391	.	SR	lowcov	NA	.	.	0.00|.|.	16|0|0	0|0|0	.	.	.	.	4	0	MEI_SR	8	GENE|TARBP1|ENSG00000059588			NA19141,NA19141,NA19141,NA19141
1	232653825	232654135	1	1	ALU	+	DEL	P1_M_061510_1_427&P2_M_061510_1_238	310	SR,RP	lowcov+trio	val	ASM	CEU+YRI+CHB+JPT	0.50|0.21|0.31	29|51|49	29|21|30	esv4245	.	.	9	.	.	washu,wtsi,pindel_D,broad,bc_deletion,UWASH_RP,YALEU_SR,WASHU_RP,WTSI_RP,BC_RP	.	GENE|TARBP1|ENSG00000059588	AluYa5	GGGCCGGGCGCGGTGGCTCACGCCTGTAATCCCAGCACTTTGGGAGGCCGAGGCGGGCGGATCACGAGGTCAGGAGATCGAGACCATCCCGGCTAAAAACGGTGAAACCCCGTCTCTACTAAAAATACAAAAAAATTAGCCGGGCGTAGTGGCGGGCGCCTGTAGTCCCAGCTACTTGGGAGGCTGAGGCAGGAGAATGGCGTGAACCCGGGAGGCGGAGCTTGCAGTGAGCCGAGATCCCGCCACTGCACTCCAGCCTGGGCGACAGAGCGAGACTCCGTCTCAAAAAAAAAAAAAAAAAA	NA06994,NA07000,NA07051,NA07357,NA10851,NA11829,NA11830,NA11831,NA11918,NA11920,NA11993,NA11994,NA12003,NA12004,NA12006,NA12043,NA12045,NA12156,NA12249,NA12287,NA12414,NA12716,NA12717,NA12750,NA12761,NA12776,NA12813,NA12878,NA12891,NA12892,NA18486,NA18489,NA18498,NA18499,NA18501,NA18502,NA18504,NA18505,NA18508,NA18510,NA18516,NA18517,NA18519,NA18520,NA18522,NA18523,NA18526,NA18537,NA18545,NA18547…
1	232872335	.	1	.	ALU	-	INS	P1_MEI_96&P2_MEI_359	295	RP|SR	lowcov+trio	val	PCR	CEU+YRI+CHB+JPT	0.51|0.49|0.15	52|43|49	53|42|15	.	.	Iskow|CELL2010|FSTNXB304IY38B	15	100	162	MEI_SR,MEI_RP	80	EXON|AL160408.5|ENSG00000230628	AluYa5	TTTTTTTTTTTTTTTTTTTTTTTTTTTTTGTAGGCGGAGTCTCGCTCTGTCACCCAGGCTGGAGTGCAGTGGCGGGATCTCGGCTCACTGCAAGCTCCGCCTCCCGGGTTCACGCCATTCTCCTTCCTCAGTCCTTTCCCTAAGTAGCTGGGACTACAGGCGCCCGCCACTACGCCCGGCTAATTTTTTGTATTTTTAGTAGAGACGGGGTTTCACCGTTTTAGCCGGGATGGTCTCGATCTCCTGACCTCGTGATCCGCCCGCCCTCGGCCTCCCAAAGTGCTGGGATTACAGGCGTGAGCCACCGCGCCCGGCC	NA07000,NA07037,NA07051,NA07346,NA07347,NA07357,NA10847,NA10851,NA11829,NA11894,NA11918,NA11919,NA11931,NA11992,NA11993,NA11994,NA11995,NA12003,NA12004,NA12006,NA12043,NA12044,NA12045,NA12154,NA12155,NA12234,NA12249,NA12287,NA12489,NA12716,NA12717,NA12750,NA12751,NA12761,NA12776,NA12812,NA12814,NA12815,NA12828,NA12873,NA12878,NA12891,NA12892,NA18489,NA18499,NA18502,NA18504,NA18505,NA18507,NA18508…
1	233167470	.	25	.	ALU	+	INS	P1_MEI_1448	248	RP	lowcov	NA	.	YRI	0.00|0.01|0.00	41|38|48	0|1|0	.	.	.	.	2	4	MEI_RP	12	GENE|AL391832.4|ENSG00000238005			NA18517
1	234121198	234121536	1	1	ALU	-	DEL	P1_M_061510_1_429&P2_M_061510_1_239	338	SR,RP	lowcov+trio	val	ASM	CEU+YRI+CHB+JPT	0.42|0.13|0.82	33|53|57	28|14|93	esv7675	.	.	16	.	.	wtsi,broad,bc_deletion,washu,pindel_D,BC_RP,UWASH_RP,YALEU_SR,WASHU_RP,WTSI_RP,PINDEL_SR	.	.	AluYb8	CTTTTTCTTTTTTTTTCTTTTTTTTTTTTTTTTTTGAGACGGAGTCTCGCTCTGTCGCCCAGGCCGGACTGCGGACTGCAGTGGCGCAATCTCGGCTCACTGCAAGCTCCGCCTCCCGGGTTCACGCCATTCTCCTGCCTCAGCCTCCCGAGTAGCTGGGACTACAGGCGCCCGCCACCGCGCCCGGCTAATTTTTTGTATTTTTAGTAGAGACGGGGTTTCACCTTGTTAGCCAGGATGGTCTCGATCTCCTGACCTCATGATCCACCCGCCTCGGCCTCCCAAAGTGCTGGGATTACAGGCGTGAGCCACCGCGCCCGGCC	NA06986,NA06994,NA07000,NA07051,NA07346,NA07347,NA07357,NA10847,NA10851,NA11829,NA11830,NA11831,NA11881,NA11894,NA11918,NA11920,NA11931,NA11995,NA12003,NA12004,NA12043,NA12044,NA12045,NA12144,NA12154,NA12155,NA12156,NA12249,NA12414,NA12489,NA12716,NA12717,NA12749,NA12750,NA12761,NA12763,NA12813,NA12828,NA12878,NA12891,NA12892,NA18486,NA18489,NA18498,NA18499,NA18501,NA18502,NA18504,NA18505,NA18507…
1	234604815	.	10	.	SVA	-	INS	P1_MEI_3392	1639	SR	lowcov	NA	.	.	.|.|.	0|0|0	0|0|0	.	.	.	.	0	3	MEI_SR	7	GENE|EDARADD|ENSG00000186197			NA12814,NA11881,NA12043
1	234615709	234617952	1	1	SVA	+	DEL	P1_M_061510_1_430&P2_M_061510_1_45	2243	RP	lowcov+trio	val	ASM	CEU+YRI+CHB+JPT	0.41|0.38|0.23	38|46|53	31|35|24	esv3512	.	.	17	.	.	broad,pindel_D,wtsi,washu,bc_deletion,WASHU_RP,UWASH_RP,WTSI_RP,AB_RP,BC_RP	.	GENE|EDARADD|ENSG00000186197	SVA_F	AGCTCTCTCCCTCTCCCTCTCCCTCTCCCTCTCCCTCTCCCTCTCCTCCCTCTCCCTCTCCCTCTCCCTCTCCCTCTCCCTCTCCTTTCCCTCTCCCCTCCCTCTCCCTCTCCCTCTCCCTCTCCCTCTCCCTCTCCTTTCCCTCTCCCCACGGTCTCCCTCTCATGCGGAGCCAAAGCTGGACTGTACTGCTGCCATCTCGGCTCACTGCAACCTCCCTGCCTGATTCTCCTGCCTCAGTCTGCCGAATGCCTGCAATTGCAGGCACGCGCCGCCACGCCTGACTGGTTTTGGTGGAGACGGGGTTTCGCTGTGTTGACCGGGCCGGTCTCCAGCCCCTAACCGCGAGTGATCCGCCAACCTCGGCCTCCCGAGGTGCCGGGATTGCAGACGGAGTCT…	NA06986,NA07000,NA07037,NA07051,NA07346,NA07347,NA07357,NA10847,NA10851,NA11829,NA11830,NA11831,NA11881,NA11894,NA11918,NA11919,NA11920,NA11931,NA11993,NA11995,NA12003,NA12004,NA12006,NA12043,NA12044,NA12144,NA12155,NA12156,NA12249,NA12287,NA12414,NA12489,NA12716,NA12717,NA12750,NA12751,NA12761,NA12776,NA12813,NA12878,NA12891,NA12892,NA18486,NA18489,NA18498,NA18499,NA18501,NA18502,NA18505,NA18507…
1	234661548	234661873	1	1	ALU	+	DEL	P1_M_061510_1_431&P2_M_061510_1_241	325	SR,RP	lowcov+trio	val	ASM	CEU+YRI+CHB+JPT	0.42|0.93|0.79	43|50|57	36|93|90	esv5800	.	.	14	.	.	broad,bc_deletion,wtsi,pindel_D,washu,WASHU_RP,PINDEL_SR,YALEU_SR,WTSI_RP,BC_RP	.	GENE|EDARADD|ENSG00000186197	AluYb8	GGGCCGGGCGCGGTGGCTCACGCCTGTAATCCCAGCACTTTGGGAGGCCGAGGCGGGTGGATCATGAGGTCAGGAGATCGAGACCATCCTGGCTAACAAGGTGAAACCCCGTCTCTACTAAAAATACAAAAAATTAGCCGGGCGCGGTGGCGGGCGCCTGTAGTCCCAGCTACTCGGGAGGCTGAGGCAGGAGAATGGCGTGAACCCGGGAAGCGGAGCTTGCAGTGAGCCGAGATTGCGCCACTGCAGTCCGCAGTCCGACCTGGGCGACAGAGCGAGACTCCGTCTCAAAAAAAAAAAAAAAAAAAAAAA	NA06994,NA07000,NA07037,NA07346,NA07347,NA07357,NA10847,NA10851,NA11829,NA11830,NA11881,NA11894,NA11918,NA11920,NA11931,NA11992,NA11993,NA11994,NA11995,NA12003,NA12004,NA12006,NA12044,NA12045,NA12144,NA12154,NA12155,NA12156,NA12249,NA12287,NA12414,NA12716,NA12717,NA12750,NA12751,NA12761,NA12813,NA12828,NA12878,NA12891,NA12892,NA18504,NA18519,NA18520,NA18522,NA18523,NA18537,NA18547,NA18550,NA18563…
1	235635817	.	1	.	ALU	-	INS	P1_MEI_97&P2_MEI_360	305	RP|SR	lowcov+trio	NA	.	CEU+YRI+CHB+JPT	0.26|0.12|0.42	53|44|46	28|11|39	.	.	.	26	69	90	MEI_SR,MEI_RP	80	GENE|RYR2|ENSG00000198626	AluYa5	TTTCTTTTTTTTTTTTTTTTTTTGTAGACGGAGTCTCGCTCTGTCGCCCAGGCTGGAGTGCAGTGGCGGGATCTCGGCTCACTGCAAGCTCCGCCTCCCGGGTTCACGCCATTCTCCTGCCTCAGTCCTCCCAAGTAGCTGGGACTACAGGCGCCCGCCACTACGCCCGGCTAATTTTTTGTATTTTTAGTAGAGACGGGGGTTTCACCGTTTTAGCCGGGATGGTCTCGATCTCCTGACCTCGTGATCCGCCCGCCTCGGCCTCCCAAAGTGCTGGGATTACAGGCGTGAGCCACCGCGCCCGGCC	NA06986,NA07000,NA10847,NA10851,NA11829,NA11830,NA11919,NA11920,NA11931,NA11992,NA11993,NA11994,NA12003,NA12006,NA12144,NA12234,NA12287,NA12414,NA12716,NA12749,NA12750,NA12761,NA12815,NA12828,NA12872,NA12874,NA12878,NA12891,NA12892,NA18499,NA18505,NA18517,NA18542,NA18547,NA18550,NA18552,NA18555,NA18561,NA18562,NA18564,NA18566,NA18571,NA18572,NA18573,NA18576,NA18577,NA18579,NA18593,NA18605,NA18609…
1	236034235	.	1	.	ALU	-	INS	P1_MEI_3393&P2_MEI_361	292	RP|SR	lowcov+trio	val	PCR	CEU	0.28|.|.	18|0|0	10|0|0	.	.	.	13	13	15	MEI_SR,MEI_RP	80	GENE|RYR2|ENSG00000198626	AluYa5	TTTTTTTTTTTTTTTGTAGACGGAGTCTCGCTCTGTCGCCCAGGCTGGAGTGCAGTGGCGCGATCTCGGCTCACTGCAAGCTCCGCCTCCCGGGTTCACGCCATTCTCCTGCCTCAGCCTCCCGAGTAGCTGGGACTACAGGGCGCCCGCCACTACGCCCGGCTAATTTTTTGTATTTTTAATAGAGACGGGGGTTTCACCGTTTTAGCCGGGATGGTCTCGATCTCCTGACCTCGTGATCCCGCCCCGCCTCGGCCTCCCAAAGTGCTGGGATTACAGGCGTGAGCCACCGCGCCCGGCC	NA11840,NA11894,NA12249,NA12287,NA12814,NA12874,NA12878,NA12892,NA18970,NA19238
1	237384168	.	55	.	ALU	+	INS	P1_MEI_1449	78	RP	lowcov	NA	.	YRI+CHB+JPT	.|0.03|0.05	0|37|44	0|2|4	.	.	.	.	7	4	MEI_RP	21	.			NA11831,NA12156,NA12717,NA18489,NA18545,NA18582,NA18609,NA18858
1	237492876	.	4	.	ALU	+	INS	P1_MEI_98&P2_MEI_362	228	RP|SR	lowcov+trio	val	PCR	CEU+YRI+CHB+JPT	0.12|0.42|0.08	53|45|49	13|38|8	.	dbRIP_Alu_00251	.	12	75	30	MEI_SR,MEI_RP	80	.			NA07051,NA07347,NA10851,NA11831,NA11894,NA11918,NA11993,NA12156,NA12249,NA12414,NA12776,NA18501,NA18502,NA18504,NA18507,NA18510,NA18511,NA18517,NA18520,NA18522,NA18523,NA18547,NA18552,NA18558,NA18561,NA18576,NA18856,NA18858,NA18861,NA18871,NA18909,NA18912,NA18916,NA18940,NA19099,NA19102,NA19108,NA19129,NA19137,NA19138,NA19141,NA19190,NA19225,NA19239,NA19240,NA19257
1	237846768	.	7	.	ALU	+	INS	P1_MEI_99&P2_MEI_1342	287	RP|SR	lowcov+trio	NA	.	CEU+YRI	0.11|0.35|.	54|44|0	12|31|0	.	.	.	9	50	40	MEI_SR,MEI_RP	80	GENE|CHRM3|ENSG00000133019			NA07000,NA10847,NA10851,NA11920,NA12045,NA12155,NA12287,NA12489,NA12716,NA12717,NA12763,NA12873,NA18498,NA18499,NA18501,NA18502,NA18510,NA18511,NA18516,NA18517,NA18522,NA18523,NA18562,NA18573,NA18608,NA18856,NA18858,NA18870,NA18907,NA18909,NA18912,NA19102,NA19116,NA19143,NA19190,NA19210,NA19238,NA19257
1	238683613	238683937	1	1	ALU	+	DEL	P1_M_061510_1_435&P2_M_061510_1_247	324	SR,RP	lowcov+trio	val	ASM	CEU+YRI+CHB+JPT	0.23|0.41|0.36	43|46|54	20|38|39	esv8951	.	.	17	.	.	wtsi,bc_deletion,pindel_D,broad,washu,WASHU_RP,PINDEL_SR,BC_RP,WTSI_RP,UWASH_RP,YALEU_SR	.	GENE|FMN2|ENSG00000155816	AluYb8	GGGCCGGGCGCGGTGGCTCACGCCTGTAATCCCAGCACTTTGGGAGGCCGAGGCGGGTGGATCATGAGGTCAGGAGATCGAGACCATCCTGGCTAACAAGGTGAAACCCCGTCTCTACTAAAAAGACAAAAAATTAGCCGGGCGCGGTGGCGGGCGCCTGTAGTCCCAGCTACTCGGGAGGCTGAGGCAGGAGAATGGCGTGAACCCGGGAAGCGGAGCTTGCAGTGAGCCGAGATTGCGCCACTGCAGTCCGCAGTCCGGCCTGGGCGACAGAGCGAGACTCTGCCTCAAAAAAAAAAAAAAAAAAA	NA06986,NA06994,NA07000,NA07037,NA07051,NA07346,NA07347,NA07357,NA10847,NA10851,NA11829,NA11830,NA11831,NA11881,NA11894,NA11918,NA11919,NA11920,NA11931,NA11992,NA11993,NA12003,NA12004,NA12005,NA12006,NA12043,NA12044,NA12045,NA12144,NA12154,NA12155,NA12156,NA12249,NA12287,NA12414,NA12489,NA12716,NA12717,NA12750,NA12751,NA12761,NA12763,NA12776,NA12813,NA12828,NA12878,NA12891,NA12892,NA18486,NA18489…
1	239216479	239216804	1	1	ALU	-	DEL	P1_M_061510_1_436&P2_M_061510_1_249	325	AS,SR,RP	lowcov+trio	val	ASM	CEU+YRI+CHB+JPT	0.19|0.21|0.13	32|43|39	12|18|10	esv3159	.	.	17	.	.	washu,bc_deletion,wtsi,pindel_D,WASHU_RP,YALEU_SR,BC_RP,UWASH_RP,WTSI_RP,OXFDU_AS,PINDEL_SR	.	GENE|RGS7|ENSG00000182901	AluYf4	TTTTTTTTTTTTTTTTTTTTTTTTTTTTTGAGACGGAGTCTCGCTGTCGCCCAGGCTGGAGTGCAGTGGCGCAATCTCGGCTCACTGCAGGCTCCGCCCCCTGGGGTTCACGCCATTCTCCTGCCTCAGCCTCCGGAGTAGCTGGGACTACAGGCGCCCGCCACCTCGCCCGGCTAATTTTTTGTATTTTTAGTAGAGACAGGGTTTCACCGTGTTAGCCAGGATGGTCTCGATCTCCTGACCTCGTGATCCGCCCGCCTCGGCCTCCCAAAGTGCTGGGATTACAGGCGTGAGCCACCGCGCCCGGCC	NA06986,NA07000,NA07037,NA07051,NA07346,NA07347,NA07357,NA10847,NA10851,NA11829,NA11830,NA11831,NA11881,NA11918,NA11919,NA11920,NA11931,NA11992,NA11994,NA11995,NA12003,NA12004,NA12006,NA12043,NA12044,NA12045,NA12154,NA12155,NA12156,NA12249,NA12287,NA12414,NA12716,NA12717,NA12749,NA12750,NA12751,NA12761,NA12776,NA12828,NA12878,NA12891,NA12892,NA18486,NA18489,NA18499,NA18501,NA18502,NA18504,NA18505…
1	239427160	239427475	1	1	ALU	-	DEL	P1_M_061510_1_438&P2_M_061510_1_251	315	AS,RP,SR	lowcov+trio	val	ASM	CEU+YRI+CHB+JPT	0.19|0.27|0.24	44|51|55	17|28|26	esv5275	.	.	16	.	.	bc_deletion,wtsi,broad,washu,pindel_D,YALEU_SR,UWASH_RP,PINDEL_SR,OXFDU_AS,WASHU_RP,WTSI_RP,BC_RP	.	GENE|RGS7|ENSG00000182901	AluYa5	TTTTTTTTTTTTTTTTTTTTGAGACGGAGTCTCGCTCTGTCGCCCAGGCTGGAGTGCAGTGGCGGGATCTCGGCTCACTGCAAGCTCCGCCTCCCGGGTTCACGCCATTCTCCTGCCTCAGCCTCCCAAGTAGCTGGGACTACAGGCGCCCGCCACTACGCCCGGCTAATTTTTTGTATTTTTAGTAGAGACGGGGTTTCACCGTTTTAGCCGGGATGGTCTCGATCTCCTGACCTCGTGATCCGCCCGCCTCGGCCTCCCAAAGTGCTGGGATTACAGGCGTGAGCCACCGCGCCCGGC	NA06986,NA06994,NA07000,NA07037,NA07051,NA07346,NA07347,NA07357,NA10847,NA10851,NA11829,NA11830,NA11831,NA11881,NA11894,NA11918,NA11919,NA11920,NA11931,NA11992,NA11993,NA11994,NA11995,NA12003,NA12004,NA12005,NA12006,NA12043,NA12044,NA12045,NA12144,NA12154,NA12155,NA12156,NA12249,NA12489,NA12716,NA12717,NA12749,NA12750,NA12761,NA12763,NA12776,NA12813,NA12828,NA12878,NA12891,NA12892,NA18486,NA18489…
1	239449725	.	17	.	ALU	?	INS	P1_MEI_1450	98	RP	lowcov	NA	.	YRI	0.00|0.06|0.00	40|42|47	0|5|0	.	.	.	6	4	7	MEI_RP	21	GENE|RGS7|ENSG00000182901			NA18508,NA18523,NA18861,NA19108
1	239686699	.	8	.	ALU	+	INS	P2_MEI_364	148	SR|RP	trio	val	PCR	.	.|.|.	0|0|0	0|0|0	.	.	.	12	39	21	MEI_SR,MEI_RP	40	.			NA12892,NA19239,NA19240
1	239975228	.	1	.	ALU	+	INS	P1_MEI_3394	294	SR	lowcov	val	PCR	CEU	0.12|.|.	17|0|0	4|0|0	.	.	Iskow|CELL2010|FSTNXB304I72X2	13	2	3	MEI_SR	20	GENE|WDR64|ENSG00000162843			NA11881,NA12043,NA12814
1	240071633	.	61	.	ALU	-	INS	P1_MEI_1451	51	RP	lowcov	NA	.	CEU	0.04|0.00|0.00	36|32|39	3|0|0	.	.	.	.	2	2	MEI_RP	8	.			NA10851,NA11831
1	240627243	.	10	.	L1	-	INS	P1_MEI_3395	5390	SR	lowcov	NA	.	CEU	0.09|.|.	11|0|0	2|0|0	.	.	.	.	0	2	MEI_SR	5	GENE|PLD5|ENSG00000180287			NA12873
1	242397796	.	20	.	ALU	+	INS	P2_MEI_1343	289	RP	trio	NA	.	.	.|.|.	0|0|0	0|0|0	.	.	.	.	48	35	MEI_RP	40	.			NA19239,NA19240
1	243144205	243144320	1	1	ALU	+	DEL	P2_M_061510_1_260	115	RP	trio	val	ASM	CEU+YRI+CHB+JPT	0.92|0.75|0.82	37|16|37	68|24|61	.	.	.	11	.	.	BC_RP,UWASH_RP	.	.	AluYa8	AGCGTGAACCCGGGAGGCGGAGCTTGCAGTGAGCCGAGATCCCGCCACTGCACTCCAGCCTGGGCGACAGAGCGAGACTCCGTCTCAAAAAAAAAAAAAAAAAAA	NA12878,NA19238,NA19239,NA19240
1	243242412	.	4	.	ALU	-	INS	P1_MEI_100&P2_MEI_365	304	RP|SR	lowcov+trio	NA	.	.	0.00|.|0.00	50|0|37	0|0|0	.	.	.	24	14	17	MEI_SR,MEI_RP	80	GENE|EFCAB2|ENSG00000203666	AluYa5	TTTTTTTTTTTTTTTTTTTTGTAGACGGAGTCTCGCTCTGTCGCCCAGGCTGGAGTGCAGTGGCGGGATCTCGGCTCACTGCAAGCTCCGCCTCCCGGGTTCACGCCATTCTCCTGCCTCAGCCTCCCAAGTAGCTGGGACTACAGGCACCCGCCACTACGCCCGGCTAATTTTTTTGTATTTTTAGTAGAGACGGGGTTTCACCATTTTTTTAGCCGGGATGGTCTCGATCTCCTGACCTCGTGATCCGCCCGCCTCGGCCTCCCAAAGTGCTGGGATTACAGGCGTGAGCCACCGCGCCCGGCC	NA18498,NA18501,NA18502,NA18508,NA18516,NA18517,NA19093,NA19138,NA19143,NA19147,NA19238,NA19240
1	244055930	.	3	.	ALU	-	INS	P1_MEI_101&P2_MEI_366	319	RP|SR	lowcov+trio	val	PCR	CEU	0.12|.|.	12|0|0	3|0|0	.	.	Xing|GR2009|1104685469765	40	15	1	MEI_SR,MEI_RP	80	GENE|SMYD3|ENSG00000185420	AluYa5	TTTCTTTTTTTTTNTTTTTTTTTTTTGTAGACGGAGTCTCGCTCTGTCGCCCAGGCTGGAGTGCAGTGGCGGGATCTCGGCTCACTGCAAGCTCCGCCTCCCGGGTTCACGCCATTCTCCTCGCCTCAGCCTCCCAAGTAGCTGGGACTACAGGCGCCCGCCACCACGCCCGGCTAATTTTTTGTATTTTTAGTAGAGACGGGGGTTTCACCGTTTTTAGCCGGGATGGTCTCGATCTCCTGACCTCGTGATCCGCCCGCCTCGGCCTCCCAAAGTGCTGGGATTACAGGCGTGAGCCACCGCGCCCAGCC	NA06986,NA07000,NA07037,NA07051,NA07346,NA07347,NA07357,NA10847,NA10851,NA11831,NA11840,NA11881,NA11894,NA11918,NA11919,NA11920,NA11931,NA11992,NA11993,NA11995,NA12003,NA12004,NA12006,NA12043,NA12044,NA12045,NA12144,NA12154,NA12155,NA12234,NA12249,NA12716,NA12717,NA12749,NA12751,NA12761,NA12763,NA12776,NA12812,NA12815,NA12828,NA12872,NA12878,NA12891,NA12892,NA18486,NA18489,NA18498,NA18501,NA18502…
1	244473325	.	6	.	ALU	-	INS	P1_MEI_3396&P2_MEI_367	308	RP|SR	lowcov+trio	val	PCR	CEU	0.12|.|.	16|0|0	4|0|0	.	.	.	26	12	0	MEI_SR,MEI_RP	47	GENE|SMYD3|ENSG00000185420			NA11840,NA12045,NA12878,NA12891,NA12892,NA19239
1	244632301	.	1	.	ALU	-	INS	P1_MEI_3397&P2_MEI_2226	134	SR	lowcov+trio	NA	.	.	.|.|.	0|0|0	0|0|0	.	.	.	4	5	3	MEI_SR	37	GENE|SMYD3|ENSG00000185420	AluYc	TTTTTTTTTTTTTTNTTTTTTTTTTTTTTTGAGACGGAGTCTCGCTCTGTCGCCCAGGCTGGAGTGCAGTGGCGCGATCTCGGCTCACCACAACCTCCGCCTCCCGGGTTCACGCCATTCTCCTGCCTCAGCCTCCCGAGTAGCTGGGACAACAACGCC	NA11840,NA12249,NA12287,NA12812,NA12815,NA12878
1	244658953	.	1	.	ALU	-	INS	P1_MEI_102&P2_MEI_1344	298	RP|SR	lowcov+trio	NA	.	YRI+CHB+JPT	.|0.20|0.28	0|46|46	0|18|26	.	.	Xing|GR2009|1104685469552	13	64	92	MEI_SR,MEI_RP	80	GENE|SMYD3|ENSG00000185420	AluY	TTTTTTTTGTTTTTTTTTTTTTTTTTTTGTTAGACGGAGTCTCGCTCTGTCGCCCAGGCTGGAGTGCAGTGGCGCGATCTCGGCTCACTGCAAGCTCCGCCTCCCGGGTTCACGCCATTCTCCTGCCTCAGCCTCCCGAGTAGCTGGGACTACAGGCGCCCGCTACCACGCCCGGCTAATTTTTTGTATTTTTAGTAGAGACGGGGTTTCACCTTGTTAGCCAGGATGGTCTCGATCTCCTGACCTCGTGATCCGCCCGCCTCGGCCTCCCAAAGTGCTGGGAGTTACAGGCGTGAGCCACCGCGCCCGGCC	NA06986,NA07357,NA10847,NA11831,NA11894,NA11920,NA11993,NA11994,NA12044,NA12045,NA12144,NA12155,NA12156,NA12716,NA12750,NA12751,NA12776,NA12812,NA12814,NA12872,NA12873,NA12891,NA18501,NA18505,NA18507,NA18510,NA18542,NA18558,NA18561,NA18562,NA18571,NA18573,NA18576,NA18577,NA18582,NA18593,NA18603,NA18605,NA18608,NA18609,NA18861,NA18871,NA18943,NA18944,NA18948,NA18960,NA18961,NA18965,NA18980,NA19099…
1	245094501	245094811	1	1	ALU	+	DEL	P1_M_061510_1_450&P2_M_061510_1_275	310	SR,RP	lowcov+trio	val	PCR,ASM	CEU+YRI+CHB+JPT	0.61|0.16|0.41	38|37|45	46|12|37	esv2857	.	.	15	.	.	washu,bc_deletion,wtsi,pindel_D,WASHU_RP,UWASH_RP,BC_RP,WTSI_RP,PINDEL_SR,YALEU_SR	.	GENE|AHCTF1|ENSG00000153207	AluYb8	CTTGGGAGGCCGAGGCGGGTGGATCATGAGGTCAGGAGATCGAGACCATCCTGGCTAACAAGGTGAAACCCCGTCTCTACTAAAAATACAAAAAAAAAAATTAGCCGGGCGCGGTGGCGGGCGCCTGTAGTCCCAGCTACTCGGGAGGCTGAGGCAGGAGAATGGCGTGAACCCGGGAAGCGGAGCTTGCAGTGAGCCGAGATTGCGCCACTGCAGTCCGCAGTCCGACCTGGGCGACAGAGCGAGACTCCGTCTCAAAAAAAAAAAAAAAAAAAAAAAAAAAAAAAAAAAAAAAA	NA06986,NA07000,NA07037,NA07051,NA07346,NA07347,NA10847,NA11829,NA11830,NA11894,NA11918,NA11920,NA11931,NA11992,NA11994,NA11995,NA12004,NA12043,NA12045,NA12144,NA12154,NA12155,NA12156,NA12249,NA12414,NA12717,NA12750,NA12751,NA12776,NA18489,NA18498,NA18499,NA18501,NA18502,NA18504,NA18505,NA18508,NA18510,NA18511,NA18516,NA18517,NA18519,NA18520,NA18522,NA18523,NA18526,NA18532,NA18537,NA18542,NA18545…
1	245381996	.	22	.	ALU	+	INS	P2_MEI_1345	214	RP	trio	NA	.	.	.|.|.	0|0|0	0|0|0	.	.	.	.	14	15	MEI_RP	40	GENE|ZNF124|ENSG00000196418			NA19239
1	245676398	.	10	.	L1	+	INS	P1_MEI_3398	4429	SR	lowcov	NA	.	CEU	0.03|.|.	16|0|0	1|0|0	.	.	.	.	1	0	MEI_SR	4	GENE|NLRP3|ENSG00000162711			NA12814
1	245819215	.	75	.	ALU	+	INS	P1_MEI_1452	223	RP	lowcov	NA	.	CEU	0.04|0.00|0.00	39|34|37	3|0|0	.	.	.	.	7	2	MEI_RP	18	GENE|AL606804.1|ENSG00000236817			NA12249,NA12750,NA12751
1	245917085	245923138	1	1	L1	+	DEL	P1_M_061510_1_452&P2_M_061510_1_282	6053	RP,AS,RD,SR	lowcov+trio	val	ASM	CEU+YRI+CHB+JPT	0.15|0.33|0.07	41|43|46	12|28|6	esv5114	.	.	13	.	.	wtsi,pindel_D,bc_deletion,broad,washu,YALEU_SR,YALEU_RD,OXFDU_AS,BC_RP,YALEU_RP,PINDEL_SR,WASHU_RP,WTSI_RP,UWASH_RP	.	GENE|AC118470.1|ENSG00000235749	L1HS	CGAGGAGGAGCCAAGATGGCCGAATAGGAACAGCTCCGGTCTACAGCTCCCAGCGTGAGCGACGCAGAAGACGGGTGATTTCTGCATTTCCATCTGAGGTACCGGGTTCATCTCAATAGGGAGTGCCAGACAGTGGGCGCAGGCCAGTGTGTGTGCGCACCGTGCGCAAGCCGAAGCAGGGCGAGGCATTGCCTCACCTGGGAAGTGCAAGGGGTCAGGGAGTTCCCTTTCCGAGTCAAAGAAAGGGGTGACGGACGTACCTGGAAAATCGGGTCACTCCCACCCGAATATTGCGCTTTTCAGACTGGCTTAAGAAACGGCGCACCACGAGACTATATCCCACACCTGGCTCAGAGGGTCCTACGCCCACGGAATCTCGCTGATTGCTAGCACAGCAGT…	NA06986,NA06994,NA07000,NA07037,NA07051,NA07346,NA07347,NA07357,NA10847,NA10851,NA11830,NA11881,NA11894,NA11918,NA11919,NA11920,NA11931,NA11992,NA11993,NA11994,NA11995,NA12003,NA12004,NA12006,NA12043,NA12044,NA12045,NA12144,NA12154,NA12155,NA12156,NA12249,NA12287,NA12414,NA12716,NA12717,NA12749,NA12750,NA12751,NA12761,NA12763,NA12776,NA12813,NA12828,NA12878,NA12891,NA12892,NA18486,NA18489,NA18498…
1	245931741	.	23	.	ALU	+	INS	P1_MEI_1453	244	RP	lowcov	NA	.	YRI	0.00|0.12|0.00	38|33|40	0|8|0	.	.	.	.	10	6	MEI_RP	32	GENE|AC118470.1|ENSG00000235749			NA18501,NA18504,NA18519,NA18856,NA18861,NA19093
1	246118102	246124261	5	6	L1	-	DEL	P1_M_061510_1_721	6159	RP,SR	lowcov	val	.	CEU+YRI+CHB+JPT	0.18|0.26|0.17	42|50|54	15|26|18	esv2976	.	.	.	.	.	pindel_D,broad,washu	.	.	L1PA2	GCATGTATTTATTTATTTATATATTTATTTATTTTTTAACAAAGAAAAAATGTATTTATTGAGCATTCACTACAAAAACTAGTTTTTCTGTAGGCAGAGATCTTAATGATTTTTTTTAATTAATTTATTTATTTTTTCTTTTTTTATTTATTTTTTAATTATACTTTAAGTTTTAGGGTACATGTGCACATTGTGCAGGTTAGTTACATATGTATACATGTGCCATGCTGGTGCGCTGCACCCACTAACTCGTCATCTAGCATTAGGTATATCTCCCAATGCTATCCCTCCTCCCTCCCCCCTCCCCACCACAGTCCCCAGAGTGTGATATTCCCCTTCCTGTGTCCATGTGATCTCATTGTTCAATTCCCATCTATGAGTGAGAATATGTGGTGTTTG…	NA06986,NA07000,NA07037,NA07051,NA07346,NA07347,NA07357,NA10847,NA10851,NA11829,NA11831,NA11881,NA11894,NA11919,NA11920,NA11931,NA11992,NA11993,NA11994,NA11995,NA12003,NA12004,NA12006,NA12043,NA12044,NA12045,NA12144,NA12154,NA12155,NA12156,NA12249,NA12287,NA12414,NA12489,NA12716,NA12717,NA12749,NA12750,NA12751,NA12761,NA12763,NA12776,NA12828,NA12878,NA12891,NA12892,NA18486,NA18489,NA18498,NA18499…
1	246274431	246274759	1	1	ALU	+	DEL	P1_M_061510_1_454&P2_M_061510_1_283	328	SR,RP	lowcov+trio	val	ASM	CEU+YRI+CHB+JPT	0.86|0.32|0.66	42|37|54	72|24|71	.	.	.	15	.	.	washu,bc_deletion,wtsi,pindel_D,broad,WASHU_RP,UWASH_RP,BC_RP,PINDEL_SR	.	GENE|OR2L13|ENSG00000196071	AluYb8	CGGCCGGGCGCGGTGGCTCACGCCTGTAATCCCAGCACTTTGGGAGGCCGAGGCGGGTGGATCATGAGGTCAGGAGATCGAGACCATCCTGGCTAACAAGGTGAAACCCCGTCTCTACTAAAAATACAAAAAATTAGCCGGGCGCGGTGGCGGGCGCCTGTAGTCCCAGCTACTCGGGAGGCTGAGGCAGGAGAATGGCGTGAACCCGGGAAGCGGAGCTTGCAGTGAGCCGAGATTGCGCCACTGCAGTCCGCAGTCCGACCTGGGCGACAGAGCGAAACTCCGTCTCAAAAAAAAAAAAAAAAAAAAAAAAA	NA06986,NA06994,NA07000,NA07347,NA11881,NA11894,NA11918,NA11919,NA11995,NA12004,NA12044,NA12045,NA12144,NA12761,NA12763,NA12813,NA12892,NA18486,NA18489,NA18498,NA18499,NA18501,NA18502,NA18504,NA18505,NA18507,NA18508,NA18510,NA18511,NA18516,NA18517,NA18519,NA18520,NA18522,NA18523,NA18526,NA18532,NA18542,NA18550,NA18552,NA18558,NA18561,NA18570,NA18572,NA18576,NA18577,NA18579,NA18593,NA18605,NA18638…
1	246292302	.	10	.	ALU	+	INS	P1_MEI_3399	.	SR	lowcov	NA	.	CEU	0.07|.|.	15|0|0	2|0|0	.	.	.	.	0	2	MEI_SR	5	GENE|OR2L13|ENSG00000196071			NA12873,NA12873
1	246580210	.	8	.	ALU	+	INS	P2_MEI_1346	176	RP	trio	NA	.	.	.|.|.	0|0|0	0|0|0	.	.	.	13	28	37	MEI_RP	40	.			NA19239,NA19240
1	246906175	246907526	70	73	SVA	+	DEL	P1_M_061510_1_723	1351	RP	lowcov	NA	.	.	.|.|.	0|0|0	0|0|0	esv5310	.	.	.	.	.	broad	.	.	SVA_D	TTTACGCTCTCCCTCTCCCCTCTCCCCTCTCCCCTCTCCCTCTCCCTCTCCCTCTCCCTCTCCCTCTCCCTCTCTTTCCACGGTCTCCCTCTGATGCCGAGCCGAAGCTGGACTGTACTGCTGCGATCTCGGCTCACTGCAACCTCCCTGCCTGATTCTCCTGCCTCAGCCTGCCGAGTGCCTGCGATTGCAGGGGCGCACCGCCACGCCTGACTGGTTTTCGTATTTTTTTGGTGGAGACGGGGTTTCGCTGTGTTGGCCGGGCTGGTCTCCAGCTCCTAACCGCGAGTGATCCGCCAGCCTCGGCCTCCCGGAGGTGCCGGGATTGCAGACGGAGTCTCGTTCACTCAGTGCTCAATGGTGCCCAGGCTGGAGTGCAGTGGTGTGATCTCGGCTCGC…	NA07000,NA07357,NA11881,NA11894,NA11918,NA12004,NA12044,NA12156,NA12828,NA12878,NA12891,NA18489,NA18501,NA18502,NA18505,NA18519,NA18550,NA18555,NA18561,NA18570,NA18572,NA18573,NA18605,NA18853,NA18909,NA18912,NA18916,NA18943,NA18948,NA18968,NA18972,NA18973,NA18976,NA18981,NA19005,NA19098,NA19099,NA19129,NA19144,NA19160,NA19171,NA19190,NA19210
2	557373	.	10	.	ALU	-	INS	P1_MEI_3400	279	SR	lowcov	inval	PCR	CEU	0.03|.|.	15|0|0	1|0|0	.	.	.	.	0	1	MEI_SR	4	GENE|AC093326.2|ENSG00000233633			NA07347
2	642658	.	7	.	ALU	+	INS	P1_MEI_103	212	SR|RP	lowcov	NA	.	CEU+CHB+JPT	0.10|.|0.05	48|0|40	10|0|4	.	.	Xing|GR2009|1104685353303	14	23	15	MEI_SR,MEI_RP	40	.			NA07051,NA10851,NA11829,NA11920,NA11993,NA12003,NA12144,NA12716,NA12812,NA12814,NA18507,NA18564,NA18570,NA18940,NA19114,NA19116,NA19143,NA19147
2	1136204	.	10	.	L1	+	INS	P1_MEI_3401	.	SR	lowcov	NA	.	CEU	0.04|.|.	14|0|0	1|0|0	.	.	.	.	0	1	MEI_SR	4	GENE|SNTG2|ENSG00000172554			NA12814
2	1184852	.	4	.	ALU	+	INS	P1_MEI_104&P2_MEI_428	299	RP|SR	lowcov+trio	NA	.	CEU+YRI	0.33|0.27|.	41|35|0	27|19|0	.	.	.	10	56	78	MEI_SR,MEI_RP	80	GENE|SNTG2|ENSG00000172554	AluY	GGCCGGGCGCGGTGGCTCACGCCCTGTAATCCCAGCACTTTGGGAGGCCGAGGCGGGCGGATCACGAGGTCAGGAGATCGAGACCATCCTGGCTAACACGGTGAAACCCCCGTCTCTACTAAAAATACAAAAAATTAGCCGGGCGTGGTAGCGGGCACCTGTAGTCCCAGCTACTCGGGAGGCTGAGGCAAGAGAATGGCGTGAACCTGGGAGGCGGAGCGTGCAGTGAGCCGAGATCGTGCCACTGCACTCCAGGCTGGGCGACAGAGCGAGACTCCGTCTACAAAAAAAAAAAAAA	NA06986,NA07000,NA07051,NA07346,NA07347,NA10851,NA11993,NA12006,NA12043,NA12044,NA12154,NA12249,NA12287,NA12716,NA12751,NA12763,NA12872,NA12891,NA12892,NA18498,NA18508,NA18510,NA18519,NA18522,NA18523,NA18526,NA18532,NA18542,NA18545,NA18547,NA18550,NA18552,NA18555,NA18558,NA18562,NA18564,NA18571,NA18572,NA18573,NA18576,NA18577,NA18579,NA18593,NA18603,NA18608,NA18609,NA18856,NA18870,NA18907,NA18916…
2	1381180	.	10	.	L1	-	INS	P1_MEI_3402	.	SR	lowcov	NA	.	CEU	0.07|.|.	14|0|0	2|0|0	.	.	.	.	1	0	MEI_SR	4	GENE|TPO|ENSG00000115705			NA11918
2	1450723	.	4	.	ALU	-	INS	P1_MEI_3403&P2_MEI_2267	296	SR	lowcov+trio	NA	.	CEU	0.23|.|.	13|0|0	6|0|0	.	.	.	14	10	1	MEI_SR	43	GENE|TPO|ENSG00000115705			NA12287,NA12814,NA12815,NA12873,NA12878,NA19141,NA19240
2	2240440	2242223	65	56	L1	+	DEL	P1_M_061510_2_69	1783	RP	lowcov	NA	.	.	.|.|.	0|0|0	0|0|0	.	.	.	.	.	.	bc_deletion	.	GENE|MYT1L|ENSG00000186487	L1HS	AGGTATTTTATTCTCTTTGAGGCAAGGATGTGAAGGACCTCTTCAAGGAGAACTACAAACCACTGCTCAAGGAAATAAAAGAGGACACAAACAAATGGAAGAACATTCCATGCTCCTGGGTAGGAAGAATCAATATCGTGAAAATGGCCATACTGCCCAAGGTAATCTACAGATTCAATGCCATCCCCATCAAGCTACCAATGACTTTCTTCACAGAATTGGAAAAAACTACTTTAAAGTTCATATGGAACCAAAAAAGAGCCCGCATCGCCAAGTCAATCCTAAGCCAAAAGAACAAAGCTGGAGGCATCACACTACCTGACTTCAAACTATACTACAGGGCTACAGTAACCAAAACAGCATGGTACTGGTACCAAAACAGAGATATAGATCAATGGA…	NA18510,NA18520,NA19102
2	2518941	.	1	.	ALU	-	INS	P1_MEI_105&P2_MEI_474	295	RP|SR	lowcov+trio	val	PCR	CEU+YRI+CHB+JPT	0.37|0.16|0.53	51|41|50	38|13|53	.	.	Xing|GR2009|1104685073984	15	105	148	MEI_SR,MEI_RP	80	.	AluYf4	TTTTTTTTTTTTTTTTTTTTTTTTTTTTGAGACGGAGTCTCGCTGTCGCCCAGGGCTGGAGTGCAGTGGCGCAATCTCGGCTCACTGCAGGCCTCCGCCCCCTCGGGGTTCACGCCATTCTCCTGCCTCAGCCTCCCGTAGTAGCTGGGACTACAGGCGCCCGCCACCTCGCCCGGCTAATTTTTTTGTATTTTTAGTAGAGACGGGGGTTTCACCGTGTTAGCCAGGATGGTCTCGATCTCCTGACCTCGTGATCCGCCCGCCTCGGCCTCCCAAAGTGCTGGGATTACAGGCGTGAGCCACCGCGCCCGGTC	NA07000,NA07037,NA07051,NA07346,NA07347,NA07357,NA10851,NA11830,NA11831,NA11881,NA11918,NA11920,NA11931,NA12003,NA12006,NA12043,NA12044,NA12045,NA12154,NA12155,NA12156,NA12234,NA12249,NA12489,NA12716,NA12749,NA12750,NA12751,NA12761,NA12776,NA12814,NA12815,NA12828,NA12872,NA12873,NA12874,NA12878,NA12891,NA12892,NA18501,NA18502,NA18505,NA18523,NA18526,NA18532,NA18537,NA18542,NA18547,NA18550,NA18552…
2	3507149	.	10	.	ALU	+	INS	P1_MEI_3404	.	SR	lowcov	NA	.	.	.|.|.	0|0|0	0|0|0	.	.	.	.	0	3	MEI_SR	5	.			NA12812,NA18969
2	3696331	.	7	.	ALU	+	INS	P1_MEI_1454&P2_MEI_1479	290	RP	lowcov+trio	NA	.	CEU+YRI+CHB+JPT	0.20|0.27|0.02	43|39|42	17|21|2	.	.	Xing|GR2009|1104685041235	10	14	40	MEI_RP	80	GENE|ALLC|ENSG00000151360	AluYb8	GGCCGGGCGCGGTGGCTCACGCCTGTAATCCCAGCACTTTGGGAGGCCGAGGCGGGTGGATCATGAGGTCAGGAGATCGAGACCATCCTGGCTAAACAAGGTGAAACCCCGTCTCTACTAAAAATACAAAAAATTAGCCGGGCGCGGTGGCGGGCGCCTGTAGTCCCAGCTACTCGGGAGGCTGAGGCAGGAGAATGGCGTGAACCCGGGAAGCGGAGCTTGCAGTGAGCCGAGATTGCGCCACTGCAGTCCGCAGTCCGACCTGGGCGACAGAGCGAGACTCCATCTCAAAAAAAAAAAAAACAAAAAAAGAAGAA	NA07037,NA07357,NA11830,NA11831,NA11918,NA11919,NA11920,NA11993,NA12003,NA12154,NA12489,NA12716,NA12891,NA18498,NA18499,NA18501,NA18507,NA18508,NA18519,NA18570,NA18853,NA18870,NA18871,NA18907,NA18916,NA18960,NA19099,NA19114,NA19147,NA19190,NA19239,NA19240
2	4234012	.	9	.	ALU	+	INS	P1_MEI_106	150	SR|RP	lowcov	val	PCR	CEU+CHB+JPT	0.06|0.00|0.01	48|37|41	6|0|1	.	.	.	1	11	9	MEI_SR,MEI_RP	40	.	AluYf4	GGCCGGGCGCGGTGGCTCACGCCTGTAATCCCAGCACTTTGGGAGGCCGAGGCGGGTGGATCACGAGGTCAGGAGATCGAGACCATCCTGGCTAACACGGTGAAACCCCGTCTCTACTAAAAAATACAAAAAATTAAGCCGGGCGAGGTGGCGGGCGCCTGTAGTCCCAGCTAACTACGGGAGGCTGAGGCAGGAGAATGGCGTGAACCCCAGGGGGCGGAGCCTGCAGTGAGCCGAGATTGCGCCACTGCACTCCAACCTGGGCGACAGCGAGACTCCGGTACTACAAAAAAAAAAAAAAAAAAANAAAAAAAAAA	NA11881,NA11920,NA12045,NA12717,NA12749,NA18562
2	4759166	4765231	1	1	L1	+	DEL	P1_M_061510_2_75&P2_M_061510_2_381	6065	AS,RP,SR,RD	lowcov+trio	val	ASM	CEU+YRI+CHB+JPT	0.12|0.32|0.11	26|38|36	6|24|8	esv3799	.	.	19	.	.	pindel_D,wtsi,bc_deletion,washu,broad,YALEU_RD,YALEU_SR,WTSI_RP,BC_RP,YALEU_RP,UWASH_RP,WASHU_RP,OXFDU_AS	.	.	L1HS	AGAGAGCACCGAGGGAGGAGCCAAGATGGCCGAATAGGAACAGCTCCGGTCTACAGCTCCCAGCGTGAGCGACGCAGAAGACGGTGATTTCTGCATTTCCATCTGAGGTACCGGGTTCATCTCACTAGGGAGTGCCAGACAGTGGGCGCAGGCCAGTGTGTGTGCGCACCGTGCGCGAGCCGAAGCAGGGCGAGGCATTGCCTCACCTGGGAAGCGCAAGGGGTCAGGGAGTTCCCTTTCCGAGTCAAAGAAAGGGGTGACGGACGCACCTGGAAAATCGGGTCACTCCCACCCGAATATTGCGCTTTTCAGACCGGCTTAAGAAACGGCGCACCACGAGACTATATCCCACACCTGGCTCGGAGGGTCCTACGCCCACGGAATCTCGCTGATTGCTAG…	NA06986,NA07000,NA07037,NA07051,NA07346,NA07347,NA07357,NA10847,NA10851,NA11829,NA11830,NA11831,NA11881,NA11894,NA11918,NA11919,NA11920,NA11931,NA11992,NA11993,NA11994,NA11995,NA12003,NA12004,NA12006,NA12043,NA12044,NA12045,NA12144,NA12154,NA12155,NA12156,NA12249,NA12287,NA12414,NA12489,NA12716,NA12717,NA12749,NA12750,NA12751,NA12761,NA12763,NA12776,NA12813,NA12828,NA12878,NA12891,NA12892,NA18486…
2	5126627	5126953	1	1	ALU	+	DEL	P1_M_061510_2_76&P2_M_061510_2_386	326	AS,RP,SR	lowcov+trio	val	ASM	CEU+YRI+CHB+JPT	0.23|0.32|0.28	32|41|39	15|26|22	esv3133	.	.	14	.	.	broad,washu,wtsi,pindel_D,bc_deletion,YALEU_SR,UWASH_RP,WTSI_RP,PINDEL_SR,OXFDU_AS,BC_RP,WASHU_RP	.	.	AluYg6	TGGCCGGGCGCGGTGGCTCACGCCTGTAATCCCAGCACTTTGGGAGGCCGAGACGGGCGGATCACGAGGTCAGGAGATCGAGACCATCCTGGCTAACACGGTGAAACCCCGTCTCTACTAAAAATACAAAAATTAGCCGGGCATGGTGGCGCGTGCCTGTAGTCCCAGCTACACAGGAGGCTGAGGCAGGAGAATGGCGTGAACCCGGGAGGCGGAGCTTGCAGTGAGTCGAGATCGCGCCACTGCACTCCAGCCTGGGCGACAGAGCGAGACTCCGTCTCAAAAAAAAAAAAAAAAAAAAAAAAAAAAAAAA	NA06986,NA06994,NA07000,NA07037,NA07051,NA07346,NA07347,NA07357,NA10847,NA10851,NA11829,NA11830,NA11831,NA11881,NA11894,NA11918,NA11919,NA11920,NA11992,NA11993,NA11994,NA11995,NA12003,NA12004,NA12005,NA12006,NA12043,NA12044,NA12144,NA12154,NA12155,NA12249,NA12287,NA12414,NA12489,NA12716,NA12717,NA12749,NA12750,NA12751,NA12761,NA12763,NA12776,NA12813,NA12878,NA12891,NA12892,NA18486,NA18489,NA18498…
2	5405219	5405486	1	1	ALU	-	DEL	P1_M_061510_2_79&P2_M_061510_2_391	267	RP,SR	lowcov+trio	val	ASM	CEU+YRI	0.38|0.17|.	29|32|0	22|11|0	esv4258	.	.	14	.	.	bc_deletion,washu,pindel_D,YALEU_SR,PINDEL_SR,BC_RP,WASHU_RP,UWASH_RP	.	.	AluYa5	TTTTTTTTTTTTTTTTTTTTTTTTTTTTTTTTTTGAGACGGAGTCTCGCTCTGTCGCCCAGGCTGGAGTGCAGTGGCGCAATCTCGGCTCACTGCAAGCTCCGCCTCCCGGGTTCACGCCATTCTCCTGCCTCAGCCTCCCGAGTAGCTGGGACTACAGGCGCCCGCCACTACGCCCGGCTAATTTTTTGTATTTTTAGTAGAGACGGGGTTTCACCGTTTTAGCCGGGATGGTCTCGATCTCCTGACCTCGTG	NA06986,NA07037,NA07051,NA07346,NA07347,NA10847,NA10851,NA11829,NA11831,NA11918,NA11931,NA11992,NA11993,NA11995,NA12003,NA12006,NA12044,NA12144,NA12154,NA12155,NA12156,NA12249,NA12287,NA12414,NA12717,NA12749,NA12750,NA12761,NA12776,NA12828,NA18498,NA18499,NA18501,NA18504,NA18505,NA18507,NA18508,NA18510,NA18511,NA18516,NA18517,NA18520,NA18522,NA18523,NA18526,NA18537,NA18542,NA18545,NA18547,NA18555…
2	5480346	.	1	.	ALU	+	INS	P1_MEI_107&P2_MEI_1483	287	RP|SR	lowcov+trio	NA	.	CEU+YRI+CHB+JPT	0.12|0.05|0.46	52|44|47	12|4|43	.	.	.	16	77	73	MEI_SR,MEI_RP	58	.	AluYb8	GGCCGGGCGCGGTGGCTCACGCCTGTAATCCCAGCACTTTGGGAGGCCGAGGCGGGGTGGATCATGAGGTCAGGAGATCGAGACCATCCTGGCTAACAAGGTGAAACCCCGTCTCTACTAAAAATACAAAAAATTAGCCGGGCGCCGGTGGCGGGCGCCTGTAGTCCCAGCTACTCGGGAGGAACTAGAGGCAGGAGAATGGCGTGAACCCGGGAAGCGGAGCTTGCAGTGAGCCGAGATTGCGCCACTGCAGTCCGCAGTCCGACCTGGGCGACAGAGCGAGACTCCGTCTACAAAAAAAAAAAAAAAAAAAAAAAAAAAAAA	NA07051,NA07346,NA07357,NA11830,NA11831,NA11881,NA11918,NA11992,NA12045,NA12287,NA12414,NA12763,NA12873,NA12874,NA12891,NA18537,NA18547,NA18550,NA18552,NA18555,NA18561,NA18563,NA18564,NA18566,NA18570,NA18571,NA18572,NA18573,NA18576,NA18577,NA18579,NA18592,NA18593,NA18603,NA18608,NA18609,NA18638,NA18871,NA18916,NA18940,NA18944,NA18947,NA18960,NA18964,NA18965,NA18970,NA18973,NA18980,NA19005,NA19114
2	6434868	.	7	.	ALU	+	INS	P1_MEI_3405&P2_MEI_2294	.	SR	lowcov+trio	NA	.	CEU	0.11|.|.	14|0|0	3|0|0	.	.	Iskow|CELL2010|FSTNXB304H2WWO	.	0	5	MEI_SR	12	.			NA12234,NA12814,NA19141,NA19240
2	6477457	6477784	1	1	ALU	-	DEL	P1_M_061510_2_83&P2_M_061510_2_403	327	SR,RP	lowcov+trio	val	ASM	CEU+YRI+CHB+JPT	0.99|0.71|0.89	41|53|50	81|75|89	.	.	.	15	.	.	wtsi,pindel_D,washu,broad,bc_deletion,WASHU_RP,UWASH_RP,BC_RP	.	.	AluYa5	TTTTTTTTTTTTTTTTTTTTTTTTTTTTTTTTTGAGACGGAGTCTCGCTCTGTCGCCCAGGCTGGAGTGCAGTGGCGGGATCTCGGCTCACTGCAAGCTCCGCCTCCCGGGTTCACGCCATTCTCCCGCCTCAGCCTCCCAAGTAGCTGGGACTACAGGCGCCCGCCACTACGCCCGGCTAATTTTTTGTATTTTTAGTAGAGACGGGGTTTCACCGTTTTAGCTGGGATGGTCTCGATCTCCTGACCTCGTGATCCGCCCGCCTCGGCCTCCCAAAGTGCTGGGATTACAGGCGTGAGCCACCGCGCCCGGC	NA06994,NA07000,NA11829,NA11830,NA11993,NA12751,NA12813,NA18501,NA18502,NA18504,NA18505,NA18508,NA18510,NA18511,NA18517,NA18520,NA18523,NA18542,NA18552,NA18562,NA18566,NA18582,NA18603,NA18853,NA18858,NA18861,NA18870,NA18871,NA18942,NA18943,NA18945,NA18947,NA18949,NA18951,NA18952,NA18953,NA18956,NA18965,NA18967,NA18968,NA18971,NA18972,NA18974,NA18975,NA18976,NA18981,NA19005,NA19098,NA19102,NA19116…
2	6715725	.	5	.	L1	-	INS	P1_MEI_1455&P2_MEI_1490	2150	RP	lowcov+trio	NA	.	CEU+YRI+CHB+JPT	0.15|0.12|0.04	47|43|48	14|10|4	.	.	.	14	16	51	MEI_RP	80	.			NA06986,NA07037,NA07346,NA07347,NA11831,NA11919,NA11993,NA12003,NA12156,NA12716,NA12761,NA18504,NA18510,NA18552,NA18608,NA18909,NA18948,NA18951,NA19099,NA19116,NA19138,NA19190,NA19225,NA19239,NA19240
2	6968053	.	20	.	L1	+	INS	P1_MEI_1456	119	RP	lowcov	NA	.	CEU+YRI+CHB+JPT	0.23|0.04|0.02	32|27|41	15|2|2	.	.	Xing|GR2009|1104685199098	4	9	16	MEI_RP	40	GENE|AC017076.2|ENSG00000234428			NA07000,NA10847,NA10851,NA11829,NA11831,NA11894,NA11920,NA12155,NA12287,NA12761,NA12828,NA18959,NA19093,NA19099
2	7846911	.	103	.	ALU	-	INS	P2_MEI_1494	226	RP	trio	NA	.	.	.|.|.	0|0|0	0|0|0	.	.	.	.	9	2	MEI_RP	21	.			NA19238
2	8534245	8534552	1	1	ALU	+	DEL	P1_M_061510_2_86&P2_M_061510_2_440	307	SR,RP	lowcov+trio	val	ASM	CEU+YRI	0.01|0.13|0.00	40|39|56	1|10|0	esv4909	.	.	19	.	.	bc_deletion,wtsi,washu,pindel_D,WASHU_RP,WTSI_RP,YALEU_SR,PINDEL_SR,UWASH_RP,BC_RP	.	.	AluYb8	CTGTAATCCCAGCACTTTGGGAGGCCGAGGCGGGTGGATCATGAGGTCAGGAGATCGAGACCATCCTGGCTAACAAGGTGAAACCCCGTCTCTACTAAAAATACAAAAAATTAGCCGGGCGCGGTGGCGGGCGCCTGTAGTCCCAGCTACTCGGGAGGCTGAGGCAGGAGAATGGCGTGAACCCGGGAAGCGGAGCTTGCAGTGAGCCGAGATTGCGCCACTGCAGTCCGCAGTCCGGCCTGGGCAACAGAGCGAGACTCCGTCTCAAAAAAAAAAAAAAAAAAAAAAA	NA06986,NA07000,NA07037,NA07051,NA07346,NA07347,NA07357,NA10847,NA10851,NA11829,NA11830,NA11831,NA11881,NA11894,NA11918,NA11919,NA11920,NA11931,NA11992,NA11993,NA11995,NA12003,NA12004,NA12005,NA12006,NA12043,NA12044,NA12045,NA12144,NA12154,NA12155,NA12156,NA12249,NA12287,NA12414,NA12489,NA12716,NA12717,NA12749,NA12750,NA12751,NA12761,NA12763,NA12776,NA12828,NA12891,NA12892,NA18486,NA18489,NA18498…
2	8773237	.	11	.	ALU	+	INS	P1_MEI_1457	294	RP	lowcov	NA	.	YRI	0.00|0.13|0.00	41|38|44	0|10|0	.	.	.	14	18	6	MEI_RP	40	.			NA18489,NA18508,NA18510,NA18519,NA18522,NA19102,NA19116,NA19257
2	9102875	.	10	.	L1	+	INS	P1_MEI_3406	.	SR	lowcov	NA	.	.	0.00|.|.	14|0|0	0|0|0	.	.	.	.	1	0	MEI_SR	4	.			NA19141,NA19141
2	9259761	9260092	56	44	ALU	+	DEL	P1_M_061510_2_87	331	RP	lowcov	NA	.	.	.|.|.	0|0|0	0|0|0	.	.	.	.	.	.	bc_deletion	.	.	AluYb8	GGCCGGGCGCGGTGGCTCACGCCTGTAATCCCAGCACTTTGGGAGGCCGAGGCGGGTGGATCACGAGGTCAGGAGATCGAGACCATCCTGGCTAACAAGGTGAAACCCCGTCTCTACTAAAAATACAAAAAATTAGCCGGGCGCGGTGGCGGCGCCTGTAGTCCCAGCTACTCGGGAGGCTGAGGCAGGAGAATGGCGTGAACCCGGGAAGCGGAGCTTGCAGTGAGCCGAGATTGCGCCACTGCAGTCCGCAGTCCGGCCTGGGCAACAGAGCGAGACTCCGTCTCAAAAAAAAAAAAAAAAAAAAAACAAATGAGTGTAGTTCCAACCTG	NA18858
2	9355474	.	70	.	ALU	+	INS	P2_MEI_1499	205	RP	trio	NA	.	.	.|.|.	0|0|0	0|0|0	.	.	.	.	2	3	MEI_RP	10	GENE|ASAP2|ENSG00000151693			NA12891
2	9806239	.	4	.	ALU	-	INS	P1_MEI_108&P2_MEI_496	307	RP|SR	lowcov+trio	NA	.	CEU+YRI+CHB+JPT	0.59|0.34|0.32	52|41|49	61|28|31	.	.	Xing|GR2009|1104685091647	18	146	161	MEI_SR,MEI_RP	80	.	AluYb8	TTTGTTTTTTTTTTTTTTTTTTTTGTTTAGTACGGAGTCTCGCTCTGTCGCCCAGGCCGGACTGCGAACTGCAGTGGCGCAATCTCGGCTCACTGCAAGCTCCGCTTCCCAGGTTCACGCCATTCTCCTGCCTCAGCCTCCCGAGTAGCTGGGACTACAGGCGCCCGCCACCGTGCCCGGCTAATTTTTTGTATTTTTAGTAGAGACGGGGTTTTACCTTGTTAGCCAGGATGGTCTCGATCTCCTGACCTCATGATCCACCCGCCTCGGCCTCCCAAAGTGCTGGGATTACAGGCCGTGAGCCACCGCGCCCGGCC	NA06986,NA07000,NA07037,NA07051,NA07346,NA07347,NA07357,NA10847,NA10851,NA11829,NA11831,NA11881,NA11894,NA11918,NA11919,NA11920,NA11931,NA11992,NA11993,NA11994,NA11995,NA12003,NA12004,NA12006,NA12043,NA12044,NA12045,NA12144,NA12154,NA12155,NA12156,NA12249,NA12414,NA12489,NA12716,NA12717,NA12749,NA12750,NA12751,NA12761,NA12763,NA12776,NA12872,NA12873,NA12874,NA12878,NA12892,NA18489,NA18498,NA18502…
2	9876672	9877022	1	1	ALU	-	DEL	P1_M_061510_2_90&P2_M_061510_2_451	350	SR,RP	lowcov+trio	val	ASM	YRI+CHB+JPT	.|0.45|0.36	0|40|38	0|36|27	esv4891	.	.	16	.	.	bc_deletion,pindel_D,wtsi,washu,UWASH_RP,WTSI_RP,WASHU_RP,BC_RP,PINDEL_SR	.	.	AluYb8	TGTTTTTTTTTTTGTTTTGTTTTGTTTTTTTTTTGTTTTTTTTTTTTTTGAGACGGAGTCTCGCTCTGTCGCCCAGGCCAGACTGCGGACTGCAGTGGCGCAATCTCGGCTCACTGCAAGCTCCGCTTCCCGGGTTCACGCCATTCTCCTGCCTCAGCCTCCCGAGTAGCTGGGACTACAGGCGCCCGCCACCGCGCCCGGCTAATTTTTTGTATTTTTAGTAGAGACGGGGTTTCACCTTGTTAGCCAGGATGGTCTCGATCTCCTGACCTCATGATCCACCCGCCTCGGCCTCCGAAAGTGCTGGGATTACAGGCGTGAGCCACCGCGCCCGG	NA06986,NA07000,NA07037,NA07051,NA07346,NA07347,NA07357,NA10847,NA10851,NA11829,NA11830,NA11894,NA11918,NA11919,NA11920,NA11992,NA11993,NA11994,NA11995,NA12004,NA12005,NA12006,NA12044,NA12144,NA12154,NA12155,NA12156,NA12249,NA12287,NA12717,NA12761,NA12763,NA12776,NA12892,NA18498,NA18499,NA18501,NA18502,NA18504,NA18505,NA18510,NA18511,NA18516,NA18517,NA18519,NA18520,NA18522,NA18526,NA18542,NA18545…
2	11271133	.	1	.	ALU	+	INS	P1_MEI_109&P2_MEI_425	302	RP|SR	lowcov+trio	val	PCR	CEU+YRI+CHB+JPT	0.32|0.17|0.39	54|45|51	35|15|40	.	.	Xing|GR2009|1104685092182	23	143	102	MEI_SR,MEI_RP	80	GENE|ROCK2|ENSG00000134318	AluYa5	GGCCGGGCGCGGTGGCTCACGCCTGTAATCCCAGCACTTTGGGAGGCCGAGGCGGGCGGATCACGAGGTCAGGAGATCGAGACCATCCTGGCTAAAACGGTGAAACCCCCGTCTCTACTAAAAATACAAAAAATTAGCCGGGCGTAGTGGCGGGCGCCTGTAGTCCCAGCTACTTGGGAGGCTGAGGCAGGAGAATGGCGTGAACCCGGGAGGCGGAGCTTGCAGTGAGCCGAGATCCCGCCACTGCACTCCAGCCTGGGCGACAGAGCGAGACTCCGTCTCAAAAAAAAAAAAAAAAAAA	NA06986,NA07000,NA07346,NA07347,NA07357,NA10851,NA11829,NA11840,NA11881,NA11894,NA11994,NA11995,NA12003,NA12006,NA12043,NA12044,NA12045,NA12144,NA12154,NA12155,NA12156,NA12234,NA12287,NA12414,NA12717,NA12749,NA12751,NA12761,NA12763,NA12776,NA12812,NA12814,NA12815,NA12874,NA12878,NA12891,NA18498,NA18501,NA18502,NA18505,NA18508,NA18517,NA18526,NA18537,NA18545,NA18547,NA18550,NA18555,NA18558,NA18561…
2	11343811	.	1	.	ALU	-	INS	P1_MEI_3407&P2_MEI_2259	293	SR	lowcov+trio	NA	.	CEU	0.92|.|.	12|0|0	22|0|0	.	.	Xing|GR2009|1104685092216	14	30	4	MEI_SR	60	GENE|ROCK2|ENSG00000134318	AluYa5	TTTTTTTTTTTTTTTTTTTTTTTTTTTTTGTTAGACGGAGTCTCGCTCTGTCGCCCAGGCTGGAGTGCAGTGGCGGGATCTCGGCTCACTGCAAGCTCCGCCTCCCGGGTTCATGCCATTCTCCTGCCTCAGCCTCCCAAGTAGCTGGGACTACAGGCGCCCGCCACTACGCCCGGCTAATTTTTTGTATTTTTAGTTAGAGACGGGGTTTCACCGTTTTAGCTGGGATGGTCTCGATCTCCTGACCTCGTGATCCGCCCGCCCTCGGCCCTCCCAAAGTGCTGGGATTACAGGCGTGAGCCACCGCGCCCGGCC	NA07346,NA07347,NA11894,NA11931,NA12043,NA12234,NA12287,NA12812,NA12814,NA12815,NA12872,NA12874,NA12878,NA18969,NA19141,NA19143
2	11796120	.	13	.	ALU	+	INS	P1_MEI_1458	247	RP	lowcov	NA	.	YRI	0.00|0.05|0.00	39|40|48	0|4|0	.	.	.	8	10	3	MEI_RP	25	GENE|LPIN1|ENSG00000134324			NA18502,NA18916,NA19108
2	12994023	.	5	.	ALU	+	INS	P1_MEI_110&P2_MEI_1433	199	RP|SR	lowcov+trio	NA	.	CEU+CHB+JPT	0.06|.|0.45	51|0|50	6|0|45	.	.	.	13	81	30	MEI_SR,MEI_RP	80	.			NA10847,NA12045,NA12144,NA12414,NA12878,NA12891,NA18519,NA18526,NA18532,NA18537,NA18542,NA18545,NA18547,NA18552,NA18558,NA18562,NA18563,NA18564,NA18570,NA18571,NA18572,NA18573,NA18576,NA18577,NA18582,NA18592,NA18603,NA18608,NA18856,NA18916,NA18942,NA18943,NA18944,NA18951,NA18952,NA18953,NA18956,NA18959,NA18965,NA18970,NA18973,NA19005,NA19099
2	13538167	.	4	.	ALU	-	INS	P1_MEI_111&P2_MEI_432	233	RP|SR	lowcov+trio	NA	.	YRI	0.00|0.16|0.00	53|40|40	0|13|0	.	.	.	12	10	22	MEI_SR,MEI_RP	80	.			NA18502,NA18517,NA18861,NA18907,NA18912,NA18916,NA19093,NA19138,NA19143,NA19238,NA19239,NA19240
2	14938772	.	10	.	ALU	+	INS	P2_MEI_2270	.	SR	trio	NA	.	.	.|.|.	0|0|0	0|0|0	.	.	.	.	0	1	MEI_SR	4	.			NA12878
2	15081202	.	1	.	ALU	+	INS	P1_MEI_112&P2_MEI_440	302	RP|SR	lowcov+trio	NA	.	CEU+YRI+CHB+JPT	0.32|0.25|0.21	51|38|48	33|19|20	.	.	.	14	99	59	MEI_SR,MEI_RP	80	.	AluYb9	GGCCGGGCGCGGTGGCTCACGCCTGTAATCCCAGCACTTTGGGAGGCCGAGGCGGGTGGATCATGAGGTCAGGAGATCGAGACCATCCTGGCTAACAAGGTGAAACCCCGTCTCTACTAAAAATACAAAAAATTAGCCGGGCGCGGTGGCGGGCGCCTGTAGTCCCAGCTACTGGGGAGAACTAAGAAGGCAGGAGAATGGCGTTGAACCCGGGAAGCGGAGCTTGCAGTGAGCCGAGATTGCGCCACTGCAGTCCGCAGTCCAGCCTGGGCGACAGAGCGAGACTCCGTCTCAAAAAAAAAAAAATAAAAAAAAAAAAAAAA	NA07000,NA07051,NA07346,NA07347,NA11894,NA11918,NA11931,NA11993,NA11994,NA11995,NA12003,NA12004,NA12045,NA12144,NA12154,NA12155,NA12156,NA12249,NA12414,NA12716,NA12717,NA12750,NA12812,NA12872,NA12874,NA12878,NA12892,NA18501,NA18504,NA18505,NA18508,NA18516,NA18523,NA18542,NA18561,NA18562,NA18563,NA18564,NA18566,NA18570,NA18572,NA18573,NA18593,NA18608,NA18638,NA18858,NA18861,NA18907,NA18940,NA18947…
2	15083720	15084102	93	50	ALU	+	DEL	P1_M_061510_2_1093&P2_M_061510_2_746	382	RP	lowcov+trio	NA	.	CEU+YRI+CHB+JPT	0.53|0.37|0.42	20|27|6	21|20|5	esv3255	.	.	.	.	.	wtsi,WTSI_RP	.	.	AluYb9	GGATGTTGAATTTTATTAAAAGTCTTTTCTGGCCGGGCACGGTGGCTCACGCCTGTAATCCCAGCACTTTGGGAGGCCGAGGCGGGTGGATCATGAGGTCAGGAGATCGAGACCATCCTGGCTAACAAGGTGAAACCCCGTCTCTACTAAAAATACAAAAAATTAGCCGGGCGCGGTGGCGGGCGCCTGTAGTCCCAGCTACTGGGGAGGCTGAGGCAGGAGAATGGCGTGAACCCGGGAAGCGGAGCTTGCAGTGAGCCGAGATTGCGCCACTGCAGTCCGCAGTCCGGCCTGGGCGACAGAGCGAGACTCCGTCTCAAAAAAAAAAAAAAAAAAAAAAAAAAAAAGTCTTTTCTGCATCTATTGAGATAATCATGTGGTTT	NA07037,NA07051,NA07346,NA11918,NA11992,NA12003,NA12043,NA12154,NA12155,NA12249,NA12716,NA12878,NA18499,NA18510,NA18516,NA18520,NA18522,NA18542,NA18552,NA18592,NA18593,NA18638,NA18907,NA18912,NA18953,NA18961,NA18964,NA19102,NA19137,NA19172,NA19240,NA19238,NA19239,NA19240
2	15436978	.	1	.	ALU	+	INS	P1_MEI_113&P2_MEI_443	304	RP|SR	lowcov+trio	val	PCR	CEU+YRI+CHB+JPT	0.44|0.50|0.32	52|42|47	46|42|30	.	.	Xing|GR2009|1104685093183	25	158	145	MEI_SR,MEI_RP	80	GENE|NBAS|ENSG00000151779	AluY	GGCCGGGCGGCGGTGGCTCACGCCTGTAATCCCAGCACTTTGGGGAGGCCGAGGGCGGGCGGATCACGAGGTCAGGAGATCGAGACCATCCTGGCTAACACGGTGAAACCCCGTCTCTACTAAAAAATACAAAAAATTAGCCGGGCGTGGTAGCGGGGCGCCTGTAGTCCCAGCTACTCGGGAGGCTGAGGCAGGAGAATGGGCGTGAACCCGGGAGGCGGAGGCTTGCAGGGAGCCGAGATCGCGCCACTGCACTCCAGCCTGGGCGACAGAGCGAGACTCCGTCTCAAAAAAAAAAAAAAAAAAGAGAA	NA06986,NA07000,NA07037,NA07051,NA07346,NA07347,NA07357,NA10851,NA11829,NA11830,NA11840,NA11881,NA11918,NA11919,NA11920,NA11931,NA11992,NA11993,NA12004,NA12043,NA12044,NA12045,NA12144,NA12154,NA12155,NA12156,NA12249,NA12287,NA12489,NA12717,NA12750,NA12751,NA12761,NA12763,NA12776,NA12814,NA12815,NA12828,NA12872,NA12873,NA12874,NA12878,NA12891,NA12892,NA18486,NA18489,NA18501,NA18502,NA18504,NA18508…
2	16168556	16168882	1	1	ALU	-	DEL	P2_M_061510_2_193	325	RP,SR	trio	val	ASM	YRI	.|0.29|.	0|28|0	0|16|0	esv5766	.	.	.	.	.	YALEU_SR,BC_RP,UWASH_RP,WTSI_RP,WASHU_RP	.	.	AluYa5	CAGATTTTTCACTTTTTTTTTTTTTTTTTTTTTTTTTTTTTGAGACGGAGTCTCGCTCTGTCGCCCAGGCTGGAGTGCAGTGGCGGGATCTCGGCTCACTGCAAGCTCCGCCTCCCGGGTTCACGCCATTCTCCTGCCTCAGCCTCCCAAGTAGCTGGGACTACAGGCGCCCGCCACTACGCCCGGCTAATTTTTTTTTGTATTTTTAGTAGAGACGGGGTTTCACCGTTTTAGCCGGGATGGTCTCGATCTCCTGACCTCGTGATCCGCCCGCCTCGGCCTCCCAAAGTGCTGGGATTACAGGCGTGAGCCACCGCGCCCGGCCCA	NA12878,NA12892,NA19238,NA19239,NA19240
2	16802843	.	58	.	ALU	+	INS	P1_MEI_1459	162	RP	lowcov	NA	.	YRI	0.00|0.03|0.00	40|39|47	0|2|0	.	.	.	.	4	3	MEI_RP	14	GENE|AC008069.1|ENSG00000223536			NA18489,NA19138
2	18169883	.	5	.	ALU	+	INS	P1_MEI_114	295	SR|RP	lowcov	NA	.	.	0.00|.|0.00	51|0|44	0|0|0	.	.	.	14	11	7	MEI_SR,MEI_RP	40	GENE|KCNS3|ENSG00000170745			NA07347,NA12815,NA18489,NA18499,NA18507,NA18871,NA19093,NA19099,NA19108,NA19114
2	18437711	18438005	1	1	ALU	-	DEL	P1_M_061510_2_544&P2_M_061510_2_729	294	SR,RP	lowcov+trio	val	ASM	CEU+YRI+CHB+JPT	0.70|0.69|0.64	41|39|50	57|54|64	.	.	.	13	.	.	wtsi,washu,pindel_D,broad,WTSI_RP	.	.	AluY	TTTTTTTTTTTTTTTTTTGAGACGGAGTCTCGCTCTGTCGCCCAGGCTGGAGTGCAGTGGCGCGATCTCGGCTCACTGCAAGCTCCGCCTCCCGGGTTCACGCCATTCTCCTGCCTCAGCCTCCCGAGTAGCTGGGACTACAGGCCCCCATTTTTTGTATTTTTAGTAGAGACGGGGTTTCACTGTGTTACCCAGGATGGTCTCGATCTCCTGACCTCGTGATCCGCCCGCCTCGGCCTCCCAAAGTGCTGGGATTACAGGCGTGAGCCACCGCGCCCGGCC	NA06986,NA06994,NA07037,NA07347,NA07357,NA11829,NA11881,NA11918,NA11992,NA11993,NA12003,NA12045,NA12489,NA12716,NA12749,NA12761,NA12763,NA12828,NA12878,NA12891,NA12892,NA18486,NA18489,NA18499,NA18501,NA18502,NA18505,NA18507,NA18508,NA18517,NA18522,NA18523,NA18526,NA18537,NA18542,NA18545,NA18547,NA18550,NA18552,NA18561,NA18562,NA18563,NA18570,NA18576,NA18577,NA18579,NA18603,NA18638,NA18856,NA18858…
2	19611882	.	6	.	ALU	+	INS	P1_MEI_115&P2_MEI_1453	241	RP|SR	lowcov+trio	NA	.	CEU	0.08|.|.	39|0|0	6|0|0	.	.	.	15	42	38	MEI_SR,MEI_RP	6	.			NA07346,NA12003,NA12717,NA12749,NA12776,NA18489,NA18498,NA18499,NA18501,NA18502,NA18516,NA18523,NA18526,NA18537,NA18550,NA18552,NA18555,NA18558,NA18561,NA18563,NA18571,NA18573,NA18577,NA18579,NA18593,NA18605,NA18609,NA18638,NA18856,NA18858,NA18861,NA18907,NA18909,NA18940,NA18945,NA18947,NA18948,NA18951,NA18952,NA18961,NA18970,NA18973,NA18980,NA19093,NA19114,NA19138,NA19239,NA19257
2	19940317	.	10	.	L1	-	INS	P1_MEI_3408	711	SR	lowcov	val	PCR	CEU	0.17|.|.	9|0|0	3|0|0	.	.	.	.	0	2	MEI_SR	5	EXON|AC013400.1|ENSG00000228784			NA12814,NA12873
2	19948717	.	6	.	ALU	+	INS	P1_MEI_1460&P2_MEI_1454	299	RP	lowcov+trio	NA	.	YRI	0.00|0.26|0.00	45|44|47	0|23|0	.	.	.	13	30	18	MEI_RP	80	.			NA18499,NA18508,NA18510,NA18511,NA18516,NA18519,NA18853,NA18858,NA18871,NA18907,NA18909,NA19093,NA19099,NA19102,NA19108,NA19129,NA19137,NA19147,NA19210,NA19238,NA19239
2	20040907	.	7	.	ALU	-	INS	P2_MEI_1455	289	RP	trio	NA	.	.	.|.|.	0|0|0	0|0|0	.	.	.	13	51	51	MEI_RP	40	GENE|WDR35|ENSG00000118965			NA19239,NA19240
2	20530146	20530453	1	1	ALU	+	DEL	P1_M_061510_2_109&P2_M_061510_2_263	307	SR,RP	lowcov+trio	val	PCR,ASM	CEU+YRI+CHB+JPT	0.41|0.03|0.04	43|50|55	35|3|4	esv5131	.	.	13	.	.	washu,broad,wtsi,pindel_D,bc_deletion,YALEU_SR,WASHU_RP,UWASH_RP,BC_RP,PINDEL_SR,WTSI_RP	.	.	AluYa5	GGGCCGGGCGCGGTGGCTCACGCCTGTAATCCCAGCACTTTGGGAGGCCGAGGCGGGCGGATCACGAGGTCAGGAGATCGAGACCATCCCGGCTAAAACGGTGAAACCCCGTCTCTACTAAAAATACAAAAAATTAGCCGGGCGTAGTGGCGGGCGCCTGTAGTCCCAGCTACTCGGGAGGCTGAGGCAGGAGAATGGCGTGAACCCGGGAGGCGGAGCTTGCAGTGAGCCGAGATCCCGCCACTGCACTCCAGCCTGGGCGACAGAGCGAGACTCCATCTCAAAAAAAAAAAAA	NA06986,NA06994,NA07000,NA07051,NA07346,NA07347,NA07357,NA10847,NA10851,NA11829,NA11830,NA11831,NA11881,NA11918,NA11919,NA11920,NA11931,NA11992,NA11993,NA11994,NA11995,NA12003,NA12004,NA12005,NA12006,NA12043,NA12044,NA12045,NA12144,NA12154,NA12155,NA12156,NA12287,NA12414,NA12489,NA12717,NA12749,NA12761,NA12763,NA12776,NA12813,NA12828,NA12891,NA18486,NA18489,NA18498,NA18499,NA18501,NA18502,NA18504…
2	20702412	.	10	.	L1	+	INS	P2_MEI_2275	.	SR	trio	NA	.	.	.|.|.	0|0|0	0|0|0	.	.	.	.	0	1	MEI_SR	4	GENE|HS1BP3|ENSG00000118960			NA12878
2	21234670	.	1	.	ALU	+	INS	P1_MEI_116&P2_MEI_461	302	RP|SR	lowcov+trio	NA	.	CEU+YRI+CHB+JPT	0.31|0.01|0.51	53|38|46	33|1|47	.	.	.	14	85	70	MEI_SR,MEI_RP	80	.	AluYb8	GGCCGGGCGCGGTGGCTCACGCCTGTAATCCCAGCACTTTGGGAGGCCGAGGCGGGTGGATCACGAGGTCAGGAGATCGAGACCATCCTGGCTAACAAGGTGAAACCCCGTCTCTACTAAAAATACAAAAAATTAGCCGGGTGCGGTGGCGGGCGCCTGTAGTCCCAGCTACTCGGGAGGCTAGAAAGGCAGGAGAATGGCGTGAACCCAGGAAGCGGAGCTTGCAGTGAGCCGAGATTGCGCCATTGCAGTCCGCAGTCCGGCCTGGGCAACAGAGCGAGACTCCGTCTACAAAAAAAAAAAAAAAAAA	NA06986,NA07000,NA07037,NA07051,NA07357,NA10847,NA11830,NA11831,NA11881,NA11918,NA11931,NA11993,NA11995,NA12003,NA12045,NA12154,NA12234,NA12249,NA12287,NA12414,NA12716,NA12717,NA12749,NA12750,NA12751,NA12763,NA12776,NA12878,NA12891,NA18526,NA18532,NA18537,NA18545,NA18550,NA18552,NA18555,NA18558,NA18561,NA18562,NA18563,NA18566,NA18570,NA18571,NA18572,NA18573,NA18576,NA18577,NA18579,NA18582,NA18592…
2	21388623	.	13	.	ALU	+	INS	P1_MEI_1461	303	RP	lowcov	val	PCR	CEU+YRI+CHB+JPT	0.01|0.03|0.09	44|39|46	1|2|8	.	.	.	15	12	10	MEI_RP	40	GENE|AC068490.1|ENSG00000233005			NA07357,NA18519,NA18526,NA18570,NA18592,NA18605,NA18609,NA18951,NA18964
2	21426283	21426588	1	1	ALU	+	DEL	P1_M_061510_2_110&P2_M_061510_2_277	305	RP,SR	lowcov+trio	val	ASM	CEU+YRI+CHB+JPT	1.00|0.51|0.96	44|37|57	88|38|110	.	.	.	15	.	.	pindel_D,bc_deletion,wtsi,broad,washu,BC_RP,UWASH_RP	.	GENE|AC068490.1|ENSG00000233005	AluY	AGCCTGTAATCCCAGCACTTTGGGAGGCCGAGGCGGGCGGATCACGAGGTCAGGAGATCGAGACCATCCTGGCTAACACGGTGAAACCCCGTCTCTACTAAAAATACAAAAAATTAGCCGGGCGTGGTAGCGGGCGCCTGTAGTCCCAGCTACTCGGGAGGCTGAGGCAGGAGAATGGCGTGAACCCGGGAGGCGGAGCTTGCAGTGAGCCGAGATCGCGCCACGGCACTCCAGCCTGGGCGACAGAGCGAGACTCCGTCTCAAAAAAAAAAAAAAAAAAAAAAAAAAAAA	NA06994,NA07000,NA07347,NA11881,NA11894,NA11918,NA11920,NA12045,NA12154,NA12156,NA12761,NA12813,NA12828,NA12891,NA12892,NA18489,NA18501,NA18502,NA18504,NA18510,NA18511,NA18517,NA18520,NA18522,NA18523,NA18537,NA18605,NA18853,NA18856,NA18861,NA18870,NA18871,NA18909,NA18912,NA18916,NA18942,NA18951,NA18953,NA18960,NA18967,NA18971,NA18972,NA18973,NA18974,NA18975,NA18976,NA18981,NA19098,NA19099,NA19102…
2	21630208	.	34	.	ALU	-	INS	P1_MEI_1462	36	RP	lowcov	NA	.	YRI	0.00|0.05|0.00	43|41|49	0|4|0	.	.	.	.	2	6	MEI_RP	16	GENE|AC068490.1|ENSG00000233005			NA18499,NA18507,NA18517,NA19102
2	21650315	.	1	.	ALU	+	INS	P1_MEI_117&P2_MEI_464	285	RP|SR	lowcov+trio	val	PCR	CEU+YRI+CHB+JPT	0.75|0.83|0.75	53|43|50	79|71|75	.	.	Xing|GR2009|1104685452461	16	355	322	MEI_SR,MEI_RP	80	GENE|AC068490.1|ENSG00000233005	AluYd8	CCGGGCGCGGTGGCGTCACGCCTGTAATCCCAGCACTTTGGGGAGGCCGAGGGCGGGCGGATCACGAGGTCAGGACGATCGAGACCACGGTCGAAACCCCCGTCTCTAACTAAAAAATACAAAAAAATTAGCCCGGGCGGCAGTGGCGGGCGCCGTGTAGTCCCAGCTACTCGGGAGGCTAGAGGCAGGAGAATGGCGGTGAACCCGGAAGGCGGAGCTTGCAGTGAGCGGAGATCGCGGCCACAGCACTCCCGCCTGGGCGGACAGAACGAGACTCCGTCTCAAAAAAAAAAAAAAAAGAA	NA06986,NA07000,NA07037,NA07051,NA07346,NA07347,NA07357,NA10847,NA10851,NA11829,NA11830,NA11831,NA11840,NA11881,NA11894,NA11918,NA11919,NA11920,NA11931,NA11992,NA11993,NA11994,NA11995,NA12003,NA12004,NA12006,NA12043,NA12044,NA12045,NA12144,NA12154,NA12155,NA12156,NA12234,NA12249,NA12287,NA12414,NA12489,NA12716,NA12717,NA12749,NA12750,NA12751,NA12761,NA12776,NA12812,NA12814,NA12815,NA12828,NA12873…
2	21665796	.	63	.	ALU	+	INS	P2_MEI_1464	289	RP	trio	NA	.	.	.|.|.	0|0|0	0|0|0	.	.	.	.	19	13	MEI_RP	40	GENE|AC068490.1|ENSG00000233005			NA19239
2	22559822	.	1	.	L1	?	INS	P1_MEI_1463&P2_MEI_471	984	RP|SR	lowcov+trio	NA	.	CEU+YRI	0.02|0.12|0.00	46|43|49	2|10|0	.	.	.	11	34	10	MEI_SR,MEI_RP	80	GENE|AC068490.2|ENSG00000231200			NA10851,NA12878,NA12891,NA18517,NA18853,NA18861,NA18907,NA19099,NA19108,NA19114,NA19116,NA19138
2	22794084	.	10	.	ALU	+	INS	P1_MEI_3409	.	SR	lowcov	NA	.	.	0.00|.|.	14|0|0	0|0|0	.	.	.	.	0	1	MEI_SR	4	.			NA18970
2	23044504	.	1	.	L1	-	INS	P1_MEI_118&P2_MEI_472	6042	RP|SR	lowcov+trio	NA	.	CEU+CHB+JPT	0.46|.|0.93	35|0|27	32|0|50	.	.	Beck|CELL2010|ABC12_66	16	66	31	MEI_SR,MEI_RP	80	.			NA06986,NA07000,NA07051,NA07346,NA10847,NA11830,NA11831,NA11881,NA11894,NA11919,NA11920,NA11995,NA12003,NA12004,NA12043,NA12044,NA12249,NA12717,NA12750,NA12751,NA12812,NA12814,NA12872,NA12874,NA12878,NA12892,NA18501,NA18502,NA18504,NA18510,NA18516,NA18532,NA18537,NA18542,NA18550,NA18552,NA18555,NA18558,NA18561,NA18562,NA18563,NA18564,NA18566,NA18571,NA18576,NA18577,NA18579,NA18582,NA18593,NA18605…
2	25081124	25081439	1	1	ALU	+	DEL	P1_M_061510_2_905&P2_M_061510_2_576	315	SR,RP	lowcov+trio	val	ASM	CEU+YRI+CHB+JPT	0.13|0.12|0.26	35|39|43	9|9|22	esv8717	.	.	9	.	.	wtsi,pindel_D,washu,UWASH_RP,PINDEL_SR,YALEU_SR,WASHU_RP	.	GENE|AC013267.3|ENSG00000224165	AluYb8	GGGCCGGGCGCGGTGGCTCACGCCTGTAATCCCAGCACTTTGGGAGGCCGAGGCGGGTGGATCATGAGGTCAGGAGATCGAGACCATCCTGGCTAACAAGGTGAAACCCCGTCTCTACTAAAAATACAAAAAAATTAGCCGGGCGCGGTGGCGGGCGCCTGTAGTCCCAGCTACTCGGGAGGCTGAGGCAGGAGAATGGCGTGAACCCAGGAAGCGGAGCTTGCAGTGAGCCGAGATTGCGCCACTGCAGTCCGCAGTCTGGCCTGGGCGACAGAGCGAGACTCCGTCTCAAAAAAAAAAAAAAAAA	NA06986,NA07000,NA07037,NA07051,NA07346,NA07347,NA07357,NA10847,NA11829,NA11831,NA11894,NA11918,NA11919,NA11920,NA11992,NA11994,NA12003,NA12006,NA12043,NA12045,NA12154,NA12155,NA12249,NA12716,NA12750,NA12751,NA12763,NA12828,NA12878,NA12891,NA18498,NA18501,NA18502,NA18504,NA18505,NA18508,NA18510,NA18519,NA18522,NA18526,NA18537,NA18545,NA18547,NA18550,NA18552,NA18555,NA18564,NA18572,NA18576,NA18577…
2	26327439	.	1	.	ALU	-	INS	P1_MEI_3410&P2_MEI_2281	298	SR	lowcov+trio	NA	.	CEU	0.04|.|.	13|0|0	1|0|0	.	.	Xing|GR2009|1104685453731	10	3	4	MEI_SR	35	GENE|HADHB|ENSG00000138029	AluYb8	TTTCTTTTTTTTTTTTTTNTTTTTTTTTTTGTAGACGGAGTCTCGCTCTGTCGCCCAGGCCGGACTGCGGACTGCAGTGGCGCAATCTCGGCTCACTGCAAGCTCCGCTTCCCGGGTTCACGCCATTCTCCTGCCTCAGCCTCCCGAGTAGCTGGGACTACAGGCGCCCGCCACCGCGCCCGGCTAATTTTTTGTATTTTTTTTTTAGTAGAGACGGGGTTTCACCTTGTTAGCCAGGATGGTCTCGATCTCCTGACCTCATGATCCACCCGCCTCGGCCTCCCAAAGTGCTGGGATTACAGGCGTGAGCCACCGCGCCCGGCC	NA12873,NA12878
2	26477172	.	1	.	ALU	-	INS	P1_MEI_3411&P2_MEI_2282	302	SR	lowcov+trio	NA	.	CEU	0.64|.|.	11|0|0	14|0|0	.	.	Xing|GR2009|1104685453789	14	13	3	MEI_SR	53	.	AluYb8	TTTTTTTTTTTTTTTTTTTGTAGACGGAGTCTCGCTCTGTCGCCCAGGCCGGACTGCGGACTGCAGTGGCGCAATCTCGGCTCACTGCAAGCTCCGCTTCCCGGGTTCACGCCATTCATTCTCCTGCCTCAGCCTCCCGAGTAGCTGGGACTACAGGCGCCCGCCACTGCGCCCGGCTAATTTTTTTGTATTTTTAGTAGTAAGACGGGGTTTCACCTTGTTAGCCAGGGATGGTCTCGATCTCCTGACCTCATGATCCACCCGCCTCGGCCTCCCAAAGTGCTGGGATTACAGGCGTGAGCCACCGCGCCCGGCC	NA07346,NA11881,NA11894,NA11931,NA12045,NA12812,NA12872,NA12874,NA12878
2	27515987	.	10	.	ALU	-	INS	P1_MEI_3412	.	SR	lowcov	NA	.	.	0.00|.|.	11|0|0	0|0|0	.	.	.	.	3	0	MEI_SR	7	GENE|NRBP1|ENSG00000115216			NA19143
2	27907582	.	1	.	ALU	-	INS	P1_MEI_119&P2_MEI_475	287	RP|SR	lowcov+trio	NA	.	CEU+YRI	0.03|0.11|0.00	53|42|49	3|9|0	.	.	.	8	13	12	MEI_SR,MEI_RP	80	GENE|MRPL33|ENSG00000243147	AluYa5	TTTATTTTTTTTTATTTTATTTTTTTTTTGTAGACGGAGTCTCGCTCTGTCGCCCAGGCTGGAGTGCAGTGGCGGGATCTCGGCTCACTGCAAGCTCCGCCTCCCGGGTTCACGCCATTCTCCTGCCTCAGCCTCCCAAGTAGCTGGGACTACAGGCGCCCGCCACTACGCCCGGCTAATTTTTTTGTATTTTTAGTAGAGACGGGGTTTCACCGTTTTAGCCGGGATGGTCTCGATCTCTTGACCTCGTGATCCGCCCGCCTCGGCCTCCCAAAGTGCTGGGATTACAGGCGTGAGCCACCGCGCCCGGCC	NA12287,NA12878,NA12891,NA18510,NA18523,NA18861,NA18870,NA18912,NA19143,NA19147,NA19238,NA19239,NA19240
2	27986690	.	27	.	ALU	+	INS	P1_MEI_1464	62	RP	lowcov	NA	.	YRI	0.00|0.05|0.00	42|40|48	0|4|0	.	.	.	19	6	3	MEI_RP	18	GENE|MRPL33|ENSG00000243147			NA18499,NA18502,NA18516,NA19138
2	28207424	28207751	1	1	ALU	-	DEL	P1_M_061510_2_116&P2_M_061510_2_342	327	SR,RP	lowcov+trio	val	ASM	CEU+YRI+CHB+JPT	0.12|0.35|0.62	28|44|52	7|31|64	.	.	.	7	.	.	broad,wtsi,washu,pindel_D,bc_deletion,BC_RP,WTSI_RP	.	GENE|BRE|ENSG00000158019	AluYa5	TATTATTATTATTATTATTATTTTTTTTTTTTTTTTTTTTGAGACGGAGTCTCGCTCTGTCGCCCAGGCTGGAGTGCAGTGGCGCAATCTCGGCTCACTGCAAGCTCCGCCTCCCGGGTTCACGCCATTCTCCTGCCTCAGCCTCCCAAGTAGCTGGGACTACAGGCGCCCGCCACTACGCCCGGCTAATTTTTTGTATTTTTAGTAGAGACGGGGTTTCACCGTTTTAGCCGGGATGGTCTCGATCTCCTGACCTCGTGATCCGCCCGCCTCGGCCTCCCAAAGTGCTGGGATTACAGGCGTGAGCCACCGCGCCCGGCC	NA06986,NA06994,NA07000,NA07037,NA07051,NA07346,NA07347,NA07357,NA10847,NA10851,NA11829,NA11830,NA11831,NA11881,NA11894,NA11918,NA11919,NA11920,NA11931,NA11992,NA11993,NA11994,NA11995,NA12003,NA12004,NA12005,NA12006,NA12043,NA12044,NA12045,NA12144,NA12154,NA12155,NA12156,NA12249,NA12287,NA12414,NA12489,NA12716,NA12717,NA12749,NA12750,NA12751,NA12761,NA12763,NA12776,NA12813,NA12828,NA12878,NA12891…
2	29498657	.	10	.	L1	-	INS	P1_MEI_120	6024	SR|RP	lowcov	NA	.	YRI+CHB+JPT	0.00|0.06|0.01	48|39|40	0|5|1	.	.	.	.	4	11	MEI_SR,MEI_RP	40	GENE|ALK|ENSG00000171094			NA18486,NA18501,NA18561,NA18871,NA19093,NA19143
2	29659918	.	4	.	ALU	-	INS	P1_MEI_3413&P2_MEI_2283	291	SR	lowcov+trio	NA	.	CEU	0.17|.|.	15|0|0	5|0|0	.	.	.	12	13	1	MEI_SR	48	GENE|ALK|ENSG00000171094	AluY	TTTTTTTTNTTTTTTTTTTTTGTAGACGGAGTCTCGCTCTGTCGCCCAGGCTGGAGTGCAGTGGCGCGATCTCGGCTCACTGCAAGCTCCGCCTCCCGGGTTCACGCCATTCTCCTGCCTCAGCCTCCCGAGTAGCTGGGACTACAGGCGCCCGCTACCACGCCCGGCTAATTTTTTGTATTTTTAGTAGAGACGGGGTTTCACCGTGTTAGCCAGGATGGTCTCGATCTCCTGACCTCGTGATCCGCCCGCCTCGGCCTCCCAAAGTGCTGGGATTACAGGCGTGAGCCACCGCGCCCGGCC	NA11840,NA11918,NA12234,NA12873,NA12878,NA19240
2	29990276	.	16	.	ALU	+	INS	P1_MEI_1465	309	RP	lowcov	NA	.	YRI	0.00|0.05|0.00	44|39|45	0|4|0	.	.	.	21	13	4	MEI_RP	34	GENE|ALK|ENSG00000171094			NA18519,NA18861,NA18871,NA18909
2	30523479	.	5	.	ALU	+	INS	P1_MEI_121	296	SR|RP	lowcov	NA	.	YRI	.|0.14|.	0|38|0	0|11|0	.	.	Iskow|CELL2010|FSTNXB304H5PJQ	17	59	16	MEI_SR,MEI_RP	40	.			NA07346,NA07357,NA11894,NA11931,NA12006,NA12043,NA12489,NA12761,NA12812,NA12873,NA18489,NA18502,NA18505,NA18519,NA18532,NA18545,NA18561,NA18563,NA18566,NA18571,NA18573,NA18576,NA18592,NA18593,NA18605,NA18609,NA18856,NA18871,NA18943,NA18960,NA18961,NA19102,NA19114,NA19138
2	30911950	.	45	.	ALU	-	INS	P1_MEI_1466	273	RP	lowcov	NA	.	CHB+JPT	0.00|0.00|0.12	43|39|47	0|0|11	.	.	.	.	8	10	MEI_RP	36	.			NA18552,NA18558,NA18561,NA18579,NA18605,NA18945,NA18947,NA18952,NA18956
2	30963416	.	10	.	ALU	+	INS	P1_MEI_3414	173	SR	lowcov	NA	.	CEU	0.04|.|.	14|0|0	1|0|0	.	.	.	.	1	0	MEI_SR	4	.			NA11931
2	31196229	31196544	1	1	ALU	+	DEL	P1_M_061510_2_119	315	SR,RP	lowcov	val	ASM	CEU+YRI+CHB+JPT	0.69|0.81|0.86	44|50|55	61|81|95	esv3567	.	.	16	.	.	bc_deletion,pindel_D,broad,washu,wtsi	.	GENE|GALNT14|ENSG00000158089	AluY	GGCCGGGCGCGGTGGCTCACGCCTGTAATCCCAGCACTTTGGGAGGCCGAGGCGGGCGGATCACGAGGTCAGGAGATCGAGACCATCCTGGCTAACAAGGTGAAACCCCGTCTCTACTAAAAATACAAAAAATTAGCCGGGCGTGGTAGCGGGCGCCTGTAGTCCCAGCTACTCGGGAGGCTGAGGCAGGAGAATGGCGTGAACCCGGGAGGCGGAGCTTGCAGTGAGCCGAGATCGCGCCACTGCACTCCAGCCTGGGCGACAGAGCGAGACTCCGTCTCAAAAAAAAAAAAAAAAAAA	NA06994,NA10847,NA11829,NA11830,NA11881,NA11894,NA11918,NA11919,NA11931,NA11992,NA11994,NA11995,NA12006,NA12044,NA12144,NA12155,NA12156,NA12249,NA12287,NA12414,NA12716,NA12717,NA12749,NA12750,NA12763,NA12813,NA12892,NA18486,NA18489,NA18498,NA18505,NA18516,NA18517,NA18542,NA18564,NA18571,NA18573,NA18577,NA18582,NA18858,NA18861,NA18943,NA18944,NA18948,NA18949,NA18951,NA18952,NA18959,NA18961,NA18964…
2	31380960	.	10	.	ALU	+	INS	P1_MEI_1467&P2_MEI_1475	229	RP	lowcov+trio	val	PCR	CEU	0.12|0.00|0.00	46|38|42	11|0|0	.	.	.	19	11	8	MEI_RP	78	.			NA10847,NA10851,NA11830,NA11918,NA11994,NA12043,NA12414,NA12776,NA12878,NA12892
2	31413184	.	4	.	ALU	+	INS	P1_MEI_122&P2_MEI_476	233	RP|SR	lowcov+trio	val	PCR	CEU+YRI+CHB+JPT	0.69|0.80|0.87	48|45|49	66|72|85	.	.	Xing|GR2009|1104685768789	16	252	231	MEI_SR,MEI_RP	80	GENE|XDH|ENSG00000158125	AluYa5	GGCCGGGCGCGGTGGCTCACGCCTGTAATCCCAGCACTTTGGGAGGCCGAGGGCGGGCGGATCACGAGGTCAGGAGATCGAGACCATCCCGGCTAAAAACGGTGAAAACCCCGTCTCTACTAAAAATACAAAAAATTAGCCGGGCGTAGTGGCGGGCGCCTGTAGTCCCAGCTACTTGGGAGGACTGAGGCAGGAGAATGGCGTGAAACCCGGGAGGCGGAGCTTGCAGTGAGCCGAGATCCCGCCACTGCACTCCAGCCTGGGGCGACAGAGCGAGACTCCGTCTACAAAAAAAAAAAAAAAAAAAAAAAAA	NA06986,NA07000,NA07037,NA07051,NA07346,NA07347,NA07357,NA10847,NA10851,NA11830,NA11831,NA11840,NA11881,NA11894,NA11918,NA11919,NA11920,NA11931,NA11992,NA11994,NA11995,NA12003,NA12006,NA12043,NA12044,NA12144,NA12154,NA12155,NA12156,NA12249,NA12287,NA12414,NA12716,NA12717,NA12749,NA12750,NA12751,NA12761,NA12763,NA12776,NA12812,NA12814,NA12815,NA12828,NA12873,NA12874,NA12878,NA12891,NA12892,NA18489…
2	31805686	.	1	.	ALU	+	INS	P1_MEI_123&P2_MEI_477	305	RP|SR	lowcov+trio	NA	.	CEU+YRI+CHB+JPT	0.77|0.74|0.82	49|41|42	75|61|69	.	.	Xing|GR2009|1104685768855	26	198	170	MEI_SR,MEI_RP	80	.	AluYa5	CCGGGCGCGGTGGCTCACGCCTGTAATCCCAGCACTTTGGGAGGCCGAGGCGGGCGGATCACGAGGTCAGGAGATCGAGACCATCCCGGCTAAAAACGGGTGAAAACCCCGTCTCTACTAAAAAATACAAAAAAATTAGCCGGGCGTAGTGGCGGGCGCCTGTAGTCCCAGCTACTTGGGAAGGAACTAGAGGCAGGAGAATGGCGTGAACCCGGGAGGCGGAGCTTGCAGTGAGCCGAGATCCCGCCACCTGCACTCCAGCCTGGGCGACAGAGCGAGACTCCGTCTAAACAAAAAAAAAAAAAAAAAAAAAAAAAA	NA06986,NA07000,NA07037,NA07051,NA07347,NA07357,NA10847,NA10851,NA11829,NA11830,NA11831,NA11840,NA11881,NA11894,NA11918,NA11919,NA11920,NA11931,NA11992,NA11994,NA11995,NA12003,NA12004,NA12043,NA12044,NA12045,NA12144,NA12154,NA12249,NA12287,NA12414,NA12489,NA12716,NA12717,NA12750,NA12751,NA12761,NA12763,NA12776,NA12812,NA12814,NA12815,NA12828,NA12872,NA12873,NA12874,NA12878,NA12891,NA12892,NA18489…
2	33258223	.	6	.	ALU	+	INS	P1_MEI_1468&P2_MEI_478	269	RP|SR	lowcov+trio	NA	.	CEU+YRI	0.01|0.21|0.00	43|35|43	1|15|0	.	.	.	11	18	11	MEI_SR,MEI_RP	80	GENE|LTBP1|ENSG00000049323			NA11831,NA18502,NA18505,NA18519,NA18523,NA18856,NA19099,NA19114,NA19116,NA19147,NA19225,NA19238,NA19240,NA19257
2	33429302	.	15	.	ALU	+	INS	P1_MEI_1469	286	RP	lowcov	NA	.	CEU	0.07|0.00|0.00	42|41|46	6|0|0	.	.	.	11	15	6	MEI_RP	40	GENE|LTBP1|ENSG00000049323			NA06986,NA07346,NA11993,NA12003,NA12716,NA12750
2	33634789	33635117	1	1	ALU	-	DEL	P1_M_061510_2_124&P2_M_061510_2_349	328	SR,RP	lowcov+trio	val	ASM	CEU+YRI+CHB+JPT	0.72|0.50|0.87	40|40|57	58|40|99	esv4426	.	.	15	.	.	wtsi,bc_deletion,broad,washu,pindel_D,UWASH_RP,PINDEL_SR,YALEU_SR,WASHU_RP,WTSI_RP,BC_RP	.	GENE|RASGRP3|ENSG00000152689	AluYb8	TTTTTTTTTTTTTTTTTTTTTTTTTTGAGACGGAGTCTCGCTCTGTCGCCCAGGCCGGACTGCGGACTGCAGTGGCGCAATCTCGGCTCACTGCAAGCTCCGCTTCCCGGGTTCACGCCATTCTCCTGCCTCAGCCTCCCGAGTAGCTGGGACTACAGGCGCCCGCCACCGCGCCCGGCTAATTTTTTGTATTTTTAGTAGAGACGGGGTTTCACCTTGTTAGCCAGGATGGTCTCGATCTCCTGACCTCATGATCCACCCGCCTCGGCCTCCCAAAGTGCTGGGATTACAGGCGTGAGCCACCGCGCCCGGCC	NA06994,NA07037,NA11829,NA11830,NA11831,NA11881,NA11931,NA11992,NA11993,NA11995,NA12006,NA12144,NA12154,NA12156,NA12287,NA12489,NA12751,NA12761,NA12813,NA12891,NA12892,NA18489,NA18498,NA18499,NA18502,NA18504,NA18505,NA18507,NA18508,NA18510,NA18511,NA18517,NA18522,NA18523,NA18532,NA18537,NA18545,NA18555,NA18562,NA18563,NA18609,NA18853,NA18856,NA18858,NA18907,NA18909,NA18912,NA18916,NA18942,NA18945…
2	33799306	.	5	.	ALU	+	INS	P1_MEI_124	302	SR|RP	lowcov	NA	.	CEU+YRI	0.02|0.02|0.00	45|43|46	2|2|0	.	.	.	14	3	4	MEI_SR,MEI_RP	34	GENE|AC008170.1|ENSG00000203386			NA12828,NA18502,NA19108,NA19143
2	33868935	.	12	.	ALU	-	INS	P1_MEI_1470	67	RP	lowcov	NA	.	YRI	0.00|0.09|0.00	42|40|50	0|7|0	.	.	.	11	8	9	MEI_RP	34	GENE|AC008170.1|ENSG00000203386			NA18499,NA18501,NA18517,NA18523,NA18861,NA18907
2	34042274	.	10	.	ALU	+	INS	P2_MEI_2284	.	SR	trio	NA	.	.	.|.|.	0|0|0	0|0|0	.	.	.	.	0	2	MEI_SR	5	GENE|AC008170.1|ENSG00000203386			NA19240
2	34108884	.	1	.	ALU	-	INS	P1_MEI_125&P2_MEI_479	295	RP|SR	lowcov+trio	NA	.	CEU+YRI+CHB+JPT	0.34|0.44|0.29	52|45|48	35|40|28	.	.	Xing|GR2009|1104685769554	16	89	143	MEI_SR,MEI_RP	80	GENE|AC008170.1|ENSG00000203386	AluYa5	TTTCTTTTTTTTTTTTTTTTTTTTTTTTTGTTAGACGGAGTCTCGCTCTGTCGCCCAGGCTGGAGTGCAGTGGCGGGATCTCGGCTCACTGCAAGCTCCGCCTCCCGGGTTCACGCCATTCTCCCGCCTCAGCCTCCCTAAGTAGCTGGGACTACAGGCGCCCGCCACTACGCCCGGCTAATTTTTTGTATTTTTAGTAGAGACGGGGTTTCACCGTTTTAGCCAGGATGGTCTCGATCTCCTGACCTCGTGATCCGCCCGCCTCGGCCTCCCAAAGTGCTGGGATTACAGGCGTGAGCCACCGCGCCCGGCC	NA06986,NA07037,NA07346,NA07357,NA10847,NA10851,NA11881,NA11894,NA11931,NA11992,NA11994,NA12003,NA12004,NA12043,NA12044,NA12045,NA12144,NA12155,NA12249,NA12287,NA12414,NA12489,NA12717,NA12750,NA12751,NA12761,NA12776,NA12814,NA12815,NA12872,NA12873,NA12874,NA12878,NA12891,NA18489,NA18501,NA18502,NA18504,NA18505,NA18507,NA18508,NA18510,NA18511,NA18516,NA18517,NA18519,NA18520,NA18522,NA18526,NA18537…
2	34210478	.	21	.	ALU	-	INS	P1_MEI_1471	62	RP	lowcov	NA	.	YRI	0.00|0.13|0.00	42|41|46	0|11|0	.	.	.	6	5	16	MEI_RP	40	GENE|AC008170.1|ENSG00000203386			NA18504,NA18505,NA18507,NA18516,NA18519,NA18856,NA18912,NA19138,NA19257
2	34320965	.	24	.	ALU	+	INS	P1_MEI_1472&P2_MEI_1476	147	RP	lowcov+trio	NA	.	YRI	0.00|0.08|0.00	44|44|45	0|7|0	.	.	.	.	5	6	MEI_RP	55	GENE|AC008170.1|ENSG00000203386			NA18507,NA18907,NA19116,NA19190,NA19210,NA19238
2	34327166	.	10	.	ALU	-	INS	P1_MEI_1473	136	RP	lowcov	NA	.	YRI+CHB+JPT	0.00|0.09|0.17	41|41|46	0|7|16	.	.	.	13	16	24	MEI_RP	40	GENE|AC008170.1|ENSG00000203386			NA18489,NA18505,NA18510,NA18526,NA18562,NA18572,NA18579,NA18593,NA18605,NA18608,NA18609,NA18638,NA18861,NA18909,NA18956,NA18959,NA19005
2	34497134	34497441	1	1	ALU	-	DEL	P1_M_061510_2_126&P2_M_061510_2_352	307	SR,RP	lowcov+trio	val	ASM	CEU+YRI+CHB+JPT	0.30|0.27|0.23	43|53|41	26|29|19	esv4250	.	.	18	.	.	washu,broad,pindel_D,wtsi,bc_deletion,WASHU_RP,WTSI_RP,PINDEL_SR,UWASH_RP,BC_RP	.	GENE|AC073218.3|ENSG00000226785	AluY	TTTTTTTTTGAGACGGAGTCTCGCTCTGTCGCCCAGGCTGGAGCGCAGTGGCGCGATCTCGGCTCACTGCAAGCTCCGTCTCCCGGGTTCACGCCATTCTCCTGCCTCAGCCTCCCGAGTAGCTGGGACTACAGGCGCCCGCTACCACGCCCGGCTAATTTTTTGTATTTTTAGTAGAGACGGGGTTTCACCGTGTTAGCCAGGATGGTCTCGATCTCCTGACCTCGTGATCCGCCCGCCTCGGCCTCCCAAAGTGCTGGGATTACAGGCGTGAGCCACCGCGCCCGGCC	NA07000,NA07037,NA07346,NA07347,NA07357,NA10847,NA11831,NA11881,NA11894,NA11918,NA11919,NA11920,NA11931,NA11992,NA11994,NA11995,NA12003,NA12004,NA12006,NA12043,NA12044,NA12045,NA12144,NA12154,NA12155,NA12249,NA12287,NA12414,NA12489,NA12716,NA12717,NA12749,NA12750,NA12751,NA12761,NA12763,NA12776,NA12813,NA12828,NA12878,NA12891,NA18486,NA18489,NA18498,NA18499,NA18501,NA18502,NA18504,NA18507,NA18508…
2	34887941	34888186	1	1	ALU	-	DEL	P1_M_061510_2_130&P2_M_061510_2_357	245	RP,SR	lowcov+trio	val	ASM	CEU+YRI+CHB+JPT	0.58|0.20|0.67	38|42|52	44|17|70	esv3047	.	.	14	.	.	pindel_D,wtsi,bc_deletion,broad,WASHU_RP,UWASH_RP,PINDEL_SR,BC_RP	.	GENE|AC079352.1|ENSG00000226994	AluYa5	TTTTTTTTTTTTTTTTTTTTTTTTTTTGAGACGGAGTCTTGCTCTGTCGCCCAGGCTGGAGTGCAGTGGCGGGATCTCGGCTCACTGCAAGCTCCGCCTCCCGGGTTCACGCCATTCTCCTGCCTCAGCCTCCCAAGTAGCTGGGACTACAGGCGCCCGCCACTACGCCCGGCTAATTTTTTGTATTTTTAGTAGAGACGGGGTTTCACCGTTTTAGCCGGGATGGTCTCGA	NA06994,NA07346,NA07347,NA07357,NA10847,NA10851,NA11829,NA11830,NA11881,NA11919,NA11920,NA11992,NA11993,NA11994,NA11995,NA12003,NA12004,NA12006,NA12043,NA12044,NA12045,NA12144,NA12155,NA12287,NA12414,NA12489,NA12717,NA12750,NA12751,NA12763,NA12776,NA12813,NA12828,NA12891,NA18486,NA18489,NA18498,NA18499,NA18501,NA18502,NA18504,NA18505,NA18507,NA18508,NA18510,NA18511,NA18516,NA18517,NA18520,NA18523…
2	34970580	.	41	.	ALU	-	INS	P1_MEI_1474	107	RP	lowcov	NA	.	CEU	0.04|0.00|0.00	40|38|44	3|0|0	.	.	.	.	3	7	MEI_RP	20	GENE|AC079352.1|ENSG00000226994			NA10851,NA11830,NA12751
2	35029747	.	98	.	ALU	-	INS	P1_MEI_1475	236	RP	lowcov	NA	.	YRI	0.00|0.04|0.00	41|38|43	0|3|0	.	.	.	.	2	3	MEI_RP	10	GENE|AC079352.1|ENSG00000226994			NA18523,NA19190
2	35613498	.	25	.	L1	-	INS	P1_MEI_1476	3950	RP	lowcov	NA	.	YRI	0.00|0.06|0.00	40|41|44	0|5|0	.	.	.	11	2	6	MEI_RP	16	.			NA18498,NA18520,NA18523,NA18861
2	35732841	.	6	.	L1	+	INS	P1_MEI_126&P2_MEI_1477	6049	RP|SR	lowcov+trio	NA	.	CEU+YRI	0.12|0.41|.	42|38|0	10|31|0	.	.	Ewing|GR2010|chr2_35732947	14	59	33	MEI_SR,MEI_RP	80	.			NA07000,NA07051,NA07347,NA10847,NA11829,NA12004,NA12489,NA12878,NA12892,NA18498,NA18499,NA18501,NA18505,NA18510,NA18517,NA18519,NA18523,NA18526,NA18532,NA18537,NA18542,NA18562,NA18572,NA18576,NA18592,NA18853,NA18856,NA18858,NA18870,NA18907,NA18942,NA18944,NA18951,NA18960,NA18961,NA18973,NA19108,NA19116,NA19129,NA19138,NA19172,NA19225,NA19238,NA19257
2	35944011	35944331	1	1	ALU	+	DEL	P1_M_061510_2_132	320	SR,RP	lowcov	val	ASM	CEU+YRI+CHB+JPT	0.84|1.00|0.96	44|53|57	74|106|110	.	.	.	15	.	.	washu,wtsi,broad,pindel_D,bc_deletion	.	.	AluYa5	AGGCCGGGCGCGGTGGCTCACGCCTGTAATCCCAGCACTTTGGGAGGCCGAGGCGGGCGGATCACGAGGTCAGGAGATCGAGACCATCCCGGCTAAAACGGTGAAACCCCGTCTCTACTAAAAATACAAAAAATTAGCCGGGCGTAGTGGCGGGCGCCTGTAGTCCCAGCTACTTGGGAGGCTGAGGCAGGAGAATGGCGTGAACCCGGGAGGCGGAGCTTGCAGTGAGCCGAGATCCCGCCACTGCACTCCAGCCTGGGCGACAGAGCGAGACTCCGTCTCAAAAAAAAAAAAAAAAAAAAAAAA	NA06994,NA07037,NA07346,NA07347,NA07357,NA10851,NA11829,NA11830,NA11881,NA11894,NA11919,NA11931,NA11992,NA11993,NA11994,NA11995,NA12004,NA12006,NA12044,NA12155,NA12716,NA12717,NA12751,NA12761,NA12776,NA12813,NA18486,NA18489,NA18498,NA18501,NA18516,NA18517,NA18520,NA18522,NA18532,NA18542,NA18547,NA18550,NA18555,NA18562,NA18571,NA18573,NA18605,NA18853,NA18856,NA18870,NA18940,NA18953,NA18956,NA18964…
2	36029848	.	10	.	ALU	-	INS	P1_MEI_127	98	SR|RP	lowcov	NA	.	CEU+YRI	0.02|0.10|0.00	46|41|48	2|8|0	.	.	Iskow|CELL2010|FSTNXB304IJK82	.	18	11	MEI_SR,MEI_RP	40	.			NA07346,NA12815,NA18508,NA18871,NA19108,NA19129,NA19147,NA19190,NA19257
2	36234749	.	51	.	L1	+	INS	P2_MEI_1478	1461	RP	trio	val	PCR	.	.|.|.	0|0|0	0|0|0	.	.	.	.	10	2	MEI_RP	23	.			NA12892
2	36312961	.	10	.	ALU	+	INS	P1_MEI_3415	.	SR	lowcov	NA	.	.	0.00|.|.	13|0|0	0|0|0	.	.	.	.	0	3	MEI_SR	7	.	AluYb9	GGCCGGGCGCGGTGGCTCACGCCTGTAATCCCAGCACTTTGGGAGGCCGAGGCGGGTGGATCATGAGGTCAGGAGATCGAGACCATCCTGGCTAACAAGGTGAAACCCCGTCTCTACTAAAAATACAAAAATTAGCCGGGCGCGGTGGCGGGCGCCTGTAGTCCCAGCTACTCGGGAAGGCTGAGGCAGGAGAATGGCGTGAACCCGGGAAGCGGAGCTTGCAGTGAGCCGAGATTGCGCCACTGCAGTCCGNAGTCCGACCTGGGCGACAGAGCGAGACTCCGTCTAACAAAAAAAAAAAAAAAAAA	NA19143,NA19143
2	36330188	.	1	.	ALU	-	INS	P1_MEI_3416	314	SR	lowcov	NA	.	CEU	0.08|.|.	13|0|0	2|0|0	.	.	.	26	3	2	MEI_SR	20	.			NA12872,NA11931,NA19141
2	36371303	.	10	.	ALU	-	INS	P1_MEI_128	289	SR|RP	lowcov	NA	.	YRI+CHB+JPT	.|0.02|0.01	0|45|49	0|2|1	.	.	.	.	18	9	MEI_SR,MEI_RP	40	.			NA07000,NA11830,NA11894,NA12044,NA12155,NA12287,NA12414,NA12717,NA12750,NA18510,NA18517,NA18947
2	36809164	36809480	1	1	ALU	+	DEL	P1_M_061510_2_133&P2_M_061510_2_360	316	RP,SR	lowcov+trio	val	ASM	CEU+YRI+CHB+JPT	0.31|0.81|0.59	32|36|34	20|58|40	esv9230	.	.	14	.	.	pindel_D,bc_deletion,wtsi,washu,WTSI_RP,PINDEL_SR,YALEU_SR,WASHU_RP,UWASH_RP,BC_RP	.	GENE|VIT|ENSG00000205221	AluYa5	TGGCCGGGCGCGGTGGCTCACGCCTGTAATCCCAGCACTTTGGGAGGCCGAGGCGGGCGGATCACGAGGTCAGGAGATCGAGACCATCCCGGCTAAAACGGTGAAACCCCGTCTCTACTAAAAATACAAAAAATTAGCCGGGCGTAGTGGCGGGCGCCTGTAGTCCCAGCTACTTGGGAGGCTGAGGCAGGAGAATGGCGTGAACCCGGGAGGCGGAGCTTGCAGTGAGCCGAGATCCCGCCACTGCACTCCAGCCTGGGCGACAGAGCAAGACTCCGTCTCAAAAAAAAAAAAAAAAAGAAA	NA07037,NA07051,NA07347,NA11830,NA11881,NA11920,NA11992,NA11994,NA11995,NA12003,NA12045,NA12144,NA12154,NA12155,NA12156,NA12249,NA12489,NA12716,NA12717,NA12749,NA12750,NA12751,NA12891,NA18489,NA18501,NA18508,NA18517,NA18523,NA18537,NA18547,NA18561,NA18564,NA18566,NA18572,NA18573,NA18576,NA18579,NA18582,NA18593,NA18605,NA18609,NA18638,NA18853,NA18942,NA18945,NA18948,NA18953,NA18960,NA18961,NA18964…
2	38704923	38705232	1	1	ALU	-	DEL	P1_M_061510_2_136&P2_M_061510_2_71	309	SR,RP	lowcov+trio	val	ASM	CEU+YRI+CHB+JPT	1.00|0.78|0.97	44|50|57	88|78|111	.	.	.	14	.	.	wtsi,pindel_D,broad,washu,bc_deletion,BC_RP,PINDEL_SR,AB_RP,YALEU_SR,WASHU_RP,UWASH_RP	.	.	AluYd8	TTTTTTTTTTTTTTTTTTTTTTTTTTTGAGACGGAGTCTCGTTCTGTCGCCCAGGCGGGAGTGCTGTGGCGCGATCTCCGCTCACTGCAAGCTCCGCCTTCCGGGTTCACGCCGTTCTCCTGCCTCAGCCTCTCGAGTAGCTGGGACTACAGGCGCCCGCCACTGCGCCCGGCTAATTTTTTGTATTTTTAGTAGAGACGGGGTTTCACCGTGGTCTCGATCTCCTGACCTCGTGATCCGCCCGCCTCGGCCTCCCAAAGTGCTGGGATTACAGGCGTGAGCCACCGCGCCCGGCC	NA06994,NA11919,NA11920,NA11993,NA12003,NA12004,NA12005,NA12489,NA12717,NA12761,NA12813,NA18489,NA18504,NA18505,NA18507,NA18510,NA18516,NA18517,NA18520,NA18522,NA18523,NA18550,NA18570,NA18603,NA18871,NA18909,NA18916,NA18944,NA18947,NA18951,NA18961,NA18968,NA18971,NA18972,NA18973,NA18974,NA18975,NA18976,NA18981,NA19098,NA19099,NA19119,NA19129,NA19131,NA19137,NA19144,NA19152,NA19153,NA19159,NA19160…
2	38898325	.	10	.	L1	-	INS	P1_MEI_3417	5300	SR	lowcov	NA	.	CEU	0.06|.|.	8|0|0	1|0|0	.	.	.	.	0	3	MEI_SR	7	GENE|DHX57|ENSG00000163214			NA12874,NA12874,NA12874
2	38924981	38925323	1	1	ALU	+	DEL	P1_M_061510_2_138&P2_M_061510_2_365	342	RP,SR	lowcov+trio	val	ASM	CEU+YRI	0.32|0.61|.	28|37|0	18|45|0	esv4781	.	.	13	.	.	bc_deletion,broad,washu,pindel_D,YALEU_SR,WTSI_RP,UWASH_RP,PINDEL_SR,BC_RP	.	GENE|DHX57|ENSG00000163214	AluYa5	AGGCCGGGCGCGGTGGCTCACGCCTGTAATCCCAGCACTTTGGGAGGCCGAGGCGGGCGGATCACGAGGTCAGGAGATCGAGACCATCCCGGCTAAAACGGTGAAACCCCGTCTCTACTAAAAATACAAAAAATTAGCCGGGCGTAGTGGCGGGCGCCTGTAGTCCCAGCTACTTGGGAGGCTGAGGCAGGAGAATGGCGTGAACCCGGGAGGCGGAGCTTGCAGTGAGCCGAGATCGCGCCACTGCACTCCAGCCTGGGCGACAGAGCGAGACTCCGTCTCAAAAAAAAAAAAAAAAAAAAAAAAAAAAAAAAAAAAAAAAAAAAAAAA	NA06986,NA07000,NA07037,NA07051,NA07346,NA07347,NA07357,NA10847,NA10851,NA11829,NA11830,NA11831,NA11881,NA11894,NA11918,NA11919,NA11920,NA11931,NA11992,NA11993,NA11994,NA11995,NA12003,NA12004,NA12005,NA12006,NA12043,NA12044,NA12045,NA12144,NA12155,NA12156,NA12234,NA12249,NA12287,NA12414,NA12489,NA12716,NA12717,NA12749,NA12750,NA12751,NA12761,NA12763,NA12776,NA12813,NA12828,NA12878,NA12891,NA12892…
2	39168830	.	1	.	ALU	-	INS	P1_MEI_3418&P2_MEI_2285	293	SR	lowcov+trio	NA	.	CEU	0.88|.|.	13|0|0	23|0|0	.	.	Xing|GR2009|1104685771010	12	21	7	MEI_SR	58	GENE|SOS1|ENSG00000115904	AluYa5	TCTTTTTTTTTTTTTTTTTTATTTTTTTTGAGGACGGTAGTCTCGCTCTGTCGCCCAGGCTGGAGTGCAGTGGCGGGATCTCGGCTCACTGCAAGCTCCGCCTCCCGGGTTCACGCCATTCTCCTGCCTCAGCCTCCCGAGTAGCTGGGACTACAGGCGCCCCGCCACTACGCCCGGCTAATTTTTTGTATTTTTAGTAGAGACGGGGTTTCACCGTTTTAGCCGGGATGGTCTCGATCTCCTGACCTCGTGATCCCGCCCCGCCTCGGCCTCCCAAAGTGCTGGGATTACAAGCGTGAGCCACCGCGCCCGGCC	NA07346,NA11840,NA11894,NA11918,NA12043,NA12045,NA12234,NA12287,NA12812,NA12814,NA12873,NA12874,NA12878,NA18970,NA19240
2	40467176	.	5	.	ALU	+	INS	P1_MEI_129&P2_MEI_480	284	RP|SR	lowcov+trio	val	PCR	CEU	0.24|.|.	49|0|0	24|0|0	.	.	.	15	61	30	MEI_SR,MEI_RP	80	GENE|SLC8A1|ENSG00000183023	AluYb8	GGCCGGGCGGCGGTGGCTCACGCCTGTAATCCCAGCACTTTGGGAGGCCGAGGCGGGTGGATCATGAGGTCAGGAGATCGAGACCATCCTGGCTAACAAGGTGAAACCCCGTCTCTACTAAAAATACAAAAAATTAGCCGGCGCGGTGGCGGGCGCCTGTAGTCCCAGCTACTCGGGAAGGACTGAGGCAGGAGAATGGCGTGAACCCGGGGAAGCGGAGCTTGCAGTGAGCCGAGATTGCGCCCCTGCAGTCCGCAGTCTGGCCTGGGCACAGAGCGAGACTCCGTCTAACAAAAAAAAAAAAAAAAAAACAAAAAAAAAA	NA06986,NA07000,NA07037,NA07051,NA07346,NA07347,NA10847,NA10851,NA11840,NA11918,NA11994,NA12003,NA12006,NA12043,NA12144,NA12154,NA12249,NA12716,NA12751,NA12776,NA12812,NA12872,NA12878,NA12891,NA12892,NA18499,NA18502,NA18504,NA18510,NA18523,NA18552,NA18562,NA18566,NA18579,NA18608,NA18638,NA18871,NA18945,NA18952,NA18953,NA18956,NA19172,NA19225,NA19257
2	40831643	40831975	1	1	ALU	-	DEL	P1_M_061510_2_143&P2_M_061510_2_370	332	RP,SR	lowcov+trio	val	ASM	CEU+YRI+CHB+JPT	0.60|0.52|0.77	36|47|57	43|49|88	esv4273	.	.	11	.	.	pindel_D,broad,washu,wtsi,bc_deletion,YALEU_SR,WTSI_RP,WASHU_RP,PINDEL_SR,BC_RP	.	GENE|AC007317.1|ENSG00000233128	AluYb8	TTTTTTTTTTTTTTTTTTTTTTTTTTTTTGAGACGGAGTCTCGCTCTGTCACCCCGGCGGGACTGCGGACTGCAGTGGCGCAATCTCGGCTCACTGCAAGCTCCGCTTCCCGGGTTCACGCCATTCTCCTGCCTCAGCCTCCCGAGTAGCTGGGACTACAGGCGCCCGCCACCGCGCCCGGCTAATTTTTTTTTGTATTTTTAGTAGAGACGGGGTTTCGCCTTGTTAGCCAGGATGGTCTCGATCTCCTGACCTCATGATCCACCCGCCTCGGCCTCCCAAAGTGCTGGGATTACAGGCGTGAGCCACCGCGCCCGGCCGG	NA06986,NA07000,NA07347,NA11829,NA11881,NA11894,NA11920,NA11931,NA11995,NA12003,NA12005,NA12043,NA12044,NA12045,NA12144,NA12154,NA12156,NA12249,NA12287,NA12489,NA12750,NA12761,NA12763,NA12813,NA12828,NA12878,NA12891,NA12892,NA18486,NA18489,NA18498,NA18499,NA18505,NA18507,NA18508,NA18510,NA18517,NA18519,NA18520,NA18522,NA18523,NA18550,NA18555,NA18562,NA18564,NA18566,NA18570,NA18571,NA18579,NA18609…
2	41826645	41829369	1	1	SVA	+	DEL	P1_M_061510_2_146&P2_M_061510_2_372	2724	RP,SR	lowcov+trio	val	ASM	CEU	0.33|.|.	39|0|0	26|0|0	esv3465	.	.	15	.	.	pindel_D,wtsi,washu,bc_deletion,broad,PINDEL_SR,YALEU_SR,BC_RP,YALEU_RP,WTSI_RP,WASHU_RP,UWASH_RP	.	.	SVA_F	CGCTCTCCCTCTCCCTCTCCCTCTCCCTCTCCCTCTCCCTCTCCCTCTCCCTCTCCGTCCCTCCCTCTCCGTCTCCGTCTCCGTCTCCGTCTCCCTCTCCCCACGGTCTCCCTCTCATGCGGAGCCGAAGCTGGACTGTACTGCTGCCATCTCGGCTCACTGCAACCTCCCTGCCTGATTCTCCTGCCTCAGCCTGCCGAGTGCCTGCGATTGCAGGCACGCGCCGCCACGCCTGACTGGTTTTGGTGGAGACGGGGTTTCGCTGTGTTGGCCGGACCGGTCTCCAGCCCCTAACCGCGAGTGATCCGCCAACCTCGGCCTCCCGAGGTGCCGGGATTGCAGACGGAGTCTCGTTCACTCAGTGCTCAATGGTGCCCAGGCTGGAGTGCAGTGGCGTGA…	NA06986,NA06994,NA07000,NA07037,NA07051,NA07346,NA07347,NA07357,NA10847,NA10851,NA11830,NA11831,NA11881,NA11918,NA11919,NA11920,NA11931,NA11992,NA11993,NA11994,NA12003,NA12004,NA12005,NA12006,NA12043,NA12044,NA12045,NA12144,NA12154,NA12155,NA12156,NA12249,NA12414,NA12489,NA12717,NA12749,NA12750,NA12751,NA12763,NA12776,NA12813,NA12878,NA12891,NA12892,NA18486,NA18489,NA18498,NA18499,NA18501,NA18502…
2	41838610	.	5	.	ALU	+	INS	P1_MEI_130	293	SR|RP	lowcov	NA	.	CEU+YRI+CHB+JPT	0.22|0.06|0.09	47|40|45	21|5|8	.	.	.	13	23	25	MEI_SR,MEI_RP	40	.			NA07037,NA07347,NA11831,NA11840,NA11881,NA11920,NA11931,NA11992,NA12003,NA12043,NA12044,NA12155,NA12156,NA12234,NA12750,NA12761,NA12763,NA12776,NA12814,NA12874,NA18507,NA18523,NA18542,NA18555,NA18563,NA18571,NA18572,NA18576,NA18638,NA18909,NA19108,NA19172
2	42877571	.	1	.	ALU	-	INS	P1_MEI_3419&P2_MEI_481	285	RP|SR	lowcov+trio	NA	.	.	.|.|.	0|0|0	0|0|0	.	.	Xing|GR2009|1104685772179	6	22	4	MEI_SR,MEI_RP	80	.	AluYc	TTTTTTTTTTTTTTTTTTTTTTTTTTTTTTGTTAGACGGAGTCTCGCTCTGTCGCCCAGGCTGGAGTGCAGCGGCGCGATCTCGGCTCACTGCAAGCTCCGCCTCCCGGGTTCACGCCATTCTCCTTGCCTCAGCCTCCCGAGGTAGCTGGGACTACAGGCGCCCGCCACTACGCCCGGCTTAACTTTTTGTATTTTTTAGTAGAGACGGGGTTTCACCTTGGTCTCGATCTCCTGACCTCGTGATCCGCCCGCCTCGGCCTCCCCAAAGTGCTGGGATTACAGGCGTGAGCCACCGCGCCCGGCC	NA07346,NA11840,NA12043,NA12249,NA12287,NA12812,NA12874,NA12878,NA12892,NA18970,NA19141,NA19143,NA19238,NA19239,NA19240
2	43476125	.	10	.	ALU	+	INS	P2_MEI_2286	.	SR	trio	NA	.	.	.|.|.	0|0|0	0|0|0	.	.	.	.	0	1	MEI_SR	4	GENE|THADA|ENSG00000115970			NA19240
2	43506743	.	51	.	L1	+	INS	P1_MEI_1477	2609	RP	lowcov	NA	.	CEU	0.01|0.00|0.00	44|37|41	1|0|0	.	.	.	.	2	3	MEI_RP	10	GENE|THADA|ENSG00000115970			NA11995
2	43741064	43747143	1	1	L1	-	DEL	P1_M_061510_2_148	6079	RP	lowcov	val	ASM	CEU+YRI+CHB+JPT	1.00|0.93|1.00	44|53|57	88|99|114	.	.	.	16	.	.	wtsi,bc_deletion	.	GENE|PLEKHH2|ENSG00000152527	L1PA2	TTTTTTTTTTTTTTTTTTGCCAATTAAGGAATTTATTTTTTTTTTTTTATACTTTAAGTTTTAGGGTACATGTGCACATTGTGCAGGTTAGTTACATATGTATAAATGTGCCATGCTGGTGCGCTGCACCCACTAACTCGTCATCTAGCATTAGGTATATCTCCCAATGCCACCCCTCCCCCCTCCCCCCACCCCACCACAGTCCCCAGAGTGTGATATTCCCCTTCCTGTGACCATGTGATCTCATTGTTCAATTCCCACCTATGAGTGAGAATATGCAGTGTTTGGTTTTTTGTTCTTGCGATAGTTTACTGAGAATGATGGTTTCCAATTTCATCCATGTCCCTACAAAGGACATGAACTCATCATTTTTTATGGCTGCATAGTATTCCATGGTGT…	NA18502,NA18504,NA18871,NA18912,NA19129
2	43896615	.	10	.	L1	+	INS	P1_MEI_3420	5254	SR	lowcov	NA	.	CEU	0.05|.|.	10|0|0	1|0|0	.	.	.	.	1	0	MEI_SR	4	GENE|ABCG5|ENSG00000138075			NA11881
2	43933589	.	21	.	ALU	+	INS	P1_MEI_1478&P2_MEI_1480	269	RP	lowcov+trio	NA	.	CEU+YRI	0.03|0.11|0.00	45|38|41	3|8|0	.	.	.	14	8	6	MEI_RP	56	GENE|ABCG8|ENSG00000143921			NA11894,NA12003,NA12891,NA18508,NA18519,NA18912,NA19102,NA19129,NA19238
2	44091479	.	10	.	ALU	-	INS	P2_MEI_2287	.	SR	trio	NA	.	.	.|.|.	0|0|0	0|0|0	.	.	.	.	1	0	MEI_SR	4	.			NA19240
2	44637091	44637412	1	1	ALU	-	DEL	P1_M_061510_2_151&P2_M_061510_2_376	321	RP,SR	lowcov+trio	val	ASM	CEU+YRI+CHB+JPT	0.33|0.36|0.89	40|32|33	26|23|59	.	.	.	14	.	.	pindel_D,wtsi,broad,bc_deletion,washu,WTSI_RP,BC_RP	.	GENE|C2orf34|ENSG00000143919	AluYb8	TTTTTTTTTTTTTTTTTTTGAGACGGAGTCTCGCTCTGTCGCCCAGGTCGGACTGCGGACTGCAGTGGCGCAATCTCGGCTCACTGCAAGCTCCGCTTCCCGGGTTCACGCCATTCTCCTGCCTCAGCCTCCCGAGTAGCTGGGACTACAGGCGCCCGCCACCGCGCCCGGCTAATTTTTTGTATTTTTAGTAGAGACGGGGTTTCACCTTGTTAGCCAGGATGGTCTTGATCTCCTGACCTCATGATCCACCCGCCTCGGCCTCCCAAAGTGCTGGGATTACAGGCGTGAGCCACCGCGCCCGGCCC	NA06986,NA06994,NA07000,NA07037,NA07051,NA07346,NA07347,NA10847,NA10851,NA11829,NA11830,NA11831,NA11881,NA11894,NA11918,NA11919,NA11920,NA11931,NA11992,NA11993,NA11994,NA11995,NA12003,NA12004,NA12005,NA12043,NA12044,NA12045,NA12144,NA12154,NA12155,NA12156,NA12249,NA12287,NA12414,NA12489,NA12716,NA12717,NA12749,NA12750,NA12751,NA12761,NA12763,NA12776,NA12813,NA12828,NA12878,NA12891,NA12892,NA18486…
2	44679339	.	1	.	ALU	+	INS	P1_MEI_131&P2_MEI_482	293	RP|SR	lowcov+trio	val	PCR	CEU+YRI+CHB+JPT	0.50|0.42|0.33	49|42|50	49|35|33	.	.	.	14	162	134	MEI_SR,MEI_RP	80	GENE|C2orf34|ENSG00000143919	AluYa5	GGCCGGGCGCGGTGGCTCACGCCTGTAATCCCAGCACTTTGGGAGGCCGAGGCGGGCGGATCACGAGGTCAGGAGATCGAGACCATCCCGGCTAAAACGGTGAAACCCCGTCTCTACTAAAAATACAAAAAATTAGCCGGGCGTAGTGGCGGGCGCCTGTAGTCCCAGCTACTTGGGAGGCTGAGGCAGGAGAATGGCGTGAACCCGGGAGGCGGAGCTTGCAGTGAGCCGAGATCGCGCCACTGCACTCCAGCCCTGGGCGACAGAGCGAGACTCCGTACTCTACAAAAAAAAATAAAAAAAAAAAAA	NA06986,NA07000,NA07037,NA07051,NA07347,NA10847,NA10851,NA11831,NA11840,NA11881,NA11894,NA11918,NA11919,NA11920,NA11931,NA11992,NA11993,NA12003,NA12004,NA12006,NA12043,NA12044,NA12144,NA12155,NA12156,NA12249,NA12414,NA12489,NA12716,NA12717,NA12749,NA12750,NA12751,NA12761,NA12763,NA12815,NA12828,NA12872,NA12878,NA12891,NA12892,NA18489,NA18502,NA18505,NA18507,NA18516,NA18517,NA18519,NA18523,NA18526…
2	44702758	.	10	.	ALU	-	INS	P1_MEI_3421	.	SR	lowcov	NA	.	CEU	0.03|.|.	15|0|0	1|0|0	.	.	.	.	1	0	MEI_SR	4	GENE|C2orf34|ENSG00000143919			NA12872
2	44876723	.	10	.	ALU	+	INS	P1_MEI_3422	.	SR	lowcov	NA	.	CEU	0.04|.|.	13|0|0	1|0|0	.	.	.	.	0	2	MEI_SR	5	.			NA11840,NA11840
2	45162738	.	21	.	SVA	+	INS	P2_MEI_1481	1243	RP	trio	NA	.	.	.|.|.	0|0|0	0|0|0	.	.	.	.	5	36	MEI_RP	40	.			NA19239,NA19240
2	45524342	.	10	.	L1	-	INS	P1_MEI_3423	2444	SR	lowcov	NA	.	CEU	0.04|.|.	13|0|0	1|0|0	.	.	.	.	0	1	MEI_SR	4	GENE|SRBD1|ENSG00000068784			NA12814
2	45855578	.	19	.	L1	?	INS	P1_MEI_1479	978	RP	lowcov	NA	.	CHB+JPT	0.00|0.00|0.12	36|39|48	0|0|12	.	.	.	1	9	13	MEI_RP	40	GENE|PRKCE|ENSG00000171132			NA18561,NA18564,NA18576,NA18940,NA18942,NA18944,NA18945,NA18952,NA18956,NA18973
2	46049689	.	4	.	ALU	+	INS	P1_MEI_132&P2_MEI_483	305	RP|SR	lowcov+trio	val	PCR	CEU+YRI	0.27|0.24|.	51|42|0	28|20|0	.	.	.	16	99	43	MEI_SR,MEI_RP	80	GENE|PRKCE|ENSG00000171132			NA06986,NA07000,NA07037,NA07051,NA07346,NA07357,NA10851,NA11894,NA11920,NA11995,NA12003,NA12006,NA12045,NA12144,NA12154,NA12155,NA12249,NA12414,NA12489,NA12717,NA12763,NA12815,NA12872,NA12891,NA18498,NA18499,NA18501,NA18505,NA18508,NA18517,NA18520,NA18522,NA18537,NA18573,NA18870,NA18907,NA18909,NA18916,NA18944,NA18952,NA18961,NA19005,NA19099,NA19102,NA19147,NA19238,NA19240,NA19257
2	46287286	46287448	1	1	ALU	+	DEL	P1_M_061510_2_153&P2_M_061510_2_378	162	SR,RP	lowcov+trio	val	ASM	CEU+YRI	0.54|0.17|.	37|32|0	40|11|0	esv3478	.	.	15	.	.	washu,pindel_D,bc_deletion,WASHU_RP,PINDEL_SR,YALEU_SR,BC_RP,UWASH_RP	.	.	AluYb8	TGGGAGGCTGAGGCAGGAGAATGGCGTGAACCCGGGAAGCGGAGCTTGCAGTGAGCCGAGATTGCGCCACTGCAGTCCGCAGTCCCACCTGGGCGACAGAGCGAGACTCCGTCTCAAAAAAAAAAAAAAAAAAAAAAAAAAAAAAAAA	NA06986,NA07000,NA07037,NA07051,NA07346,NA07357,NA10847,NA11829,NA11830,NA11831,NA11881,NA11919,NA11920,NA11993,NA11994,NA12006,NA12045,NA12154,NA12155,NA12249,NA12414,NA12717,NA12749,NA12750,NA12776,NA12892,NA18489,NA18498,NA18499,NA18501,NA18502,NA18504,NA18507,NA18508,NA18510,NA18517,NA18519,NA18520,NA18522,NA18537,NA18542,NA18545,NA18547,NA18550,NA18555,NA18566,NA18571,NA18572,NA18573,NA18577…
2	46763636	46763952	1	1	ALU	-	DEL	P1_M_061510_2_155&P2_M_061510_2_379	316	RP,SR	lowcov+trio	val	ASM	CEU+YRI+CHB+JPT	0.39|0.22|0.35	41|43|55	32|19|38	esv3545	.	.	18	.	.	broad,pindel_D,wtsi,washu,bc_deletion,YALEU_SR,WTSI_RP,UWASH_RP,WASHU_RP,BC_RP,PINDEL_SR	.	.	AluYa5	TTTTTTTTTTTTTTTGAGACGGAGTCTCGCTCTGTCGCCCAGGCTGGAGTGCAGTGGCGGGATCTCGGCTCACTGCAAGCTCCGCCTCCCGGGTTCACGCCATTCTCCTGCCTCAGCCTCCCAAGTAGCTGGGACTACAGGCGCCCGCCACTACGCCCGGCTAATTTTTTTGTATTTTTAGTAGAGACGGGGTTTCACCATTTTTTAGCCGGGATGGTCTCGATCTCCTGACCTCGTGATCCGCCCGCCTCGGCCTCCCAAAGTGCTGGGATTACAGGCGTGAGCCACCGCGCCCGGCC	NA06986,NA07000,NA07037,NA07051,NA07346,NA07347,NA07357,NA10847,NA11829,NA11831,NA11881,NA11894,NA11918,NA11919,NA11920,NA11931,NA11992,NA11993,NA11994,NA12003,NA12004,NA12006,NA12043,NA12044,NA12045,NA12144,NA12154,NA12156,NA12489,NA12716,NA12717,NA12749,NA12750,NA12751,NA12761,NA12763,NA12813,NA12828,NA12878,NA12891,NA12892,NA18486,NA18489,NA18498,NA18499,NA18501,NA18502,NA18504,NA18505,NA18507…
2	46782454	.	1	.	ALU	-	INS	P1_MEI_133&P2_MEI_484	270	RP|SR	lowcov+trio	val	PCR	YRI+CHB+JPT	.|0.65|0.49	0|41|49	0|53|48	.	.	Xing|GR2009|1104685773117	4	118	185	MEI_SR,MEI_RP	80	GENE|SOCS5|ENSG00000171150			NA06986,NA07000,NA07037,NA07346,NA07347,NA10847,NA11830,NA11831,NA11881,NA11894,NA11918,NA11920,NA11992,NA11995,NA12003,NA12004,NA12043,NA12044,NA12045,NA12154,NA12156,NA12234,NA12287,NA12716,NA12717,NA12750,NA12751,NA12761,NA12763,NA12776,NA12812,NA12815,NA12828,NA12873,NA12874,NA12878,NA12892,NA18498,NA18499,NA18502,NA18504,NA18505,NA18507,NA18508,NA18510,NA18511,NA18516,NA18517,NA18520,NA18523…
2	47172784	.	7	.	ALU	-	INS	P1_MEI_3424&P2_MEI_2288	.	SR	lowcov+trio	val	PCR	CEU	0.68|.|.	11|0|0	15|0|0	.	.	.	.	14	0	MEI_SR	28	GENE|CALM2|ENSG00000143933			NA07347,NA11840,NA11918,NA11931,NA12287,NA12814,NA12815,NA12872,NA12878
2	48130024	.	9	.	ALU	+	INS	P1_MEI_134	53	SR|RP	lowcov	val	PCR	CEU	0.14|0.00|0.00	50|43|47	14|0|0	.	.	.	3	15	12	MEI_SR,MEI_RP	40	GENE|AC079807.1|ENSG00000230773			NA07037,NA07347,NA12003,NA12004,NA12006,NA12043,NA12044,NA12249,NA12414,NA12489,NA12716,NA12761
2	48130957	.	10	.	L1	+	INS	P1_MEI_3425	3234	SR	lowcov	NA	.	.	0.00|.|.	18|0|0	0|0|0	.	.	.	.	1	0	MEI_SR	4	GENE|AC079807.1|ENSG00000230773			NA19141
2	49466386	49466709	1	1	ALU	-	DEL	P1_M_061510_2_161&P2_M_061510_2_385	323	SR,RP	lowcov+trio	val	ASM	CEU+YRI+CHB+JPT	0.17|0.36|0.06	35|38|44	12|27|5	esv3283	.	.	16	.	.	pindel_D,bc_deletion,broad,washu,wtsi,WASHU_RP,YALEU_SR,BC_RP,WTSI_RP,UWASH_RP,PINDEL_SR	.	.	AluYa5	TTTTTTTTTTTTTTTTTTTTTTTTTTTTGAGACGGAGTCTCGCTCTGTCGCCCAGGCTGGAGTGCAGTGGCGGGATCTCGGCTCACTGCAAGCTCCGCCTCCCGGGTTCACGCCATTCTCCTGCCTCAGCCTCCCAAGTAGCTGGGACTACAGGCGCCTGCCACTACGCCCGGCTAATTTTTTGTATTTTTAGTAGAGACGGGGTTTCACCGTTTTAGCCGGGATGGTCTCGATCTCCTGACCTCGTGATCCGCCCGCCTCGGCCTCCCAAAGTGCTGGGATTACAGGCGTGAGCCACCGCGCCCGGC	NA06986,NA06994,NA07000,NA07037,NA07051,NA07346,NA07347,NA07357,NA10847,NA10851,NA11829,NA11830,NA11831,NA11881,NA11894,NA11918,NA11919,NA11920,NA11931,NA11992,NA11993,NA11994,NA11995,NA12003,NA12004,NA12005,NA12043,NA12044,NA12045,NA12144,NA12154,NA12156,NA12249,NA12287,NA12414,NA12489,NA12716,NA12717,NA12749,NA12750,NA12751,NA12761,NA12763,NA12776,NA12813,NA12828,NA12878,NA12891,NA12892,NA18486…
2	49586984	.	4	.	ALU	-	INS	P1_MEI_135&P2_MEI_485	304	RP|SR	lowcov+trio	NA	.	CEU+YRI+CHB+JPT	0.56|0.69|0.84	51|40|45	57|55|76	.	.	Xing|GR2009|1104685773815	15	117	183	MEI_SR,MEI_RP	80	.	AluYb8	TTTTTTTTNTTTTTTTTTTTTTTTTTTTGTAGACGGAGTCTCGCTCTGTCGCCCAGGCCGGACTGCGGACTGCAGTGGCGCAATCTCGGCTCACTGCAAGCTCCGCTTCCCGGGTTTCACGCCATTCTACCTGCCTCTAGTTTCCTTTCCCGAGTAGCTGGGACTACAGGCGCCCGCCACCGCGCCCGGCTAATTTTTTGTATTTTTTAGTAGAGACGGGGTTTCACCTTGTTAGCCAGGATGGTCTCGATCTCCTGACCTCATGACTCCACCCGCCTCGGCCTCCCAAAGTGCTGGGATTACAGGCGTGAGCCACCGCGCCCGGCC	NA06986,NA07000,NA07037,NA07051,NA07346,NA10847,NA10851,NA11829,NA11830,NA11831,NA11840,NA11881,NA11894,NA11918,NA11919,NA11920,NA11931,NA11992,NA11993,NA11994,NA11995,NA12006,NA12043,NA12045,NA12144,NA12154,NA12155,NA12249,NA12287,NA12414,NA12489,NA12717,NA12749,NA12750,NA12751,NA12761,NA12763,NA12776,NA12815,NA12828,NA12872,NA12873,NA12874,NA12878,NA12891,NA18489,NA18498,NA18499,NA18501,NA18504…
2	49633910	.	10	.	ALU	+	INS	P2_MEI_2289	.	SR	trio	val	PCR	.	.|.|.	0|0|0	0|0|0	.	.	.	.	0	2	MEI_SR	5	.			NA12878
2	50030289	.	1	.	ALU	-	INS	P1_MEI_136	293	SR|RP	lowcov	NA	.	YRI	0.00|0.07|0.00	50|40|42	0|6|0	.	.	.	13	5	12	MEI_SR,MEI_RP	40	GENE|NRXN1|ENSG00000179915			NA18499,NA18510,NA18523,NA19114,NA19141,NA19143,NA19147
2	50187595	.	10	.	L1	-	INS	P2_MEI_2290	.	SR	trio	NA	.	.	.|.|.	0|0|0	0|0|0	.	.	.	.	1	0	MEI_SR	4	GENE|NRXN1|ENSG00000179915			NA12878
2	50456133	.	1	.	ALU	-	INS	P1_MEI_137&P2_MEI_486	295	RP|SR	lowcov+trio	val	PCR	CEU+YRI+CHB+JPT	0.34|0.64|0.69	53|44|47	36|56|65	.	.	.	14	145	210	MEI_SR,MEI_RP	80	GENE|NRXN1|ENSG00000179915	AluYb8	TTCTTTTTTTTTTTTTTTTTTTTTTTTTTTGTAGACGGAGTCTCGCTCTGTCGCCCAGGCCGGACTGCGGACTGCAGTGGCGCAATCTCGGCTCACTGCAAGCTCCGCTTCCCGGGTTCACGCCATTCTCCTGCCTCAGCCTCCCGAGTAGCTGGGACTACAGGCGCCCGCCACCGCGCCCGGCTAATTTTTTGTATTTTTAGTAGAGACGGGGGTTTCACCTTGTTAGCCAGGATGGTCTCGATCTCCTGACCTCCTGATCCACCCGCCTCGGACCTCCCAAAGTGCTGGGATTACAGGCGTGAGCCACCGCGCCCGGCC	NA06986,NA07037,NA07051,NA07346,NA07347,NA07357,NA10847,NA10851,NA11881,NA11919,NA11920,NA11931,NA11994,NA12004,NA12043,NA12144,NA12154,NA12156,NA12234,NA12249,NA12414,NA12489,NA12716,NA12749,NA12751,NA12761,NA12763,NA12776,NA12814,NA12815,NA12874,NA12878,NA12892,NA18489,NA18498,NA18499,NA18501,NA18504,NA18505,NA18507,NA18511,NA18516,NA18517,NA18519,NA18520,NA18522,NA18523,NA18526,NA18537,NA18542…
2	50562389	50562709	1	1	ALU	-	DEL	P1_M_061510_2_163	320	SR,RP	lowcov	val	ASM	CEU+YRI+CHB+JPT	1.00|0.74|1.00	44|52|57	88|77|114	.	.	.	15	.	.	washu,pindel_D,broad,wtsi,bc_deletion	.	GENE|NRXN1|ENSG00000179915	AluYa5	TTTTTTTTTTTTTTTTTTTTTTGAGACGGAGTCTCGCTCTGTCGCCCAGGCTGGAGTGCAGTGGCGGGATCTCGGCTCACTGCAAGCTCCGCCTCCCGGGTTCACGCTATTCTCCTGCCTCAGCCTCCCAAGTAGCTGGGACTACAGGCGCCCGCCACTACGCCCGGCTAATTTTTTTTTGTATTTTTAGTAGAGACGGGGTTTCACCGTTTTAGCCGGGATGGTCTCGATCTCCTGACCTCGTGATCCGCCCGCCTCGGCCTCCCAAAGTGCTGGGATTACAGGCGTGAGCCACCGCGCCCGGCC	NA06994,NA07000,NA07346,NA07357,NA11829,NA11918,NA11995,NA12004,NA12044,NA12045,NA12155,NA12156,NA12813,NA18486,NA18498,NA18499,NA18501,NA18504,NA18507,NA18511,NA18519,NA18577,NA18592,NA18856,NA18858,NA18861,NA18871,NA18912,NA18945,NA18953,NA18967,NA18968,NA18971,NA18972,NA18974,NA18975,NA18976,NA18981,NA19093,NA19098,NA19108,NA19114,NA19116,NA19119,NA19129,NA19131,NA19137,NA19138,NA19144,NA19153…
2	50570153	.	9	.	ALU	+	INS	P1_MEI_1480	166	RP	lowcov	val	PCR	YRI	0.00|0.24|0.00	41|40|48	0|19|0	.	.	.	15	34	5	MEI_RP	40	GENE|NRXN1|ENSG00000179915			NA18498,NA18501,NA18511,NA18519,NA18522,NA18856,NA18858,NA18861,NA18871,NA18912,NA19093,NA19102,NA19108,NA19114,NA19129,NA19138,NA19190
2	51284213	.	13	.	ALU	-	INS	P1_MEI_1481	299	RP	lowcov	NA	.	YRI	0.00|0.12|0.00	41|39|43	0|9|0	.	.	.	14	9	10	MEI_RP	38	GENE|AC139712.4|ENSG00000231918			NA18499,NA18501,NA18511,NA18871,NA19099,NA19108,NA19114
2	51322728	.	4	.	ALU	+	INS	P1_MEI_3426&P2_MEI_2291	282	SR	lowcov+trio	NA	.	.	.|.|.	0|0|0	0|0|0	.	.	.	9	1	13	MEI_SR	48	GENE|AC139712.4|ENSG00000231918	AluYb8	TTTGGGAGGCCGAGGCGGGTGGATCATGAGGTCAGGAGATCGAGACCATCCTGGCTAACAAGGTGAAACCCCCGTCTCTACTAAAAATACAAAAAATTAGCCGGGCGCGGTGGCGGGCGCCTGTAGTCCCAGCTACTCGGGAGGCTGAGGCAGGAGAATGGCGTGAACCCGGGAAGCGGAGCTTGCAGTGAGCCGAGATTGCGCCACTGCAGTCCGCAGTCCGGCCTGGGCGACAGAGCGAGACTCCGTCTAAAACAAAAAAAAAAAAAAAAAANAAAAAAA	NA12045,NA12872,NA12874,NA12878,NA19141,NA19240
2	51466957	.	4	.	ALU	+	INS	P1_MEI_138&P2_MEI_487	314	RP|SR	lowcov+trio	NA	.	CEU+CHB+JPT	0.17|.|0.30	40|0|30	14|0|18	.	.	.	35	56	29	MEI_SR,MEI_RP	80	GENE|AC139712.4|ENSG00000231918	AluY	GGCCGGGCGCGGTGGCTCACGCCTGTAATCCCAGCACTTTGGGAGGCCGAGGCGGGCGGATCACGAGGTCAGGAGATCGAGACCATCCTGGCTAACACGGTGAAACCCCGTCTCTACTAAAAATACAAAAAATTAGCCGGGCGTGGTAGCGGGCGCCTGTAGTCCCAGCTACTACGGGAGGCTGAGGCAGGAGAATGGCGTGAACCCGGGAGGCGGAGCTTGCAGTGAGCCGAGATGGCGCCACTGCACTCCAGCCTGGGCGACAGCGAGACTCCGTCTACAAAAAAAAAAAAAA	NA07000,NA07346,NA11881,NA11918,NA11919,NA11993,NA12045,NA12234,NA12249,NA12749,NA12750,NA12751,NA12812,NA12815,NA12872,NA18501,NA18502,NA18510,NA18517,NA18520,NA18522,NA18523,NA18537,NA18542,NA18552,NA18558,NA18562,NA18566,NA18570,NA18572,NA18608,NA18609,NA18638,NA18853,NA18912,NA18916,NA18945,NA18959,NA18961,NA18970,NA19102,NA19114,NA19116,NA19129,NA19138,NA19143,NA19210,NA19238,NA19239,NA19240…
2	51849471	.	23	.	ALU	-	INS	P1_MEI_1482	37	RP	lowcov	NA	.	CEU	0.04|.|0.00	35|0|35	3|0|0	.	.	.	.	5	14	MEI_RP	38	GENE|AC139712.4|ENSG00000231918			NA10851,NA12750,NA18505,NA18523,NA18856,NA18912,NA19257
2	52146144	.	14	.	ALU	+	INS	P1_MEI_1483	242	RP	lowcov	NA	.	.	.|.|.	0|0|0	0|0|0	.	.	.	.	.	.	MEI_RP	3	GENE|AC139712.4|ENSG00000231918			NA18519,NA18861,NA19099,NA19172
2	53007074	.	10	.	ALU	+	INS	P1_MEI_3427	278	SR	lowcov	NA	.	CEU	0.04|.|.	13|0|0	1|0|0	.	.	.	.	1	0	MEI_SR	4	.			NA12873
2	53313554	.	7	.	L1	+	INS	P1_MEI_3428&P2_MEI_2292	.	SR	lowcov+trio	NA	.	CEU	0.19|.|.	16|0|0	6|0|0	.	.	Ewing|GR2010|chr2_53313665	.	13	0	MEI_SR	26	.			NA11931,NA12045,NA12815,NA12873,NA12874,NA12878,NA19141
2	54527085	.	5	.	ALU	-	INS	P1_MEI_139&P2_MEI_1482	303	RP|SR	lowcov+trio	NA	.	CEU+YRI+CHB+JPT	0.17|0.37|0.22	53|45|49	18|33|22	.	.	.	14	65	114	MEI_SR,MEI_RP	80	.			NA07051,NA07347,NA10847,NA10851,NA11830,NA11840,NA11894,NA12003,NA12043,NA12045,NA12144,NA12156,NA12249,NA12414,NA12717,NA12749,NA12761,NA18498,NA18499,NA18501,NA18504,NA18505,NA18507,NA18508,NA18510,NA18517,NA18519,NA18520,NA18523,NA18526,NA18555,NA18561,NA18562,NA18563,NA18564,NA18572,NA18573,NA18579,NA18582,NA18593,NA18605,NA18609,NA18856,NA18861,NA18870,NA18871,NA18907,NA18940,NA18944,NA18945…
2	54546982	54547246	1	1	ALU	+	DEL	P1_M_061510_2_172&P2_M_061510_2_393	264	RP,SR	lowcov+trio	val	ASM	YRI	.|0.36|.	0|28|0	0|20|0	esv3076	.	.	16	.	.	pindel_D,washu,bc_deletion,YALEU_SR,PINDEL_SR,BC_RP,UWASH_RP	.	GENE|SPTBN1|ENSG00000115306	AluY	TCGAGACCATCCTGGCTAACACGGTGAAACCCCGTCTCTACTAAAAATACAAAAAATTAGCCGGGCGTGGTAGCGGGCGCCTGTAGTCCCAGCTACTCGGGAGGCTGAGGCAGGAGAATGGCGTGAACCCGGGAGGCGAAGCTTGCAGTGAGCCGAGATCGCGCCACTGCACTCCAGCCTGGGCGACAGAGCGAGACTCCGTCTCAAAAAAAAAAAAAAAAAAAAAAAAAAAAAAAAAAAAAAAAAAAA	NA06986,NA07346,NA07347,NA07357,NA10847,NA11894,NA11919,NA11992,NA11995,NA12003,NA12004,NA12005,NA12043,NA12044,NA12045,NA12144,NA12154,NA12249,NA12287,NA12414,NA12489,NA12716,NA12717,NA12749,NA12751,NA12761,NA12776,NA12828,NA18489,NA18498,NA18499,NA18501,NA18502,NA18504,NA18505,NA18507,NA18508,NA18510,NA18511,NA18516,NA18517,NA18519,NA18520,NA18522,NA18523,NA18526,NA18532,NA18537,NA18542,NA18545…
2	54970091	.	3	.	ALU	-	INS	P1_MEI_140&P2_MEI_488	293	RP|SR	lowcov+trio	val	PCR	CEU+YRI+CHB+JPT	0.30|0.26|0.07	55|42|51	33|22|7	.	.	.	14	72	95	MEI_SR,MEI_RP	80	GENE|EML6|ENSG00000214595			NA06986,NA07000,NA07037,NA07357,NA10847,NA11830,NA11881,NA11918,NA11920,NA11931,NA11992,NA11995,NA12003,NA12004,NA12006,NA12043,NA12044,NA12045,NA12144,NA12155,NA12156,NA12234,NA12287,NA12489,NA12717,NA12750,NA12751,NA12761,NA12763,NA12776,NA12812,NA12814,NA12872,NA12873,NA12891,NA18498,NA18499,NA18501,NA18508,NA18511,NA18517,NA18519,NA18522,NA18523,NA18526,NA18545,NA18638,NA18858,NA18861,NA18907…
2	55073048	.	23	.	L1	-	INS	P1_MEI_3429	.	SR	lowcov	NA	.	.	.|.|.	0|0|0	0|0|0	.	.	.	.	.	.	MEI_SR	3	GENE|RTN4|ENSG00000115310			NA11894
2	55937030	55937347	1	1	ALU	-	DEL	P1_M_061510_2_176&P2_M_061510_2_395	317	RP,SR	lowcov+trio	val	ASM	CEU+YRI+CHB+JPT	0.51|0.25|0.12	44|52|52	45|26|12	esv3738	.	.	16	.	.	pindel_D,bc_deletion,wtsi,broad,washu,PINDEL_SR,OXFDU_AS,WASHU_RP,BC_RP,YALEU_SR,UWASH_RP,YALEU_RD,WTSI_RP	.	.	AluYa5	TTTTTTTTTTTTTTTTTTTTTGAGACGGAGTCTCGCTCTGTCGCCCAGGCTGGAGTGCAGTGGCGGGATCTCGGCTCACTGCAAGCTCCGCCTCCCGGGTTCACGCCATTCTCCTGACTCAGCCTCCCAAGTAGCTGGGACTACAGGCGCCCGCCACTACGCCCGGCTAATTTTTTGTATTTTTAGTAGAGACGGGGTTTCACCGTTTTAGCCGGGATGGTCTCGATCTCCTGACCTCGTGATCCGCCCGCCTCGGCCTCCCAAAGTGCTGGGATTACAGGCGTGAGCCACCGCGCCCGGCC	NA06986,NA06994,NA07000,NA07037,NA07346,NA07347,NA10847,NA10851,NA11830,NA11831,NA11881,NA11894,NA11918,NA11931,NA11993,NA12003,NA12006,NA12043,NA12044,NA12045,NA12144,NA12156,NA12287,NA12716,NA12717,NA12751,NA12761,NA12763,NA12776,NA12813,NA12828,NA12878,NA12891,NA12892,NA18486,NA18489,NA18498,NA18499,NA18501,NA18502,NA18504,NA18505,NA18507,NA18508,NA18510,NA18511,NA18516,NA18517,NA18519,NA18520…
2	55954630	.	21	.	ALU	+	INS	P1_MEI_1484	295	RP	lowcov	NA	.	YRI+CHB+JPT	0.00|0.04|0.06	45|38|48	0|3|6	.	.	.	9	19	4	MEI_RP	40	GENE|EFEMP1|ENSG00000115380			NA18505,NA18516,NA18561,NA18562,NA18571,NA18576,NA18870,NA18961
2	56019206	.	33	.	ALU	-	INS	P2_MEI_1484	36	RP	trio	NA	.	.	.|.|.	0|0|0	0|0|0	.	.	.	.	9	8	MEI_RP	34	.			NA19238
2	56227020	.	5	.	ALU	+	INS	P1_MEI_141	304	SR|RP	lowcov	NA	.	CEU+YRI+CHB+JPT	0.19|0.06|0.41	51|41|48	19|5|39	.	.	.	15	76	64	MEI_SR,MEI_RP	40	.	AluY	GGCCGGGCGCGGTGGCTCACGCCTGTAATCCCAGCACTTTGGGAGGCCGGAGGCGGGGCCGGATCACGAGGGTCAGGAGATCGAGACCATCCTGGCTAACACGGTGAAACCCCGTCTCTACTAAAAATACAAAAAATTAGCCGGGCGTAGTGGCGGGCGCCTGTAGTCCCAGCTACTACGGGAAGGCTGAGGCAGGAGAATGGCGTGAACCCGGGAGGCGGAGCTTGCAGTGAGCCGAGATCGCGCCACTGCACTCCAGCCTGGGCGACAGAGCGAGACTCCGTCTAACAAAAAAAAAAAAAAAAAACAAAAAACAAAA	NA06986,NA07037,NA07347,NA07357,NA10847,NA10851,NA11831,NA11881,NA11919,NA11920,NA11993,NA12045,NA12154,NA12716,NA12828,NA12874,NA18511,NA18537,NA18542,NA18545,NA18547,NA18550,NA18552,NA18561,NA18563,NA18564,NA18566,NA18571,NA18573,NA18576,NA18582,NA18603,NA18605,NA18608,NA18638,NA18940,NA18942,NA18944,NA18945,NA18953,NA18956,NA18959,NA18960,NA18965,NA18973,NA19005,NA19093,NA19114,NA19257
2	56577234	56577412	1	1	ALU	+	DEL	P1_M_061510_2_177	178	RP,SR	lowcov	val	ASM	CEU+YRI+CHB+JPT	0.98|0.72|1.00	44|47|57	86|68|114	.	.	.	11	.	.	pindel_D,washu,bc_deletion,broad	.	.	AluYa5	AATTAGCCGGGCATAGTGGCGGGCGCCTGTAGTCCCAGCTACTTGGGAGGCTGAGGCAGGAGAATGGCGTGAACCCGGGAGGCGGAGCTTGCAGTGAGCCGAGATCCCGCCACTGCACTCCAGCCTGGGCGACAGAGCGAGACTCCGTCTCAAAAAAAAAAAAAAAAA	NA06994,NA07347,NA11829,NA11918,NA12045,NA12813,NA18486,NA18499,NA18502,NA18505,NA18507,NA18508,NA18511,NA18516,NA18519,NA18523,NA18532,NA18555,NA18609,NA18853,NA18856,NA18870,NA18912,NA18951,NA18953,NA18959,NA18960,NA18967,NA18971,NA18974,NA18975,NA18976,NA18980,NA18981,NA19098,NA19099,NA19102,NA19108,NA19116,NA19119,NA19129,NA19131,NA19137,NA19138,NA19144,NA19152,NA19159,NA19160,NA19171,NA19200…
2	56703614	56703937	1	1	ALU	-	DEL	P1_M_061510_2_929	323	SR,RP	lowcov	val	ASM	CEU+YRI	0.59|0.37|.	29|26|0	34|19|0	esv5927	.	.	15	.	.	wtsi,pindel_D	.	.	AluYk1	TTTTTTTTTTTTTTTTTTTTTTTTTTTTTGAGACGGAGTCTCACTCTTTCGCCCAAGCTGGACTGCAGTGGCGCTATCCCGGCTCACTGCAAGCTCCGCCTCTTGGGTTCATGCCATTCTCCTGCCTCAGCCTCCCGAGTAGCTGGGATTACAGGCGCCCACCACCACGCCCGGCTAATTTTTTGTATTTTTAGTAGAGACGGGGTTTCACCGTGTTAGCCAGGATGGTCTCGATCTCCTGACCTCGTGATCCGCCCGCCTCGGCCTCCCAAAGTGCTGGGATTACAGGCGTGAGCCACCGCGCCCGGC	NA07051,NA07346,NA10851,NA11829,NA11831,NA11918,NA11992,NA11994,NA12003,NA12004,NA12006,NA12154,NA12716,NA12717,NA12750,NA12751,NA12761,NA12763,NA12828,NA18486,NA18489,NA18501,NA18502,NA18505,NA18510,NA18511,NA18516,NA18520,NA18522,NA18550,NA18555,NA18558,NA18563,NA18566,NA18570,NA18572,NA18573,NA18576,NA18579,NA18592,NA18593,NA18603,NA18605,NA18638,NA18856,NA18871,NA18912,NA18944,NA18945,NA18960…
2	56726366	.	25	.	ALU	-	INS	P1_MEI_1485	87	RP	lowcov	NA	.	.	.|0.00|0.00	0|30|37	0|0|0	.	.	.	15	2	7	MEI_RP	18	.			NA07037,NA11831,NA12044,NA12751
2	56825182	.	10	.	ALU	+	INS	P1_MEI_3430	.	SR	lowcov	NA	.	.	0.00|.|.	12|0|0	0|0|0	.	.	.	.	0	2	MEI_SR	5	.			NA19141,NA19141
2	57101452	.	1	.	ALU	-	INS	P1_MEI_142&P2_MEI_2293	301	RP|SR	lowcov+trio	NA	.	.	.|.|.	0|0|0	0|0|0	.	.	.	13	33	45	MEI_SR,MEI_RP	58	.	AluYb8	TTCTTTTTTTTTTTTTTTTTTTTTTTTTTTGTAGACGGAGTCTCGCTCTGTCGCCCAGGCAGGACTGCGGACTGCAGTGGCGCAATCTCGGCTCACTGCAAGCTCCGCTTCCCGGGTTCACGCCATTCTCCTGCCTTCTTTAGTTCCTCCCGAGTAGCTGGGACTACAGGCCGCCCGCCACCGCCGCCCGGCTAATTTTTTTTTTGTATTTTTAGTAGAGACGGGGTTTCACCTTGTTAGCCAGGATGGTCTCGATCTCCTGACCTCATGATCCACCCGCCTCGGCCTCCCAAAGTGCTGGGATTACAGGCGTGAGCCACCGCCGCCCGGCC	NA07000,NA11918,NA11920,NA11992,NA11994,NA11995,NA12006,NA12043,NA12144,NA12154,NA12249,NA12716,NA12717,NA12763,NA12814,NA12873,NA12878,NA18489,NA18508,NA18516,NA18519,NA18522,NA18526,NA18537,NA18550,NA18561,NA18563,NA18570,NA18571,NA18573,NA18576,NA18579,NA18582,NA18593,NA18608,NA18609,NA18638,NA18858,NA18870,NA18871,NA18909,NA18951,NA18953,NA18956,NA18960,NA18961,NA18964,NA18965,NA19093,NA19099…
2	57196233	57196560	1	1	ALU	-	DEL	P1_M_061510_2_178&P2_M_061510_2_396	327	SR,AS,RP	lowcov+trio	val	ASM	CEU+YRI+CHB+JPT	0.27|0.04|0.25	33|41|53	18|3|26	esv4618	.	.	14	.	.	wtsi,bc_deletion,washu,pindel_D,broad,WTSI_RP,OXFDU_AS,BC_RP,UWASH_RP,PINDEL_SR,YALEU_SR,WASHU_RP	.	.	AluYb8	TTTTTTTTTTTTTTTTTTTTTTTTTTGAGACGGAGTCTCGCTCTGTCGCCCAGGTCGGACTGCGGACTGCAGTGGCGCAATCTCGGCTCACTGCAAGCTCCGCTTCCCGGGTTCACGCCATTCTCCTGCCTCAGCCTCCCGAGTAGCTGGGACTACAGGCGCCCGCCACCGCGCCCGGCTAATTTTTTGTATTTTTAGTAGAGACGGGGTTTCACCTTGTTAGCCAGGATGGTCTCGATCTCCTGACCTCATGATCCACCCGCCTCGGCCTCCCAAAGTGCTGGGATTACAGGCGTGAGCCACCGCGCCCGGCC	NA06986,NA06994,NA07000,NA07037,NA07051,NA07346,NA07347,NA10847,NA10851,NA11829,NA11830,NA11881,NA11894,NA11918,NA11919,NA11920,NA11931,NA11992,NA11993,NA11994,NA11995,NA12003,NA12004,NA12006,NA12043,NA12044,NA12045,NA12144,NA12154,NA12155,NA12156,NA12249,NA12287,NA12414,NA12489,NA12716,NA12717,NA12749,NA12750,NA12751,NA12761,NA12763,NA12776,NA12813,NA12828,NA12878,NA12891,NA12892,NA18486,NA18489…
2	57304547	.	1	.	ALU	-	INS	P1_MEI_143	305	SR|RP	lowcov	NA	.	CEU+CHB+JPT	0.10|0.00|0.10	49|38|45	10|0|9	.	.	.	17	15	27	MEI_SR,MEI_RP	40	.			NA11840,NA11918,NA11919,NA11920,NA11992,NA12154,NA12234,NA12489,NA12750,NA12763,NA12872,NA12874,NA18555,NA18561,NA18571,NA18592,NA18609,NA18943,NA18960
2	57830793	.	20	.	ALU	-	INS	P1_MEI_1486	245	RP	lowcov	NA	.	YRI	0.00|0.09|0.00	37|33|42	0|6|0	.	.	.	4	2	8	MEI_RP	20	.			NA18501,NA18502,NA18508,NA18519,NA19129
2	57984023	.	10	.	ALU	+	INS	P1_MEI_3431	.	SR	lowcov	NA	.	CEU	0.07|.|.	15|0|0	2|0|0	.	.	.	.	0	1	MEI_SR	4	.			NA12249
2	58392807	58393132	1	1	ALU	+	DEL	P1_M_061510_2_181	325	RP,SR	lowcov	val	ASM	CEU+YRI+CHB+JPT	0.98|0.88|0.93	41|43|57	80|76|106	.	.	.	14	.	.	pindel_D,broad,washu,bc_deletion,wtsi	.	.	AluYb8	AGGCCGGGCGCGGTGGCTCACGCCTGTAATCCCAGCACTTTGGGAGGCCGAGGCGGATGGATCATGAGGTCAGGAGATCGAGACCATCCTGGCTAACAAGGTGAAACCCCGTCTCTACTAAAAATACAAAAAATTAGCCGGGTGCGGTGGCGGGCGCCTGTAGTCCCAGCTACTCGGGAGGCTGAGGCAGGAGAATGGCGTGAACCCGGGAAGCGGAGCTTGCAGTGAGCCGAGATTGCGCCACTGCAGTCCGCAGTCCGGCCTGGGCAACAGAGCGAGACTCCGTCTCAAAAAAAAAAAAAAAAAAAAAAA	NA06994,NA07347,NA11830,NA11894,NA11993,NA11994,NA12004,NA12044,NA12144,NA12154,NA12763,NA12813,NA18486,NA18501,NA18504,NA18511,NA18519,NA18520,NA18545,NA18577,NA18593,NA18853,NA18856,NA18858,NA18870,NA18871,NA18912,NA18943,NA18947,NA18949,NA18951,NA18953,NA18956,NA18967,NA18968,NA18971,NA18972,NA18974,NA18975,NA18980,NA18981,NA19098,NA19116,NA19119,NA19131,NA19137,NA19138,NA19152,NA19153,NA19159…
2	59067237	.	46	.	ALU	+	INS	P1_MEI_1487	224	RP	lowcov	NA	.	.	0.00|.|0.00	41|0|42	0|0|0	.	.	.	.	8	5	MEI_RP	25	GENE|AC007092.1|ENSG00000233723			NA18502,NA18519,NA18856,NA19093,NA19114,NA19138
2	59523463	.	5	.	ALU	+	INS	P1_MEI_3432	296	SR	lowcov	NA	.	CEU	0.06|.|.	16|0|0	2|0|0	.	.	.	13	1	2	MEI_SR	17	GENE|AC007131.4|ENSG00000233891			NA11894,NA11894
2	59656106	.	8	.	ALU	+	INS	P1_MEI_3433&P2_MEI_1485	231	RP|SR	lowcov+trio	NA	.	CEU	0.06|.|.	16|0|0	2|0|0	.	.	.	9	0	3	MEI_SR,MEI_RP	44	GENE|AC007131.4|ENSG00000233891			NA12045,NA19238,NA19240
2	59727752	.	1	.	ALU	+	INS	P1_MEI_144&P2_MEI_1486	207	RP|SR	lowcov+trio	NA	.	YRI+CHB+JPT	.|0.07|0.08	0|38|46	0|5|7	.	.	.	27	37	35	MEI_SR,MEI_RP	80	GENE|AC007131.4|ENSG00000233891	AluYb8	GAGACCCATCCTGGCTAACAAGGTGAAACCCCGTCTCTACTAAAAATACAAAAATTAGCCGGGCGTGGTGGCGGGCGCCTGTAGTCCCAGCTACTCGGGAGGCTGAGGCAGGAGAATGGCGTGAACCCGGGAAGCGGAGCTTGCAGTGAGCCGAGATTGCGCCACTGCAGTCCGCAGTCCGGCCTGGGCAACAGAGCGAGACTCCGTCTCAAAAAAAAAAAAAAAAGAAAA	NA07346,NA07347,NA11831,NA11881,NA11894,NA12004,NA12006,NA12043,NA12045,NA12144,NA12155,NA12249,NA12717,NA12749,NA12763,NA18505,NA18522,NA18555,NA18572,NA18609,NA18956,NA18969,NA18970,NA18973,NA18980,NA19147,NA19239
2	59951215	.	23	.	L1	-	INS	P1_MEI_3434	.	SR	lowcov	NA	.	.	.|.|.	0|0|0	0|0|0	.	.	.	.	.	.	MEI_SR	3	.			NA11894
2	60051398	60051713	53	40	ALU	+	DEL	P1_M_061510_2_183	315	RP	lowcov	NA	.	.	.|.|.	0|0|0	0|0|0	.	.	.	.	.	.	bc_deletion	.	.	AluYa5	TGCCCAGACCTCGCGGTGGCTCACGCCTGTAATCCCAGCACTTTGGGAGGCCGAGGCGGGCGGATCACGAGGTCAGGAGATCGAGACCATCCCAGCTAAAACGGTGAAACCCCGTCTCTACTAAAAATACAAAAAATTAGCCGGGTGTAGTGGCGGGCGCCTGTAGTCCCAGCTACTTGGGAGGCTGAGGCAGGAGAATGGCGTGAACCCGGGAGGCGGAGCTTGCAGTGAGCCGAGATCCCGCCACTGCACTCCAGCCTGGGCGACAGAGCGAGACTCTGTCTCAAAAAAAAAAAAAAAAAAAAAAAAAAAAAAT	NA07037,NA11830,NA12414,NA12489
2	62003613	.	10	.	ALU	+	INS	P1_MEI_3435	.	SR	lowcov	NA	.	CEU	0.07|.|.	15|0|0	2|0|0	.	.	.	.	0	2	MEI_SR	5	GENE|COMMD1|ENSG00000173163			NA12249,NA12249
2	62310603	62310930	1	1	ALU	-	DEL	P1_M_061510_2_1101	327	RP	lowcov	val	ASM	CEU+YRI+CHB+JPT	0.94|0.92|0.88	34|44|32	64|81|56	.	.	.	10	.	.	wtsi	.	GENE|AC093401.5|ENSG00000237488	AluYb8	TTTTTTTTTTTTTTTTTTTTTTTTTTTTTTGAGACGGAGTGTCGCTCTGTCGCCCAGGTCGGACTGCGGACTGCAGTGGCGCAATCTCGGCTCACTGCAAGCTCCGCTTCCCGGGTTCACGCCATTCTCCTGCCTCAGCCTCCCGAGTGGCTGGGACTACAGGCGCCCGCCACCGCGCCCGGCTAATTTTTTGTATTTTTAGTAGAGACGGGGTTTCACCTTGTTAGCCAGGATGGTCTCGATCTCCTGACCTCATGATCCACCCGCCTCGGCCTCCCAAAGTGCTGGGATTACAGGCGTGAGCCACCGCGCCCGGCC	NA12045,NA12750,NA18501,NA18519,NA18949,NA18951,NA19240
2	62355396	.	7	.	ALU	-	INS	P1_MEI_1488&P2_MEI_1487	137	RP	lowcov+trio	NA	.	YRI	.|0.45|.	0|29|0	0|26|0	.	.	.	20	31	87	MEI_RP	80	.			NA06986,NA07000,NA07346,NA10851,NA11830,NA11831,NA11881,NA11918,NA11931,NA11992,NA11993,NA11995,NA12003,NA12006,NA12144,NA12287,NA12414,NA12717,NA12751,NA12761,NA12763,NA18499,NA18501,NA18505,NA18519,NA18522,NA18523,NA18526,NA18545,NA18547,NA18550,NA18552,NA18555,NA18561,NA18563,NA18564,NA18566,NA18571,NA18572,NA18576,NA18579,NA18592,NA18593,NA18608,NA18609,NA18638,NA18853,NA18856,NA18870,NA18871…
2	62517906	.	97	.	ALU	+	INS	P1_MEI_1489	44	RP	lowcov	NA	.	.	.|.|.	0|0|0	0|0|0	.	.	.	.	14	3	MEI_RP	34	.			NA11931,NA12006,NA12044,NA12414,NA12489,NA18507,NA18523,NA18861,NA18916,NA18951,NA18952,NA18956,NA19005,NA19108
2	63819014	.	7	.	ALU	-	INS	P1_MEI_1490&P2_MEI_1488	97	RP	lowcov+trio	NA	.	YRI+CHB+JPT	.|0.11|0.02	0|42|48	0|9|2	.	.	.	17	27	43	MEI_RP	56	GENE|C2orf86|ENSG00000143951			NA06986,NA07347,NA07357,NA11831,NA11918,NA12144,NA12249,NA12287,NA12749,NA12750,NA12761,NA12828,NA18520,NA18523,NA18861,NA18907,NA18909,NA18916,NA18951,NA18964,NA19108,NA19116,NA19238
2	64485844	.	71	.	ALU	+	INS	P1_MEI_1491	89	RP	lowcov	NA	.	.	.|.|.	0|0|0	0|0|0	.	.	.	.	51	5	MEI_RP	40	GENE|AC114752.2|ENSG00000223935			NA07346,NA10851,NA11831,NA11894,NA11931,NA11993,NA12154,NA12287,NA12749,NA12776,NA18489,NA18499,NA18505,NA18508,NA18510,NA18522,NA18523,NA18545,NA18577,NA18638,NA18861,NA18916,NA18942,NA18943,NA18945,NA18948,NA18951,NA18956,NA18965,NA19093,NA19108,NA19114,NA19129,NA19225
2	64625286	.	19	.	ALU	+	INS	P1_MEI_1492	292	RP	lowcov	NA	.	YRI+CHB+JPT	0.00|0.07|0.02	42|40|48	0|6|2	.	.	.	3	8	13	MEI_RP	40	GENE|AFTPH|ENSG00000119844			NA18489,NA18508,NA18517,NA18555,NA18858,NA18948,NA19138,NA19172
2	65017271	.	1	.	ALU	-	INS	P1_MEI_3436&P2_MEI_489	294	RP|SR	lowcov+trio	val	PCR	CEU	0.27|.|.	15|0|0	8|0|0	.	.	.	15	8	3	MEI_SR,MEI_RP	66	.	AluYf4	TTTTTTTTTTTTTTTTTTTTTTTTGTAGACGGAGTCTCGCTGTCGCCCAGGCTGGAGTGCAGTGGCGCAATCTCGGCTCACTGCAGGCTCCGCCCCCCTGGGGTTCACGCCATTCTCCTGCCTCAGCCTTCCCGAGTAGCTGGGACTACAGGCGCCCGCCACCTCGCCCGGCTAATTTTTTGTATTTTTAGTAGAGACGGGGTTTCACCGTGTTAGCCAGGATGGTCTCGAACTCCTGACCTCGTGATCCACCCGCCTCGGCCTCCCAAAGTGCTGGGATTACAGGCGTGAGCCACCGCGCCCGGCC	NA07347,NA11840,NA12249,NA12287,NA12872,NA12878,NA12891
2	65187278	.	1	.	ALU	+	INS	P1_MEI_3437&P2_MEI_2295	306	SR	lowcov+trio	NA	.	CEU	0.83|.|.	15|0|0	25|0|0	.	.	Xing|GR2009|1104685777384	27	2	36	MEI_SR	71	GENE|RAB1A|ENSG00000138069	AluYc	GGCCGGGGCGCGGTGGCTCACGCCTGTAATCCCAGCACTTTGGGAGGCCGAGGGCGGGCGGATCACGAGGTCAGGAGATCGAGACCAAGGTGAAACCCCGTCTCTACTAAAAAATACGAAAAGTTAGCCGGGCGTAGTGGCGGGCGGCCTGTTAGTCCCAGCTACTCGGGAGGCTGAGGCAGGAGAATGGCGTGAACCCGGGAGGCGGAGCTTGCAGTGAGCCGAGATCGCGCCACTGCACTCCAGCCTGGGTGACAGAGCGAGACTCCGTCTCAAAAAAAAAAAAAAAAAAA	NA07346,NA11840,NA11894,NA11918,NA11931,NA12043,NA12249,NA12287,NA12812,NA12814,NA12872,NA12873,NA12874,NA12878,NA19240
2	65599958	.	13	.	SVA	+	INS	P1_MEI_1493&P2_MEI_1489	1590	RP	lowcov+trio	val	PCR	CEU+YRI	0.10|0.09|.	44|41|0	9|7|0	.	.	.	12	5	27	MEI_RP	80	GENE|AC074391.2|ENSG00000204929			NA07037,NA10847,NA11993,NA12003,NA12004,NA12154,NA12249,NA12717,NA12878,NA12891,NA12892,NA18510,NA18519,NA18523,NA18558,NA18561,NA18570,NA18572,NA18576,NA18577,NA18579,NA18582,NA18952,NA18960,NA18965,NA19138,NA19238,NA19240
2	65661011	65661321	1	1	ALU	-	DEL	P1_M_061510_2_187&P2_M_061510_2_407	310	AS,SR,RP	lowcov+trio	val	ASM	CEU+YRI+CHB+JPT	0.15|0.17|0.38	44|49|54	13|17|41	esv7841	.	.	12	.	.	bc_deletion,wtsi,broad,washu,BC_RP,WASHU_RP,WTSI_RP,YALEU_SR,UWASH_RP,OXFDU_AS	.	GENE|AC074391.2|ENSG00000204929	AluYf4	TTTTTTTTTTTTTTTTTTTGAGACGGAGTCTCGCTGTCGCCCAGGCTGGAGTGCAGTGGCGCAATCTCGGCTCACTGCAGGCTCCGCCCCCTGGGGTTCACGCCATTCTCCTGCCTCAGCCTCCCGAGTAGCTGGGACTACAGGCGCCTGCCACCTCGCCCGGCTAATTTTTTGTATTTTTAGTAGAGACAGGGTTTCACCGTGTTAGCCAGGATGGTCTCGATCTCCTGACCTCGTGATCCGCCCGCCTCGGCCTCCCAAAGTGCTGGGATTACAGGCGTGAGCCACCGCGCCCGGCC	NA06986,NA06994,NA07000,NA07037,NA07051,NA07346,NA07347,NA10847,NA10851,NA11829,NA11830,NA11831,NA11881,NA11894,NA11918,NA11919,NA11920,NA11931,NA11993,NA11995,NA12003,NA12004,NA12006,NA12043,NA12044,NA12045,NA12154,NA12155,NA12156,NA12249,NA12287,NA12414,NA12489,NA12716,NA12717,NA12749,NA12750,NA12751,NA12761,NA12763,NA12776,NA12813,NA12828,NA12878,NA12891,NA12892,NA18486,NA18489,NA18498,NA18499…
2	66512481	.	4	.	ALU	+	INS	P1_MEI_145&P2_MEI_490	227	RP|SR	lowcov+trio	val	PCR	CEU+YRI	0.50|0.44|.	54|43|0	54|38|0	.	.	Xing|GR2009|1104685777770	13	178	90	MEI_SR,MEI_RP	80	GENE|AC092669.3|ENSG00000226819			NA06986,NA07000,NA07051,NA07346,NA07347,NA07357,NA10847,NA10851,NA11830,NA11831,NA11840,NA11881,NA11894,NA11918,NA11919,NA11931,NA11992,NA11993,NA11994,NA11995,NA12004,NA12006,NA12043,NA12044,NA12045,NA12144,NA12154,NA12155,NA12234,NA12249,NA12287,NA12414,NA12716,NA12749,NA12750,NA12751,NA12761,NA12763,NA12776,NA12814,NA12815,NA12828,NA12872,NA12873,NA12874,NA12878,NA12891,NA12892,NA18489,NA18498…
2	66717695	.	10	.	ALU	+	INS	P1_MEI_3438	.	SR	lowcov	NA	.	.	0.00|.|.	16|0|0	0|0|0	.	.	.	.	0	1	MEI_SR	4	GENE|AC009474.2|ENSG00000232046			NA19141
2	66916008	.	91	.	ALU	-	INS	P1_MEI_1494	245	RP	lowcov	NA	.	CEU	0.05|0.00|0.00	44|38|46	4|0|0	.	.	.	.	3	5	MEI_RP	16	.			NA07357,NA11995,NA12763
2	67672720	.	10	.	ALU	+	INS	P1_MEI_3439&P2_MEI_1491	212	RP|SR	lowcov+trio	NA	.	CEU	0.03|.|.	15|0|0	1|0|0	.	.	.	.	0	3	MEI_SR,MEI_RP	33	GENE|AC007422.1|ENSG00000235495			NA12234,NA18969,NA19238,NA19240
2	67902726	.	17	.	L1	-	INS	P1_MEI_1495	6026	RP	lowcov	NA	.	YRI	0.00|0.12|0.00	42|41|45	0|10|0	.	.	.	19	2	9	MEI_RP	21	GENE|AC010987.1|ENSG00000237013			NA18498,NA18508,NA18516,NA18522,NA18871,NA18909,NA19108,NA19257
2	67996570	.	5	.	ALU	+	INS	P1_MEI_1496&P2_MEI_491	282	RP|SR	lowcov+trio	val	PCR	YRI	0.00|0.15|0.00	43|43|49	0|13|0	.	.	.	17	19	13	MEI_SR,MEI_RP	80	.	AluY	GGCCGGGCGCGGTGGCTCACGCCTGTAATCCCAGCACTTTGGGAGGCCGAGGCGGGCGGATCACGAGGTCAGGAGATCGAGACCATCCTGGCTAACACGGTGAAACCCCGCCTCTACTAAAAATACAAAAAATTAGCCGGGCGTGGTGGCGGGCGCCTGTAGTCCCAGCTACTCGGGAGGCTGAGGCAGGAGAATGGCGTGAACCCGGGAGGCGGAGCTTGCAGTGAGCCGAGATCGCGCCACTGCACTCCAGCCTGGGCGACAGAGCGAGACTCCGTCTACAAAAAAAAAAAAAAAAAAANAAAAAAAAA	NA18501,NA18504,NA18517,NA18522,NA18858,NA18916,NA19099,NA19138,NA19238,NA19239,NA19240
2	68259126	.	33	.	ALU	-	INS	P1_MEI_1497	58	RP	lowcov	NA	.	YRI	0.00|0.13|0.00	42|39|47	0|10|0	.	.	.	.	6	13	MEI_RP	38	GENE|PPP3R1|ENSG00000221823			NA18504,NA18508,NA18519,NA18861,NA19093,NA19099,NA19114,NA19225
2	68501712	.	14	.	ALU	-	INS	P1_MEI_1498	286	RP	lowcov	NA	.	YRI+CHB+JPT	0.00|0.13|0.03	43|42|49	0|11|3	.	.	.	3	13	28	MEI_RP	40	.			NA18502,NA18510,NA18519,NA18564,NA18870,NA18871,NA18912,NA18959,NA18964,NA19093,NA19116,NA19147,NA19257
2	68586913	.	3	.	ALU	-	INS	P1_MEI_1499&P2_MEI_492	298	RP|SR	lowcov+trio	NA	.	CEU	0.02|.|0.00	46|0|48	2|0|0	.	.	.	13	22	51	MEI_SR,MEI_RP	80	GENE|APLF|ENSG00000169621	AluYb8	ACGGAGTCTCGCTCTGTCGCCCAGGCCGGACTGCGGACTGCAGTGGCGCAATCTCGGCTCACTGCAAGCTCCGCTTCCCGGGTTCACGCCATTCTCCTGCCTCAGCCTCCCGAGTAGCTGGGACTACAGGCGCCCGCCACCGCGCCCGGCTAATTTTTTGTATTTTTAGTAGAGACGGGGTTTCACCTTGTTAGCCAGGATGGTCTCGATCTCCTGACCTCATGATCCACCCGCCTCGGCCTCCCAAAGTGCTGGGATTACAGGCGTGAGCCACCGCGCCCGGCC	NA12006,NA12828,NA18498,NA18502,NA18504,NA18505,NA18510,NA18516,NA18517,NA18519,NA18523,NA18853,NA18856,NA18861,NA18870,NA18871,NA18907,NA18912,NA19093,NA19099,NA19102,NA19114,NA19116,NA19137,NA19138,NA19147,NA19190,NA19225,NA19238,NA19239,NA19240,NA19257
2	69598162	.	10	.	ALU	-	INS	P1_MEI_3440	.	SR	lowcov	NA	.	CEU	0.14|.|.	14|0|0	4|0|0	.	.	.	.	3	0	MEI_SR	7	GENE|AAK1|ENSG00000115977			NA07347,NA11840,NA12234
2	70651207	.	1	.	ALU	-	INS	P1_MEI_146	297	SR|RP	lowcov	NA	.	CEU+YRI	0.28|0.05|.	50|39|0	28|4|0	.	.	Xing|GR2009|1104685778816	18	61	84	MEI_SR,MEI_RP	40	.	AluYa5	TTTTTTTTTTTTTTTTTTTTTTTTTGTAGACGGAGTCTCGCTCTGTCGGCCCAGGCTGGAGTGCAGTGGCGGGATCTCGGCTCACTGCAAGCTCCGCCTCCCGGGTTCACGCCATTCTCCTGCCTCAGCCTCCCAAGTAGCTGGGACTACAGGCCGCCCCGCCACTACGCCCGGCTAATTTTTTTGTATTTTTAGTAGAGACGGGGTTTCACCGTTTTAGCCGGGATGGTCTCGATCTCCTGACCTCGTGATCCGCCCGCCTCGGCCTCCCAAAGTGCTGGGATTACAGGCGTGAGCCACCGCGCCCGGCC	NA07000,NA07051,NA07357,NA10847,NA10851,NA11830,NA11840,NA11881,NA11894,NA11994,NA11995,NA12003,NA12006,NA12043,NA12044,NA12144,NA12154,NA12156,NA12249,NA12717,NA12763,NA12776,NA12814,NA12828,NA12874,NA18502,NA18516,NA18526,NA18542,NA18547,NA18550,NA18552,NA18558,NA18561,NA18562,NA18564,NA18573,NA18576,NA18577,NA18579,NA18592,NA18608,NA18638,NA18943,NA18945,NA18947,NA18960,NA18965,NA19005,NA19129…
2	71559794	.	5	.	ALU	+	INS	P1_MEI_1500&P2_MEI_1492	160	RP	lowcov+trio	NA	.	CEU+YRI+CHB+JPT	0.35|0.12|0.20	42|42|50	29|10|20	.	.	.	16	71	38	MEI_RP	80	GENE|DYSF|ENSG00000135636			NA07051,NA07357,NA10847,NA11894,NA11919,NA11920,NA11931,NA11993,NA12006,NA12043,NA12045,NA12154,NA12249,NA12287,NA12489,NA12716,NA12717,NA12750,NA12751,NA12761,NA12763,NA12878,NA12891,NA18498,NA18499,NA18501,NA18508,NA18511,NA18523,NA18562,NA18570,NA18593,NA18856,NA18858,NA18909,NA18940,NA18942,NA18944,NA18947,NA18949,NA18951,NA18952,NA18956,NA18959,NA18965,NA18973,NA18980
2	73284439	73284751	1	1	ALU	+	DEL	P1_M_061510_2_596&P2_M_061510_2_676	312	SR,RP	lowcov+trio	val	ASM	CEU+YRI+CHB+JPT	0.81|0.50|0.97	44|51|57	71|51|111	.	.	.	15	.	.	broad,wtsi,pindel_D,UWASH_RP,YALEU_SR	.	GENE|NOTO|ENSG00000214513	AluYg6	TGGCCGGGCGCGGTGGCTCACGCCTGTAATCCCAGCACTTTGGGAGGCCGAGACGGGCGGATCACGAGGTCAGGAGATCGAGACCATCCTGGCTAACACGGTGAAACCCCGTCTCTACTAAAAATACAAAAATTAGCCGGGCATGGTGGCGCGTGCCTGTAGTCCCAGCTACACAGGAGGCTGAGGCAGGAGAATGGCGTGAACCCGGGAGGCGGAGCTTGCAGTGAGTCGAGATCGCGCCACTGCACTCCAGCCTGGGCGACAGAGCGAAACTCCGTCTCAAAAAAAAAAAAAAAAA	NA06994,NA11829,NA11830,NA11831,NA11918,NA11919,NA11993,NA11994,NA11995,NA12006,NA12044,NA12045,NA12249,NA12287,NA12414,NA12489,NA12717,NA12749,NA12813,NA12878,NA12891,NA18486,NA18489,NA18498,NA18499,NA18501,NA18502,NA18504,NA18505,NA18507,NA18508,NA18510,NA18516,NA18517,NA18520,NA18523,NA18558,NA18561,NA18582,NA18593,NA18603,NA18609,NA18853,NA18856,NA18858,NA18861,NA18870,NA18871,NA18909,NA18940…
2	73577216	.	9	.	ALU	+	INS	P1_MEI_147	296	SR|RP	lowcov	NA	.	.	.|0.00|0.00	0|32|38	0|0|0	.	.	.	17	10	13	MEI_SR,MEI_RP	40	GENE|ALMS1|ENSG00000116127			NA07051,NA11840,NA11931,NA12003,NA12749,NA12776
2	73940669	.	29	.	L1	-	INS	P1_MEI_1501	3688	RP	lowcov	NA	.	YRI+CHB+JPT	0.00|0.09|0.01	42|39|47	0|7|1	.	.	.	.	8	16	MEI_RP	40	GENE|STAMBP|ENSG00000124356			NA18489,NA18508,NA18511,NA18523,NA18576,NA19108,NA19137,NA19138
2	73978987	.	1	.	ALU	-	INS	P1_MEI_3441&P2_MEI_2296	313	SR	lowcov+trio	val	PCR	CEU	0.77|.|.	13|0|0	20|0|0	.	dbRIP_Alu_00202	.	34	25	2	MEI_SR	57	GENE|ACTG2|ENSG00000163017	AluYa5	TTTTTTTTTTTNTTTTTTTTTTTTTTTTTGAGACGGAGTCTCGCTCTGTCGCCCAGGCTGGAGTGCAGTGGCGCAATCTCGGCTCACTGCAAGCCTCCGCCTCCCGGGTTCACGCCATTCTCCTGCCTCAGCCTCCCAAGTAGCTGGGACTACAGGCGCCCGCCACTACGCCCGGCCTAATTTTTTTGTATTTTTTAGTAGAGACGGGGGTTTCACCGTTTTTAGCCGGGGATGGTCTCGATCTCCTGACCTCGTGATCCGCCCGCCCTCGGCCTCCCAAAGTGCTGGGATTACAGGCGTGAGCCACCGCGCCCGGCC	NA07346,NA11840,NA11881,NA11918,NA12045,NA12234,NA12249,NA12812,NA12814,NA12815,NA12872,NA12874,NA12878
2	74364784	74365114	1	1	ALU	-	DEL	P1_M_061510_2_205&P2_M_061510_2_418	330	RP,SR	lowcov+trio	val	ASM	CEU+YRI+CHB+JPT	0.85|0.25|0.18	42|52|30	71|26|11	esv7786	.	.	14	.	.	pindel_D,bc_deletion,wtsi,washu,BC_RP,UWASH_RP,WASHU_RP,YALEU_SR,PINDEL_SR,WTSI_RP	.	GENE|SLC4A5|ENSG00000188687	AluYb8	TTTTTTTTTTTTTTTTTTTTTTTTTGAGACGGAGTCTCGCTCTGTCGCCCAGGTCGGACTGCGGACTGCAGTGGCGCAATCTCGGCTCACTGCAAGCTCCGCTTCCCGGGTTCACGCCATTCTCCTGCCTCAGCCTCCCGAGTAGCTGGGACTACAGGCGCCCGCCACCGCGCCCGGCTAATTTTTTTTTTGTATTTTTAGTAGAGACGGGGTTTCACCTTGTTAGCCAGGATGGTCTCGATCTCCTGACCTCATGATCCACCCGCCTCGGCCTCCCAAAGTGCTGGGATTACAGGCGTGAGCCACCGCGCCCGGCC	NA06986,NA07037,NA07346,NA10847,NA11881,NA12249,NA12716,NA12750,NA12761,NA12763,NA12878,NA12892,NA18486,NA18498,NA18499,NA18501,NA18504,NA18505,NA18508,NA18516,NA18517,NA18519,NA18520,NA18522,NA18523,NA18526,NA18545,NA18547,NA18550,NA18552,NA18555,NA18558,NA18562,NA18564,NA18566,NA18571,NA18572,NA18573,NA18577,NA18579,NA18582,NA18592,NA18593,NA18603,NA18608,NA18609,NA18638,NA18858,NA18861,NA18870…
2	75241398	.	1	.	ALU	+	INS	P1_MEI_148&P2_MEI_493	291	RP|SR	lowcov+trio	NA	.	CEU+YRI+CHB+JPT	0.35|0.39|0.42	54|46|48	38|36|40	.	.	Xing|GR2009|1104685779790	12	137	134	MEI_SR,MEI_RP	80	GENE|TACR1|ENSG00000115353	AluY	GGCCGGGCGCGGTGGCTCACGCCTGTAATCCCAGCACTTTTGGGAGGCCGAGGCGGGCGGATCACGAGGTCAGGAGATCGAGACCATCCTGGCTAACACGGTGAAAACCCCCGTCTCTACTAAAAATACAAAAAATTAGCCGGGCGTGGTAGCGGGCGCCTGTAGTCCCAGCTACTCGGGAAGGCTGAGGCAGGAGAATGGCGTGAACCCGGGAGGCGGAGCTTGCAGTGAGCCGAGATCGCGCCACTGCACTCCAGCCTGGGCGACAGAGCCGAGACTACCGTCTACAAAAAAAAAAAAAAAAAAAAAAAAAGAAA	NA06986,NA07000,NA07037,NA07051,NA07346,NA07347,NA07357,NA10847,NA10851,NA11831,NA11840,NA11894,NA11920,NA11992,NA11993,NA12003,NA12004,NA12045,NA12154,NA12249,NA12287,NA12414,NA12489,NA12716,NA12749,NA12750,NA12751,NA12761,NA12776,NA12814,NA12872,NA12873,NA12878,NA12891,NA18489,NA18498,NA18507,NA18508,NA18511,NA18517,NA18519,NA18522,NA18526,NA18537,NA18542,NA18550,NA18552,NA18555,NA18561,NA18564…
2	75656866	75657188	1	1	ALU	-	DEL	P1_M_061510_2_207	322	RP	lowcov	val	ASM	CEU+YRI+CHB+JPT	1.00|0.89|1.00	44|40|57	88|71|114	.	.	.	16	.	.	bc_deletion,wtsi	.	.	AluY	TTTTTTTTTTTTTTTTTTTTTTTTTTTGAGACGGAGTCTCGCTCTGTCGCCCAGGCTGGAGTGCAGTGGCGCAATCTCGGCTCACTGCAAGCTCCGCCTCCCGGGTTCACGCCATTCTCCTGCCTCAGCCTCCCGAGTAGCTGGGACTACAGGCGCCCGCCACTACGCCCGGCTAATTTTTTGTATTTTTAGTAGAGACGGGGTTTCACCGTGTTAGCCAGGATGGTCTCGATCTCCTGACCTCGTGATCCGCCCGCCTCGGCCTCCCAAAGTGCTGGGATTACAGGCGTGAGCCACCGCGCCCGGC	NA18489,NA18501,NA18504,NA18523,NA18871,NA18907,NA19102,NA19114
2	76003699	.	14	.	ALU	-	INS	P1_MEI_1502	247	RP	lowcov	NA	.	CHB+JPT	.|0.00|0.04	0|31|39	0|0|3	.	.	.	10	4	11	MEI_RP	30	.			NA10851,NA11918,NA12004,NA12043,NA18571,NA18609
2	76111217	.	22	.	ALU	-	INS	P1_MEI_1503	152	RP	lowcov	NA	.	.	.|0.00|0.00	0|20|27	0|0|0	.	.	.	.	3	14	MEI_RP	34	.			NA07051,NA07357,NA11829,NA11831,NA11918,NA12414,NA12750
2	76707805	.	72	.	ALU	-	INS	P2_MEI_1493	118	RP	trio	val	PCR	.	.|.|.	0|0|0	0|0|0	.	.	.	.	5	14	MEI_RP	38	.			NA19238,NA19239
2	77830275	77830599	1	1	ALU	+	DEL	P1_M_061510_2_212&P2_M_061510_2_423	324	RP	lowcov+trio	val	ASM	CEU+YRI+CHB+JPT	0.81|0.52|0.55	43|45|56	70|47|62	esv5213	.	.	17	.	.	wtsi,broad,washu,bc_deletion,WTSI_RP,UWASH_RP,BC_RP,WASHU_RP	.	.	AluYa5	TGGCCGGGCGCGGTGGCTCACGCCTGTAATCCCAGCACTTTGGGAGGCCGAGGCGGGCGGATCACGAGGTCAGGAGATCGAGACCATCCCGGCTAAAACGGTGAAACCCCGTCTCTACTAAAAATACAAAAAATTAGCCGGGCGTAGTGGCGGGCGCCTGTAGTCCCAGCTACTTGGGAGGCTGAGGCAGGAGAATGGCGTGAACCCGGGAGGCGGAGCTTGCAGTGAGCCGAGGTCCCGCCACTGCACTCCAGCCTGGGCGACAGAGCGAGACTCCGTCTCAAAAAAAAAAAAAAAAAAAAAAAAAA	NA06994,NA07000,NA07347,NA07357,NA10847,NA11829,NA11830,NA11831,NA11881,NA11919,NA11995,NA12003,NA12004,NA12045,NA12155,NA12156,NA12287,NA12750,NA12813,NA18486,NA18489,NA18498,NA18501,NA18502,NA18504,NA18505,NA18507,NA18510,NA18511,NA18516,NA18517,NA18519,NA18520,NA18522,NA18532,NA18545,NA18547,NA18552,NA18558,NA18561,NA18564,NA18566,NA18570,NA18576,NA18577,NA18582,NA18593,NA18605,NA18608,NA18638…
2	78105134	.	10	.	ALU	-	INS	P1_MEI_1504	294	RP	lowcov	val	PCR	CEU+CHB+JPT	0.03|.|0.01	37|0|40	2|0|1	.	.	.	9	35	14	MEI_RP	40	.			NA11918,NA12761,NA18489,NA18498,NA18499,NA18501,NA18502,NA18504,NA18505,NA18508,NA18510,NA18519,NA18520,NA18523,NA18856,NA18858,NA18870,NA18871,NA18909,NA18912,NA18916,NA18945,NA19099,NA19108,NA19114,NA19129
2	78479836	.	10	.	ALU	+	INS	P1_MEI_3442	.	SR	lowcov	NA	.	.	0.00|.|.	16|0|0	0|0|0	.	.	.	.	0	1	MEI_SR	4	.			NA19143
2	78601995	78602138	1	1	ALU	-	DEL	P1_M_061510_2_214&P2_M_061510_2_425	143	SR,RP,AS	lowcov+trio	val	ASM	CEU+YRI+CHB+JPT	0.94|0.78|0.89	41|52|57	77|81|101	esv4750	.	.	14	.	.	pindel_D,bc_deletion,OXFDU_AS,WASHU_RP,YALEU_SR,PINDEL_SR,BC_RP	.	GENE|AC064872.1|ENSG00000214429	AluYc	TTTTTTTTTTTTTTTTTTTTTTTTTTTTGAGACGGAGTCTCGCTCTGTCGCCCAGGCTGGAGTGCAGTGGCGCGATCTCGGCTCACTGCAAGCTCCGCCTCCCGGGTTCACGCCATTCTCCTGCCTCAGC	NA07051,NA12155,NA12156,NA12716,NA12878,NA18502,NA18508,NA18517,NA18522,NA18523,NA18608,NA18609,NA18638,NA18858,NA18870,NA18947,NA18951,NA19102,NA19257,NA12878,NA12891
2	78639494	78639627	1	1	ALU	-	DEL	P1_M_061510_2_215&P2_M_061510_2_426	133	SR,RP	lowcov+trio	val	ASM	CEU	0.74|.|.	36|0|0	53|0|0	esv4038	.	.	16	.	.	pindel_D,washu,bc_deletion,WASHU_RP,BC_RP,PINDEL_SR	.	.	AluYc	TTTTTTTTTTTTTTTTTTTTTTTTTTTTTGAGACGGAGTCTCGCTCTGTCGCCCAGGCTGGAGTGCAGTGGCGCGATCTCGGCTCACTGCAAGCTCCGCCTCCCGGGTTCACGCCATT	NA07037,NA07051,NA07357,NA10847,NA10851,NA11881,NA11931,NA12003,NA12043,NA12044,NA12155,NA12156,NA12249,NA12716,NA12751,NA12761,NA12763,NA12776,NA12878,NA18501,NA18502,NA18504,NA18505,NA18507,NA18508,NA18511,NA18520,NA18522,NA18523,NA18526,NA18537,NA18542,NA18545,NA18547,NA18550,NA18558,NA18562,NA18564,NA18570,NA18571,NA18573,NA18576,NA18577,NA18592,NA18603,NA18605,NA18608,NA18609,NA18638,NA18858…
2	78818918	.	1	.	ALU	+	INS	P1_MEI_3443&P2_MEI_494	289	RP|SR	lowcov+trio	val	PCR	CEU	0.53|.|.	18|0|0	19|0|0	.	.	.	15	5	16	MEI_SR,MEI_RP	80	.			NA07346,NA11840,NA12043,NA12234,NA12249,NA12812,NA12815,NA12872,NA12873,NA12874,NA12878,NA12891,NA12892
2	78911130	78911491	1	1	ALU	-	DEL	P1_M_061510_2_216	336	RP,SR	lowcov	val	ASM	CEU+YRI+CHB+JPT	0.51|0.52|0.51	42|51|57	43|53|58	.	.	.	.	.	.	pindel_D,broad,bc_deletion,washu	.	.	AluYa5	TCGTGAATATCTCCATGCGTCAGTGTATGAGTTTCTTTTTTTTTTTTTTTTTTTTTTTTTTTTTTTTTTTTTTTTTTTGAGACGGAGTCTCGCTCTGTCGCCCAGGCTGGAGTGCAGTGGCGGGATCTCGGCTCACTGCAAGCTCCGCCTCCCGGGTTCACGCCATTCTCCTGCCTCAGCCTCCCAAGTAGCTGGGACTACAGGCGCCCGCCACTACGCCCGGCTAATTTTTTTGTATTTTTAGTAGAGACGGGGTTTCACCATTTTTTAGCCGGGATGGTCTCGATCTCCTGACCTCGTGATCCGCCCGCCTCGGCCTCCCAAAGTGCTGGGATTACAGGCGTGAGCCACCGCGCCCGGCC	NA06986,NA06994,NA07000,NA07037,NA07051,NA07346,NA07347,NA07357,NA10847,NA10851,NA11829,NA11831,NA11881,NA11894,NA11919,NA11931,NA11992,NA11993,NA11995,NA12003,NA12006,NA12043,NA12044,NA12045,NA12154,NA12156,NA12287,NA12414,NA12716,NA12749,NA12750,NA12751,NA12763,NA12776,NA12813,NA12828,NA12878,NA12891,NA12892,NA18486,NA18489,NA18499,NA18501,NA18505,NA18508,NA18510,NA18511,NA18516,NA18517,NA18520…
2	79748590	79748909	57	46	ALU	+	DEL	P1_M_061510_2_218	319	RP	lowcov	NA	.	.	.|.|.	0|0|0	0|0|0	.	.	.	.	.	.	bc_deletion	.	.	AluYb8	TGAGGCCGGGCGCGGTGGCTCACGCCTGTAATCCCAGCACTTTGGGAGGCCGAGGCGGGTGGATCATGAGGTCAGGAGATCGAGACCATCCTGGCTAACAAGGTGAAACCCCGTCTCTACTAAAAATACAAAAAATTAGCCGGGCGCGGTGGCGGGCGCCTGTAGTCCCAGCTACTCGGGAGGCTGAGGCAGGAGAATGGCGTGAACCCAGGAAGTGGAGCTTGCAGTGAGCCGAGATTGCGCCACTGCAGTCCGCAGTCCGACCTGGGCGACAGAGCGAGACTCCGTCTCAAAAAAAAAAAAAAAAAAAAAAAAAAAAC	NA18573,NA18592,NA18943
2	79782885	.	5	.	L1	+	INS	P2_MEI_2297	.	SR	trio	val	PCR	.	.|.|.	0|0|0	0|0|0	.	.	Beck|CELL2010|ABC10_40	10	3	1	MEI_SR	17	GENE|AC096753.1|ENSG00000242452			NA19240
2	79974067	.	10	.	ALU	+	INS	P2_MEI_2298	.	SR	trio	NA	.	.	.|.|.	0|0|0	0|0|0	.	.	.	.	0	3	MEI_SR	7	.			NA19240
2	80476540	.	10	.	ALU	-	INS	P1_MEI_3444	279	SR	lowcov	NA	.	CEU	0.03|.|.	17|0|0	1|0|0	.	.	.	.	0	1	MEI_SR	4	.			NA11931
2	80622521	.	1	.	ALU	-	INS	P1_MEI_149&P2_MEI_495	261	RP|SR	lowcov+trio	val	PCR	CEU+YRI+CHB+JPT	0.30|0.36|0.27	54|44|49	32|32|26	.	.	.	12	79	118	MEI_SR,MEI_RP	80	.	AluYa5	TTTTTTTCTAAATTTTTTTTTTTTTTGAGACGGAGTCTCGCTCTGTCGCCCAGGCTGGAGTGCAGTGGCGGGATCTCGGCTCACTGCAAGCTCCGCCTCCTGGGTTCACGCCATTCTCCTGCCTCAGCCTCCCAAGTAGCTGGGACTACAGGCGCCCGCCACTACGCCCGGCTAATTTTTTGTATTTTTAGTTAGAGACGGGGTTTCACCGTTTTAGCCGGGATGGTCTCGATCTCCTGACCTCGTGATCCGCCCGCCTCGGCCTCCCAAAGTGCTG	NA06986,NA07000,NA07037,NA07347,NA10847,NA10851,NA11831,NA11918,NA11992,NA11994,NA11995,NA12003,NA12004,NA12006,NA12045,NA12144,NA12154,NA12234,NA12249,NA12287,NA12414,NA12716,NA12749,NA12750,NA12761,NA12763,NA12815,NA12872,NA12873,NA12878,NA12892,NA18489,NA18504,NA18505,NA18508,NA18510,NA18517,NA18520,NA18522,NA18542,NA18552,NA18561,NA18564,NA18570,NA18577,NA18579,NA18582,NA18593,NA18603,NA18605…
2	80715156	.	27	.	ALU	-	INS	P1_MEI_1505	204	RP	lowcov	NA	.	CEU+YRI	0.01|0.04|.	43|41|0	1|3|0	.	.	.	.	7	31	MEI_RP	40	.			NA11894,NA18498,NA18505,NA18552,NA18561,NA18573,NA18593,NA18942,NA18944,NA18949,NA18951,NA18973,NA19005,NA19147
2	80889046	.	47	.	ALU	+	INS	P1_MEI_1506	274	RP	lowcov	NA	.	CEU+YRI	0.01|0.06|0.00	34|31|33	1|4|0	.	.	Iskow|CELL2010|FSTNXB304JBR2A	.	3	3	MEI_RP	12	GENE|AC008067.1|ENSG00000230975			NA12776,NA18499,NA18502,NA19190
2	81607115	81607420	1	1	ALU	+	DEL	P1_M_061510_2_221	305	SR,RP	lowcov	val	ASM	CEU+YRI+CHB+JPT	0.90|1.00|0.96	43|53|56	77|106|107	.	.	.	8	.	.	wtsi,washu,pindel_D,bc_deletion	.	.	AluY	CAGGGCCGGGCGCGGTGGCTCACGCCTGTAATCCCAGCACTTTGGGAGGCCGAGGCGGGCGGATCACGAGGTCAGGAGATCGAGACCATCCTGGCTAACACGGTGAAACCCCGTCTCTACTAAAAATACAAAAAATTAGCCGGGCGTGGTAGCGGGCGCCTGTAGTCCCAGCTACTCGGGAGGCTGAGGCAGGAGAATGGCGTGAACCCGGGAGGCGGAGCTTGCAGTGAGCCGAGATCGCGCCACTGCACTCCAGCCTGGGCGACAGAGCGAGACTCCATCTCAAAAAAAAAAAAAA	NA07000,NA11919,NA11993,NA12004,NA12044,NA12144,NA12716,NA12717,NA18532,NA18592,NA18965
2	81784452	.	1	.	ALU	-	INS	P1_MEI_3445	299	SR	lowcov	NA	.	CEU	0.21|.|.	12|0|0	5|0|0	.	.	.	18	3	2	MEI_SR	20	.	AluYg6	TTTTTTTTTTTTTTTTTTTTTTTTTTTTTGTAGACGGAGTTTCGCTCTGTCGCCCAGGCTGGAGTGCAGTGGCGCGATCTCGACTCACTGCAAGCTCCGCCTCCCGGGTTCACGCCATTCTCCTGCCTCAGCCTCCCGTGTAGCTGGGACTATAGGCACGCGCCACCATGCCCGGCTAATTTTGTATTTTTAGTAGAGACGGGGTTTCACCGTGTTAGCCAGGATGGTCTCGATCCTCCTGACCTCGTGATCCGCCCGTCTCGGCCTCCCAAAGTGCTGGGATTACAGGCGTGAGCCACCGCGCCCGGCC	NA07346,NA12045,NA12873
2	81794583	.	5	.	ALU	-	INS	P1_MEI_3446	300	SR	lowcov	NA	.	CEU	0.08|.|.	12|0|0	2|0|0	.	.	.	12	2	1	MEI_SR	17	.			NA11840,NA12873
2	81928725	.	59	.	ALU	+	INS	P2_MEI_1495	99	RP	trio	NA	.	.	.|.|.	0|0|0	0|0|0	.	.	.	.	7	11	MEI_RP	36	.			NA19238
2	82047724	.	62	.	ALU	+	INS	P1_MEI_1507	57	RP	lowcov	inval	7SLRNA	CEU+YRI+CHB+JPT	0.04|0.05|0.04	37|33|35	3|3|3	.	.	.	.	8	5	MEI_RP	25	.			NA11894,NA12144,NA12154,NA18505,NA18965,NA19005,NA19099,NA19108
2	82193956	82194276	1	1	ALU	-	DEL	P1_M_061510_2_224&P2_M_061510_2_433	320	SR,AS,RP	lowcov+trio	val	ASM	.	.|.|.	0|0|0	0|0|0	esv2879	.	.	16	.	.	washu,bc_deletion,broad,pindel_D,WTSI_RP,OXFDU_AS,BC_RP,YALEU_SR,UWASH_RP,WASHU_RP,PINDEL_SR	.	.	AluYa5	TTTTTTTTTTTTTTTTTTTTTTTTTTTTTTTTTTTGAGACGGAGTCTCGCTCTGTCGCCCAGGCTGGAGTGCAGTGGCGGGATCTCGGCTCACTGCAAGCTCCGCCTCCCGGGTTCACGCCATTCTCCTGCCTCAGCCTCCCAAGTAGCTGGGACTACAGGCGCCCGCCACTACGCCCGGCTAATTTTTTGTATTTTTAGTAGAGACGGGGTTTCACCGTTTTAGCCAGGATGGTCTCGATCTCCTGACCTCGTGATCCGCCCGCCTCGGCCTCCCAAAGTGCTGGGATTACAGGCGTGAGCCAC	NA06986,NA06994,NA07000,NA07037,NA07051,NA07346,NA07347,NA07357,NA10847,NA10851,NA11830,NA11831,NA11881,NA11918,NA11919,NA11931,NA11992,NA11993,NA11994,NA11995,NA12003,NA12004,NA12043,NA12045,NA12144,NA12154,NA12155,NA12156,NA12249,NA12489,NA12716,NA12717,NA12749,NA12750,NA12751,NA12761,NA12776,NA12813,NA12828,NA12878,NA12891,NA12892,NA18486,NA18498,NA18499,NA18501,NA18502,NA18504,NA18505,NA18507…
2	82232718	.	10	.	ALU	-	INS	P1_MEI_3447	.	SR	lowcov	NA	.	CEU	0.03|.|.	18|0|0	1|0|0	.	.	.	.	2	0	MEI_SR	5	.			NA11931,NA11931
2	82521231	.	100	.	ALU	-	INS	P2_MEI_1496	45	RP	trio	NA	.	.	.|.|.	0|0|0	0|0|0	.	.	.	.	4	4	MEI_RP	16	.			NA19238
2	82813571	82813893	1	1	ALU	+	DEL	P1_M_061510_2_226	322	RP	lowcov	val	ASM	CEU+YRI+CHB+JPT	1.00|0.92|1.00	44|52|57	88|96|114	.	.	.	14	.	.	wtsi,bc_deletion	.	.	AluYb8	TGGCCGGGCGCGGTGGCTCACGCCTGTAATCCCAGCACTTTGGGAGGCCGAGGCGGGTGGATCATGAGGTCAGGAGATCGAGACCATCCTGGCTAACAAGGTGAAACCCCGTCTCTACTAAAAATACAAAAAATTAGCCGGGCGCGGTGGCGGGCGCCTGTAGTCCCAGCTACTCGGGAGGCTGAGGCAGGAGAATGGCGTGAACCCGGGAAGCGGAGCTTGCAGTGAGCCGAGATTGCGCCACTGCAGTCCGCAGTCCGACCTGGGCGACAGAGCGAGACTCTGTCTCAAAAAAAAAAAAAAAAAAAA	NA18501,NA18502,NA18504,NA18505,NA18507,NA18517,NA19093,NA19225
2	82823506	.	89	.	ALU	+	INS	P1_MEI_1508	39	RP	lowcov	NA	.	CEU+CHB+JPT	0.05|.|0.10	31|0|30	3|0|6	.	.	.	.	5	9	MEI_RP	28	.			NA12044,NA12749,NA18505,NA18507,NA18916,NA18943,NA18945,NA18951,NA18965,NA19108,NA19225
2	82914789	82915121	1	1	ALU	+	DEL	P1_M_061510_2_227&P2_M_061510_2_435	332	SR,RP	lowcov+trio	val	ASM	CEU+YRI+CHB+JPT	0.86|0.81|0.97	44|49|57	76|79|111	esv2933	.	.	15	.	.	washu,pindel_D,wtsi,bc_deletion,WASHU_RP,YALEU_SR,BC_RP,PINDEL_SR,UWASH_RP	.	.	AluY	GGGCCGGGCGCGGTGGCTCACGCCTGTAATCCCAGCACTTTGGGAGGCCGAGGCGGGCGGATCACGAGGTCAGGAGATCGAGACCATCCTGGCTAACACGGTGAAACCCCGTCTCTACTAAAAATACAAAAAATTAGCCGGGCGTGGTGGCGGGCGCCTGTAGTCCCAGCTACTCGGGAGGCTGAGGCAGGAGAATGGCGTGAACCCGGGAGGCGGAGCTTACAGTGAGCCGAGATCGCGCCACTGCACTCCAGCCTGGGCGACAGAGCGAGACTCCGTCTCAAAAAAAAAAAAAAAAAATAAAAAAAATAAAAAAAA	NA07000,NA07051,NA07346,NA11829,NA12004,NA12489,NA12717,NA12750,NA12751,NA12761,NA12828,NA18504,NA18510,NA18522,NA18552,NA18563,NA18861,NA18871,NA18945,NA19129,NA19138,NA19147,NA19172,NA19190,NA19238,NA19239,NA19240,NA19257,NA19238,NA19239,NA19240
2	83041835	.	4	.	L1	?	INS	P1_MEI_1509&P2_MEI_1497	3903	RP	lowcov+trio	val	PCR	CEU+YRI	0.19|0.26|.	43|42|0	16|22|0	.	.	Iskow|CELL2010|FSTNXB303G7M2A	15	79	39	MEI_RP	80	.			NA07346,NA07357,NA11881,NA11992,NA11994,NA11995,NA12003,NA12004,NA12044,NA12045,NA12249,NA12717,NA12750,NA12892,NA18501,NA18504,NA18510,NA18526,NA18537,NA18552,NA18558,NA18563,NA18564,NA18570,NA18576,NA18592,NA18853,NA18861,NA18870,NA18871,NA18944,NA18949,NA18965,NA18980,NA19102,NA19108,NA19116,NA19129,NA19137,NA19147,NA19172,NA19210,NA19239,NA19240
2	83685231	.	10	.	ALU	-	INS	P1_MEI_3448	.	SR	lowcov	NA	.	CEU	0.42|.|.	12|0|0	10|0|0	.	.	Xing|GR2009|1104685781445	.	8	0	MEI_SR	16	.			NA11931,NA12873,NA18970,NA12287,NA12815,NA12045,NA12874
2	84047336	84047772	1	1	L1	-	DEL	P1_M_061510_2_228	436	RP	lowcov	val	ASM	CEU+YRI+CHB+JPT	1.00|0.81|0.99	44|52|57	88|84|113	.	.	.	7	.	.	wtsi,bc_deletion,broad	.	.	L1PA2	GTGTGTTGTTGTTTTTTTTAATTAATTAATTAATTTATTTATTTTATTTTTTTTATTTTTTATTTTTTTATTATACTTTAAGTTTTAGGGTACATGTGCACATTGTGCAGGTTAGTTACATATGTATACATGTGCCATGCTGGTGCGCTGCACCCACTAACTCGTCATCTAGCCTTAGGTATATCTCCCAATGCTATCCATCCCCCCTCCCCCCACCCCACCACAGTCCCCAGAGTGTGATATTCCCCTTCATGTGTCCATGTGATCTCATTGTTCAATTCCCACCTATGAGTGAGAATATGCGGTGTTTGGTTTTTTGTTCTTGCGATAGTTTACTGAGAATGATGATTTCCAATTTCATCCATGTCCCTACAAAGGACATGAACTCATCATTTTTTA…	NA06994,NA12287,NA12489,NA12761,NA12776,NA18486,NA18501,NA18507,NA18516,NA18517,NA18520,NA18522,NA18523,NA18555,NA18853,NA18858,NA18907,NA18909,NA18916,NA18967,NA18968,NA18972,NA18973,NA18974,NA18975,NA18976,NA18981,NA19005,NA19098,NA19114,NA19116,NA19119,NA19131,NA19137,NA19138,NA19147,NA19160,NA19190,NA19200,NA19201,NA19209,NA19210
2	84111259	.	10	.	ALU	+	INS	P1_MEI_150	231	SR|RP	lowcov	NA	.	CEU	0.01|0.00|0.00	49|37|47	1|0|0	.	.	.	.	4	3	MEI_SR,MEI_RP	24	.			NA10847,NA12872
2	84443642	.	9	.	ALU	-	INS	P1_MEI_151	219	SR|RP	lowcov	NA	.	.	0.00|.|.	16|0|0	0|0|0	.	.	Xing|GR2009|1104685781605	.	7	0	MEI_SR,MEI_RP	24	.			NA07037,NA10851,NA11894,NA11919,NA12004,NA12234,NA12287,NA12489,NA12749,NA12750,NA12873,NA18519,NA18547,NA18571,NA18576,NA18965,NA19108
2	84497078	.	11	.	ALU	+	INS	P1_MEI_1510&P2_MEI_1498	136	RP	lowcov+trio	val	PCR	CEU+YRI+CHB+JPT	0.01|0.18|0.01	45|42|49	1|15|1	.	.	.	9	29	10	MEI_RP	80	.			NA11894,NA18489,NA18504,NA18508,NA18576,NA18853,NA18858,NA18909,NA18916,NA19099,NA19108,NA19137,NA19190,NA19225,NA19239,NA19240
2	84582252	.	1	.	ALU	+	INS	P1_MEI_3449&P2_MEI_2299	291	SR	lowcov+trio	NA	.	.	.|.|.	0|0|0	0|0|0	.	.	Xing|GR2009|1104685781634	12	8	27	MEI_SR	66	.	AluYg6	GGCCGGGCGCGGTGGCTCACGCCTGTAATCCCAGCACTTTGGGAGGCCCGAGGCGGGCGGATCACGAGGTCAGGAGATCGAGACCATCCTGGCTAACACGGTGAAAACCCCCGTCTCTACTAAAAATACAAAAAATTAGCCGGGCATGGTGGCGCGCGCCTGTAGTCCCAGAACTAACACGGGAGGCTGAGGCAGGAGAATGGCGGTGAACCCGGGAGGCGGAGCTTGCAGTGAGTCGAGATCGCGCCACTGCACTCCAGCCTGGGCGACAGAGCGAAACTCCGTACTCAAAAAAAAACAAAAAAAAAAAAAAAA	NA07346,NA11881,NA11918,NA11931,NA12043,NA12045,NA12234,NA12249,NA12287,NA12872,NA12873,NA12874,NA12878,NA18969,NA19141,NA19143,NA19240
2	84611951	84612244	1	1	ALU	-	DEL	P1_M_061510_2_229&P2_M_061510_2_438	293	SR,RP	lowcov+trio	val	ASM	CEU+YRI	0.15|0.25|.	30|40|0	9|20|0	esv4558	.	.	13	.	.	bc_deletion,washu,UWASH_RP,BC_RP,WASHU_RP,YALEU_SR	.	GENE|DNAH6|ENSG00000115423	AluY	TTTTTTTTATTTTTTATTTTTTTTTATTTTTTTTTTTTTTGAGACGGAGTCTCGCTCTGTCGCCCAGGCTGGAGTGCAGTGGCGCGATCTCGGCTCACTGCAAGCTCCGCCTCCCGGGTTCACGCCATTCTCCTGCCTCAGCCTCCCGAGTAGCTGGGACTACAGGCGCCCGCTACCACGCCCGGCTAATTTTTTGTATTTTTAGTAGAGACGGGGTTTCACCGTGTTAGCCAGGATGGTCTCGATCTCCTGACCTCGTGATCCGCCCGCCTCGGCCTCCC	NA07000,NA07037,NA07051,NA07357,NA10847,NA10851,NA11831,NA11918,NA11919,NA11920,NA11931,NA11993,NA12004,NA12006,NA12043,NA12044,NA12045,NA12144,NA12249,NA12414,NA12489,NA12716,NA12717,NA12749,NA12750,NA12751,NA12761,NA12763,NA12776,NA18499,NA18501,NA18505,NA18508,NA18516,NA18523,NA18562,NA18564,NA18566,NA18571,NA18572,NA18573,NA18576,NA18577,NA18579,NA18593,NA18605,NA18608,NA18609,NA18638,NA18861…
2	85180481	85180788	1	1	ALU	+	DEL	P1_M_061510_2_231&P2_M_061510_2_439	307	SR,RP	lowcov+trio	val	ASM	CEU+YRI+CHB+JPT	0.53|0.43|0.30	44|46|43	47|40|26	esv4852	.	.	11	.	.	pindel_D,bc_deletion,washu,WTSI_RP,PINDEL_SR,YALEU_SR,BC_RP,UWASH_RP	.	.	AluY	TCTCACGCCTGTAATCCCAGCACTTTGGGAGGCCGAGGCGGGCGGATCACGAGGTCAGGAGATCGAGACCATCCTGGCTAACACGGTGAAACCCCGTCTCTACTAAAAATACAAAAAATTAGCCGGGCGTGGTGGCGGGCGCCTGTAGTCCCAGCTACTCGGGAGGCTGAGGCAGGAGAATGGCGTGAACCCGGGAGGCGGAGCTTGCAGTGAGCCGAGATCGCGCCACTGCACTCCAGCCTGGGCGACAGAGCGAGACTCCGTCTCAAAAAAAAAAAAAAAAAAAAAAAAAAAAAA	NA07037,NA07051,NA10847,NA10851,NA11918,NA11920,NA11931,NA11992,NA11993,NA11995,NA12006,NA12154,NA12776,NA12878,NA18486,NA18498,NA18499,NA18501,NA18507,NA18508,NA18510,NA18516,NA18522,NA18523,NA18526,NA18542,NA18545,NA18547,NA18550,NA18555,NA18558,NA18562,NA18563,NA18566,NA18570,NA18571,NA18572,NA18573,NA18576,NA18577,NA18579,NA18582,NA18592,NA18593,NA18605,NA18608,NA18858,NA18861,NA18909,NA18912…
2	85188868	85189186	1	1	ALU	+	DEL	P1_M_061510_2_232	318	SR,RP	lowcov	val	ASM	CEU+YRI+CHB+JPT	0.83|0.74|0.91	43|53|57	71|78|104	.	.	.	13	.	.	broad,bc_deletion,washu,pindel_D,wtsi	.	.	AluYb8	CGCCGGGCGCGGTGGCTCACGCCTGTAATCCCAGCACTTTGGGAGGCCGAGGCGGGTGGATTATGAGGTCAGGAGATCGAGACCATCCTGGCTAACAAGGTGAAACCCCGTCTCTACTAAAAATACAAAAAATTAGCCGGGCGCGGTGGCGGGCGCCTGTAGTCCCAGCTACTCGGGAGGCTGAGGCAGGAGAATGGCGTGAACCCGGGAAGCGGAGCTTGCAGTGAGCCGAGATTGCGCCACTGCAGTCCGCAGTCCGGCCTGGGCGACAGAACGAGACTCCGTCTCAAAAAAAAAAAAAAAAAA	NA06986,NA06994,NA07000,NA07037,NA07051,NA07357,NA11919,NA11931,NA11993,NA11995,NA12004,NA12043,NA12156,NA12287,NA12489,NA12717,NA12750,NA12763,NA12813,NA18486,NA18489,NA18498,NA18502,NA18508,NA18516,NA18517,NA18520,NA18522,NA18523,NA18545,NA18570,NA18579,NA18592,NA18608,NA18853,NA18858,NA18871,NA18912,NA18940,NA18942,NA18945,NA18952,NA18953,NA18960,NA18967,NA18968,NA18971,NA18972,NA18973,NA18974…
2	85372616	85372953	1	1	ALU	-	DEL	P1_M_061510_2_233&P2_M_061510_2_441	337	RP,SR	lowcov+trio	val	PCR,ASM	CEU+YRI	0.51|0.29|.	38|34|0	39|20|0	esv3927	.	.	16	.	.	washu,broad,bc_deletion,YALEU_SR,UWASH_RP,BC_RP,WTSI_RP,PINDEL_SR	.	GENE|TCF7L1|ENSG00000152284	AluYa5	TTTTTTTTTTTTTTTTTTTTTTTTTTTTTTTTTTTTTTTTTGAGACGGAGTCTCGCTCTGTCGCCCAGGCTGGAGTGCAGTGGCACGATCTCGGCTCACTGCAAGCTCCGCCTCCCGGGTTCACGCCATTCTCCCGCCTCAGCCTCCCAAGTAGCTGGGACTACAGGCGCCCGCCACTACGCCCGGCTAATTTTTTGTATTTTTAGTAGAGACGGGGTTTCACCGTTTTAGCCGGGATGGTCTCGATCTCCTGACCTCGTGATCCGCCCGCCTCGGCCTCCCAAAGTGCTGGGATTACAGGCGTGAGCCACCGCGCCCGGCC	NA06994,NA07000,NA07051,NA07346,NA07347,NA07357,NA10847,NA10851,NA11829,NA11830,NA11831,NA11881,NA11894,NA11918,NA11919,NA11920,NA11931,NA11992,NA11993,NA11994,NA11995,NA12004,NA12043,NA12044,NA12045,NA12144,NA12155,NA12156,NA12287,NA12414,NA12489,NA12716,NA12717,NA12750,NA12751,NA12761,NA12763,NA12776,NA12813,NA12828,NA12878,NA12891,NA12892,NA18486,NA18489,NA18498,NA18499,NA18501,NA18502,NA18504…
2	85443079	.	10	.	ALU	+	INS	P1_MEI_3450	.	SR	lowcov	NA	.	CEU	0.04|.|.	14|0|0	1|0|0	.	.	.	.	0	2	MEI_SR	5	GENE|ELMOD3|ENSG00000115459			NA12234
2	88102083	88102330	1	1	ALU	+	DEL	P1_M_061510_2_948&P2_M_061510_2_579	247	SR	lowcov+trio	val	ASM	.	.|.|.	0|0|0	0|0|0	esv3476	.	.	2	.	.	wtsi,pindel_D,PINDEL_SR	.	.	AluYa5	AGGAGATCGAGACCATCCCGGCTATAGCGGTGAAACCCCGTCTCTACTAAAAATACAAAAAATTAGCCGGGCGTAGTGGCGGGCGCCTGTAGTCCCAGCTACTTGGGAGGCTGAGGCAGGAGAATGGCGTGAACCCGGGAGGCGGAGCTTGCAGTGAGCCGAGATCCCGCCACTGCACTCCAGCCTGGGCGACAGAGCGAGACTCCGTCTCAAAAAAAAAAAAAAAAAAAAAAAAAAAAAAAAAAA	NA07037,NA07346,NA10847,NA10851,NA11830,NA11894,NA11920,NA11931,NA11992,NA11993,NA12003,NA12005,NA12043,NA12249,NA12287,NA12716,NA12717,NA12749,NA12761,NA12776,NA12828,NA18489,NA18502,NA18510,NA18523,NA18532,NA18542,NA18545,NA18547,NA18558,NA18571,NA18572,NA18576,NA18577,NA18579,NA18592,NA18608,NA18638,NA18856,NA18858,NA18861,NA18907,NA18916,NA18940,NA18944,NA18948,NA18949,NA18952,NA18953,NA18956…
2	88381931	88382257	1	1	ALU	-	DEL	P1_M_061510_2_236&P2_M_061510_2_445	326	SR,RP	lowcov+trio	val	ASM	CEU+YRI+CHB+JPT	0.84|0.55|0.86	44|52|55	74|57|95	esv2909	.	.	15	.	.	wtsi,washu,broad,pindel_D,bc_deletion,WTSI_RP,UWASH_RP,PINDEL_SR,BC_RP,YALEU_SR,WASHU_RP	.	.	AluYa5	TTTTTTTTTTTTTTTTTTTTTTTTTTTTTTGAGACGGAGTCTCGCTCTGTCGCCCAGGCTGGAGTGCAGTGGCGGGATCTCGGCTCACTGCAAGCTCCGCCTCCCGGGTTCACGCCATTCTCCTGCCTCAGCCTCCCAAGTAGCTGGGACTACAGGCGCCCGCCACTACGCCCGGCTAATTTTTTTGTATTTTTAGTAGAGACGGGGTTTCACCGTTTTAGCCGGGATGGTCTCGATCTCCTGACCTCGTGATCCGCCCGCCTCGGCCTCCCAAAGTGCTGGGATTACAGGCGTGAGCCACCGCGCCCGGCC	NA06994,NA07051,NA10847,NA11829,NA11830,NA11918,NA11919,NA11931,NA11995,NA12004,NA12005,NA12006,NA12144,NA12287,NA12717,NA12749,NA12750,NA12776,NA12813,NA12878,NA12891,NA12892,NA18486,NA18498,NA18499,NA18501,NA18502,NA18504,NA18505,NA18511,NA18517,NA18519,NA18520,NA18523,NA18532,NA18550,NA18552,NA18582,NA18592,NA18603,NA18605,NA18609,NA18853,NA18856,NA18858,NA18861,NA18870,NA18871,NA18912,NA18916…
2	88810343	88813397	1	1	L1	+	DEL	P1_M_061510_2_238&P2_M_061510_2_89	3054	SR,RP,AS	lowcov+trio	val	PCR,ASM	CEU+CHB+JPT	0.45|.|0.63	39|0|46	35|0|58	esv4683	.	.	18	.	.	bc_deletion,washu,broad,pindel_D,BGI_AS,WTSI_RP,AB_RP,PINDEL_SR,UWASH_RP,YALEU_SR,YALEU_RP,WASHU_RP,OXFDU_AS,BC_RP	.	GENE|RPIA|ENSG00000153574	L1HS	GCAGAACTGAAGGAAATAGAGACACAAAAAACCCTTCAAAAAATCAATGAATCCAGGAGCTGGTTTTTTGAAAGGATCAACAAAATTGATAGACCGCTAGCAAGACTAATAAAGAAAAAAAGAGAGAAGAATCAAATAGACACAATAAAAAATGATAAAGGGGATATCACCACCGATCCCACAGAAATACAAACTACCATCAGAGAATACTACAAACACCTCTACGCAAATAAACTAGAAAATCTAGAAGAAATGGATACATTCCTCGACACATACACTCTCCCAAGACTAAACCAGGAAGAAGTTGAATCTCTGAATAGACCAATAACAGGCTCTGAAATTGTGGCAATAATCAATAGTTTACCAACCAAAAAGAGTCCAGGACCAGATGGATTCACA…	NA06994,NA07000,NA07037,NA07051,NA07346,NA07347,NA10847,NA10851,NA11831,NA11881,NA11894,NA11918,NA11920,NA11931,NA11994,NA11995,NA12003,NA12004,NA12006,NA12043,NA12044,NA12045,NA12144,NA12154,NA12155,NA12156,NA12287,NA12489,NA12716,NA12717,NA12749,NA12750,NA12751,NA12761,NA12763,NA12776,NA12828,NA12878,NA12891,NA12892,NA18486,NA18489,NA18499,NA18501,NA18502,NA18504,NA18505,NA18507,NA18508,NA18510…
2	97863036	.	68	.	ALU	-	INS	P2_MEI_1500	35	RP	trio	NA	.	.	.|.|.	0|0|0	0|0|0	.	.	.	.	4	3	MEI_RP	14	GENE|TMEM131|ENSG00000075568			NA19238
2	97948578	.	1	.	ALU	+	INS	P1_MEI_152	290	SR|RP	lowcov	val	PCR	CEU+YRI+CHB+JPT	0.23|0.21|0.19	51|41|49	23|17|19	.	.	Xing|GR2009|1104685755767	10	91	62	MEI_SR,MEI_RP	40	GENE|TMEM131|ENSG00000075568	AluYa5	GGCCGGGGCGCGGTGGCTCACGCCTGTAATCCCAGCACTTTGGGAGGCCGAGGCGGGCGGATCACGAGGTCAGGAGATCGAGACCATCCCGGCTAAAACGGTGAAACCCCGTCTCTACTAAAAATACAAAAAAAATTAGCCGGGCGTAGTGGCGGGCGCCTGTAGTCCCAGCTACTTGGGAGGGCTGAGGCAGGAGAATGGCATGAACCCGGGAGGCGGAGCTTGCAGTGAGCCGAGATCCCGCCACTGCACTCCAGCCTGGGCGACAGAGCGAGACTCCGTCTACAAAAAAAAAAAAAAA	NA06986,NA07000,NA07037,NA10851,NA11919,NA11931,NA11992,NA11993,NA11994,NA12003,NA12006,NA12044,NA12045,NA12156,NA12234,NA12249,NA12489,NA12717,NA12749,NA12761,NA12812,NA12814,NA12828,NA18498,NA18507,NA18517,NA18523,NA18537,NA18542,NA18547,NA18550,NA18555,NA18561,NA18562,NA18563,NA18564,NA18566,NA18573,NA18576,NA18579,NA18608,NA18853,NA18858,NA18871,NA18907,NA18909,NA18912,NA18951,NA18956,NA19102…
2	99017687	.	32	.	ALU	-	INS	P1_MEI_1511	281	RP	lowcov	NA	.	.	.|.|.	0|0|0	0|0|0	.	.	.	.	.	.	MEI_RP	3	GENE|TSGA10|ENSG00000135951			NA18582
2	99119396	99119732	1	1	ALU	+	DEL	P1_M_061510_2_243&P2_M_061510_2_452	336	RP,SR	lowcov+trio	val	ASM	CEU+YRI	0.40|0.64|.	41|49|0	33|63|0	esv2898	.	.	16	.	.	pindel_D,bc_deletion,washu,broad,YALEU_SR,UWASH_RP,BC_RP,WTSI_RP,PINDEL_SR	.	GENE|TSGA10|ENSG00000135951	AluYa5	GCCGGGCGCGGTGGCTCACGCCTGTAATCCCAGCACTTTGGGAGGCCGAGGCGGGCGGATCACGAGGTCAGGAGATCGAGACCATCCCGGCTAAAACGGTGAAACCCCGTCTCTACTAAAAATACAAAAAAAATTAGCCGGGCGTAGTGGCGGGCGCCTGTAGTCCCAGCTACTCGGGAGGCTGAGGCAGGAGAATGGCGTGAACCCGGGAGGCGGAGCTTGCAGTGAGCCGAGATCCCGCCACTGCACTCCAGCCTGGGCGACAGAGCGAGACTCCATCTCAAAAAAAAAAAAAAAAAAAAAAAAAAAAAAAAAAAAAAA	NA06986,NA07037,NA07346,NA07347,NA07357,NA10847,NA10851,NA11829,NA11830,NA11831,NA11881,NA11894,NA11918,NA11919,NA11993,NA11994,NA11995,NA12003,NA12004,NA12005,NA12006,NA12043,NA12044,NA12144,NA12155,NA12156,NA12249,NA12287,NA12414,NA12489,NA12716,NA12749,NA12750,NA12751,NA12763,NA12776,NA12813,NA12828,NA12878,NA12891,NA12892,NA18486,NA18498,NA18501,NA18502,NA18504,NA18505,NA18508,NA18510,NA18511…
2	99803642	.	1	.	ALU	-	INS	P1_MEI_3451&P2_MEI_2300	310	SR	lowcov+trio	NA	.	.	.|.|.	0|0|0	0|0|0	.	.	.	31	9	2	MEI_SR	43	GENE|AFF3|ENSG00000144218	AluYa5	TTTTTTTTTTTTTTTTTTTTTTTTTTTGTAGACGGAGTCTCGCTCTGTCGCCCAGGCTGGAGTGCAGTGGCGCAATCTCGGCTCACTGCAAGCTCCGCCTCCCAGGTTCACGCCATTCTCCTGTCCTTTCAGCCTCCCAAGTAGCTGGGACTACAGGCGCCCGCCACTACGCCCGGCTAATTTTTTGTATTTTTAGTAGAGACGGGGTTTCACCGTTTTAGCCGGGATGGTCTCGATCTCCTGACCTCGTGATCCGCCCACCTCGGCCTCCCAAAGTGCTGGGATTACAGGCGTGAGCCACCGCGCCCGGCC	NA07347,NA11881,NA11894,NA12043,NA12045,NA12878,NA18969
2	100152284	.	23	.	ALU	+	INS	P1_MEI_1512	241	RP	lowcov	NA	.	YRI	0.00|0.14|0.00	40|35|44	0|10|0	.	.	.	.	15	5	MEI_RP	40	.			NA18517,NA18853,NA18907,NA19093,NA19108,NA19138,NA19190,NA19210
2	100667601	.	22	.	ALU	+	INS	P1_MEI_1513	52	RP	lowcov	NA	.	CHB+JPT	0.00|0.00|0.11	42|37|46	0|0|10	.	.	.	7	13	8	MEI_RP	40	.			NA18532,NA18537,NA18550,NA18576,NA18608,NA18609,NA18638,NA18947
2	101341635	101341968	1	1	ALU	+	DEL	P1_M_061510_2_244&P2_M_061510_2_95	333	SR,RP	lowcov+trio	val	ASM	CEU+YRI	0.37|0.75|.	31|48|0	23|72|0	esv4768	.	.	11	.	.	pindel_D,bc_deletion,wtsi,washu,WTSI_RP,PINDEL_SR,WASHU_RP,YALEU_SR,BC_RP,UWASH_RP	.	GENE|CREG2|ENSG00000175874	AluYa5	GTGGCCGGGCGCGGTGGCTCACGCCTGTAATCCCAGCACTTTGGGAGGCCGAGGCGGGCGGATCACGAGGTCAGGAGATCGAGACCATCCCGGCTAAAACGGTGAAACCCCGTCTCTACTAAAAATACAAAAAATTAGCCGGGCGTAGTGGCGGGCGCCTGTAGTCCCAGCTACTTGGGAGGCTGAGGCAGGAGAATGGCGTGAACCCGGGAGGCGGAGCTTGCAGTGAGCCGAGATCCCGCCACTGCACTCCAGCCTGGGCGACAGAGCGAGACTCCGTCTCAAAAAAAAAAAAAAAAAAAAAAAAAAAAAAAAAAAAAAGA	NA07000,NA07051,NA07347,NA07357,NA10847,NA10851,NA11829,NA11831,NA11918,NA11919,NA11920,NA11992,NA11993,NA11994,NA11995,NA12005,NA12006,NA12044,NA12045,NA12156,NA12249,NA12287,NA12716,NA12717,NA12750,NA12751,NA12761,NA12763,NA12878,NA18489,NA18501,NA18505,NA18510,NA18526,NA18532,NA18537,NA18542,NA18545,NA18550,NA18552,NA18555,NA18558,NA18562,NA18564,NA18566,NA18570,NA18572,NA18573,NA18576,NA18577…
2	101464270	101464597	1	1	ALU	-	DEL	P1_M_061510_2_245&P2_M_061510_2_96	327	SR,RP	lowcov+trio	val	ASM	CEU+YRI+CHB+JPT	0.28|0.31|0.30	36|43|46	20|27|28	esv4047	.	.	15	.	.	broad,bc_deletion,washu,pindel_D,wtsi,WTSI_RP,PINDEL_SR,BC_RP,WASHU_RP,UWASH_RP,YALEU_SR	.	GENE|AC092570.4|ENSG00000223826	AluY	TTTTTTTTTTTTTTTTTTTTTTTTTTTTTTTTGAGACGGAGTCTCGCTCTGTCGCCCAGGCTGGAGTGCAGTGGCGCGATCTCGGCTCACTGCAAGCTCCGCCTCCCGGGTTCACGCCATTCTCCTGCCTCAGCCTCCCGAGTAGCTGGGACTACAGGCGCCCGCTACCACGCCCGGCTAATTTTTTGTATTTTTAGTAGAGACGGGGTTTCACCGTGTTAGCCAGGATGGTCTCGATCTCCTGACCTCGTGATCCGCCCGCCTCGGCCTCCCAAAGTGCTGGGATTACAGGCGTGAGCCACCGCGCCCGGCC	NA06986,NA06994,NA07000,NA07037,NA07051,NA07346,NA07347,NA07357,NA10847,NA11830,NA11881,NA11894,NA11918,NA11919,NA11920,NA11931,NA11992,NA11993,NA11994,NA11995,NA12003,NA12004,NA12005,NA12006,NA12043,NA12045,NA12144,NA12154,NA12156,NA12249,NA12287,NA12414,NA12489,NA12716,NA12717,NA12749,NA12750,NA12751,NA12761,NA12763,NA12776,NA12813,NA12828,NA12878,NA12891,NA18486,NA18489,NA18498,NA18499,NA18502…
2	101723032	101723347	1	1	ALU	-	DEL	P1_M_061510_2_247&P2_M_061510_2_99	315	RP,SR	lowcov+trio	val	ASM	CEU+YRI+CHB+JPT	0.94|0.27|0.97	44|51|57	83|28|111	.	.	.	15	.	.	pindel_D,washu,bc_deletion,wtsi,broad,WASHU_RP,YALEU_SR,UWASH_RP,BC_RP,PINDEL_SR	.	GENE|MAP4K4|ENSG00000071054	AluYa5	TTTTTTTTTTTTTTTTTTTGAGACGGAGTCTCGCTCTGTCGCCCAGGCTGGAGTGCAGTGGCGGGATCTCGGCTCACTGCAAGCTCCGCCTCCCGGGTTCACGCTATTCTCCTGCCTCAGCCTCCCAAGTAGCTGGGACTACAGGCGCCCGCCACTACGCCCGGCTAATTTTTTGTATTTTTAGTAGAGACGGGGTTTCACCGTTTTTAGCCGGGATGGTCTCGATCTCCTGACCTCGTGATCCGCCCGCCTCGGCCTCCCAAAGTGCTGGGATTACAGGCGTGAGCCACCGCGCCCGGCC	NA06994,NA11830,NA11881,NA11918,NA11931,NA12043,NA12155,NA12156,NA12287,NA12717,NA12776,NA12813,NA18486,NA18489,NA18498,NA18499,NA18502,NA18504,NA18507,NA18508,NA18510,NA18511,NA18516,NA18517,NA18519,NA18520,NA18522,NA18523,NA18526,NA18550,NA18571,NA18603,NA18853,NA18856,NA18858,NA18861,NA18871,NA18907,NA18909,NA18912,NA18916,NA18943,NA18947,NA18953,NA18956,NA18959,NA18967,NA18968,NA18971,NA18972…
2	102278866	.	7	.	L1	+	INS	P1_MEI_3452&P2_MEI_2258	.	SR	lowcov+trio	NA	.	CEU	0.12|.|.	16|0|0	4|0|0	.	.	.	.	0	6	MEI_SR	14	.			NA12249,NA12814,NA12874,NA19141,NA19143,NA19240
2	102688915	102689250	1	1	ALU	+	DEL	P1_M_061510_2_248&P2_M_061510_2_101	335	SR,RP	lowcov+trio	val	ASM	CEU+YRI+CHB+JPT	0.30|0.28|0.20	38|39|57	23|22|23	esv8909	.	.	13	.	.	washu,pindel_D,broad,wtsi,bc_deletion,WTSI_RP,YALEU_SR,BC_RP,PINDEL_SR	.	GENE|SLC9A2|ENSG00000115616	AluYb8	CGGCCGGGCGCGGTGGCTCACGCCTGTAATCCCAGCACTTTGGGAGGCCGAGGCGGGTGGATCACGAGGTCAGGAGATCGAGACCATCCTGGCTAACAAGGTGAAACCCCGTCTCTACTGAAAATACAAAAAATTAGCCGGGCGCGGTGGCGGGCGCCTGTAGTCCCAGCTACTCGGGAGGCTGAGGCAGGAGAATGGCGTGAACCCAGGAAGCGGAGCTTGCAGTGAGCCGAGATTGCGCCATTGCAGTCCGCAGTCCGGCCTGGGCAACAGAGCGAGACTCCGTCTCAAAAAAAAAAAAAAAAAAAAAAGAAAAAAAAAAA	NA06994,NA07000,NA07037,NA07051,NA07346,NA07347,NA07357,NA10847,NA10851,NA11829,NA11830,NA11831,NA11881,NA11894,NA11918,NA11919,NA11920,NA11931,NA11992,NA11993,NA11994,NA11995,NA12003,NA12004,NA12005,NA12006,NA12043,NA12045,NA12144,NA12154,NA12155,NA12156,NA12249,NA12287,NA12414,NA12489,NA12717,NA12749,NA12750,NA12751,NA12763,NA12776,NA12878,NA12891,NA12892,NA18486,NA18489,NA18498,NA18499,NA18501…
2	103134448	.	43	.	ALU	+	INS	P2_MEI_1424	248	RP	trio	NA	.	.	.|.|.	0|0|0	0|0|0	.	.	.	.	7	5	MEI_RP	23	GENE|AC073987.1|ENSG00000229209			NA19238
2	103317115	.	17	.	ALU	-	INS	P1_MEI_1514&P2_MEI_1425	60	RP	lowcov+trio	NA	.	YRI	0.00|0.14|0.00	45|43|48	0|12|0	.	.	.	.	5	12	MEI_RP	74	.			NA18498,NA18510,NA18516,NA18522,NA18856,NA18871,NA18916,NA19102,NA19238,NA19239
2	104205567	104205874	1	1	ALU	+	DEL	P1_M_061510_2_251	307	RP	lowcov	val	ASM	CEU+YRI+CHB+JPT	1.00|0.86|1.00	44|53|57	88|91|114	.	.	.	10	.	.	bc_deletion,wtsi	.	.	AluYa5	CGGCCGGGCGCGGTGGCTCACGCCTGTAATCCCAGCACTTTGGGAGGCCGAGGCGGGCGGATCACGAGGTCAGGAGATCGAGACCATCCCAGCTAAAACGGTGAAACCCCGTCTCTACTAAAAATACAAAAAATTAGCCGGGCGTAGTGGCGGGCGCCTGTAGTCCCAGCTACTTGGGAGGCTGAGGCAGGAGAATGGCGTGAACCCGGGAGGTGGAGCTTGCAGTGAGCCGAGATCCCGCCACTGCACTCCAGCCTGGGCGACAGAGCGAGACTCCGTCTCAAAAAAAAAAAAAAAA	NA18498,NA18504,NA18511,NA18519,NA18520,NA18853,NA19093,NA19099,NA19147
2	104706078	.	10	.	ALU	+	INS	P1_MEI_3453	.	SR	lowcov	NA	.	CEU	0.08|.|.	13|0|0	2|0|0	.	.	.	.	0	1	MEI_SR	4	.			NA12873
2	105529591	.	17	.	L1	+	INS	P1_MEI_1515&P2_MEI_1426	457	RP	lowcov+trio	NA	.	CEU+YRI+CHB+JPT	0.08|0.03|0.05	46|43|48	7|3|5	.	.	Ewing|GR2010|chr2_105529652	1	11	11	MEI_RP	72	.			NA06986,NA07037,NA10847,NA11829,NA11830,NA12004,NA12892,NA18520,NA18558,NA18572,NA18608,NA18945,NA18965,NA19190
2	105583091	.	24	.	L1	-	INS	P1_MEI_1516	6027	RP	lowcov	NA	.	YRI	0.00|0.10|0.00	42|41|50	0|8|0	.	.	Iskow|CELL2010|RI_20_4_23_D08	.	7	18	MEI_RP	40	.			NA18489,NA18498,NA18501,NA18519,NA18522,NA18856,NA18870
2	105818998	.	4	.	ALU	-	INS	P1_MEI_153&P2_MEI_421	181	RP|SR	lowcov+trio	val	PCR	YRI+CHB+JPT	.|0.55|0.24	0|40|42	0|44|20	.	.	.	11	34	80	MEI_SR,MEI_RP	80	GENE|NCK2|ENSG00000071051	AluYf4	TTTTTTTTTTTTTTTTTTTTTTTGTTAGACGGAGTCTCGCTGTCGCCCAGGCTGGAGTGCAGTGGCGCAATCTCGGCTCACTGCAGGCTCCGCCCCCTGGGGTTCACGCCATTCTCCTGCCTCAGCCTCCCGTAGTTAGCTGGGACTACAGGCGCCCGCCACCTCGCCCGGCTAATTTTTTGTATTTTTAGTAGAGACGGGGTTTCACCGTGTTAGCCAGGATGGTCTCGATCTCCTGACCTCGTGATCCGCCCGCCCTCGGCCTCCCAAAGTGCTGGGATTACAGGCGTGAGCCACCGCGCCCGGCC	NA07000,NA10851,NA11829,NA11830,NA11919,NA11931,NA11995,NA12003,NA12043,NA12717,NA12749,NA12892,NA18489,NA18499,NA18501,NA18502,NA18504,NA18505,NA18508,NA18510,NA18517,NA18519,NA18520,NA18522,NA18523,NA18532,NA18537,NA18547,NA18550,NA18562,NA18564,NA18570,NA18573,NA18577,NA18605,NA18609,NA18856,NA18858,NA18870,NA18871,NA18907,NA18909,NA18916,NA18940,NA18942,NA18944,NA18945,NA19093,NA19099,NA19108…
2	105952042	.	1	.	ALU	+	INS	P1_MEI_3454	293	SR	lowcov	val	PCR	CEU	0.17|.|.	15|0|0	5|0|0	.	.	.	15	4	6	MEI_SR	30	.			NA12249,NA11931,NA11931,NA11931,NA11931,NA07346
2	106026965	.	10	.	ALU	+	INS	P1_MEI_3455	.	SR	lowcov	NA	.	.	0.00|.|.	15|0|0	0|0|0	.	.	.	.	0	1	MEI_SR	4	.			NA19141
2	107291039	.	29	.	ALU	-	INS	P1_MEI_1517	52	RP	lowcov	NA	.	YRI	.|0.12|0.00	0|17|28	0|4|0	.	.	.	3	6	8	MEI_RP	28	GENE|AC006227.1|ENSG00000229457			NA06986,NA11920,NA11992,NA12154,NA18504,NA18520,NA18909
2	107292813	107293154	1	1	ALU	+	DEL	P1_M_061510_2_255&P2_M_061510_2_106	341	SR,RP	lowcov+trio	val	ASM	CEU+YRI+CHB+JPT	0.83|0.55|0.96	44|37|57	73|41|110	.	.	.	15	.	.	bc_deletion,WTSI_RP,WASHU_RP,BC_RP,PINDEL_SR	.	GENE|AC006227.1|ENSG00000229457	AluYa5	TGGCCGGGCGCGGTGGCTCACGCCTGTAATCCCAGCACTTTGGGAGGCCGAGGCGGGCGGATCACGAGGTCAGGAGATCGAGACCATCCCGGCTAAAACGGTGAAACCCCGTCTCTACTAAAAATACAAAAAATTAGCCGGGCGTGGTGGCGGGCGCCTGTAGTCCCAGCTACTTGGGAGGCTGAGGCAGGAGAATGGCGTGAACCCGGGAGGCGGAGCTTGCAGTGAGCCGAGATCCCGCCACTGCACTCCAGCCTGGGCGACAGAGCGAGACTCCGTCTCAAAAAAAAAAAAAAAAAAAAAAAAAAAAAAAAAAAAAAAAAAAAA	NA06986,NA07357,NA11920,NA11992,NA11993,NA11994,NA12003,NA12154,NA12249,NA12716,NA18498,NA18499,NA18501,NA18502,NA18504,NA18505,NA18508,NA18510,NA18517,NA18520,NA18638,NA18853,NA18856,NA18858,NA18870,NA18871,NA18907,NA18909,NA18912,NA18951,NA18965,NA19093,NA19102,NA19114,NA19137,NA19138,NA19147,NA19172,NA12892,NA19239,NA19240
2	107925531	.	74	.	ALU	+	INS	P1_MEI_1518	46	RP	lowcov	NA	.	YRI	.|0.09|.	0|11|0	0|2|0	.	.	.	.	2	3	MEI_RP	10	.			NA12287,NA12489,NA18861,NA18942,NA18951
2	108508497	.	10	.	ALU	+	INS	P1_MEI_3456	.	SR	lowcov	NA	.	CEU	0.09|.|.	11|0|0	2|0|0	.	.	.	.	0	1	MEI_SR	4	GENE|AC012487.1|ENSG00000214184			NA18970,NA11931
2	111180409	.	79	.	ALU	-	INS	P1_MEI_1519	189	RP	lowcov	NA	.	YRI	0.00|0.07|0.00	22|21|22	0|3|0	.	.	.	.	2	2	MEI_RP	8	.			NA18870,NA19257
2	111398836	.	4	.	ALU	-	INS	P1_MEI_3457&P2_MEI_422	269	RP|SR	lowcov+trio	NA	.	CEU	0.29|.|.	12|0|0	7|0|0	.	.	.	13	11	1	MEI_SR,MEI_RP	54	GENE|ACOXL|ENSG00000153093	AluYa5	TTTTTTTTTTTTTTTGTTAGACGGAGTCTCGCTCTGTCGCCCAGGCTGGAGTGCAGTGGCGGGATCTCGGCTCACTGCAAGCTCCGCCTCCCGGGTTCACGCCATTCTCCTGCCTCAGCCTCCCAAGTAGCTGGGACTACAGGCGCCCGCCACTACGCCCTGCCTAATTTTTTTGTATTTTTAGTAGAGACGGGGTTTTCACCGTTTTAGCCGGGATGGTCTCGATCTCCTGACCTCGTGATCCGCCCGCCTCGGCCTCCCAAAGTGCTGGGATTA	NA07347,NA11840,NA11894,NA12812,NA12872,NA12878,NA12892
2	112105992	.	10	.	ALU	-	INS	P1_MEI_3458	.	SR	lowcov	NA	.	.	0.00|.|.	17|0|0	0|0|0	.	.	.	.	1	0	MEI_SR	4	.			NA19141
2	112163893	.	1	.	ALU	-	INS	P1_MEI_154&P2_MEI_423	294	RP|SR	lowcov+trio	val	PCR	CEU+YRI+CHB+JPT	0.44|0.45|0.33	53|43|48	47|39|32	.	.	Xing|GR2009|1104685404900	12	106	148	MEI_SR,MEI_RP	80	.	AluY	TTTCTTTTTTTTTTTTTTTTTTTTTTTTTTGTAGACGGAGTCTCGCTCTGTGGCCCAGGTGGGAGTGCAGTGGCGCAATCTCGGCTCACTGCAAGCTCCGCCTCCAGGGTTCACGCCATTCTCCTGCCTCAGCCTCCCGAGTAGCTGGGACTACAGGCGCCCACCATCACGCCCGGCTAATTTTTTTTTGTATTTTTAGTAGAGACGGGGTTTCACCGTGTTAGCCAGGATGGTCTCGATCTCCTGACCTCATGATCCGCCCGCCTCGGCCTCCCAAAGTGCTGGGATTACAAGCGTGAGCCACCGCGCCCGGCC	NA06986,NA07000,NA07051,NA07346,NA07347,NA07357,NA10847,NA10851,NA11829,NA11831,NA11840,NA11919,NA11920,NA11992,NA11993,NA11994,NA11995,NA12003,NA12006,NA12043,NA12044,NA12045,NA12144,NA12154,NA12155,NA12234,NA12249,NA12489,NA12716,NA12717,NA12749,NA12751,NA12763,NA12814,NA12828,NA12872,NA12873,NA12874,NA12878,NA12891,NA12892,NA18489,NA18499,NA18501,NA18502,NA18504,NA18505,NA18508,NA18510,NA18516…
2	112170405	.	1	.	ALU	-	INS	P1_MEI_3459	294	SR	lowcov	NA	.	CEU	0.11|.|.	14|0|0	3|0|0	.	.	.	13	2	2	MEI_SR	18	.			NA12872,NA12287
2	112433017	.	9	.	ALU	-	INS	P1_MEI_1520&P2_MEI_424	84	RP|SR	lowcov+trio	val	PCR	CEU+YRI	0.08|0.12|0.00	42|42|43	7|10|0	.	.	.	0	12	20	MEI_SR,MEI_RP	80	GENE|MERTK|ENSG00000153208			NA07000,NA07037,NA11993,NA11994,NA12828,NA12878,NA12892,NA18504,NA18508,NA18907,NA19102,NA19116,NA19147,NA19190,NA19225
2	112718062	.	17	.	ALU	+	INS	P1_MEI_1521&P2_MEI_1427	64	RP	lowcov+trio	NA	.	YRI	.|0.10|0.00	0|36|42	0|7|0	.	.	Iskow|CELL2010|FSTNXB304IDMEV	14	12	4	MEI_RP	5	GENE|ZC3H8|ENSG00000144161			NA11831,NA11920,NA12043,NA12249,NA18508,NA18522,NA18861,NA19147,NA19172,NA19238
2	113822890	.	1	.	ALU	+	INS	P1_MEI_3460&P2_MEI_2260	304	SR	lowcov+trio	NA	.	.	.|.|.	0|0|0	0|0|0	.	.	Iskow|CELL2010|FSTNXB304JIZXW	25	5	15	MEI_SR	57	.	AluYa5	GGCCGGGCGGCGGGTGGCTCACGCCTGTAATCCCAGCACTTTGGGAGGCCGAGGCGGGCGGATCACGAGGTCAGGAGATCGAGACCATCCCGGCTAAAACGGTGAAACCCCGTCTCTACTAAAAATACAAAAAATTAGCCGGGCGTAGTGGCGGGCGCCTGTAGTCCCAGCTACTTGGGAGGCTAGAGGCAGGAGAATGGCGTGAACCCGGGAGGCGGAGCTTGCAGTGAGCCGAGATTGCGCCACTGCACTCCAGCCTGGGCGACAGAGCGAGACTCCGTCTACAAAAAAAAAAAAAAAAAAAAAAAAAAAGA	NA11894,NA11918,NA12043,NA12045,NA12234,NA12814,NA12872,NA12874,NA12878
2	113867796	113870081	1	1	SVA	+	DEL	P1_M_061510_2_640&P2_M_061510_2_741	2285	RP	lowcov+trio	val	ASM	CEU+YRI+CHB+JPT	0.65|0.59|0.75	24|11|28	31|13|42	.	.	.	16	.	.	washu,broad,WTSI_RP	.	.	SVA_F	GGCCACCGCGCCGGCGAGCGCCGCCAGGGAGGCAGCGGCTGGAGGAGCGGACGGGCCCCGCAGGGCCCGAGGGCAAGGAGCAGCCGCCTGCCTTGGCCTCCCAAAGTGCCGAGATTGCAGCCTCTGCCCGGCTGCCACCCCGTCTGGGAAGTGAGGAGTGTCTCTGCCTGGCCGCCCATCGTCTGGGATGTGAGGATCCCCTCTGCCTGGCTGCCCAGTCTGGAAAGTGAGGAGCGTCTCCGCCCGGCCGCCATCCCATCTAGGAAGTGAGGAGCGCCTCTTCCCAGCCGCCATCACATCTAGGAAGTGAGGAGCGTCTCTGCCCGGCCGCCCATCGTCTGAGATGTGGGGAGCGCCTCTGCCCCGCCGCCCCATCTGGGATGTGAGGAGCGCCTCTGC…	NA06986,NA07037,NA07346,NA07357,NA10847,NA10851,NA11829,NA11830,NA11831,NA11919,NA11920,NA11992,NA11994,NA11995,NA12003,NA12004,NA12006,NA12043,NA12044,NA12045,NA12154,NA12156,NA12249,NA12287,NA12716,NA12717,NA12750,NA12751,NA12761,NA12828,NA12878,NA12892,NA18489,NA18498,NA18499,NA18501,NA18504,NA18505,NA18507,NA18508,NA18510,NA18516,NA18519,NA18520,NA18523,NA18526,NA18542,NA18547,NA18558,NA18561…
2	114904875	.	9	.	ALU	-	INS	P1_MEI_155&P2_MEI_1428	195	RP|SR	lowcov+trio	NA	.	YRI	0.00|0.10|0.00	46|41|46	0|8|0	.	.	.	13	6	12	MEI_SR,MEI_RP	65	.			NA18489,NA18508,NA18523,NA19143,NA19147,NA19172,NA19238
2	115255559	.	5	.	ALU	+	INS	P2_MEI_426	292	SR|RP	trio	NA	.	.	.|.|.	0|0|0	0|0|0	.	.	.	12	36	32	MEI_SR,MEI_RP	40	GENE|DPP10|ENSG00000175497			NA19238,NA19240
2	115550336	.	7	.	ALU	-	INS	P1_MEI_156&P2_MEI_1429	160	RP|SR	lowcov+trio	NA	.	CEU+YRI	0.07|0.31|.	45|40|0	6|25|0	.	.	.	9	28	49	MEI_SR,MEI_RP	80	GENE|DPP10|ENSG00000175497	AluY	TTTTTCTTCTTTTTTTTTTTTCCGTAGACGGAGTCTCGCTCTGTCCCCCAGGCTGGAGTGCAGTGGCGCGATCTCGGCTCGCTGCAAGCTCTGCCTCCCGGGTTCAAGCCATTCTCCTGCCTCAGCCTCCTAGAGTAGCTGGGACTACAGGCGCTCGCCACCACGCCCGGCTAATTTTTTCTATTTTTTAAGTAGAGACAGGGTTTCACCGTGTTAGCCAGGATGGTCTCGATCTTCCGACCTCGTGATCCGCCCACCTCGGCCTCCCAAAGTGCTGGGATTACAGGCGTGAGCCACCGCGCCCGGCC	NA11830,NA11918,NA12004,NA12045,NA12751,NA12812,NA12874,NA18498,NA18499,NA18502,NA18508,NA18516,NA18519,NA18523,NA18526,NA18537,NA18542,NA18545,NA18552,NA18555,NA18558,NA18563,NA18571,NA18576,NA18582,NA18593,NA18603,NA18605,NA18609,NA18638,NA18853,NA18870,NA18909,NA18916,NA18943,NA18947,NA18952,NA18953,NA18956,NA18959,NA18964,NA18980,NA19108,NA19116,NA19129,NA19138,NA19141,NA19225,NA19238,NA19240…
2	115689549	115689648	1	1	L1	+	DEL	P2_M_061510_2_843	99	SR	trio	val	ASM	CEU+YRI+CHB+JPT	0.89|0.50|0.96	36|6|24	64|6|46	.	.	.	72	.	.	YALEU_SR	.	GENE|DPP10|ENSG00000175497	L1P5	TGCAACCCCTATTGAAAACAGTATGGAG	NA12878
2	116097946	.	5	.	ALU	?	INS	P1_MEI_157&P2_MEI_427	161	RP|SR	lowcov+trio	NA	.	.	0.00|.|0.00	50|0|44	0|0|0	.	.	.	15	5	5	MEI_SR,MEI_RP	78	GENE|DPP10|ENSG00000175497			NA18502,NA18523,NA18856,NA19114,NA19137,NA19141,NA19238,NA19239,NA19240
2	116190802	.	18	.	ALU	-	INS	P1_MEI_1522	290	RP	lowcov	NA	.	YRI	0.00|0.12|0.00	39|37|46	0|9|0	.	.	.	2	4	14	MEI_RP	36	GENE|DPP10|ENSG00000175497			NA18501,NA18502,NA18510,NA18523,NA18870,NA18909,NA19108,NA19257
2	116286996	116287281	1	1	ALU	-	DEL	P1_M_061510_2_264	285	RP	lowcov	val	ASM	CEU+YRI+CHB+JPT	1.00|0.94|1.00	44|53|57	88|100|114	.	.	.	15	.	.	wtsi,bc_deletion	.	GENE|DPP10|ENSG00000175497	AluYb8	TTTTTTTTTTTTTTTTTTTTTTTTTTTTGAGACGGAGTCTCGCTCTGTCGCCCAGGCCGGACTGCGGACTGCAGTGGCGCAATCTCGGCTCACTGCAAGCTCCGCTTCCCGGGTTCACGCCATTCTCCTGCCTCAGCCTCCCGAGTAGCTGGGACTACAGGCGCCCGCCACCGCGCCCGGCTAATTTTTTGTATTTTTAGTAGAGACGGGGTTTCACCTTGTTAGCCAGGATGGTCTCGATCTCCTGACCTCATGATCCACCCGCCTCGGC	NA18511,NA18861,NA18871,NA18907,NA19102
2	116903596	.	13	.	ALU	+	INS	P1_MEI_1523	257	RP	lowcov	NA	.	YRI	0.00|0.17|0.00	39|41|47	0|14|0	.	dbRIP_Alu_00529	.	15	17	3	MEI_RP	40	.			NA18499,NA18501,NA18505,NA18510,NA18511,NA18856,NA18858,NA18861,NA18909,NA18916,NA19172
2	117051394	117051710	1	1	ALU	+	DEL	P1_M_061510_2_268	316	SR,RP	lowcov	val	ASM	CEU+YRI+CHB+JPT	0.77|1.00|0.89	44|53|57	68|106|101	.	.	.	12	.	.	washu,wtsi,bc_deletion,pindel_D,broad	.	.	AluYa5	CGGCCGGGCGCGGTGGCTCACGCCTGTAATCCCAGCACTTTGGGAGGCCGAGGCGGGCGGATGACGAGGTCAGGAGATCGAGACCATCCCGGCTAAAACGGTGAAACCCCGTCTCTACTAAAAATACAAAAAAATTAGCCGGACGTAGTGGCGGGTGCCTGTAGTCCCAGCTACTTGGGAGGCTGAGGCAGGAGAATGGCGTGAACCCGGGAGGCGGAGCTTGCAGTGAGCCGAGATCCCGCCACTGCACTCCAGCCTGGGCAACAGAGCGAGACTCCGTCTCAAAAAAAAAAAAAAAAAAAAAA	NA06986,NA06994,NA07000,NA07346,NA11831,NA11894,NA11918,NA11919,NA11993,NA11994,NA12414,NA12489,NA12716,NA12749,NA12750,NA12751,NA12761,NA12776,NA12813,NA12828,NA18486,NA18519,NA18532,NA18547,NA18550,NA18555,NA18558,NA18571,NA18572,NA18582,NA18638,NA18853,NA18870,NA18952,NA18953,NA18956,NA18967,NA18968,NA18971,NA18972,NA18973,NA18974,NA18975,NA18976,NA18980,NA18981,NA19098,NA19114,NA19116,NA19119…
2	117259558	.	30	.	ALU	-	INS	P1_MEI_1524	76	RP	lowcov	NA	.	.	0.00|.|0.00	38|0|44	0|0|0	.	.	.	.	2	13	MEI_RP	30	.			NA18504,NA18507,NA18510,NA18861,NA18907,NA19108
2	117609520	117609859	1	1	ALU	+	DEL	P1_M_061510_2_270&P2_M_061510_2_118	339	SR,RP	lowcov+trio	val	ASM	CEU	0.44|.|.	27|0|0	24|0|0	esv4069	.	.	13	.	.	bc_deletion,washu,wtsi,WTSI_RP,BC_RP,PINDEL_SR,YALEU_SR,UWASH_RP	.	.	AluYb8	CGGCCGGGCGCGGTGGCTCACGCCTGTAATCCCAGCACTTTGGGAGGCCGAGGCGGGTGGATCATGAGGTCAAGAGATCGAGACCATCCTGGCTAACAAGGTGAAACCCCGTCTCTACTAAAAATACAAAAAATTAGCCGGGCGCGGTGGCGGGCGCCTGTAGTCCCAGCTACTCAGGAGGCTGAGGCAGGAGAATGGCGTGAACCCGGGAAGCGGAGCTTGCAGTGAGCCGAGATTGCGCCACTGCAGTCCGCAGTCCGGCCTGGGCGACAGAGCGAGACTCCGTCTCAAAAAAAAAAAAAAATAAAATAAAAAAAAAAAAAAAAA	NA06986,NA07037,NA07051,NA07346,NA07357,NA10847,NA10851,NA11920,NA11931,NA11992,NA11994,NA12003,NA12004,NA12006,NA12043,NA12044,NA12155,NA12156,NA12249,NA12414,NA12489,NA12716,NA12717,NA12749,NA12750,NA12751,NA12763,NA12878,NA12891,NA12892,NA18489,NA18498,NA18499,NA18502,NA18505,NA18507,NA18508,NA18511,NA18517,NA18520,NA18523,NA18526,NA18532,NA18537,NA18542,NA18545,NA18547,NA18550,NA18555,NA18562…
2	117894986	.	28	.	ALU	-	INS	P1_MEI_1525	168	RP	lowcov	NA	.	YRI	0.00|0.10|0.00	39|40|46	0|8|0	.	.	.	.	8	7	MEI_RP	30	.			NA18516,NA18520,NA18861,NA18907,NA19138,NA19190
2	118532268	.	33	.	ALU	-	INS	P1_MEI_1526	66	RP	lowcov	NA	.	CEU+YRI	0.08|0.03|0.00	38|38|44	6|2|0	.	.	.	.	2	9	MEI_RP	21	.			NA06986,NA07051,NA07357,NA11918,NA12751,NA18916
2	118622599	118622751	1	1	ALU	+	DEL	P1_M_061510_2_273&P2_M_061510_2_119	152	AS,SR,RP	lowcov+trio	val	ASM	CEU+YRI+CHB+JPT	0.56|0.24|0.49	36|52|54	40|25|53	.	.	.	15	.	.	bc_deletion,pindel_D,UWASH_RP,BC_RP,WASHU_RP,PINDEL_SR,YALEU_SR,OXFDU_AS	.	GENE|AC093901.1|ENSG00000226856	AluYa8	TTGGGAGGCTGAGGCGGGAGAATGGCGTGAACCCGGGAGGCGGAGCTTGCAGTGAGCCGAGATCCCGCCACTGCACTCCAGCCTGGGCGACAGAGCGAGACTCCGTCTCAAAAAAAAAAAAAAAAAAAAAAAAAAAAA	NA06986,NA07037,NA07051,NA07347,NA10847,NA11831,NA11894,NA11918,NA11931,NA11992,NA12003,NA12006,NA12045,NA12144,NA12249,NA12414,NA12489,NA12717,NA12749,NA12750,NA12751,NA12763,NA12776,NA12828,NA12878,NA12891,NA18499,NA18501,NA18502,NA18504,NA18505,NA18508,NA18510,NA18517,NA18519,NA18520,NA18522,NA18523,NA18532,NA18542,NA18550,NA18552,NA18558,NA18561,NA18562,NA18563,NA18564,NA18570,NA18571,NA18573…
2	118855084	.	30	.	L1	?	INS	P1_MEI_1527	3278	RP	lowcov	NA	.	YRI	0.00|0.04|0.00	41|40|47	0|3|0	.	.	.	5	2	7	MEI_RP	18	.			NA18511,NA18520,NA18856
2	118872181	.	5	.	ALU	+	INS	P2_MEI_2261	305	SR	trio	NA	.	.	.|.|.	0|0|0	0|0|0	.	.	.	17	1	2	MEI_SR	17	.			NA12878
2	119256862	.	5	.	ALU	+	INS	P1_MEI_158	299	SR|RP	lowcov	NA	.	CEU	0.12|0.00|.	42|38|0	10|0|0	.	.	.	17	11	13	MEI_SR,MEI_RP	40	.			NA07347,NA11831,NA11881,NA12003,NA12043,NA12045,NA12717,NA12751,NA12814,NA12873,NA18944,NA18965,NA19005
2	119369787	119375838	1	1	L1	-	DEL	P1_M_061510_2_274&P2_M_061510_2_16	6051	RP	lowcov+trio	val	PCR,ASM	CEU+CHB+JPT	0.82|.|0.53	36|0|50	59|0|53	esv4991	.	.	12	.	.	broad,wtsi,washu,bc_deletion,WASHU_RP,BC_RP,UWASH_RP,AB_RP,WTSI_RP	.	.	L1PA2	TCCTTTTTTTTTTTTTTTTTTTATTATACTTTAAGTTTTAGGGTACATGTGCACATTGTGCAGGTTAGTTACATATGTATACATGTGCCATGCTGGTGCGCTGCACCCACTAACGTGTCATCTAGCATTAGGTATATCTCCCAATGCTATCCCTCCCCCCTCCCCCGACCCCACCACAGTCCCCAGAGTGTGATATTCCCCTTCCTGTGTCCATGTGATCTCATTGTTCAATTCCCACCTATGCGTGAGAATATGCGGTGTTTGGTTTTTTGTTCTTGCGATAGTTTACTGAGAATGATGGTTTCCAATTTCATCCATGTCCCTACAAAGGACATGAACTCATCATTTTTTATGGCTGCATAGTATTCCATGGTGTATATGTGCCACATTTTCTTAATC…	NA06994,NA07037,NA07357,NA10847,NA11830,NA11918,NA11931,NA12003,NA12004,NA12006,NA12043,NA12155,NA12716,NA12717,NA12749,NA12751,NA12763,NA12813,NA18501,NA18502,NA18504,NA18505,NA18508,NA18510,NA18511,NA18516,NA18517,NA18519,NA18522,NA18532,NA18537,NA18542,NA18545,NA18547,NA18550,NA18552,NA18555,NA18558,NA18561,NA18563,NA18564,NA18566,NA18570,NA18572,NA18573,NA18576,NA18577,NA18579,NA18582,NA18592…
2	121654804	.	21	.	ALU	-	INS	P2_MEI_1430	256	RP	trio	NA	.	.	.|.|.	0|0|0	0|0|0	.	.	.	5	12	10	MEI_RP	40	GENE|AC079988.1|ENSG00000236145			NA19239
2	121801717	.	4	.	ALU	-	INS	P1_MEI_3461&P2_MEI_2262	311	SR	lowcov+trio	NA	.	CEU	0.07|.|.	14|0|0	2|0|0	.	.	Iskow|CELL2010|FSTNXB304INXHJ	29	6	1	MEI_SR	35	.	AluYa5	TTTTTTTTTTTTTTTTTTTTGAGACGGAGTCTCGCTCTGTCGCCCAGGCTGGAGTGCAGTGGCCGGGATCTCGGCTCACTGCAAGCTCCGCCTCCCGGGTTCACGCCATTCTCCTGCCTCAGCCTCCCAAGTAGCTGGGACTACAGGCGCCCGCCACTACGCCCGGCTAATTTTTTGTATTTTTAGTAGAGACGGGGGTTTCACCCGTTTTAGCCGGGATGTTCTCGATCTCCTGACCTCGTGATCCGCCCGCCTCGGCCTCCCAAAGTGCTGGGATTACAGGCGTGAGCCACCGCGCCCGGCC	NA11881,NA12878,NA19141,NA19143,NA19240
2	122280854	122281171	1	1	ALU	-	DEL	P1_M_061510_2_276	317	SR,RP	lowcov	val	ASM	CEU+YRI+CHB+JPT	1.00|0.88|0.90	44|53|57	88|93|103	.	.	.	12	.	.	bc_deletion,pindel_D,wtsi	.	.	AluYa5	TTTTTTTTTTTTTTTTTTTTTTTTTGAGACGGAGTCTCGCTCTGTCGCCCAGGCTGGAGTGCAGTGGTGGGATCTCGGCTCACTGCAAGCTCCGCCTCCCGGGTTCACGCCATTCTCCTGCCTCAGCCTCCCAAGTAGCTGGGACTACAGGCGCCCGCCACTACGCCCGGCTAATTTTTTGTATTTTTAGTAGAGACGGGGTTTCACCGTTTTAGCCAGGATGGTCTCGATCTCCTGACCTCGTGATCCGCCCGCCTCGGCCTCCCAAAGTGCTGGGATTACAGGCGTGAGCCACCGCGCCCGGCC	NA18507,NA18510,NA18519,NA18537,NA18550,NA18561,NA18563,NA18570,NA18577,NA18603,NA18605,NA18853,NA18870,NA18953,NA19093
2	123047109	.	1	.	ALU	+	INS	P1_MEI_159&P2_MEI_429	301	RP|SR	lowcov+trio	NA	.	CEU+YRI+CHB+JPT	0.50|0.45|0.62	53|43|50	53|39|62	.	.	.	21	230	149	MEI_SR,MEI_RP	80	.	AluYa5	GGCCGGGCGCGGTGGCTCACGCCTGTAATCCCAGCACTTTGGGAGGCCGAGGCGGGCGGATCACGAGGTCAGGGAGATCGAGACCATCCCGGCTAAAAACGGTGAAACCCCGTCTCTACTAAAAATACAAAAAATTAGCCGGGCGTAGTGGCGGGCGCCTGTAGTCCCAGCTACTTGGGAAGGCTGAGGCGGGAGAATGGCGTGAACCCCGGGAGGCGGAGCTTGCAGTGAGCCGAGATCCCGCCACTGCACTCCAGCCCTGGGGCGACAGGAGCGAGACTCCGTCTCAAAAAAAAAAAAAAAAAAAAAAAAAAGAA	NA06986,NA07000,NA07037,NA07051,NA07346,NA07347,NA07357,NA10847,NA10851,NA11829,NA11830,NA11831,NA11840,NA11881,NA11894,NA11918,NA11919,NA11920,NA11931,NA11992,NA11993,NA11994,NA12003,NA12004,NA12006,NA12043,NA12044,NA12045,NA12144,NA12154,NA12155,NA12249,NA12287,NA12489,NA12716,NA12717,NA12749,NA12750,NA12761,NA12763,NA12812,NA12815,NA12873,NA12874,NA12878,NA12891,NA18498,NA18501,NA18502,NA18505…
2	123236622	.	9	.	ALU	-	INS	P1_MEI_160	76	SR|RP	lowcov	NA	.	CEU+YRI+CHB+JPT	0.02|0.10|0.04	47|39|41	2|8|3	.	.	.	9	12	14	MEI_SR,MEI_RP	40	.			NA11992,NA12761,NA12812,NA18504,NA18511,NA18517,NA18577,NA18861,NA18952,NA18969,NA19093,NA19141,NA19190
2	123281804	.	38	.	ALU	-	INS	P1_MEI_1528	120	RP	lowcov	NA	.	CHB+JPT	0.00|0.00|0.01	39|38|43	0|0|1	.	.	.	.	2	3	MEI_RP	10	.			NA18609
2	123619722	.	25	.	ALU	-	INS	P1_MEI_1529	285	RP	lowcov	NA	.	.	0.00|.|0.00	43|0|45	0|0|0	.	.	.	9	6	11	MEI_RP	34	.			NA18489,NA18501,NA18517,NA18916,NA19138,NA19190
2	123646870	.	14	.	ALU	-	INS	P1_MEI_1530	273	RP	lowcov	NA	.	YRI+CHB+JPT	0.00|0.02|0.06	43|41|48	0|2|6	.	.	.	4	6	17	MEI_RP	40	.			NA18558,NA18563,NA18564,NA18571,NA18579,NA18861,NA18909,NA19005
2	123705604	123705934	1	1	ALU	-	DEL	P1_M_061510_2_281&P2_M_061510_2_129	330	AS,SR,RP	lowcov+trio	val	ASM	CEU+YRI+CHB+JPT	0.93|0.88|0.90	43|53|57	80|93|103	.	.	.	15	.	.	washu,pindel_D,bc_deletion,wtsi,broad,WTSI_RP,PINDEL_SR,WASHU_RP,BC_RP,YALEU_SR,OXFDU_AS	.	.	AluYb8	TTTTTTTTTTTATTTATTTTTTTTTTTTGAGACAGAGTCTCGCTCTGTTGCCCAGGCCGGACTGTGGACTGCAATGGCGCAATCTCGGCTCACTGCAAGCTCCGCTTCCTGGGTTCACGCCATTCTCCTGCCTCAGCCTCCCGAGTAGCTGGGACTACAGGCGCCCGCCACCGCGCCCGGCTAATTTTTTGTATTTTTAGTAGAGACGGGGTTTCACCTTGTTAGCCAGGATGGTCTCGATCTCCTGACCTCGTGATCCACCCGCCTCGGCCTCCCAAAGTGCTGGGATTACAGGCGTGAGCCACCGCGCCCGGCC	NA06994,NA07346,NA07357,NA11829,NA11830,NA11992,NA11995,NA12044,NA12489,NA12717,NA12749,NA12751,NA12878,NA12891,NA12892,NA18486,NA18489,NA18499,NA18504,NA18516,NA18517,NA18547,NA18552,NA18561,NA18576,NA18608,NA18858,NA18907,NA18909,NA18912,NA18916,NA18944,NA18949,NA18953,NA18959,NA18965,NA18967,NA18968,NA18971,NA18974,NA18975,NA18976,NA18981,NA19093,NA19098,NA19099,NA19131,NA19147,NA19153,NA19159…
2	123771385	.	1	.	ALU	-	INS	P1_MEI_161	300	SR|RP	lowcov	NA	.	CEU	0.24|.|.	51|0|0	24|0|0	.	.	Mills|GR2006|681950	12	44	53	MEI_SR,MEI_RP	40	.	AluYb8	TTTATTTTTTTTTTTTTTTTTTTTTGTAGACGGAGTCTTGCTCTGTCGCCCAGGCCGGACTGCGGACTGCAGTGGCGCAATCTCGGCTCACTGCAAGCTCTCTGCTTCCCGGGTTCACGCCATTCTCCTGCCTTCTAGCCTCCCGAGTAGCTGGGATTACAGGCGCCCGCCACCGCGCCCGGCTAATTTTTTGTATTTTTAGTAGAGACGGGGTTTCACCTTGTTAGCCAGGATGGTCTCGATCTCCTGACCTCATGATCCACCCGCCTCGGCCTCCCAAAGTGCTGGGATTACAGGCGTGAGCCACCGCGCCCGGCC	NA07037,NA07357,NA10851,NA11829,NA11830,NA11831,NA11840,NA11881,NA11894,NA11920,NA11992,NA11993,NA12043,NA12045,NA12234,NA12414,NA12717,NA12749,NA12751,NA12763,NA12776,NA12812,NA12815,NA12874,NA18489,NA18498,NA18501,NA18508,NA18511,NA18519,NA18537,NA18545,NA18562,NA18566,NA18603,NA18609,NA18944,NA18960,NA19141,NA19143,NA19190
2	124650243	.	10	.	L1	+	INS	P1_MEI_3462	.	SR	lowcov	NA	.	CEU	0.04|.|.	12|0|0	1|0|0	.	.	.	.	0	1	MEI_SR	4	GENE|CNTNAP5|ENSG00000155052			NA12815
2	125188953	.	10	.	ALU	+	INS	P2_MEI_2263	.	SR	trio	NA	.	.	.|.|.	0|0|0	0|0|0	.	.	.	.	0	1	MEI_SR	4	GENE|CNTNAP5|ENSG00000155052			NA12878
2	125233563	.	19	.	ALU	-	INS	P1_MEI_1531	52	RP	lowcov	NA	.	YRI	0.00|0.08|0.00	40|32|36	0|5|0	.	.	.	1	7	10	MEI_RP	34	GENE|CNTNAP5|ENSG00000155052			NA18523,NA18856,NA18907,NA18909,NA19099
2	125767563	.	4	.	ALU	-	INS	P1_MEI_1532&P2_MEI_430	177	RP|SR	lowcov+trio	NA	.	.	0.00|.|0.00	30|0|29	0|0|0	.	.	.	13	12	9	MEI_SR,MEI_RP	80	.	AluYa5	TTCTTTTTTTTGTTTTTTTTTTTTTTTTTGTAGACGGAGTCTCGCTCTGTCTCCCAGGCTGGAGTGCAGTGGCGGGATCTCGGCTCACTGCAAGCTCCACCTCCCGGGTTCACGCCATTCTCCTGCCTCTAGTTTCCCTTCCCAAGTAGCTGGGACTACAGGCGCCCGCCACTACGCCCGGCTAATTTTTTTGTATTTTTTAGGTAGAGACGGGGGTTTCACCGTTTTAGCCGGGATGGTCTTGATCTCCTGACCTCGTGATCCGCCCGCCTCGGCCTCCCAAAGTGCTGGGATTACAGGCGTGAGCCACCGCGCCCGGCC	NA18502,NA18505,NA18508,NA18517,NA18858,NA18871,NA18912,NA18916,NA19099,NA19108,NA19238,NA19239,NA19240
2	125845220	.	17	.	ALU	+	INS	P1_MEI_1533&P2_MEI_1431	221	RP	lowcov+trio	NA	.	CEU+YRI+CHB+JPT	0.03|0.08|0.08	39|36|45	2|6|7	.	.	.	.	18	11	MEI_RP	70	.			NA07346,NA07357,NA18517,NA18522,NA18562,NA18593,NA18608,NA18964,NA19005,NA19102,NA19172,NA19238
2	126006437	.	38	.	ALU	-	INS	P1_MEI_1534	243	RP	lowcov	NA	.	YRI	0.00|0.08|0.00	38|38|49	0|6|0	.	.	.	.	3	14	MEI_RP	34	.			NA18507,NA18907,NA19102,NA19129,NA19138,NA19190
2	126087184	.	5	.	ALU	-	INS	P1_MEI_162&P2_MEI_1432	301	RP|SR	lowcov+trio	NA	.	CEU+YRI+CHB+JPT	0.29|0.15|0.18	50|41|48	29|12|17	.	.	.	17	42	82	MEI_SR,MEI_RP	80	.	AluYa5	TTTTTTTTTTTTTTTTTTTTTTTTTTTTTGAGACGGAGTCTCGCTCTGTCGCCCAGGCTGGAGTGCAGTGGCGGGATCTCGGCTCACTGCAAGCTCCGCCTCCCGGGTTCACGCCATTCTCCTGCCTCAGCCTCCCAAGTAGCTGGTACTACAGGCGCCCGCCACTACGCCCGGCTAATTTTTTGTATTTTTAGTAGAGACGGGGTTTCACCGTTTTAGCCGGGATGGTCTCGATCTCCTGACCTCGTGATCCGCCCGCCTCGGCCTCCCAAAGTGCTGGGATTACAGGCGTGAGCCACCGCGCCCCGGCC	NA07000,NA07037,NA07051,NA07346,NA07357,NA11829,NA11830,NA11831,NA11881,NA11920,NA11931,NA11994,NA11995,NA12003,NA12043,NA12144,NA12155,NA12156,NA12249,NA12287,NA12716,NA12750,NA12761,NA12763,NA12812,NA12814,NA12872,NA12878,NA12891,NA12892,NA18489,NA18499,NA18501,NA18504,NA18523,NA18537,NA18545,NA18550,NA18558,NA18564,NA18576,NA18579,NA18593,NA18608,NA18870,NA18940,NA18953,NA18964,NA19005,NA19093…
2	126358096	.	7	.	ALU	+	INS	P1_MEI_3463&P2_MEI_2264	.	SR	lowcov+trio	val	PCR	CEU	0.17|.|.	15|0|0	5|0|0	.	.	.	.	0	11	MEI_SR	22	.			NA11894,NA11918,NA12812,NA12872,NA12878
2	128007459	.	10	.	L1	-	INS	P1_MEI_3464	.	SR	lowcov	NA	.	CEU	0.04|.|.	14|0|0	1|0|0	.	.	.	.	1	0	MEI_SR	4	.			NA11840
2	128355362	.	5	.	ALU	-	INS	P1_MEI_163&P2_MEI_431	276	RP|SR	lowcov+trio	NA	.	CEU+CHB+JPT	0.16|0.00|0.24	53|43|50	17|0|24	.	.	.	12	40	40	MEI_SR,MEI_RP	80	GENE|AMMECR1L|ENSG00000144233			NA07051,NA07347,NA11919,NA11920,NA11992,NA12004,NA12044,NA12045,NA12489,NA12749,NA12750,NA12751,NA12761,NA12763,NA12815,NA12878,NA12892,NA18526,NA18532,NA18537,NA18555,NA18558,NA18562,NA18564,NA18572,NA18577,NA18592,NA18603,NA18605,NA18942,NA18944,NA18945,NA18959,NA18964,NA18973,NA19005
2	128512378	.	10	.	ALU	-	INS	P1_MEI_3465	.	SR	lowcov	NA	.	.	0.00|.|.	14|0|0	0|0|0	.	.	.	.	1	0	MEI_SR	4	.			NA19141
2	128587729	128588039	1	1	ALU	+	DEL	P1_M_061510_2_289&P2_M_061510_2_139	310	SR,RP	lowcov+trio	val	ASM	CEU+YRI+CHB+JPT	0.02|0.27|0.16	44|53|55	2|29|18	esv3599	.	.	13	.	.	bc_deletion,washu,broad,wtsi,pindel_D,WTSI_RP,WASHU_RP,UWASH_RP,BC_RP,OXFDU_AS,PINDEL_SR,YALEU_SR	.	GENE|UGCGL1|ENSG00000136731	AluY	AGGCCGGGCGCGGTGGCTCACGCCTGTAATCCCAGCACTTTGGGAGGCCGAGGCGGGCGGATCACGAGGTCAGGAGATCGAGACCATCCTGGCTAACACAGTGAAACCCCGTCTCTACTAAAAAATACAAAAAATTAGCCGGGCGTGGTGGCGGGCGCCTGTAGTCCCAGCTACGCGGGAGGCTGAGGCAGGAGAATGGCGTGAACCCGGGAGGCGGAGCTTGCAGTGAGCCGAGATCGCGCCACTGCACTCCAGCCTGGGCGACAGAGCGAGACTCCGTCTCAAAAAAAAAAAAAAA	NA06986,NA06994,NA07000,NA07037,NA07051,NA07346,NA07347,NA07357,NA10847,NA10851,NA11829,NA11830,NA11831,NA11881,NA11894,NA11918,NA11919,NA11920,NA11931,NA11992,NA11993,NA11994,NA11995,NA12003,NA12004,NA12006,NA12043,NA12044,NA12045,NA12144,NA12154,NA12155,NA12156,NA12249,NA12287,NA12414,NA12489,NA12716,NA12717,NA12749,NA12750,NA12751,NA12761,NA12763,NA12776,NA12813,NA12828,NA12878,NA12891,NA12892…
[truncated: 6,540 more rows]
