# Supplementary material for: A Comprehensive Map of Mobile Element Insertion Polymorphisms in Humans
Source: PLoS Genet. 2011 Aug 18;7(8):e1002236. doi: 10.1371/journal.pgen.1002236 (PMC3158055; doi:10.1371/journal.pgen.1002236)
Supplement: Table S2 — Samples with corresponding sequence coverage (external Excel file) Sequence coverage for each of the 185 samples calculated in terms of Illumina span-coverage for RP detection, 454 base coverage for SR detection and Illumina base-coverage (including single-end read data) for deletion detection. (XLSX) [file pgen.1002236.s020.xlsx]

## Sheet: 1000GP samples
ID	population	pilot	SLX_RP_spancov	454_SR_basecov	SLX_basecov	Genotyped_MEI_ins	Genotyped_MEI_del	SLX	454	AB	PCR sample
NA12878	CEU	trio	17.4	11	15.9	1110	958	1	1	1	1
NA12891	CEU	trio	8.4	0	14.9	745	935	1	0	0	1
NA12892	CEU	trio	11.3	0	9.2	739	939	1	0	0	1
NA19238	YRI	trio	15.9	0	7.6	1007	1066	1	0	0	1
NA19239	YRI	trio	27.6	0	12.2	988	1010	1	0	0	1
NA19240	YRI	trio	32	5.6	16.9	1296	1076	1	1	1	1	Notes:
NA06985	CEU	lowcov	0	0	0	0	0	0	0	1		SLX_RP_spancov	Span coverage of Illumina paired-end data
NA06986	CEU	lowcov	3	0	2.9	566	983	1	0	1	1	454_SR_basecov	Base coverage of 454 reads (FLX and titanium)
NA06994	CEU	lowcov	0	0	4.9	0	829	1	0	1		SLX_basecov	Base coverage of Illumina data, including single end
NA07000	CEU	lowcov	2.8	0	1.4	555	829	1	0	1		Genotyped_MEI_ins	Number of genotyped MEI sites detected as insertions in this sample
NA07037	CEU	lowcov	3.1	0	2.7	626	976	1	0	0		Genotyped_MEI_del	Number of genotyped MEI sites detected as deletions in this sample
NA07051	CEU	lowcov	3.3	0	3.9	594	1016	1	0	0		SLX	Illumina data available from 1000 Genomes Project
NA07346	CEU	lowcov	1.9	1.5	1.9	693	960	1	1	0	1	454	454 data available
NA07347	CEU	lowcov	1.3	1.9	1.2	613	857	1	1	0	1	AB	AB SOLiD data available
NA07357	CEU	lowcov	2.8	0	2.2	557	918	1	0	1	1
NA10847	CEU	lowcov	2.3	0	3.4	572	0	1	0	0
NA10851	CEU	lowcov	3.2	0	3.5	603	0	1	0	1
NA11829	CEU	lowcov	1.2	0	1	410	837	1	0	1
NA11830	CEU	lowcov	1.2	0	2.2	401	887	1	0	1
NA11831	CEU	lowcov	2	0	2	511	946	1	0	1	1
NA11832	CEU	lowcov	0	0	0	0	0	1	0	1
NA11840	CEU	lowcov	0	2.4	0	207	0	0	1	1
NA11881	CEU	lowcov	1.2	2.1	1.4	701	839	1	1	0	1
NA11894	CEU	lowcov	1.1	2.1	1.5	617	854	1	1	0	1
NA11918	CEU	lowcov	2.5	2	2.7	701	842	1	1	0
NA11919	CEU	lowcov	1.6	0	3.1	478	989	1	0	0
NA11920	CEU	lowcov	2.5	0	2.1	539	983	1	0	1
NA11931	CEU	lowcov	0.8	2	1.4	609	812	1	1	0
NA11992	CEU	lowcov	1.8	0	3.3	508	1010	1	0	1
NA11993	CEU	lowcov	1.3	0	1.4	411	813	1	0	1
NA11994	CEU	lowcov	1.3	0	2.6	437	905	1	0	1
NA11995	CEU	lowcov	1.4	0	1.5	451	865	1	0	1
NA12003	CEU	lowcov	2.6	0	2.4	546	972	1	0	1	1
NA12004	CEU	lowcov	1.5	0	1.4	472	0	1	0	1
NA12005	CEU	lowcov	0	0	0	0	0	1	0	1
NA12006	CEU	lowcov	1	0	1.1	428	766	1	0	1
NA12043	CEU	lowcov	1.3	2.1	1.2	682	833	1	1	0	1
NA12044	CEU	lowcov	1.7	0	1.8	496	887	1	0	1
NA12045	CEU	lowcov	1.7	2.1	1.4	636	870	1	1	0
NA12144	CEU	lowcov	1.9	0	1.6	513	861	1	0	1
NA12154	CEU	lowcov	1.6	0	1.5	486	889	1	0	1
NA12155	CEU	lowcov	1.1	0	1.1	417	906	1	0	0
NA12156	CEU	lowcov	1.3	0	1.1	410	780	1	0	1
NA12234	CEU	lowcov	0	2	0	189	0	0	1	0
NA12249	CEU	lowcov	2.5	2.3	2.1	869	937	1	1	0
NA12287	CEU	lowcov	0.7	2.1	1.4	590	810	1	1	0
NA12414	CEU	lowcov	0.9	0	1	424	0	1	0	1
NA12489	CEU	lowcov	1.1	0	1.2	458	750	1	0	1
NA12716	CEU	lowcov	2.7	0	6.8	534	968	1	0	0
NA12717	CEU	lowcov	2.5	0	5.9	601	0	1	0	0
NA12749	CEU	lowcov	1	0	1.2	424	808	1	0	1
NA12750	CEU	lowcov	2.4	0	5	581	962	1	0	0
NA12751	CEU	lowcov	2.2	0	5.4	557	956	1	0	0
NA12760	CEU	lowcov	0	0	0	0	0	0	0	1
NA12761	CEU	lowcov	2.5	0	5.8	572	986	1	0	0
NA12762	CEU	lowcov	0	0	0	0	0	0	0	1
NA12763	CEU	lowcov	1.3	0	5	492	943	1	0	0
NA12776	CEU	lowcov	1.1	0	1.2	442	845	1	0	0
NA12812	CEU	lowcov	0	3.4	0	281	0	0	1	0
NA12813	CEU	lowcov	0	0	4	0	748	1	0	1
NA12814	CEU	lowcov	0	3.3	0	326	0	0	1	0
NA12815	CEU	lowcov	0	3.2	0	264	0	0	1	0
NA12828	CEU	lowcov	1.1	0	1.3	470	838	1	0	0	1
NA12872	CEU	lowcov	0	3.5	0	300	0	0	1	0
NA12873	CEU	lowcov	0	3.3	0	315	0	0	1	0
NA12874	CEU	lowcov	0	3.5	0	293	0	0	1	0
NA18486	YRI	lowcov	0.1	0	0.5	107	694	1	0	0
NA18489	YRI	lowcov	1.3	0	2.4	455	1028	1	0	0
NA18498	YRI	lowcov	1.3	0	2.1	476	973	1	0	0
NA18499	YRI	lowcov	1.4	0	1.7	527	1012	1	0	0
NA18501	YRI	lowcov	4.1	0	3.3	729	1129	1	0	0
NA18502	YRI	lowcov	2.7	0	3	691	0	1	0	0
NA18504	YRI	lowcov	1.3	0	2.6	487	1058	1	0	1	1
NA18505	YRI	lowcov	3.1	0	3.3	719	1066	1	0	0
NA18507	YRI	lowcov	0.9	0	1.1	400	789	1	0	0
NA18508	YRI	lowcov	3.1	0	2.6	722	1029	1	0	0
NA18510	YRI	lowcov	1.9	0	1.9	625	1074	1	0	0
NA18511	YRI	lowcov	0.9	0	1.1	458	864	1	0	0
NA18516	YRI	lowcov	0.6	0	2.1	396	932	1	0	0
NA18517	YRI	lowcov	2	0	2.3	637	1055	1	0	0
NA18519	YRI	lowcov	1.5	0	1.8	603	1037	1	0	0
NA18520	YRI	lowcov	0.7	0	1.9	389	1034	1	0	0
NA18522	YRI	lowcov	1.6	0	3.9	600	0	1	0	0
NA18523	YRI	lowcov	3	0	3	762	0	1	0	0
NA18526	CHB	lowcov	1.5	0	1.7	548	894	1	0	0
NA18532	CHB	lowcov	0.8	0	1.3	371	846	1	0	0
NA18537	CHB	lowcov	2.4	0	1.6	580	911	1	0	0
NA18542	CHB	lowcov	1.3	0	1.8	481	898	1	0	0	1
NA18545	CHB	lowcov	1.6	0	1.7	481	831	1	0	0
NA18547	CHB	lowcov	0.6	0	1.4	374	0	1	0	0
NA18550	CHB	lowcov	2.4	0	1.6	540	859	1	0	0
NA18552	CHB	lowcov	2.4	0	1.7	598	944	1	0	0
NA18555	CHB	lowcov	2.1	0	1.6	551	892	1	0	0
NA18558	CHB	lowcov	1.9	0	1.7	547	896	1	0	0
NA18561	CHB	lowcov	2.5	0	1.6	575	881	1	0	0
NA18562	CHB	lowcov	1.2	0	1	451	806	1	0	0
NA18563	CHB	lowcov	1.7	0	1.6	519	883	1	0	0	1
NA18564	CHB	lowcov	2.1	0	1.7	615	905	1	0	0
NA18566	CHB	lowcov	1.8	0	1.6	528	865	1	0	0
NA18570	CHB	lowcov	1.7	0	1.7	521	902	1	0	0
NA18571	CHB	lowcov	1.6	0	1.8	533	908	1	0	0
NA18572	CHB	lowcov	2	0	1.9	559	897	1	0	0	1
NA18573	CHB	lowcov	1.4	0	1.6	483	867	1	0	0
NA18576	CHB	lowcov	3.5	0	1.6	599	916	1	0	0
NA18577	CHB	lowcov	1.7	0	1.8	537	907	1	0	0	1
NA18579	CHB	lowcov	1.8	0	1.5	536	926	1	0	0
NA18582	CHB	lowcov	1	0	1.7	453	917	1	0	0
NA18592	CHB	lowcov	2.3	0	1.9	545	919	1	0	0
NA18593	CHB	lowcov	3	0	1.7	620	920	1	0	0
NA18603	CHB	lowcov	1.3	0	1.5	482	891	1	0	0
NA18605	CHB	lowcov	1.4	0	1.4	516	901	1	0	0
NA18608	CHB	lowcov	1.7	0	1.7	520	870	1	0	0
NA18609	CHB	lowcov	2.1	0	1.7	532	934	1	0	0
NA18638	CHB	lowcov	2.6	0	1.7	581	948	1	0	0
NA18853	YRI	lowcov	1.5	0	2.1	541	1078	1	0	0
NA18856	YRI	lowcov	1.4	0	1.5	526	0	1	0	0
NA18858	YRI	lowcov	1.5	0	2.6	607	1056	1	0	0
NA18861	YRI	lowcov	2.3	0	2.8	655	1041	1	0	0
NA18870	YRI	lowcov	2.8	0	2.2	641	1111	1	0	0	1
NA18871	YRI	lowcov	1.3	0	2.1	544	1094	1	0	0
NA18907	YRI	lowcov	3.9	0	2.8	772	0	1	0	0
NA18909	YRI	lowcov	1.9	0	1.6	631	964	1	0	0
NA18912	YRI	lowcov	1.1	0	3.4	445	1043	1	0	1	1
NA18916	YRI	lowcov	1.6	0	2.5	622	980	1	0	0
NA18940	JPT	lowcov	2.5	0	1.3	517	807	1	0	0
NA18942	JPT	lowcov	2	0	1.4	446	763	1	0	0	1
NA18943	JPT	lowcov	0.9	0	1.5	409	816	1	0	0	1
NA18944	JPT	lowcov	1.8	0	1.4	474	774	1	0	0	1
NA18945	JPT	lowcov	1.2	0	1.5	455	817	1	0	0	1
NA18947	JPT	lowcov	1.1	0	1.5	409	810	1	0	0
NA18948	JPT	lowcov	1.3	0	1.7	495	811	1	0	0
NA18949	JPT	lowcov	1.3	0	1.8	473	794	1	0	0
NA18951	JPT	lowcov	1	0	1.6	438	812	1	0	0
NA18952	JPT	lowcov	1.5	0	1.6	436	783	1	0	0
NA18953	JPT	lowcov	0.5	0	2	226	905	1	0	0	1
NA18956	JPT	lowcov	1.1	0	1.7	442	789	1	0	0
NA18959	JPT	lowcov	1.4	0	1.4	407	847	1	0	0
NA18960	JPT	lowcov	1.1	0	1.3	423	856	1	0	0
NA18961	JPT	lowcov	1.7	0	3	521	992	1	0	0
NA18964	JPT	lowcov	2.5	0	2.5	550	976	1	0	0
NA18965	JPT	lowcov	1.1	0	1.5	517	788	1	0	0
NA18967	JPT	lowcov	0	0	4.7	0	710	1	0	0
NA18968	JPT	lowcov	0	0	4	0	689	1	0	0
NA18969	JPT	lowcov	0	0.6	0	54	0	0	1	0
NA18970	JPT	lowcov	0	2.2	0	204	0	0	1	0
NA18971	JPT	lowcov	0	0	4.7	0	771	1	0	0
NA18972	JPT	lowcov	0	0	3.9	0	706	1	0	0
NA18973	JPT	lowcov	1.5	0	1.5	458	816	1	0	0
NA18974	JPT	lowcov	0	0	3.9	0	766	1	0	0
NA18975	JPT	lowcov	0	0	4.4	0	782	1	0	0
NA18976	JPT	lowcov	0	0	5.6	0	805	1	0	0
NA18980	JPT	lowcov	1.5	0	1	350	740	1	0	0
NA18981	JPT	lowcov	0	0	5.3	0	806	1	0	0
NA19005	JPT	lowcov	0.9	0	1.3	402	767	1	0	0
NA19093	YRI	lowcov	4.6	0	3.3	737	1107	1	0	0
NA19098	YRI	lowcov	0	0	2.8	0	774	1	0	0
NA19099	YRI	lowcov	2.7	0	2.7	705	1032	1	0	0
NA19102	YRI	lowcov	2.1	0	2.4	607	1093	1	0	0
NA19108	YRI	lowcov	2.3	0	3.9	735	1112	1	0	0
NA19114	YRI	lowcov	2.4	0	2.7	685	1044	1	0	0
NA19116	YRI	lowcov	0.9	0	2.4	434	877	1	0	0
NA19119	YRI	lowcov	0	0	3	0	759	1	0	0
NA19129	YRI	lowcov	1.6	0	1.8	611	0	1	0	0
NA19131	YRI	lowcov	0	0	3.6	0	763	1	0	0
NA19137	YRI	lowcov	0.8	0	5.7	228	909	1	0	1
NA19138	YRI	lowcov	3.5	0	8.9	729	1108	1	0	0
NA19141	YRI	lowcov	0	1.9	0	209	0	0	1	0
NA19143	YRI	lowcov	0	2.2	0	255	0	0	1	0
NA19144	YRI	lowcov	0	0	1.4	0	657	1	0	0
NA19147	YRI	lowcov	2.7	0	2.6	699	1067	1	0	0
NA19152	YRI	lowcov	0	0	5.8	0	903	1	0	0
NA19153	YRI	lowcov	0	0	3.6	0	772	1	0	0
NA19159	YRI	lowcov	0	0	3.7	0	863	1	0	0
NA19160	YRI	lowcov	0	0	4.7	0	898	1	0	0
NA19171	YRI	lowcov	0	0	1.7	0	692	1	0	1
NA19172	YRI	lowcov	0.7	0	2.2	387	1067	1	0	0
NA19190	YRI	lowcov	1.7	0	1.3	582	891	1	0	0
NA19200	YRI	lowcov	0	0	4.6	0	816	1	0	0
NA19201	YRI	lowcov	0	0	3.8	0	785	1	0	0	1
NA19204	YRI	lowcov	0	0	3.9	0	846	1	0	0
NA19207	YRI	lowcov	0	0	3.7	0	854	1	0	0
NA19209	YRI	lowcov	0	0	4.1	0	799	1	0	0
NA19210	YRI	lowcov	0.7	0	0.4	196	704	1	0	1	1
NA19225	YRI	lowcov	1.3	0	1.9	617	935	1	0	0
NA19257	YRI	lowcov	4.3	0	2.4	732	1024	1	0	0
