# Supplementary material for: A Comprehensive Map of Mobile Element Insertion Polymorphisms in Humans
Source: PLoS Genet. 2011 Aug 18;7(8):e1002236. doi: 10.1371/journal.pgen.1002236 (PMC3158055; doi:10.1371/journal.pgen.1002236)
Supplement: Table S10 — Loss of Function variants (external Excel file). Counts of insertions occurring within genes, UTR, and CDS regions annotated from Gencode version 3b. This table is partially shown as Table 1 in the main text. Only insertions with breakpoint confidence intervals entirely within the annotation region are counted. Any insertion candidate subsequently invalidated is not counted. A random placement model is used to estimate the number of expected insertions in the absence of selection. a) MEI counts. b) The corresponding counts of SNPs from the low coverage pilots are also listed along with the expected numbers of SNPs based on random placement. The suppression factor for MEI (∼46×) is similar to that of a SNP changing a stop codon (∼42×). (XLSX) [file pgen.1002236.s028.xlsx]

## Sheet: LOF
a) MEI loci (main text Table 1b except for the p-value)
.	Gene	Exon	UTR	CDS
ALU	1438	39	32	2
L1	249	7	4	0
SVA	31	1	0	1
total	1718	47	36	3
expected	2020	338	105	137
supression factor	1.2	7.2	2.9	45.7
log(p-val)	-11.5	-87.3	-14.2	-53.9
b) SNP loci (based on 1000G low coverage pilot release VCF files)
.	lowcov	CDS	STOPLOSS
SNP	14894361	117523	71
expected	-	459007	2995
supression factor	-	3.9	42.2
Notes:
Suppression factor is the ratio of expected insertions to observed
